# Supplementary material for: Global Transcriptome Profiling of Salicornia europaea L. Shoots under NaCl Treatment
Source: PLoS One. 2013 Jun 25;8(6):e65877. doi: 10.1371/journal.pone.0065877 (PMC3692491; doi:10.1371/journal.pone.0065877)
Supplement: Additional File S3 — Primers and amplification results of 18 unigenes used to confirm the sequencing quality. The table shows sequences and annealing temperatures (Tm) and production of primers. (XLS) [file pone.0065877.s003.xls]

## Sheet: Sheet1
No.	Gene ID	Primer name	Primer sequence	Primer work or no	Tm	Product length	Nr-annotation
1	Unigene16272_All	SeHKT-S	5-CTTCATCATCAACATCACCACCACCATC	yes	69.5	1302	sodium transporter hkt1-like protein [Populus trichocarpa]
		SeHKT-A	5-GAATAAACTTCCCTTGCCAACTCCATCG		70.3
2	Unigene29489_All	SeABC-S	5-CTTCTTTATTAGGCGGATGTTCTCTG	yes	62.6	2058	ABC transporter [Arabidopsis thaliana]
		SeABC-A	5-CTTGGGTCTCTCCTTCTCTTTCACTG		64.2
3	Unigene36542_All	SeNHX-S	5-CCTTTATGTGGGTATGGATGTATTT	yes	59	803	NHX Na+/H+ exchanger 4 [Arabidopsis
		SeNHX-A	5-CCTCAAGCTCAAGAATCTAATGTGT		59.8
4	Unigene29477_All	SeAAT-S	5-ACATTCACAAACTCACAACTCCCAC	yes	62.1	1797	amino acid transporter family protein [Arabidopsis
		SeAAT-A	5-TATCAAGAACCAAATCACAAACCCT		61.4
5	Unigene29572_All	SeMT-S	5-TGGCACCTCCGATAACATAG	yes	56	1302	magnesium transporter [Populus trichocarpa]
		SeMT-A	5-CCGCAGAAATACTGAAGCAT		55.6
6	Unigene41633_All	SeProT-S	5-CCCCTGAAACTAACTCACAAC	yes	54	747	proline transporter [Populus trichocarpa]
		SeProT-A	5-AATAGAACATCCACCCATACC		53.3
7	Unigene54951_All	SeAAP-S	5-AAAACACCACAACATAAGAACAT	no	53.8	875	amino acid permease [Populus trichocarpa]
		SeAAP-A	5-TAGAAGTATTTGAGTACACCCGA		54.3
8	Unigene3812_All	SeMAPK-S	5-TCTGACCTCTCATTTCATCTTTTCT	yes	58.7	927	mitogen-activated protein kinase 18 [Arabidopsis thaliana]
		SeMAPK-A	5-ACACGTTAGCTGTATGCATGTATTT		58.4
9	Unigene30296_All	SeUk1-S	5-TTACCAGAATTTATATAGGAATG	no	49.4	1099	unknow
		SeUk1-A	5-CTCTTATCTTATGAATAGTGTCA		46.8
10	Unigene30331_All	SeUk2-S	5-TGATGGTAATTTCAGGGTGTGGGA	yes	65.2	1344	unknow
		SeUk2-A	5-AAAGAGGAGACAAGATGAGGGGCA		65.4
11	Unigene27693_All	SeUk3-S	5-TACATACCTTTTTACATTGGGCCA	no	60.9	2926	unknow
		SeUk3-A	5-GACGAGATCGGAGTTTCTTTGAGC		63.6
12	Unigene1691_All	SeUk4-S	5-GACTAACTACACAAACCTTCCCCGAT	yes	63.6	2396	unknow
		SeUk4-A	5-CTCCATTTTCTCTTTTTCTTCTCCAT		61.4
13	Unigene38_All	SeUk5-S	5-ATTTCAGAACATAGGAAGCATTACTCAA	yes	61.9	2000	unknow
		SeUk5-A	5-TAATAAGATAGGATGCCCCTGCGATAAC		66.7
14	Unigene606_All	SeUk6-S	5-CTCTATCTCTTCTTCTCTGCTCTGC	no	58.6	1803	unknow
		SeUk6-A	5-TTGCTCTTGAACTTCATCAATCTCC		61.9
15	Unigene32077_All	SeUk7-S	5-GAGAGAGAGATAGAGAGAGTGGGCG	yes	62.3	1653	unknow
		SeUk7-A	5-GCAAGAGAACTTGATGTTCTGGTCA		62.6
16	Unigene18912_All	SeUk8-S	5-AATGTCTCTCCCCCATTTTCACACA	yes	65.8	1805	unknow
		SeUk8-A	5-CTCTTCCCCATCTTCCTATCGCTTA		64.6
17	Unigene40137_All	SeUk9-S	5-GTGTGTATTATATTATAGCCTTCGGG	no	58.7	1582	unknow
		SeUk9-A	5-ACTTTTTAGGAGTTTAGTGTTCGGTC		59.5
18	Unigene41925_All	SeSOS1-S	5-GCTTGCCTGGTCTTTACTACTCGTA	yes	61.7	2153	salt overly sensitive 1 [Salicornia brachiata]
		SeSOS1-A	5-CATCTTTTTTTCCTCACTTTCTCTT		58.2

## Sheet: Sheet2
No.	GeneID	Forward(5'-3')	Reverse(5'-3')	Tm(℃)	Product length(bp)	Nr-annotation
1	Unigene16272_All	CTTCATCATCAACATCACCACCACCATC	GAATAAACTTCCCTTGCCAACTCCATCG	69.5/70.3	1302	sodium transporter hkt1-like protein [Populus trichocarpa]
2	Unigene29489_All	CTTCTTTATTAGGCGGATGTTCTCTG	CTTGGGTCTCTCCTTCTCTTTCACTG	62.6/64.5	2058	ABC transporter [Arabidopsis thaliana]
3	Unigene36542_All	CCTTTATGTGGGTATGGATGTATTT	CCTCAAGCTCAAGAATCTAATGTGT	59/59.8	803	NHX Na+/H+ exchanger 4 [Arabidopsis
4	Unigene29477_All	ACATTCACAAACTCACAACTCCCAC	TATCAAGAACCAAATCACAAACCCT	62.1/61.4	1797	amino acid transporter family protein [Arabidopsis
5	Unigene29572_All	TGGCACCTCCGATAACATAG	CCGCAGAAATACTGAAGCAT	56/55.6	1302	magnesium transporter [Populus trichocarpa]
6	Unigene41633_All	CCCCTGAAACTAACTCACAAC	AATAGAACATCCACCCATACC	54/53.3	747	proline transporter [Populus trichocarpa]
7	Unigene54951_All	AAAACACCACAACATAAGAACAT	TAGAAGTATTTGAGTACACCCGA	53.8/54.3	No	amino acid permease [Populus trichocarpa]
8	Unigene3812_All	TCTGACCTCTCATTTCATCTTTTCT	ACACGTTAGCTGTATGCATGTATTT	58.7/58.4	927	mitogen-activated protein kinase 18 [Arabidopsis thaliana]
9	Unigene30296_All	TTACCAGAATTTATATAGGAATG	CTCTTATCTTATGAATAGTGTCA	49.4/46.8	No	unknow
10	Unigene30331_All	TGATGGTAATTTCAGGGTGTGGGA	AAAGAGGAGACAAGATGAGGGGCA	65.2/65.4	1344	unknow
11	Unigene27693_All	TACATACCTTTTTACATTGGGCCA	GACGAGATCGGAGTTTCTTTGAGC	60.9/63.6	No	unknow
12	Unigene1691_All	GACTAACTACACAAACCTTCCCCGAT	CTCCATTTTCTCTTTTTCTTCTCCAT	63.6/61.4	2396	unknow
13	Unigene38_All	ATTTCAGAACATAGGAAGCATTACTCAA	TAATAAGATAGGATGCCCCTGCGATAAC	61.9/66.7	2000	unknow
14	Unigene606_All	CTCTATCTCTTCTTCTCTGCTCTGC	TTGCTCTTGAACTTCATCAATCTCC	58.6/61.9	No	unknow
15	Unigene32077_All	GAGAGAGAGATAGAGAGAGTGGGCG	GCAAGAGAACTTGATGTTCTGGTCA	62.3/62.6	1653	unknow
16	Unigene18912_All	AATGTCTCTCCCCCATTTTCACACA	CTCTTCCCCATCTTCCTATCGCTTA	65.8/64.6	1805	unknow
17	Unigene40137_All	GTGTGTATTATATTATAGCCTTCGGG	ACTTTTTAGGAGTTTAGTGTTCGGTC	58.7/59.5	No	unknow
18	Unigene41925_All	GCTTGCCTGGTCTTTACTACTCGTA	CATCTTTTTTTCCTCACTTTCTCTT	61.7/58.2	2153	salt overly sensitive 1 [Salicornia brachiata]
