# Supplementary material for: Global Transcriptome Profiling of Salicornia europaea L. Shoots under NaCl Treatment
Source: PLoS One. 2013 Jun 25;8(6):e65877. doi: 10.1371/journal.pone.0065877 (PMC3692491; doi:10.1371/journal.pone.0065877)
Supplement: Additional File S6 — Summary and functional annotation of identified DEGs. Unigenes with an absolute value of |log2Ratio| ≥1 and FDR ≤0.001 were identified as DEGs. GO and KEGG analyses of DEGs were based on a cutoff E-value of less than or equal to 10–5. (XLS) [file pone.0065877.s006.xls]

## Sheet: Additional file S4
geneID	geneLength	Se200S_rawreads(24117495)	SeCKS_rawreads(25613674)	Se200S_RPKM	SeCKS_RPKM	log2(Se200S_RPKM/SeCKS_RPKM)	up/down	pvalue	FDR	Nr-ID	Nr-Score	Nr-Evalue	Nr-annotation	Swissprot-ID	Swissprot-Score	Swissprot-Evalue	Swissprot-annotation	COG-Protein-or-Domain	COG-Score	COG-Evalue	COG-ID	COG-Function-Description	KO_id	KEGG-Evalue	KEGG-Score	KEGG-Gene	ko_definition	GO-BiologicalProcess	GO-MolecularFunction	Go-CellularComponent
Unigene78294_All	381	81	0	8.8151	0	13.1058	up	3.38e-26	2.84e-24	--	--	--	--	--	--	--	--	--	--	--	--	--	--	--	--	--	--	-	-	-
Unigene78943_All	288	55	0	7.9184	0	12.951	up	5.02e-18	2.8e-16	--	--	--	--	--	--	--	--	--	--	--	--	--	--	--	--	--	--	-	-	-
Unigene81720_All	230	41	0	7.3914	0	12.8516	up	1.26e-13	5.09e-12	--	--	--	--	--	--	--	--	--	--	--	--	--	--	--	--	--	--	-	-	-
Unigene52552_All	239	34	0	5.8986	0	12.5262	up	2e-11	6.55e-10	--	--	--	--	--	--	--	--	--	--	--	--	--	--	--	--	--	--	-	-	-
Unigene79044_All	947	131	0	5.7357	0	12.4858	up	6.51e-42	9.74e-40	gi|20138131|sp|Q9FPQ6.1|GP1_CHLRE	61.2	9e-17	RecName: Full=Vegetative cell wall protein gp1; AltName: Full=Hydroxyproline-rich glycoprotein 1; Flags: Precursor >gi|12018147|gb|AAG45420.1|AF309494_1 vegetative cell wall protein gp1 [Chlamydomonas reinhardtii]	sp|Q9FPQ6|GP1_CHLRE	61.2	5e-17	Vegetative cell wall protein gp1 OS=Chlamydomonas reinhardtii GN=GP1 PE=2 SV=1	YPO2725	61.2	2e-09	COG3501	Uncharacterized protein conserved in bacteria	--	--	--	--	--	-	-	-
Unigene25924_All	348	47	0	5.6	0	12.4512	up	1.64e-15	7.71e-14	--	--	--	--	sp|Q9C168|CAT1_NEUCR	67.4	3e-11	Catalase-1 OS=Neurospora crassa GN=cat-1 PE=1 SV=2	--	--	--	--	--	--	--	--	--	--	-	-	-
Unigene12342_All	492	66	0	5.5622	0	12.4414	up	1.75e-21	1.18e-19	gi|115459228|ref|NP_001053214.1|	62.4	2e-09	Os04g0498700 [Oryza sativa Japonica Group] >gi|38345395|emb|CAD41241.2| OSJNBa0067K08.24 [Oryza sativa Japonica Group] >gi|113564785|dbj|BAF15128.1| Os04g0498700 [Oryza sativa Japonica Group]	sp|Q06153|CEUL_OPHUL	60.8	4e-09	Cerato-ulmin OS=Ophiostoma ulmi GN=CU PE=1 SV=1	YPO2725	42.7	5e-06	COG3501	Uncharacterized protein conserved in bacteria	--	--	--	--	--	-	-	GO:0016020//membrane
Unigene80879_All	281	37	0	5.4596	0	12.4146	up	2.28e-12	8.17e-11	--	--	--	--	--	--	--	--	--	--	--	--	--	--	--	--	--	--	-	-	-
Unigene75436_All	467	60	0	5.3272	0	12.3792	up	1.35e-19	8.17e-18	--	--	--	--	--	--	--	--	--	--	--	--	--	--	--	--	--	--	-	-	-
Unigene81760_All	454	57	0	5.2058	0	12.3459	up	1.18e-18	6.83e-17	--	--	--	--	--	--	--	--	--	--	--	--	--	--	--	--	--	--	-	-	-
Unigene87718_All	209	26	0	5.1582	0	12.3327	up	6.53e-09	1.6e-07	--	--	--	--	--	--	--	--	--	--	--	--	--	--	--	--	--	--	-	-	-
Unigene25519_All	327	39	0	4.9452	0	12.2718	up	5.36e-13	2.04e-11	--	--	--	--	--	--	--	--	--	--	--	--	--	--	--	--	--	--	-	-	-
Unigene81674_All	328	38	0	4.8037	0	12.2299	up	1.11e-12	4.08e-11	--	--	--	--	sp|P89678|RDRP_TOBSV	200	2e-51	RNA-directed RNA polymerase 2a OS=Tobacco streak virus (strain WC) GN=ORF2a PE=3 SV=1	--	--	--	--	--	--	--	--	--	--	-	-	-
Unigene81679_All	311	36	0	4.7997	0	12.2287	up	4.7e-12	1.63e-10	--	--	--	--	--	--	--	--	--	--	--	--	--	--	--	--	--	--	-	-	-
Unigene85713_All	239	27	0	4.6842	0	12.1936	up	3.17e-09	8.05e-08	--	--	--	--	--	--	--	--	--	--	--	--	--	--	--	--	--	--	-	-	-
Unigene83086_All	261	29	0	4.6071	0	12.1696	up	7.45e-10	2.05e-08	--	--	--	--	--	--	--	--	--	--	--	--	--	--	--	--	--	--	-	-	-
Unigene89341_All	325	36	0	4.5929	0	12.1652	up	4.7e-12	1.63e-10	gi|195657733|gb|ACG48334.1|	101	3e-21	cytochrome b5 [Zea mays]	sp|Q9P5L0|CYB5_NEUCR	152	6e-37	Probable cytochrome b5 OS=Neurospora crassa GN=B23L21.190 PE=3 SV=2	SPCC16A11.10c	104	3e-23	COG5274	Cytochrome b involved in lipid metabolism	K00360	5e-14	73.2	osa:4345795	nitrate reductase (NADH) [EC:1.7.1.1]	GO:0006091//generation of precursor metabolites and energy	GO:0005506//iron ion binding	GO:0043231//intracellular membrane-bounded organelle;GO:0044425//membrane part
Unigene81244_All	260	28	0	4.4653	0	12.1245	up	1.54e-09	4.06e-08	--	--	--	--	--	--	--	--	--	--	--	--	--	--	--	--	--	--	-	-	-
Unigene81266_All	308	33	0	4.4425	0	12.1172	up	4.12e-11	1.31e-09	gi|303271877|ref|XP_003055300.1|	51.2	4e-06	iron-sulfur cofactor synthesis protein [Micromonas pusilla CCMP1545] >gi|226463274|gb|EEH60552.1| iron-sulfur cofactor synthesis protein [Micromonas pusilla CCMP1545]	sp|Q6CFQ0|ISU1_YARLI	53.1	5e-07	Iron sulfur cluster assembly protein 1, mitochondrial OS=Yarrowia lipolytica (strain CLIB 122 / E 150) GN=ISU1 PE=3 SV=1	YPL135w	48.9	2e-06	COG0822	NifU homolog involved in Fe-S cluster formation	--	--	--	--	--	-	-	-
Unigene39152_All	246	26	0	4.3823	0	12.0975	up	6.53e-09	1.6e-07	--	--	--	--	sp|P89678|RDRP_TOBSV	109	5e-24	RNA-directed RNA polymerase 2a OS=Tobacco streak virus (strain WC) GN=ORF2a PE=3 SV=1	--	--	--	--	--	--	--	--	--	--	-	-	-
Unigene37896_All	447	47	0	4.3597	0	12.09	up	1.64e-15	7.7e-14	gi|15219860|ref|NP_176303.1|	53.9	7e-07	hydroxyproline-rich glycoprotein-like protein [Arabidopsis thaliana] >gi|332195654|gb|AEE33775.1| hydroxyproline-rich glycoprotein-like protein [Arabidopsis thaliana]	sp|Q9LK03|PERK2_ARATH	53.5	5e-07	Proline-rich receptor-like protein kinase PERK2 OS=Arabidopsis thaliana GN=PERK2 PE=2 SV=3	--	--	--	--	--	K12825	5e-07	50.8	ppp:PHYPADRAFT_139325	splicing factor 3A subunit 1	-	-	-
Unigene81645_All	373	38	0	4.2242	0	12.0445	up	1.11e-12	4.08e-11	gi|115187479|gb|ABI84255.1|	96.7	8e-20	translationally controlled tumor-like protein [Arachis hypogaea]	sp|Q4IJT5|TCTP_GIBZE	178	8e-45	Translationally-controlled tumor protein homolog OS=Gibberella zeae (strain PH-1 / FGSC 9075 / NRRL 31084) GN=FG02523 PE=3 SV=1	--	--	--	--	--	--	--	--	--	--	-	-	-
Unigene81310_All	432	44	0	4.2232	0	12.0441	up	1.44e-14	6.32e-13	gi|302835147|ref|XP_002949135.1|	207	4e-53	component of cytosolic 80S ribosome and 40S small subunit [Volvox carteri f. nagariensis] >gi|300265437|gb|EFJ49628.1| component of cytosolic 80S ribosome and 40S small subunit [Volvox carteri f. nagariensis]	sp|C7YTD6|RS3A_NECH7	272	4e-73	40S ribosomal protein S1 OS=Nectria haematococca (strain 77-13-4 / FGSC 9596 / MPVI) GN=RPS1 PE=3 SV=1	YML063w	233	1e-61	COG1890	Ribosomal protein S3AE	K02984	4e-54	207	cre:CHLREDRAFT_168484	small subunit ribosomal protein S3Ae	GO:0010467//gene expression	GO:0005198//structural molecule activity	GO:0030529//ribonucleoprotein complex
Unigene81296_All	256	26	0	4.2112	0	12.04	up	6.53e-09	1.6e-07	--	--	--	--	--	--	--	--	--	--	--	--	--	--	--	--	--	--	-	-	-
Unigene38775_All	484	49	0	4.1978	0	12.0354	up	3.86e-16	1.9e-14	--	--	--	--	--	--	--	--	--	--	--	--	--	--	--	--	--	--	-	-	-
Unigene66211_All	277	28	0	4.1913	0	12.0332	up	1.54e-09	4.06e-08	--	--	--	--	--	--	--	--	--	--	--	--	--	--	--	--	--	--	-	-	-
Unigene66549_All	478	48	0	4.1637	0	12.0237	up	7.95e-16	3.83e-14	gi|76262498|gb|ABA41399.1|	105	2e-22	pherophorin-C1 protein precursor [Chlamydomonas reinhardtii]	sp|Q9FFW5|PERK8_ARATH	97.1	4e-20	Proline-rich receptor-like protein kinase PERK8 OS=Arabidopsis thaliana GN=PERK8 PE=1 SV=1	Rv3876	69.3	3e-12	COG0455	ATPases involved in chromosome partitioning	--	--	--	--	--	-	-	-
Unigene75584_All	223	22	0	4.0906	0	11.9981	up	1.18e-07	2.39e-06	--	--	--	--	--	--	--	--	--	--	--	--	--	--	--	--	--	--	-	-	-
Unigene52248_All	488	46	0	3.9085	0	11.9324	up	3.38e-15	1.55e-13	gi|435039|gb|AAA79360.1|	71.2	5e-12	proline-rich cell wall protein [Gossypium hirsutum]	sp|Q8NIN9|HYP1_DAVTA	159	8e-39	Hydrophobin-1 OS=Davidiella tassiana GN=HCh-1 PE=1 SV=1	slr0744	61.2	8e-10	COG0532	Translation initiation factor 2 (IF-2; GTPase)	--	--	--	--	--	-	GO:0003824//catalytic activity	-
Unigene104654_All	213	20	0	3.8933	0	11.9268	up	5.02e-07	9.11e-06	--	--	--	--	--	--	--	--	--	--	--	--	--	--	--	--	--	--	-	-	-
Unigene81087_All	878	82	0	3.8725	0	11.919	up	1.64e-26	1.4e-24	gi|7248459|gb|AAF43497.1|AF134579_1	66.2	5e-10	arabinogalactan protein [Zea mays]	sp|P02840|SGS3_DROME	67.4	1e-10	Salivary glue protein Sgs-3 OS=Drosophila melanogaster GN=Sgs3 PE=2 SV=1	DRA0210	54.3	3e-07	COG0747	ABC-type dipeptide transport system, periplasmic component	--	--	--	--	--	-	-	-
Unigene81208_All	290	27	0	3.8604	0	11.9145	up	3.17e-09	8.05e-08	--	--	--	--	sp|P03598|CAPSD_TOBSV	84.7	2e-16	Capsid protein OS=Tobacco streak virus (strain WC) GN=ORF3b PE=3 SV=1	--	--	--	--	--	--	--	--	--	--	-	-	-
Unigene65383_All	1150	107	0	3.8579	0	11.9136	up	2.28e-34	2.65e-32	gi|238480901|ref|NP_001154263.1|	127	3e-28	bifunctional inhibitor/lipid-transfer protein/seed storage 2S albumin-like protein [Arabidopsis thaliana] >gi|332659213|gb|AEE84613.1| bifunctional inhibitor/lipid-transfer protein/seed storage 2S albumin-like protein [Arabidopsis thaliana]	sp|Q4WMR0|FAEB2_ASPFU	293	1e-78	Probable feruloyl esterase B-2 OS=Neosartorya fumigata (strain ATCC MYA-4609 / Af293 / CBS 101355 / FGSC A1100) GN=faeB-2 PE=3 SV=1	SPBC28F2.12	85.9	1e-16	COG0086	DNA-directed RNA polymerase, beta' subunit/160 kD subunit	K03006	1e-18	92	vvi:100264310	DNA-directed RNA polymerase II subunit A [EC:2.7.7.6]	-	-	-
Unigene86140_All	200	18	0	3.7317	0	11.8656	up	2.14e-06	3.42e-05	--	--	--	--	--	--	--	--	--	--	--	--	--	--	--	--	--	--	-	-	-
Unigene88623_All	271	24	0	3.6721	0	11.8424	up	2.78e-08	6.19e-07	--	--	--	--	--	--	--	--	--	--	--	--	--	--	--	--	--	--	-	-	-
Unigene82742_All	319	28	0	3.6394	0	11.8295	up	1.54e-09	4.06e-08	gi|575427|gb|AAA53173.1|	107	6e-23	similar to S. cerevisiae PTR2 gene, GenBank Accession Number L11994 [Arabidopsis thaliana]	sp|P32901|PTR2_YEAST	119	4e-27	Peptide transporter PTR2 OS=Saccharomyces cerevisiae (strain ATCC 204508 / S288c) GN=PTR2 PE=1 SV=2	YKR093w	119	1e-27	COG3104	Dipeptide/tripeptide permease	K03305	8e-10	59.3	ppp:PHYPADRAFT_183911	proton-dependent oligopeptide transporter, POT family	-	-	-
Unigene87724_All	240	21	0	3.6281	0	11.825	up	2.44e-07	4.67e-06	gi|134920|sp|P21997.1|SSGP_VOLCA	66.2	1e-10	RecName: Full=Sulfated surface glycoprotein 185; Short=SSG 185; Flags: Precursor >gi|1405821|emb|CAA35953.1| SULFATED SURFACE GLYCOPROTEIN 185 [Volvox carteri]	sp|P21997|SSGP_VOLCA	66.2	6e-11	Sulfated surface glycoprotein 185 OS=Volvox carteri PE=1 SV=1	--	--	--	--	--	--	--	--	--	--	-	-	-
Unigene80768_All	597	52	0	3.6116	0	11.8184	up	4.4e-17	2.32e-15	gi|435039|gb|AAA79360.1|	67	2e-10	proline-rich cell wall protein [Gossypium hirsutum]	sp|Q8NIN9|HYP1_DAVTA	163	7e-40	Hydrophobin-1 OS=Davidiella tassiana GN=HCh-1 PE=1 SV=1	slr0744	51.6	9e-07	COG0532	Translation initiation factor 2 (IF-2; GTPase)	--	--	--	--	--	-	GO:0003824//catalytic activity	-
Unigene66668_All	382	33	0	3.5819	0	11.8065	up	4.12e-11	1.31e-09	--	--	--	--	--	--	--	--	--	--	--	--	--	--	--	--	--	--	-	-	-
Unigene81262_All	262	22	0	3.4817	0	11.7656	up	1.18e-07	2.39e-06	--	--	--	--	--	--	--	--	--	--	--	--	--	--	--	--	--	--	-	-	-
Unigene87761_All	203	17	0	3.4723	0	11.7617	up	4.4e-06	6.59e-05	--	--	--	--	--	--	--	--	--	--	--	--	--	--	--	--	--	--	-	-	-
Unigene87430_All	204	17	0	3.4553	0	11.7546	up	4.4e-06	6.6e-05	--	--	--	--	--	--	--	--	--	--	--	--	--	--	--	--	--	--	-	-	-
Unigene36870_All	608	50	0	3.4098	0	11.7355	up	1.87e-16	9.4e-15	--	--	--	--	--	--	--	--	--	--	--	--	--	--	--	--	--	--	-	-	-
Unigene37288_All	353	29	0	3.4064	0	11.734	up	7.45e-10	2.05e-08	--	--	--	--	--	--	--	--	--	--	--	--	--	--	--	--	--	--	-	-	-
Unigene24033_All	416	34	0	3.3889	0	11.7266	up	2e-11	6.56e-10	gi|33772157|gb|AAQ54515.1|	79.7	1e-14	alcohol dehydrogenase [Malus x domestica]	sp|Q08632|SDR1_PICAB	79.3	7e-15	Short-chain type dehydrogenase/reductase OS=Picea abies PE=2 SV=1	mll1981	84	7e-17	COG1028	Dehydrogenases with different specificities (related to short-chain alcohol dehydrogenases)	K00059	3e-17	84.7	vvi:100246875	3-oxoacyl-[acyl-carrier protein] reductase [EC:1.1.1.100]	GO:0010035//response to inorganic substance	GO:0003824//catalytic activity	-
Unigene10094_All	226	18	0	3.3024	0	11.6893	up	2.14e-06	3.43e-05	--	--	--	--	--	--	--	--	--	--	--	--	--	--	--	--	--	--	-	-	-
Unigene87003_All	253	20	0	3.2778	0	11.6785	up	5.02e-07	9.08e-06	--	--	--	--	--	--	--	--	--	--	--	--	--	--	--	--	--	--	-	-	-
Unigene39721_All	330	26	0	3.2668	0	11.6737	up	6.53e-09	1.6e-07	--	--	--	--	--	--	--	--	--	--	--	--	--	--	--	--	--	--	-	-	-
Unigene87392_All	230	18	0	3.245	0	11.664	up	2.14e-06	3.42e-05	--	--	--	--	--	--	--	--	--	--	--	--	--	--	--	--	--	--	-	-	-
Unigene10669_All	218	17	0	3.2334	0	11.6588	up	4.4e-06	6.62e-05	--	--	--	--	--	--	--	--	--	--	--	--	--	--	--	--	--	--	-	-	-
Unigene65270_All	297	23	0	3.211	0	11.6488	up	5.73e-08	1.22e-06	--	--	--	--	sp|P53252|PIL1_YEAST	63.2	5e-10	Sphingolipid long chain base-responsive protein PIL1 OS=Saccharomyces cerevisiae (strain ATCC 204508 / S288c) GN=PIL1 PE=1 SV=1	--	--	--	--	--	--	--	--	--	--	-	-	-
Unigene48384_All	261	20	0	3.1773	0	11.6336	up	5.02e-07	9.09e-06	--	--	--	--	--	--	--	--	--	--	--	--	--	--	--	--	--	--	-	-	-
Unigene87041_All	290	22	0	3.1455	0	11.6191	up	1.18e-07	2.39e-06	--	--	--	--	--	--	--	--	--	--	--	--	--	--	--	--	--	--	-	-	-
Unigene16695_All	225	17	0	3.1328	0	11.6132	up	4.4e-06	6.62e-05	--	--	--	--	--	--	--	--	--	--	--	--	--	--	--	--	--	--	-	-	-
Unigene87822_All	227	17	0	3.1052	0	11.6005	up	4.4e-06	6.59e-05	--	--	--	--	--	--	--	--	--	--	--	--	--	--	--	--	--	--	-	-	-
Unigene63464_All	254	19	0	3.1016	0	11.5988	up	1.04e-06	1.77e-05	gi|113032|sp|P15479.1|ACEA_RICCO	100	6e-21	RecName: Full=Isocitrate lyase; Short=ICL; Short=Isocitrase; Short=Isocitratase >gi|169707|gb|AAA53378.1| isocitrate lyase [Ricinus communis] >gi|225861|prf||1401247A isocitrate lyase	sp|Q6T267|ACEA_ASPFU	141	1e-33	Isocitrate lyase OS=Neosartorya fumigata (strain ATCC MYA-4609 / Af293 / CBS 101355 / FGSC A1100) GN=icl1 PE=3 SV=2	YER065c	99.8	1e-21	COG2224	Isocitrate lyase	K01637	3e-22	100	rcu:RCOM_1362920	isocitrate lyase [EC:4.1.3.1]	GO:0043436	GO:0005488//binding;GO:0016833//oxo-acid-lyase activity	GO:0005777//peroxisome
Unigene78956_All	321	24	0	3.1001	0	11.5981	up	2.78e-08	6.2e-07	--	--	--	--	--	--	--	--	--	--	--	--	--	--	--	--	--	--	-	-	-
Unigene88581_All	284	21	0	3.066	0	11.5821	up	2.44e-07	4.67e-06	--	--	--	--	--	--	--	--	--	--	--	--	--	--	--	--	--	--	-	-	-
Unigene82755_All	259	19	0	3.0417	0	11.5707	up	1.04e-06	1.77e-05	--	--	--	--	--	--	--	--	--	--	--	--	--	--	--	--	--	--	-	-	-
Unigene53152_All	369	27	0	3.0339	0	11.567	up	3.17e-09	8.06e-08	gi|238480901|ref|NP_001154263.1|	66.6	9e-11	bifunctional inhibitor/lipid-transfer protein/seed storage 2S albumin-like protein [Arabidopsis thaliana] >gi|332659213|gb|AEE84613.1| bifunctional inhibitor/lipid-transfer protein/seed storage 2S albumin-like protein [Arabidopsis thaliana]	sp|P22151|GRG1_NEUCR	68.2	2e-11	Glucose-repressible gene protein OS=Neurospora crassa GN=grg-1 PE=2 SV=1	Rv3876	52.8	2e-07	COG0455	ATPases involved in chromosome partitioning	--	--	--	--	--	-	-	GO:0044464//cell part
Unigene26584_All	548	40	0	3.0265	0	11.5634	up	2.6e-13	1.02e-11	--	--	--	--	sp|P89679|2B_TOBSV	206	1e-52	Protein 2b OS=Tobacco streak virus (strain WC) GN=ORF2b PE=3 SV=1	--	--	--	--	--	--	--	--	--	--	-	-	-
Unigene11793_All	234	17	0	3.0123	0	11.5566	up	4.4e-06	6.62e-05	--	--	--	--	--	--	--	--	--	--	--	--	--	--	--	--	--	--	-	-	-
Unigene23593_All	304	22	0	3.0007	0	11.5511	up	1.18e-07	2.39e-06	--	--	--	--	--	--	--	--	--	--	--	--	--	--	--	--	--	--	-	-	-
Unigene50871_All	332	24	0	2.9974	0	11.5495	up	2.78e-08	6.2e-07	--	--	--	--	--	--	--	--	--	--	--	--	--	--	--	--	--	--	-	-	-
Unigene87460_All	277	20	0	2.9938	0	11.5478	up	5.02e-07	9.08e-06	gi|109675118|gb|ABG37021.1|	115	2e-25	aspartic protease [Nicotiana tabacum]	sp|O42630|CARP_ASPFU	147	2e-35	Vacuolar protease A OS=Neosartorya fumigata (strain ATCC MYA-4609 / Af293 / CBS 101355 / FGSC A1100) GN=pep2 PE=2 SV=1	--	--	--	--	--	K08245	3e-28	120	ppp:PHYPADRAFT_186425	phytepsin [EC:3.4.23.40]	-	-	-
Unigene81623_All	222	16	0	2.9884	0	11.5452	up	9.08e-06	0.000127	gi|13431949|sp|Q9M4S8.1|TPIC_FRAAN	57	7e-08	RecName: Full=Triosephosphate isomerase, chloroplastic; Short=TIM; Short=Triose-phosphate isomerase; Flags: Precursor >gi|7650502|gb|AAF66071.1|AF257322_1 triosephosphate isomerase [Fragaria x ananassa]	sp|Q96VN5|TPIS_PARBA	73.9	3e-13	Triosephosphate isomerase OS=Paracoccidioides brasiliensis (strain ATCC MYA-826 / Pb01) GN=TPI1 PE=1 SV=3	YDR050c	63.9	7e-11	COG0149	Triosephosphate isomerase	K01803	5e-10	60.1	ppp:PHYPADRAFT_58449	triosephosphate isomerase (TIM) [EC:5.3.1.1]	-	-	-
Unigene51594_All	445	32	0	2.9817	0	11.5419	up	8.5e-11	2.61e-09	--	--	--	--	--	--	--	--	--	--	--	--	--	--	--	--	--	--	-	-	-
Unigene86117_All	334	24	0	2.9794	0	11.5408	up	2.78e-08	6.19e-07	gi|186512422|ref|NP_001078427.2|	52	2e-06	bifunctional inhibitor/lipid-transfer protein/seed storage 2S albumin-like protein [Arabidopsis thaliana] >gi|332659211|gb|AEE84611.1| bifunctional inhibitor/lipid-transfer protein/seed storage 2S albumin-like protein [Arabidopsis thaliana]	sp|P11734|CU08_LOCMI	62	1e-09	Cuticle protein 8 OS=Locusta migratoria PE=1 SV=1	--	--	--	--	--	--	--	--	--	--	-	-	-
Unigene20018_All	223	16	0	2.975	0	11.5387	up	9.08e-06	0.000128	--	--	--	--	--	--	--	--	--	--	--	--	--	--	--	--	--	--	-	-	-
Unigene87817_All	265	19	0	2.9729	0	11.5377	up	1.04e-06	1.77e-05	gi|301100569|ref|XP_002899374.1|	53.9	6e-07	elicitin-like protein [Phytophthora infestans T30-4] >gi|262104018|gb|EEY62070.1| elicitin-like protein [Phytophthora infestans T30-4]	sp|Q8J0P4|CRF1_ASPFU	48.9	1e-05	Probable glycosidase crf1 OS=Neosartorya fumigata (strain ATCC MYA-4609 / Af293 / CBS 101355 / FGSC A1100) GN=crf1 PE=1 SV=2	--	--	--	--	--	K09699	1e-06	48.9	osa:4327289	2-oxoisovalerate dehydrogenase E2 component (dihydrolipoyl transacylase) [EC:2.3.1.168]	-	-	-
Unigene78598_All	489	35	0	2.9677	0	11.5351	up	9.69e-12	3.28e-10	gi|226508688|ref|NP_001148076.1|	103	1e-21	LOC100281684 [Zea mays] >gi|195615664|gb|ACG29662.1| receptor protein kinase PERK1 [Zea mays]	sp|Q9FPQ6|GP1_CHLRE	90.5	4e-18	Vegetative cell wall protein gp1 OS=Chlamydomonas reinhardtii GN=GP1 PE=2 SV=1	YPO2725	70.1	2e-12	COG3501	Uncharacterized protein conserved in bacteria	--	--	--	--	--	-	GO:0003824//catalytic activity	-
Unigene89370_All	254	18	0	2.9384	0	11.5208	up	2.14e-06	3.41e-05	--	--	--	--	--	--	--	--	--	--	--	--	--	--	--	--	--	--	-	-	-
Unigene39263_All	411	29	0	2.9257	0	11.5146	up	7.45e-10	2.05e-08	gi|325193311|emb|CCA27655.1|	81.3	3e-15	AlNc14C620G12260 [Albugo laibachii Nc14]	sp|Q5KL24|PMP3_CRYNE	103	3e-22	Plasma membrane proteolipid 3 OS=Cryptococcus neoformans GN=PMP3 PE=3 SV=1	SPBC713.11c	85.1	3e-17	COG0401	Uncharacterized homolog of Blt101	--	--	--	--	--	-	-	GO:0031224//intrinsic to membrane
Unigene88679_All	270	19	0	2.9178	0	11.5107	up	1.04e-06	1.77e-05	--	--	--	--	--	--	--	--	--	--	--	--	--	--	--	--	--	--	-	-	-
Unigene12820_All	399	28	0	2.9097	0	11.5067	up	1.54e-09	4.06e-08	--	--	--	--	--	--	--	--	--	--	--	--	--	--	--	--	--	--	-	-	-
Unigene88568_All	271	19	0	2.907	0	11.5053	up	1.04e-06	1.77e-05	--	--	--	--	--	--	--	--	--	--	--	--	--	--	--	--	--	--	-	-	-
Unigene85975_All	229	16	0	2.897	0	11.5003	up	9.08e-06	0.000127	--	--	--	--	--	--	--	--	--	--	--	--	--	--	--	--	--	--	-	-	-
Unigene81770_All	315	22	0	2.8959	0	11.4998	up	1.18e-07	2.39e-06	gi|297844300|ref|XP_002890031.1|	159	1e-38	eukaryotic translation initiation factor 5A-1 [Arabidopsis lyrata subsp. lyrata] >gi|297335873|gb|EFH66290.1| eukaryotic translation initiation factor 5A-1 [Arabidopsis lyrata subsp. lyrata]	sp|P19211|IF5A2_YEAST	177	2e-44	Eukaryotic translation initiation factor 5A-2 OS=Saccharomyces cerevisiae (strain ATCC 204508 / S288c) GN=ANB1 PE=1 SV=3	YJR047c	177	4e-45	COG0231	Translation elongation factor P (EF-P)/translation initiation factor 5A (eIF-5A)	K03263	3e-39	157	ath:AT1G13950	translation initiation factor eIF-5A	-	-	-
Unigene60380_All	703	49	0	2.8901	0	11.4969	up	3.86e-16	1.9e-14	gi|297727179|ref|NP_001175953.1|	58.9	6e-08	Os09g0532600 [Oryza sativa Japonica Group] >gi|255679083|dbj|BAH94681.1| Os09g0532600 [Oryza sativa Japonica Group]	sp|Q02817|MUC2_HUMAN	56.2	2e-07	Mucin-2 OS=Homo sapiens GN=MUC2 PE=1 SV=2	--	--	--	--	--	K03006	2e-07	53.1	cre:CHLREDRAFT_196948	DNA-directed RNA polymerase II subunit A [EC:2.7.7.6]	-	GO:0005488//binding;GO:0003824//catalytic activity	-
Unigene38620_All	336	23	0	2.8383	0	11.4708	up	5.73e-08	1.22e-06	--	--	--	--	--	--	--	--	--	--	--	--	--	--	--	--	--	--	-	-	-
Unigene12360_All	279	19	0	2.8237	0	11.4634	up	1.04e-06	1.77e-05	--	--	--	--	--	--	--	--	--	--	--	--	--	--	--	--	--	--	-	-	-
Unigene65796_All	400	27	0	2.7988	0	11.4506	up	3.17e-09	8.05e-08	--	--	--	--	--	--	--	--	--	--	--	--	--	--	--	--	--	--	-	-	-
Unigene81128_All	505	34	0	2.7916	0	11.4469	up	2e-11	6.55e-10	--	--	--	--	--	--	--	--	--	--	--	--	--	--	--	--	--	--	-	-	-
Unigene24785_All	312	21	0	2.7908	0	11.4465	up	2.44e-07	4.68e-06	--	--	--	--	--	--	--	--	--	--	--	--	--	--	--	--	--	--	-	-	-
Unigene22344_All	240	16	0	2.7642	0	11.4326	up	9.08e-06	0.000128	--	--	--	--	--	--	--	--	--	--	--	--	--	--	--	--	--	--	-	-	-
Unigene25705_All	331	22	0	2.7559	0	11.4283	up	1.18e-07	2.39e-06	--	--	--	--	sp|P34762|CON6_NEUCR	72.4	8e-13	Conidiation-specific protein 6 OS=Neurospora crassa GN=con-6 PE=2 SV=1	--	--	--	--	--	--	--	--	--	--	-	-	-
Unigene83259_All	468	31	0	2.7465	0	11.4234	up	1.75e-10	5.19e-09	--	--	--	--	--	--	--	--	--	--	--	--	--	--	--	--	--	--	-	-	-
Unigene12225_All	272	18	0	2.7439	0	11.422	up	2.14e-06	3.43e-05	--	--	--	--	--	--	--	--	--	--	--	--	--	--	--	--	--	--	-	-	-
Unigene86963_All	259	17	0	2.7216	0	11.4102	up	4.4e-06	6.6e-05	--	--	--	--	--	--	--	--	--	--	--	--	--	--	--	--	--	--	-	-	-
Unigene21862_All	505	33	0	2.7095	0	11.4038	up	4.12e-11	1.31e-09	--	--	--	--	sp|A2QLK4|FKS1_ASPNC	200	3e-51	1,3-beta-glucan synthase component FKS1 OS=Aspergillus niger (strain CBS 513.88 / FGSC A1513) GN=fksA PE=3 SV=1	--	--	--	--	--	--	--	--	--	--	-	-	-
Unigene81406_All	276	18	0	2.7042	0	11.401	up	2.14e-06	3.42e-05	--	--	--	--	--	--	--	--	--	--	--	--	--	--	--	--	--	--	-	-	-
Unigene86171_All	246	16	0	2.6968	0	11.397	up	9.08e-06	0.000127	--	--	--	--	--	--	--	--	--	--	--	--	--	--	--	--	--	--	-	-	-
Unigene23505_All	446	29	0	2.6961	0	11.3967	up	7.45e-10	2.05e-08	gi|60678627|gb|AAX33674.1|	78.6	2e-14	plus agglutinin [Chlamydomonas incerta]	sp|Q9LK03|PERK2_ARATH	72.8	8e-13	Proline-rich receptor-like protein kinase PERK2 OS=Arabidopsis thaliana GN=PERK2 PE=2 SV=3	Rv3876	54.7	6e-08	COG0455	ATPases involved in chromosome partitioning	--	--	--	--	--	-	GO:0003824//catalytic activity	-
Unigene83195_All	216	14	0	2.6875	0	11.392	up	3.86e-05	0.000462	--	--	--	--	sp|Q7KQL8|THIO_PLAF7	57.4	3e-08	Thioredoxin OS=Plasmodium falciparum (isolate 3D7) GN=PF14_0545 PE=1 SV=1	SPBC12D12.07c	50.8	6e-07	COG0526	Thiol-disulfide isomerase and thioredoxins	K03671	4e-06	47	ppp:PHYPADRAFT_185663	thioredoxin 1	-	-	-
Unigene76932_All	479	31	0	2.6835	0	11.3899	up	1.75e-10	5.19e-09	--	--	--	--	--	--	--	--	--	--	--	--	--	--	--	--	--	--	-	-	-
Unigene52390_All	326	21	0	2.671	0	11.3832	up	2.44e-07	4.67e-06	--	--	--	--	--	--	--	--	--	--	--	--	--	--	--	--	--	--	-	-	-
Unigene50952_All	466	30	0	2.6693	0	11.3822	up	3.61e-10	1.04e-08	gi|22092|emb|CAA45514.1|	61.6	4e-09	hydroxyproline-rich glycoprotein [Zea diploperennis]	sp|P22943|HSP12_YEAST	72.8	8e-13	12 kDa heat shock protein OS=Saccharomyces cerevisiae (strain ATCC 204508 / S288c) GN=HSP12 PE=1 SV=1	--	--	--	--	--	--	--	--	--	--	-	-	-
Unigene87452_All	252	16	0	2.6326	0	11.3623	up	9.08e-06	0.000127	gi|115466012|ref|NP_001056605.1|	112	1e-24	Os06g0114600 [Oryza sativa Japonica Group] >gi|113594645|dbj|BAF18519.1| Os06g0114600 [Oryza sativa Japonica Group]	sp|Q05AW9|SMG9_XENLA	59.7	5e-09	Protein SMG9 OS=Xenopus laevis GN=smg9 PE=2 SV=1	--	--	--	--	--	--	--	--	--	--	-	-	-
Unigene35176_All	205	13	0	2.6294	0	11.3605	up	7.96e-05	0.000878	--	--	--	--	--	--	--	--	--	--	--	--	--	--	--	--	--	--	-	-	-
Unigene83243_All	237	15	0	2.6243	0	11.3577	up	1.87e-05	0.000244	--	--	--	--	--	--	--	--	--	--	--	--	--	--	--	--	--	--	-	-	-
Unigene11689_All	254	16	0	2.6119	0	11.3509	up	9.08e-06	0.000128	--	--	--	--	--	--	--	--	--	--	--	--	--	--	--	--	--	--	-	-	-
Unigene86036_All	302	19	0	2.6086	0	11.3491	up	1.04e-06	1.77e-05	--	--	--	--	--	--	--	--	--	--	--	--	--	--	--	--	--	--	-	-	-
Unigene88682_All	334	21	0	2.607	0	11.3482	up	2.44e-07	4.67e-06	gi|115448719|ref|NP_001048139.1|	59.3	1e-08	Os02g0752000 [Oryza sativa Japonica Group] >gi|113537670|dbj|BAF10053.1| Os02g0752000 [Oryza sativa Japonica Group]	sp|Q10138|YAS2_SCHPO	156	3e-38	CRAL-TRIO domain-containing protein C3H8.02 OS=Schizosaccharomyces pombe (strain ATCC 38366 / 972) GN=SPAC3H8.02 PE=1 SV=1	--	--	--	--	--	--	--	--	--	--	-	-	-
Unigene87396_All	207	13	0	2.604	0	11.3465	up	7.96e-05	0.000872	--	--	--	--	--	--	--	--	--	--	--	--	--	--	--	--	--	--	-	-	-
Unigene66314_All	287	18	0	2.6005	0	11.3446	up	2.14e-06	3.42e-05	--	--	--	--	--	--	--	--	--	--	--	--	--	--	--	--	--	--	-	-	-
Unigene51353_All	336	21	0	2.5915	0	11.3396	up	2.44e-07	4.68e-06	--	--	--	--	--	--	--	--	--	--	--	--	--	--	--	--	--	--	-	-	-
Unigene132942_All	209	13	0	2.5791	0	11.3327	up	7.96e-05	0.00088	gi|255562224|ref|XP_002522120.1|	60.1	8e-09	conserved hypothetical protein [Ricinus communis] >gi|223538719|gb|EEF40320.1| conserved hypothetical protein [Ricinus communis]	--	--	--	--	--	--	--	--	--	--	--	--	--	--	-	-	-
Unigene138865_All	209	13	0	2.5791	0	11.3327	up	7.96e-05	0.000879	--	--	--	--	--	--	--	--	--	--	--	--	--	--	--	--	--	--	-	-	-
Unigene86010_All	243	15	0	2.5595	0	11.3216	up	1.87e-05	0.000244	--	--	--	--	--	--	--	--	--	--	--	--	--	--	--	--	--	--	-	-	-
Unigene86555_All	405	25	0	2.5595	0	11.3216	up	1.35e-08	3.16e-07	--	--	--	--	--	--	--	--	--	--	--	--	--	--	--	--	--	--	-	-	-
Unigene51318_All	227	14	0	2.5572	0	11.3203	up	3.86e-05	0.000462	--	--	--	--	--	--	--	--	--	--	--	--	--	--	--	--	--	--	-	-	-
Unigene74785_All	488	30	0	2.549	0	11.3157	up	3.61e-10	1.03e-08	gi|297724251|ref|NP_001174489.1|	61.2	5e-09	Os05g0516400 [Oryza sativa Japonica Group] >gi|255676490|dbj|BAH93217.1| Os05g0516400 [Oryza sativa Japonica Group]	sp|Q9LK03|PERK2_ARATH	58.2	2e-08	Proline-rich receptor-like protein kinase PERK2 OS=Arabidopsis thaliana GN=PERK2 PE=2 SV=3	--	--	--	--	--	--	--	--	--	--	-	-	-
Unigene6073_All	1717	105	0	2.5356	0	11.3081	up	9.67e-34	1.1e-31	gi|20138131|sp|Q9FPQ6.1|GP1_CHLRE	154	4e-36	RecName: Full=Vegetative cell wall protein gp1; AltName: Full=Hydroxyproline-rich glycoprotein 1; Flags: Precursor >gi|12018147|gb|AAG45420.1|AF309494_1 vegetative cell wall protein gp1 [Chlamydomonas reinhardtii]	sp|Q9FPQ6|GP1_CHLRE	154	2e-36	Vegetative cell wall protein gp1 OS=Chlamydomonas reinhardtii GN=GP1 PE=2 SV=1	YPO2725	85.5	3e-16	COG3501	Uncharacterized protein conserved in bacteria	--	--	--	--	--	-	-	-
Unigene77664_All	393	24	0	2.5321	0	11.3061	up	2.78e-08	6.2e-07	gi|125620178|gb|ABN46981.1|	68.6	2e-11	thioredoxin-dependent peroxidase [Nelumbo nucifera]	sp|Q949U7|PRX2E_ARATH	68.2	2e-11	Peroxiredoxin-2E, chloroplastic OS=Arabidopsis thaliana GN=PRXIIE PE=1 SV=2	CC3394	70.1	9e-13	COG0678	Peroxiredoxin	K03386	2e-10	62	ath:AT1G60740	peroxiredoxin (alkyl hydroperoxide reductase subunit C) [EC:1.11.1.15]	GO:0006950//response to stress	GO:0005488//binding	GO:0009536//plastid
Unigene23210_All	295	18	0	2.53	0	11.3049	up	2.14e-06	3.42e-05	--	--	--	--	--	--	--	--	--	--	--	--	--	--	--	--	--	--	-	-	-
Unigene87077_All	246	15	0	2.5283	0	11.304	up	1.87e-05	0.000244	--	--	--	--	--	--	--	--	--	--	--	--	--	--	--	--	--	--	-	-	-
Unigene65797_All	378	23	0	2.5229	0	11.3009	up	5.73e-08	1.22e-06	--	--	--	--	--	--	--	--	--	--	--	--	--	--	--	--	--	--	-	-	-
Unigene83208_All	214	13	0	2.5188	0	11.2985	up	7.96e-05	0.000875	--	--	--	--	--	--	--	--	--	--	--	--	--	--	--	--	--	--	-	-	-
Unigene84024_All	247	15	0	2.518	0	11.2981	up	1.87e-05	0.000244	--	--	--	--	--	--	--	--	--	--	--	--	--	--	--	--	--	--	-	-	-
Unigene85981_All	330	20	0	2.513	0	11.2952	up	5.02e-07	9.08e-06	--	--	--	--	sp|Q85055|RDRP_AHV2H	80.9	2e-15	RNA-directed RNA polymerase OS=Atkinsonella hypoxylon virus (isolate 2H) PE=4 SV=1	--	--	--	--	--	--	--	--	--	--	-	-	-
Unigene65988_All	529	32	0	2.5082	0	11.2924	up	8.5e-11	2.61e-09	gi|227206418|dbj|BAH57264.1|	61.6	5e-09	AT2G40070 [Arabidopsis thaliana]	sp|P98088|MUC5A_HUMAN	65.9	1e-10	Mucin-5AC (Fragments) OS=Homo sapiens GN=MUC5AC PE=1 SV=3	SPBC28F2.12	55.5	5e-08	COG0086	DNA-directed RNA polymerase, beta' subunit/160 kD subunit	K03006	2e-06	49.7	rcu:RCOM_0782880	DNA-directed RNA polymerase II subunit A [EC:2.7.7.6]	-	-	-
Unigene82427_All	249	15	0	2.4978	0	11.2864	up	1.87e-05	0.000244	--	--	--	--	--	--	--	--	--	--	--	--	--	K01051	5e-06	46.6	osa:4326549	pectinesterase [EC:3.1.1.11]	-	-	-
Unigene84122_All	249	15	0	2.4978	0	11.2864	up	1.87e-05	0.000244	--	--	--	--	--	--	--	--	--	--	--	--	--	--	--	--	--	--	-	-	-
Unigene80754_All	283	17	0	2.4908	0	11.2824	up	4.4e-06	6.6e-05	gi|293333199|ref|NP_001169065.1|	78.2	3e-14	hypothetical protein LOC100382906 [Zea mays] >gi|223974757|gb|ACN31566.1| unknown [Zea mays] >gi|223974969|gb|ACN31672.1| unknown [Zea mays]	sp|P00842|ATP9_NEUCR	66.6	4e-11	ATP synthase subunit 9, mitochondrial OS=Neurospora crassa GN=atp-9 PE=1 SV=1	--	--	--	--	--	--	--	--	--	--	-	-	-
Unigene80147_All	267	16	0	2.4847	0	11.2789	up	9.08e-06	0.000128	gi|18390902|ref|NP_563819.1|	63.9	6e-10	uncharacterized protein [Arabidopsis thaliana] >gi|15450427|gb|AAK96507.1| At1g08480/T27G7_10 [Arabidopsis thaliana] >gi|16974435|gb|AAL31221.1| At1g08480/T27G7_10 [Arabidopsis thaliana] >gi|332190176|gb|AEE28297.1| uncharacterized protein [Arabidopsis thaliana]	--	--	--	--	--	--	--	--	--	--	--	--	--	--	-	-	-
Unigene25072_All	334	20	0	2.4829	0	11.2778	up	5.02e-07	9.1e-06	--	--	--	--	--	--	--	--	--	--	--	--	--	--	--	--	--	--	-	-	-
Unigene51271_All	284	17	0	2.482	0	11.2773	up	4.4e-06	6.61e-05	--	--	--	--	--	--	--	--	--	--	--	--	--	--	--	--	--	--	-	-	-
Unigene85553_All	234	14	0	2.4807	0	11.2765	up	3.86e-05	0.000461	--	--	--	--	--	--	--	--	--	--	--	--	--	--	--	--	--	--	-	-	-
Unigene86118_All	369	22	0	2.4721	0	11.2715	up	1.18e-07	2.39e-06	--	--	--	--	sp|P22151|GRG1_NEUCR	57.4	3e-08	Glucose-repressible gene protein OS=Neurospora crassa GN=grg-1 PE=2 SV=1	--	--	--	--	--	--	--	--	--	--	-	-	-
Unigene87884_All	235	14	0	2.4702	0	11.2704	up	3.86e-05	0.00046	gi|226496980|ref|NP_001151324.1|	69.3	1e-11	mitochondrial RNA-splicing protein MRS3 [Zea mays] >gi|195645822|gb|ACG42379.1| mitochondrial RNA-splicing protein MRS3 [Zea mays]	sp|O14281|YETC_SCHPO	95.5	9e-20	Uncharacterized mitochondrial carrier C8C9.12c OS=Schizosaccharomyces pombe (strain ATCC 38366 / 972) GN=SPAC8C9.12c PE=2 SV=1	--	--	--	--	--	K03454	9e-14	72.4	cme:CMR309C	mitochondrial carrier protein, MC family	-	-	-
Unigene38530_All	538	32	0	2.4662	0	11.2681	up	8.5e-11	2.61e-09	gi|159465349|ref|XP_001690885.1|	174	4e-43	ribosomal protein L18, component of cytosolic 80S ribosome and 60S large subunit [Chlamydomonas reinhardtii] >gi|158279571|gb|EDP05331.1| ribosomal protein L18 [Chlamydomonas reinhardtii]	sp|P07279|RL18_YEAST	181	3e-45	60S ribosomal protein L18 OS=Saccharomyces cerevisiae (strain ATCC 204508 / S288c) GN=RPL18A PE=1 SV=1	YOL120c	181	8e-46	COG1727	Ribosomal protein L18E	K02883	4e-44	174	cre:CHLREDRAFT_195589	large subunit ribosomal protein L18e	-	-	GO:0005622//intracellular
Unigene51689_All	320	19	0	2.4619	0	11.2656	up	1.04e-06	1.77e-05	gi|115440075|ref|NP_001044317.1|	79.7	1e-14	Os01g0760600 [Oryza sativa Japonica Group] >gi|113533848|dbj|BAF06231.1| Os01g0760600 [Oryza sativa Japonica Group]	sp|Q55F21|AATM_DICDI	71.6	1e-12	Aspartate aminotransferase, mitochondrial OS=Dictyostelium discoideum GN=aatA PE=3 SV=1	YLR027c	70.9	5e-13	COG1448	Aspartate/tyrosine/aromatic aminotransferase	K00813	6e-16	79.7	osa:4325621	aspartate aminotransferase [EC:2.6.1.1]	GO:0009060//aerobic respiration;GO:0010260//organ senescence;GO:0009078//pyruvate family amino acid metabolic process;GO:0009066//aspartate family amino acid metabolic process	GO:0008483//transaminase activity	GO:0042579//microbody
Unigene83168_All	219	13	0	2.4613	0	11.2652	up	7.96e-05	0.000875	--	--	--	--	--	--	--	--	--	--	--	--	--	--	--	--	--	--	-	-	-
Unigene86146_All	270	16	0	2.4571	0	11.2627	up	9.08e-06	0.000127	--	--	--	--	--	--	--	--	--	--	--	--	--	--	--	--	--	--	-	-	-
Unigene86585_All	220	13	0	2.4501	0	11.2586	up	7.96e-05	0.000873	--	--	--	--	--	--	--	--	--	--	--	--	--	--	--	--	--	--	-	-	-
Unigene83165_All	237	14	0	2.4493	0	11.2582	up	3.86e-05	0.000462	--	--	--	--	--	--	--	--	--	--	--	--	--	--	--	--	--	--	-	-	-
Unigene86032_All	272	16	0	2.439	0	11.2521	up	9.08e-06	0.000127	--	--	--	--	--	--	--	--	--	--	--	--	--	--	--	--	--	--	-	-	-
Unigene87506_All	272	16	0	2.439	0	11.2521	up	9.08e-06	0.000127	--	--	--	--	--	--	--	--	--	--	--	--	--	--	--	--	--	--	-	-	-
Unigene81927_All	342	20	0	2.4248	0	11.2437	up	5.02e-07	9.08e-06	gi|145335397|ref|NP_172597.2|	124	3e-28	G-type lectin S-receptor-like serine/threonine-protein kinase [Arabidopsis thaliana] >gi|332190593|gb|AEE28714.1| G-type lectin S-receptor-like serine/threonine-protein kinase [Arabidopsis thaliana]	sp|Q9SXB4|Y1130_ARATH	124	1e-28	G-type lectin S-receptor-like serine/threonine-protein kinase At1g11300 OS=Arabidopsis thaliana GN=At1g11300 PE=2 SV=1	--	--	--	--	--	K13415	9e-15	75.9	rcu:RCOM_0478150	protein brassinosteroid insensitive 1 [EC:2.7.10.1 2.7.11.1]	-	-	-
Unigene37740_All	291	17	0	2.4223	0	11.2422	up	4.4e-06	6.62e-05	gi|145354555|ref|XP_001421547.1|	103	7e-22	Ribosomal protein S27, component of cytosolic 80S ribosome and 40S small subunit [Ostreococcus lucimarinus CCE9901] >gi|144581785|gb|ABO99840.1| Ribosomal protein S27, component of cytosolic 80S ribosome and 40S small subunit [Ostreococcus lucimarinus CCE9901]	sp|Q7RVN2|RS27_NEUCR	134	1e-31	40S ribosomal protein S27 OS=Neurospora crassa GN=rps-27 PE=3 SV=1	SPBC1685.10	114	4e-26	COG2051	Ribosomal protein S27E	K02978	4e-23	103	olu:OSTLU_40438	small subunit ribosomal protein S27e	-	-	-
Unigene90141_All	274	16	0	2.4212	0	11.2415	up	9.08e-06	0.000127	gi|32400967|gb|AAP80689.1|	124	5e-28	polyubiquitin [Griffithsia japonica]	sp|P0CG63|UBI4P_YEAST	120	3e-27	Polyubiquitin OS=Saccharomyces cerevisiae (strain ATCC 204508 / S288c) GN=UBI4 PE=1 SV=1	YLL039c	120	6e-28	COG5272	Ubiquitin	K02977	7e-28	119	ppp:PHYPADRAFT_182330	small subunit ribosomal protein S27Ae	GO:0010467//gene expression	GO:0005198//structural molecule activity	GO:0030529//ribonucleoprotein complex
Unigene87067_All	257	15	0	2.4201	0	11.2409	up	1.87e-05	0.000244	--	--	--	--	sp|A1CRJ0|XGEA_ASPCL	49.7	6e-06	Probable xyloglucan-specific endo-beta-1,4-glucanase A OS=Aspergillus clavatus (strain ATCC 1007 / CBS 513.65 / DSM 816 / NCTC 3887 / NRRL 1) GN=xgeA PE=3 SV=1	--	--	--	--	--	--	--	--	--	--	-	-	-
Unigene85913_All	223	13	0	2.4172	0	11.2391	up	7.96e-05	0.000874	--	--	--	--	--	--	--	--	--	--	--	--	--	--	--	--	--	--	-	-	-
Unigene83162_All	310	18	0	2.4076	0	11.2334	up	2.14e-06	3.42e-05	gi|334185327|ref|NP_001189884.1|	67.4	5e-11	uncharacterized protein [Arabidopsis thaliana] >gi|292630758|sp|C4B8C4.1|EPFL3_ARATH RecName: Full=EPIDERMAL PATTERNING FACTOR-like protein 3; Short=EPF-like protein 3; Flags: Precursor >gi|237512859|dbj|BAH58782.1| EPFL3 [Arabidopsis thaliana] >gi|332641914|gb|AEE75435.1| uncharacterized protein [Arabidopsis thaliana]	sp|C4B8C4|EPFL3_ARATH	67.4	3e-11	EPIDERMAL PATTERNING FACTOR-like protein 3 OS=Arabidopsis thaliana GN=EPFL3 PE=3 SV=1	--	--	--	--	--	--	--	--	--	--	-	-	-
Unigene81223_All	293	17	0	2.4057	0	11.2322	up	4.4e-06	6.6e-05	--	--	--	--	--	--	--	--	--	--	--	--	--	--	--	--	--	--	-	-	-
Unigene65509_All	364	21	0	2.3921	0	11.2241	up	2.44e-07	4.67e-06	--	--	--	--	--	--	--	--	--	--	--	--	--	--	--	--	--	--	-	-	-
Unigene65784_All	295	17	0	2.3894	0	11.2224	up	4.4e-06	6.61e-05	--	--	--	--	--	--	--	--	--	--	--	--	--	--	--	--	--	--	-	-	-
Unigene24999_All	278	16	0	2.3864	0	11.2206	up	9.08e-06	0.000128	--	--	--	--	--	--	--	--	--	--	--	--	--	--	--	--	--	--	-	-	-
Unigene84042_All	296	17	0	2.3814	0	11.2176	up	4.4e-06	6.6e-05	gi|62899789|sp|Q8H715.1|ATG8_PHYIN	121	3e-27	RecName: Full=Autophagy-related protein 8; AltName: Full=Autophagy-related ubiquitin-like modifier ATG8; Flags: Precursor >gi|23394382|gb|AAN31480.1| microtubial binding protein [Phytophthora infestans]	sp|Q2GVL1|ATG8_CHAGB	145	8e-35	Autophagy-related protein 8 OS=Chaetomium globosum GN=ATG8 PE=3 SV=1	--	--	--	--	--	K08341	1e-26	115	ppp:PHYPADRAFT_193990	GABA(A) receptor-associated protein (autophagy-related protein 8)	GO:0006810//transport;GO:0044248//cellular catabolic process	GO:0015631//tubulin binding	GO:0030659//cytoplasmic vesicle membrane;GO:0005774//vacuolar membrane
Unigene84229_All	297	17	0	2.3733	0	11.2127	up	4.4e-06	6.6e-05	gi|28193496|emb|CAD28610.1|	66.2	1e-10	60S ribosomal protein L13 [Polytomella sp. Pringsheim 198.80]	sp|P41123|RL13_RAT	80.9	2e-15	60S ribosomal protein L13 OS=Rattus norvegicus GN=Rpl13 PE=1 SV=2	YDL082w	62.4	2e-10	COG4352	Ribosomal protein L13E	K02873	3e-11	64.3	ppp:PHYPADRAFT_227920	large subunit ribosomal protein L13e	-	-	-
Unigene12652_All	385	22	0	2.3694	0	11.2103	up	1.18e-07	2.39e-06	--	--	--	--	--	--	--	--	--	--	--	--	--	--	--	--	--	--	-	-	-
Unigene84258_All	228	13	0	2.3642	0	11.2071	up	7.96e-05	0.000874	--	--	--	--	--	--	--	--	--	--	--	--	--	--	--	--	--	--	-	-	-
Unigene85141_All	667	38	0	2.3622	0	11.2059	up	1.11e-12	4.08e-11	gi|51969558|dbj|BAD43471.1|	63.2	3e-09	histone-H4-like protein [Arabidopsis thaliana]	sp|Q8TFG9|YL61_SCHPO	49.3	1e-09	Uncharacterized serine/threonine-rich protein PB15E9.01c OS=Schizosaccharomyces pombe (strain ATCC 38366 / 972) GN=SPAPB15E9.01c PE=2 SV=2	XF0818	48.9	7e-06	COG2730	Endoglucanase	--	--	--	--	--	-	GO:0005488//binding	-
Unigene83051_All	264	15	0	2.3559	0	11.2021	up	1.87e-05	0.000244	--	--	--	--	--	--	--	--	--	--	--	--	--	--	--	--	--	--	-	-	-
Unigene86600_All	336	19	0	2.3447	0	11.1952	up	1.04e-06	1.77e-05	--	--	--	--	--	--	--	--	--	--	--	--	--	--	--	--	--	--	-	-	-
Unigene38448_All	301	17	0	2.3418	0	11.1934	up	4.4e-06	6.61e-05	--	--	--	--	--	--	--	--	--	--	--	--	--	--	--	--	--	--	-	-	-
Unigene85629_All	337	19	0	2.3377	0	11.1909	up	1.04e-06	1.77e-05	--	--	--	--	--	--	--	--	--	--	--	--	--	--	--	--	--	--	-	-	-
Unigene12869_All	284	16	0	2.336	0	11.1898	up	9.08e-06	0.000128	--	--	--	--	--	--	--	--	--	--	--	--	--	--	--	--	--	--	-	-	-
Unigene87503_All	515	29	0	2.3348	0	11.1891	up	7.45e-10	2.05e-08	--	--	--	--	--	--	--	--	--	--	--	--	--	--	--	--	--	--	-	-	-
Unigene87474_All	622	35	0	2.3332	0	11.1881	up	9.69e-12	3.27e-10	--	--	--	--	sp|P89678|RDRP_TOBSV	223	6e-58	RNA-directed RNA polymerase 2a OS=Tobacco streak virus (strain WC) GN=ORF2a PE=3 SV=1	--	--	--	--	--	--	--	--	--	--	-	-	-
Unigene84026_All	498	28	0	2.3313	0	11.1869	up	1.54e-09	4.06e-08	--	--	--	--	--	--	--	--	--	--	--	--	--	--	--	--	--	--	-	-	-
Unigene81295_All	427	24	0	2.3305	0	11.1864	up	2.78e-08	6.2e-07	--	--	--	--	--	--	--	--	--	--	--	--	--	--	--	--	--	--	-	-	-
Unigene87040_All	321	18	0	2.3251	0	11.1831	up	2.14e-06	3.42e-05	gi|22092|emb|CAA45514.1|	58.9	2e-08	hydroxyproline-rich glycoprotein [Zea diploperennis]	sp|P14918|EXTN_MAIZE	56.6	5e-08	Extensin OS=Zea mays GN=HRGP PE=2 SV=1	--	--	--	--	--	--	--	--	--	--	-	-	-
Unigene87100_All	232	13	0	2.3234	0	11.182	up	7.96e-05	0.000873	--	--	--	--	--	--	--	--	--	--	--	--	--	--	--	--	--	--	-	-	-
Unigene79308_All	357	20	0	2.3229	0	11.1817	up	5.02e-07	9.08e-06	--	--	--	--	--	--	--	--	--	--	--	--	--	--	--	--	--	--	-	-	-
Unigene66135_All	342	19	0	2.3035	0	11.1696	up	1.04e-06	1.77e-05	--	--	--	--	--	--	--	--	--	--	--	--	--	--	--	--	--	--	-	-	-
Unigene61783_All	308	17	0	2.2886	0	11.1602	up	4.4e-06	6.61e-05	--	--	--	--	--	--	--	--	--	--	--	--	--	--	--	--	--	--	-	-	-
Unigene87147_All	290	16	0	2.2877	0	11.1597	up	9.08e-06	0.000127	--	--	--	--	--	--	--	--	--	--	--	--	--	--	--	--	--	--	-	-	-
Unigene50387_All	417	23	0	2.287	0	11.1592	up	5.73e-08	1.22e-06	--	--	--	--	--	--	--	--	--	--	--	--	--	--	--	--	--	--	-	-	-
Unigene133616_All	256	14	0	2.2675	0	11.1469	up	3.86e-05	0.000464	--	--	--	--	--	--	--	--	--	--	--	--	--	--	--	--	--	--	-	-	-
Unigene83228_All	238	13	0	2.2648	0	11.1452	up	7.96e-05	0.000875	--	--	--	--	--	--	--	--	--	--	--	--	--	--	--	--	--	--	-	-	-
Unigene50736_All	532	29	0	2.2602	0	11.1422	up	7.45e-10	2.05e-08	gi|307109023|gb|EFN57262.1|	53.5	1e-06	expressed protein [Chlorella variabilis]	sp|P08640|MUC1_YEAST	53.1	1e-06	Flocculation protein FLO11 OS=Saccharomyces cerevisiae (strain ATCC 204508 / S288c) GN=MUC1 PE=1 SV=2	PAE3650	48.5	6e-06	COG2512	Uncharacterized membrane-associated protein/domain	--	--	--	--	--	-	-	-
Unigene84125_All	257	14	0	2.2587	0	11.1413	up	3.86e-05	0.000461	--	--	--	--	sp|Q4WY82|PPOC_ASPFU	108	1e-23	Psi-producing oxygenase C OS=Neosartorya fumigata (strain ATCC MYA-4609 / Af293 / CBS 101355 / FGSC A1100) GN=ppoC PE=1 SV=2	--	--	--	--	--	--	--	--	--	--	-	-	-
Unigene87141_All	276	15	0	2.2535	0	11.138	up	1.87e-05	0.000244	--	--	--	--	--	--	--	--	--	--	--	--	--	--	--	--	--	--	-	-	-
Unigene75027_All	313	17	0	2.252	0	11.137	up	4.4e-06	6.6e-05	--	--	--	--	--	--	--	--	--	--	--	--	--	--	--	--	--	--	-	-	-
Unigene46501_All	700	38	0	2.2509	0	11.1363	up	1.11e-12	4.08e-11	--	--	--	--	sp|O74882|SDH3_SCHPO	106	1e-22	Succinate dehydrogenase cytochrome B subunit, mitochondrial OS=Schizosaccharomyces pombe (strain ATCC 38366 / 972) GN=sdh3 PE=2 SV=1	SPCC330.12c	106	3e-23	COG2009	Succinate dehydrogenase/fumarate reductase, cytochrome b subunit	--	--	--	--	--	-	-	-
Unigene88571_All	352	19	0	2.2381	0	11.1281	up	1.04e-06	1.77e-05	gi|317373528|sp|Q9LK03.3|PERK2_ARATH	58.5	2e-08	RecName: Full=Proline-rich receptor-like protein kinase PERK2; AltName: Full=Proline-rich extensin-like receptor kinase 2; Short=AtPERK2; AltName: Full=Somatic embryogenesis receptor kinase-like protein	sp|Q9LK03|PERK2_ARATH	58.5	1e-08	Proline-rich receptor-like protein kinase PERK2 OS=Arabidopsis thaliana GN=PERK2 PE=2 SV=3	--	--	--	--	--	--	--	--	--	--	-	-	-
Unigene37108_All	297	16	0	2.2337	0	11.1252	up	9.08e-06	0.000128	--	--	--	--	--	--	--	--	--	--	--	--	--	--	--	--	--	--	-	-	-
Unigene84052_All	297	16	0	2.2337	0	11.1252	up	9.08e-06	0.000127	--	--	--	--	sp|P10713|CON10_NEUCR	58.2	2e-08	Conidiation-specific protein 10 OS=Neurospora crassa GN=con-10 PE=2 SV=1	--	--	--	--	--	--	--	--	--	--	-	-	-
Unigene84347_All	260	14	0	2.2327	0	11.1246	up	3.86e-05	0.000461	--	--	--	--	--	--	--	--	--	--	--	--	--	--	--	--	--	--	-	-	-
Unigene23775_All	298	16	0	2.2262	0	11.1204	up	9.08e-06	0.000128	--	--	--	--	--	--	--	--	--	--	--	--	--	--	--	--	--	--	-	-	-
Unigene62461_All	375	20	0	2.2114	0	11.1107	up	5.02e-07	9.08e-06	gi|159487685|ref|XP_001701853.1|	144	3e-34	nucleolar protein, component of C/D snoRNPs [Chlamydomonas reinhardtii] >gi|158281072|gb|EDP06828.1| nucleolar protein, component of C/D snoRNPs [Chlamydomonas reinhardtii]	sp|Q9HE26|FBRL_NEUCR	148	1e-35	rRNA 2'-O-methyltransferase fibrillarin OS=Neurospora crassa GN=nop-1 PE=3 SV=2	YDL014w	146	8e-36	COG1889	Fibrillarin-like rRNA methylase	--	--	--	--	--	GO:0042254//ribosome biogenesis;GO:0006399//tRNA metabolic process	GO:0016741//transferase activity, transferring one-carbon groups;GO:0003676//nucleic acid binding	-
Unigene87208_All	282	15	0	2.2055	0	11.1069	up	1.87e-05	0.000243	--	--	--	--	--	--	--	--	--	--	--	--	--	--	--	--	--	--	-	-	-
Unigene3449_All	395	21	0	2.2044	0	11.1062	up	2.44e-07	4.68e-06	gi|57472005|gb|AAW51128.1|	77.4	5e-14	minus agglutinin [Chlamydomonas incerta]	sp|Q9UTI9|YKZ2_SCHPO	83.2	5e-16	UPF0591 membrane protein C15E1.02c OS=Schizosaccharomyces pombe (strain ATCC 38366 / 972) GN=SPAC15E1.02c PE=2 SV=1	YDL140c	59.3	2e-09	COG0086	DNA-directed RNA polymerase, beta' subunit/160 kD subunit	--	--	--	--	--	-	-	-
Unigene85976_All	265	14	0	2.1905	0	11.097	up	3.86e-05	0.000461	--	--	--	--	--	--	--	--	--	--	--	--	--	--	--	--	--	--	-	-	-
Unigene78201_All	284	15	0	2.19	0	11.0967	up	1.87e-05	0.000244	--	--	--	--	sp|Q8TFG9|YL61_SCHPO	48.9	1e-05	Uncharacterized serine/threonine-rich protein PB15E9.01c OS=Schizosaccharomyces pombe (strain ATCC 38366 / 972) GN=SPAPB15E9.01c PE=2 SV=2	--	--	--	--	--	--	--	--	--	--	-	-	-
Unigene65541_All	341	18	0	2.1887	0	11.0959	up	2.14e-06	3.42e-05	--	--	--	--	--	--	--	--	--	--	--	--	--	--	--	--	--	--	-	-	-
Unigene50294_All	266	14	0	2.1823	0	11.0916	up	3.86e-05	0.000463	--	--	--	--	--	--	--	--	--	--	--	--	--	--	--	--	--	--	-	-	-
Unigene87842_All	247	13	0	2.1823	0	11.0916	up	7.96e-05	0.000872	--	--	--	--	--	--	--	--	--	--	--	--	--	--	--	--	--	--	-	-	-
Unigene83810_All	248	13	0	2.1735	0	11.0858	up	7.96e-05	0.000875	--	--	--	--	--	--	--	--	--	--	--	--	--	--	--	--	--	--	-	-	-
Unigene83901_All	249	13	0	2.1648	0	11.08	up	7.96e-05	0.000875	--	--	--	--	--	--	--	--	--	--	--	--	--	--	--	--	--	--	-	-	-
Unigene52254_All	595	31	0	2.1603	0	11.077	up	1.75e-10	5.19e-09	gi|238481456|ref|NP_001154756.1|	114	1e-24	ubiquinol-cytochrome c reductase cytochrome c1 subunit [Arabidopsis thaliana] >gi|332007215|gb|AED94598.1| ubiquinol-cytochrome c reductase cytochrome c1 subunit [Arabidopsis thaliana]	sp|P07142|CY1_NEUCR	258	2e-68	Cytochrome c1, heme protein, mitochondrial OS=Neurospora crassa GN=cyt-1 PE=2 SV=1	SPBC29A3.18	140	1e-33	COG2857	Cytochrome c1	K00413	4e-28	121	zma:100273373	ubiquinol-cytochrome c reductase cytochrome c1 subunit [EC:1.10.2.2]	-	GO:0046872//metal ion binding;GO:0009055//electron carrier activity	GO:0005746//mitochondrial respiratory chain
Unigene35424_All	269	14	0	2.158	0	11.0755	up	3.86e-05	0.000463	--	--	--	--	--	--	--	--	--	--	--	--	--	--	--	--	--	--	-	-	-
Unigene87170_All	269	14	0	2.158	0	11.0755	up	3.86e-05	0.000461	gi|159491449|ref|XP_001703679.1|	54.7	4e-07	ribosomal protein L22, component of cytosolic 80S ribosome and 60S large subunit [Chlamydomonas reinhardtii] >gi|158270587|gb|EDO96428.1| ribosomal protein L22 [Chlamydomonas reinhardtii]	sp|Q09668|RL22_SCHPO	53.9	3e-07	60S ribosomal protein L22 OS=Schizosaccharomyces pombe (strain ATCC 38366 / 972) GN=rpl22 PE=1 SV=3	--	--	--	--	--	K02891	2e-08	54.7	cre:CHLREDRAFT_195131	large subunit ribosomal protein L22e	-	-	-
Unigene19025_All	1193	62	0	2.1549	0	11.0734	up	3.16e-20	1.99e-18	gi|206570199|gb|ACI12882.1|	265	1e-69	NAD-dependent alcohol dehydrogenase [Euglena gracilis]	sp|Q9P6C8|ADH1_NEUCR	554	4e-157	Alcohol dehydrogenase 1 OS=Neurospora crassa GN=adh-1 PE=3 SV=1	YMR083w	427	2e-119	COG1064	Zn-dependent alcohol dehydrogenases	K13953	2e-151	533	zma:100274539	alcohol dehydrogenase, propanol-preferring [EC:1.1.1.1]	-	GO:0003824//catalytic activity	-
Unigene87318_All	308	16	0	2.154	0	11.0728	up	9.08e-06	0.000127	gi|133907524|gb|ABO42262.1|	79.3	1e-14	AT-hook DNA-binding protein [Gossypium hirsutum]	--	--	--	--	--	--	--	--	--	--	--	--	--	--	-	-	-
Unigene87407_All	308	16	0	2.154	0	11.0728	up	9.08e-06	0.000127	--	--	--	--	--	--	--	--	--	--	--	--	--	--	--	--	--	--	-	-	-
Unigene64937_All	270	14	0	2.15	0	11.0701	up	3.86e-05	0.000462	--	--	--	--	--	--	--	--	--	--	--	--	--	--	--	--	--	--	-	-	-
Unigene87000_All	270	14	0	2.15	0	11.0701	up	3.86e-05	0.000461	--	--	--	--	--	--	--	--	--	--	--	--	--	--	--	--	--	--	-	-	-
Unigene103273_All	251	13	0	2.1475	0	11.0684	up	7.96e-05	0.00088	gi|301096311|ref|XP_002897253.1|	54.7	4e-07	ATP-binding Cassette (ABC) Superfamily [Phytophthora infestans T30-4] >gi|262107338|gb|EEY65390.1| ATP-binding Cassette (ABC) Superfamily [Phytophthora infestans T30-4]	--	--	--	--	YMR318c	48.5	3e-06	COG1064	Zn-dependent alcohol dehydrogenases	--	--	--	--	--	GO:0006810//transport;GO:0008152//metabolic process	GO:0015405//P-P-bond-hydrolysis-driven transmembrane transporter activity;GO:0046914//transition metal ion binding;GO:0016491//oxidoreductase activity;GO:0017111//nucleoside-triphosphatase activity;GO:0032559//adenyl ribonucleotide binding	GO:0031224//intrinsic to membrane
Unigene86986_All	271	14	0	2.142	0	11.0647	up	3.86e-05	0.000461	--	--	--	--	--	--	--	--	--	--	--	--	--	--	--	--	--	--	-	-	-
Unigene85954_All	678	35	0	2.1405	0	11.0637	up	9.69e-12	3.27e-10	gi|159467537|ref|XP_001691948.1|	126	2e-28	proton/phosphate symporter, splice variant b [Chlamydomonas reinhardtii] >gi|158278675|gb|EDP04438.1| proton/phosphate symporter, splice variant b [Chlamydomonas reinhardtii]	sp|Q8H6H0|PHT16_ORYSJ	76.3	2e-13	Inorganic phosphate transporter 1-6 OS=Oryza sativa subsp. japonica GN=PHT1-6 PE=1 SV=1	TVN0123	62.8	5e-10	COG0477	Permeases of the major facilitator superfamily	K08176	8e-13	71.2	osa:4335113	MFS transporter, PHS family, inorganic phosphate transporter	-	-	-
Unigene83242_All	272	14	0	2.1342	0	11.0595	up	3.86e-05	0.000462	--	--	--	--	--	--	--	--	--	--	--	--	--	--	--	--	--	--	-	-	-
Unigene76791_All	294	15	0	2.1155	0	11.0468	up	1.87e-05	0.000244	--	--	--	--	sp|C8ZI10|RSB1_YEAS8	53.9	3e-07	Sphingoid long-chain base transporter RSB1 OS=Saccharomyces cerevisiae (strain Lalvin EC1118 / Prise de mousse) GN=RSB1 PE=2 SV=1	--	--	--	--	--	--	--	--	--	--	-	-	-
Unigene139538_All	255	13	0	2.1138	0	11.0456	up	7.96e-05	0.000879	--	--	--	--	--	--	--	--	--	--	--	--	--	--	--	--	--	--	-	-	-
Unigene87151_All	255	13	0	2.1138	0	11.0456	up	7.96e-05	0.000873	--	--	--	--	--	--	--	--	--	--	--	--	--	--	--	--	--	--	-	-	-
Unigene51847_All	334	17	0	2.1104	0	11.0433	up	4.4e-06	6.61e-05	--	--	--	--	--	--	--	--	--	--	--	--	--	--	--	--	--	--	-	-	-
Unigene51215_All	472	24	0	2.1083	0	11.0419	up	2.78e-08	6.2e-07	--	--	--	--	--	--	--	--	--	--	--	--	--	--	--	--	--	--	-	-	-
Unigene88614_All	295	15	0	2.1083	0	11.0419	up	1.87e-05	0.000243	--	--	--	--	--	--	--	--	--	--	--	--	--	--	--	--	--	--	-	-	-
Unigene85505_All	256	13	0	2.1056	0	11.04	up	7.96e-05	0.000874	--	--	--	--	--	--	--	--	--	--	--	--	--	--	--	--	--	--	-	-	-
Unigene11838_All	276	14	0	2.1032	0	11.0384	up	3.86e-05	0.000464	--	--	--	--	--	--	--	--	--	--	--	--	--	--	--	--	--	--	-	-	-
Unigene12744_All	316	16	0	2.0994	0	11.0358	up	9.08e-06	0.000128	--	--	--	--	--	--	--	--	--	--	--	--	--	--	--	--	--	--	-	-	-
Unigene21159_All	890	45	0	2.0965	0	11.0338	up	6.97e-15	3.12e-13	gi|307109023|gb|EFN57262.1|	64.7	2e-09	expressed protein [Chlorella variabilis]	sp|Q02817|MUC2_HUMAN	82.8	3e-15	Mucin-2 OS=Homo sapiens GN=MUC2 PE=1 SV=2	--	--	--	--	--	K00558	9e-06	48.5	cre:CHLREDRAFT_15852	DNA (cytosine-5-)-methyltransferase [EC:2.1.1.37]	-	-	-
Unigene86660_All	356	18	0	2.0965	0	11.0338	up	2.14e-06	3.42e-05	--	--	--	--	--	--	--	--	--	--	--	--	--	--	--	--	--	--	-	-	-
Unigene21759_All	396	20	0	2.0941	0	11.0321	up	5.02e-07	9.1e-06	--	--	--	--	--	--	--	--	--	--	--	--	--	--	--	--	--	--	-	-	-
Unigene86700_All	297	15	0	2.0941	0	11.0321	up	1.87e-05	0.000244	--	--	--	--	--	--	--	--	--	--	--	--	--	--	--	--	--	--	-	-	-
Unigene36669_All	654	33	0	2.0922	0	11.0308	up	4.12e-11	1.31e-09	gi|317373528|sp|Q9LK03.3|PERK2_ARATH	72.4	5e-12	RecName: Full=Proline-rich receptor-like protein kinase PERK2; AltName: Full=Proline-rich extensin-like receptor kinase 2; Short=AtPERK2; AltName: Full=Somatic embryogenesis receptor kinase-like protein	sp|Q9LK03|PERK2_ARATH	72.4	2e-12	Proline-rich receptor-like protein kinase PERK2 OS=Arabidopsis thaliana GN=PERK2 PE=2 SV=3	RSc0887	50.1	3e-06	COG3210	Large exoproteins involved in heme utilization or adhesion	--	--	--	--	--	-	GO:0016740//transferase activity	-
Unigene88646_All	299	15	0	2.0801	0	11.0224	up	1.87e-05	0.000243	gi|226500662|ref|NP_001147306.1|	82.8	1e-15	flavoprotein wrbA [Zea mays] >gi|195609730|gb|ACG26695.1| flavoprotein wrbA [Zea mays]	sp|P42059|CLAH7_DAVTA	132	7e-31	Minor allergen Cla h 7 OS=Davidiella tassiana GN=CLAH7 PE=1 SV=1	YCR004c	102	2e-22	COG0655	Multimeric flavodoxin WrbA	K03809	1e-16	82	ppp:PHYPADRAFT_105288	Trp repressor binding protein	-	-	GO:0016020//membrane
Unigene82085_All	479	24	0	2.0775	0	11.0206	up	2.78e-08	6.2e-07	--	--	--	--	--	--	--	--	--	--	--	--	--	--	--	--	--	--	-	-	-
Unigene138252_All	280	14	0	2.0732	0	11.0176	up	3.86e-05	0.000464	--	--	--	--	--	--	--	--	--	--	--	--	--	--	--	--	--	--	-	-	-
Unigene48500_All	280	14	0	2.0732	0	11.0176	up	3.86e-05	0.000463	--	--	--	--	--	--	--	--	--	--	--	--	--	--	--	--	--	--	-	-	-
Unigene50531_All	260	13	0	2.0732	0	11.0176	up	7.96e-05	0.000877	--	--	--	--	--	--	--	--	--	--	--	--	--	--	--	--	--	--	-	-	-
Unigene77441_All	300	15	0	2.0732	0	11.0176	up	1.87e-05	0.000244	--	--	--	--	--	--	--	--	--	--	--	--	--	--	--	--	--	--	-	-	-
Unigene97808_All	260	13	0	2.0732	0	11.0176	up	7.96e-05	0.000872	--	--	--	--	--	--	--	--	--	--	--	--	--	--	--	--	--	--	-	-	-
Unigene8318_All	321	16	0	2.0667	0	11.0131	up	9.08e-06	0.000127	gi|9758853|dbj|BAB09379.1|	77	7e-14	non-LTR retroelement reverse transcriptase-like protein [Arabidopsis thaliana]	--	--	--	--	--	--	--	--	--	--	--	--	--	--	GO:0006950//response to stress	-	GO:0009526//plastid envelope
Unigene87890_All	301	15	0	2.0663	0	11.0128	up	1.87e-05	0.000243	--	--	--	--	sp|Q5ASN8|PMP20_EMENI	73.9	3e-13	Putative peroxiredoxin pmp20 OS=Emericella nidulans GN=AN8692 PE=1 SV=1	--	--	--	--	--	--	--	--	--	--	-	-	-
Unigene83972_All	261	13	0	2.0652	0	11.0121	up	7.96e-05	0.000875	gi|308808346|ref|XP_003081483.1|	61.2	4e-09	Predicted membrane protein (patched superfamily) (ISS) [Ostreococcus tauri] >gi|116059946|emb|CAL56005.1| Predicted membrane protein (patched superfamily) (ISS) [Ostreococcus tauri]	sp|Q9LK03|PERK2_ARATH	58.2	2e-08	Proline-rich receptor-like protein kinase PERK2 OS=Arabidopsis thaliana GN=PERK2 PE=2 SV=3	YPO2725	52.8	2e-07	COG3501	Uncharacterized protein conserved in bacteria	--	--	--	--	--	-	-	-
Unigene87232_All	261	13	0	2.0652	0	11.0121	up	7.96e-05	0.000873	--	--	--	--	--	--	--	--	--	--	--	--	--	--	--	--	--	--	-	-	-
Unigene37920_All	444	22	0	2.0545	0	11.0046	up	1.18e-07	2.39e-06	--	--	--	--	--	--	--	--	--	--	--	--	--	--	--	--	--	--	-	-	-
Unigene47230_All	283	14	0	2.0512	0	11.0023	up	3.86e-05	0.000463	--	--	--	--	--	--	--	--	--	--	--	--	--	--	--	--	--	--	-	-	-
Unigene86690_All	263	13	0	2.0495	0	11.0011	up	7.96e-05	0.000873	--	--	--	--	--	--	--	--	--	--	--	--	--	--	--	--	--	--	-	-	-
Unigene86053_All	385	19	0	2.0463	0	10.9988	up	1.04e-06	1.77e-05	--	--	--	--	--	--	--	--	--	--	--	--	--	--	--	--	--	--	-	-	-
Unigene83954_All	284	14	0	2.044	0	10.9972	up	3.86e-05	0.000462	--	--	--	--	--	--	--	--	--	--	--	--	--	--	--	--	--	--	-	-	-
Unigene83276_All	264	13	0	2.0418	0	10.9956	up	7.96e-05	0.000875	gi|298205021|emb|CBI34328.3|	53.1	1e-06	unnamed protein product [Vitis vinifera] >gi|310877870|gb|ADP37166.1| putative ERD6-like transporter [Vitis vinifera]	sp|Q3ECP7|ERDL5_ARATH	49.3	8e-06	Sugar transporter ERD6-like 5 OS=Arabidopsis thaliana GN=At1g54730 PE=2 SV=2	--	--	--	--	--	--	--	--	--	--	GO:0006810//transport	-	-
Unigene87715_All	285	14	0	2.0368	0	10.9921	up	3.86e-05	0.00046	--	--	--	--	--	--	--	--	--	--	--	--	--	--	--	--	--	--	-	-	-
Unigene86654_All	286	14	0	2.0297	0	10.9871	up	3.86e-05	0.000461	--	--	--	--	--	--	--	--	--	--	--	--	--	--	--	--	--	--	-	-	-
Unigene89726_All	307	15	0	2.0259	0	10.9843	up	1.87e-05	0.000243	--	--	--	--	--	--	--	--	--	--	--	--	--	--	--	--	--	--	-	-	-
Unigene83159_All	328	16	0	2.0226	0	10.982	up	9.08e-06	0.000127	--	--	--	--	--	--	--	--	--	--	--	--	--	--	--	--	--	--	-	-	-
Unigene85802_All	308	15	0	2.0193	0	10.9796	up	1.87e-05	0.000244	--	--	--	--	--	--	--	--	--	--	--	--	--	--	--	--	--	--	-	-	-
Unigene85563_All	329	16	0	2.0165	0	10.9776	up	9.08e-06	0.000127	gi|300681406|emb|CAZ96210.1|	70.1	8e-12	NADP-dependent D-sorbitol-6-phosphate deshydrogenase [Saccharum hybrid cultivar R570]	sp|Q568L5|A1A1B_DANRE	74.3	2e-13	Alcohol dehydrogenase [NADP+] B OS=Danio rerio GN=akr1a1b PE=2 SV=1	BH2158	68.2	3e-12	COG0656	Aldo/keto reductases, related to diketogulonate reductase	K00085	1e-11	65.1	ath:AT2G21260	aldose-6-phosphate reductase (NADPH2) [EC:1.1.1.200]	-	-	-
Unigene52591_All	556	27	0	2.0135	0	10.9755	up	3.17e-09	8.06e-08	gi|301122201|ref|XP_002908827.1|	153	1e-36	mitochondrial-processing peptidase subunit beta [Phytophthora infestans T30-4] >gi|262099589|gb|EEY57641.1| mitochondrial-processing peptidase subunit beta [Phytophthora infestans T30-4]	sp|P11913|MPPB_NEUCR	311	1e-84	Mitochondrial-processing peptidase subunit beta OS=Neurospora crassa GN=pep PE=1 SV=1	SPBP23A10.15c	226	1e-59	COG0612	Predicted Zn-dependent peptidases	K01412	3e-34	142	ath:AT3G02090	mitochondrial processing peptidase [EC:3.4.24.64]	-	GO:0046914//transition metal ion binding	GO:0030312//external encapsulating structure;GO:0005746//mitochondrial respiratory chain;GO:0031981//nuclear lumen;GO:0009536//plastid
Unigene87044_All	309	15	0	2.0128	0	10.975	up	1.87e-05	0.000244	--	--	--	--	--	--	--	--	--	--	--	--	--	--	--	--	--	--	-	-	-
Unigene26215_All	268	13	0	2.0113	0	10.9739	up	7.96e-05	0.000879	--	--	--	--	--	--	--	--	--	--	--	--	--	--	--	--	--	--	-	-	-
Unigene87002_All	268	13	0	2.0113	0	10.9739	up	7.96e-05	0.000873	gi|38325813|gb|AAR17079.1|	168	2e-41	heat shock protein 70-2 [Nicotiana tabacum]	sp|Q01233|HSP70_NEUCR	149	7e-36	Heat shock 70 kDa protein OS=Neurospora crassa GN=hsps-1 PE=2 SV=2	SPAC13G7.02c	114	6e-26	COG0443	Molecular chaperone	K03283	3e-25	110	osa:4334598	heat shock 70kDa protein 1/8	-	-	-
Unigene79425_All	414	20	0	2.0031	0	10.968	up	5.02e-07	9.08e-06	--	--	--	--	--	--	--	--	--	--	--	--	--	--	--	--	--	--	-	-	-
Unigene87951_All	394	19	0	1.9995	0	10.9654	up	1.04e-06	1.77e-05	--	--	--	--	--	--	--	--	--	--	--	--	--	--	--	--	--	--	-	-	-
Unigene84181_All	270	13	0	1.9964	0	10.9632	up	7.96e-05	0.000874	--	--	--	--	--	--	--	--	--	--	--	--	--	--	--	--	--	--	-	-	-
Unigene65351_All	291	14	0	1.9948	0	10.962	up	3.86e-05	0.000462	--	--	--	--	--	--	--	--	--	--	--	--	--	--	--	--	--	--	-	-	-
Unigene85477_All	272	13	0	1.9817	0	10.9525	up	7.96e-05	0.000874	--	--	--	--	--	--	--	--	--	--	--	--	--	--	--	--	--	--	-	-	-
Unigene66293_All	335	16	0	1.9804	0	10.9516	up	9.08e-06	0.000128	--	--	--	--	sp|B2AND4|MTLD_PODAN	71.6	1e-12	Mannitol-1-phosphate 5-dehydrogenase OS=Podospora anserina GN=Pa_6_10260 PE=3 SV=1	--	--	--	--	--	K00009	4e-06	47	zma:100382636	mannitol-1-phosphate 5-dehydrogenase [EC:1.1.1.17]	-	-	-
Unigene37982_All	294	14	0	1.9745	0	10.9473	up	3.86e-05	0.000463	gi|159465489|ref|XP_001690955.1|	62.4	2e-09	aldehyde dehydrogenase [Chlamydomonas reinhardtii] >gi|158279641|gb|EDP05401.1| aldehyde dehydrogenase [Chlamydomonas reinhardtii]	sp|P40108|ALDH_DAVTA	74.7	2e-13	Aldehyde dehydrogenase OS=Davidiella tassiana GN=CLAH10 PE=1 SV=2	SPAC9E9.09c	67.8	5e-12	COG1012	NAD-dependent aldehyde dehydrogenases	K00128	1e-10	62.4	cre:CHLREDRAFT_135609	aldehyde dehydrogenase (NAD+) [EC:1.2.1.3]	GO:0008152//metabolic process	GO:0003824//catalytic activity	-
Unigene87898_All	316	15	0	1.9682	0	10.9427	up	1.87e-05	0.000243	gi|6094476|sp|O23787.1|THI4_CITSI	99	2e-20	RecName: Full=Thiazole biosynthetic enzyme, chloroplastic; Flags: Precursor >gi|2582665|emb|CAB05370.1| thi [Citrus sinensis]	sp|P23618|THI4_FUSOX	149	4e-36	Thiazole biosynthetic enzyme, mitochondrial OS=Fusarium oxysporum GN=STI35 PE=2 SV=2	SPBC26H8.01	112	1e-25	COG1635	Flavoprotein involved in thiazole biosynthesis	K03146	2e-21	98.2	ppp:PHYPADRAFT_116428	thiamine biosynthetic enzyme	-	-	-
Unigene87982_All	297	14	0	1.9545	0	10.9326	up	3.86e-05	0.00046	--	--	--	--	--	--	--	--	--	--	--	--	--	--	--	--	--	--	-	-	-
Unigene84041_All	340	16	0	1.9512	0	10.9301	up	9.08e-06	0.000127	--	--	--	--	--	--	--	--	--	--	--	--	--	--	--	--	--	--	-	-	-
Unigene86034_All	298	14	0	1.948	0	10.9278	up	3.86e-05	0.000461	--	--	--	--	--	--	--	--	--	--	--	--	--	--	--	--	--	--	-	-	-
Unigene83968_All	277	13	0	1.9459	0	10.9262	up	7.96e-05	0.000875	gi|326517435|dbj|BAK00084.1|	90.5	6e-18	predicted protein [Hordeum vulgare subsp. vulgare]	--	--	--	--	--	--	--	--	--	--	--	--	--	--	-	-	-
Unigene85876_All	320	15	0	1.9436	0	10.9245	up	1.87e-05	0.000244	gi|255073061|ref|XP_002500205.1|	53.5	8e-07	profilin [Micromonas sp. RCC299] >gi|226515467|gb|ACO61463.1| profilin [Micromonas sp. RCC299]	sp|P39825|PROF_SCHPO	70.9	2e-12	Profilin OS=Schizosaccharomyces pombe (strain ATCC 38366 / 972) GN=cdc3 PE=1 SV=1	--	--	--	--	--	K05759	5e-07	50.1	cme:CMP220C	profilin	-	-	GO:0044424//intracellular part
Unigene60061_All	427	20	0	1.9421	0	10.9234	up	5.02e-07	9.09e-06	--	--	--	--	--	--	--	--	--	--	--	--	--	--	--	--	--	--	-	-	-
Unigene84308_All	363	17	0	1.9418	0	10.9232	up	4.4e-06	6.6e-05	--	--	--	--	sp|P53279|FHN1_YEAST	52.4	9e-07	Non-classical export protein 2 homolog 1 OS=Saccharomyces cerevisiae (strain ATCC 204508 / S288c) GN=FHN1 PE=1 SV=1	--	--	--	--	--	--	--	--	--	--	-	-	-
Unigene86191_All	471	22	0	1.9367	0	10.9194	up	1.18e-07	2.39e-06	gi|18072845|emb|CAC81821.1|	115	2e-25	peroxidase [Beta vulgaris]	sp|A5H452|PER70_MAIZE	109	8e-24	Peroxidase 70 OS=Zea mays GN=PER70 PE=1 SV=1	--	--	--	--	--	K00430	5e-25	110	sbi:SORBI_02g042840	peroxidase [EC:1.11.1.7]	GO:0042743//hydrogen peroxide metabolic process;GO:0006950//response to stress	GO:0016209//antioxidant activity;GO:0005506//iron ion binding;GO:0003824//catalytic activity	-
Unigene81115_All	279	13	0	1.932	0	10.9159	up	7.96e-05	0.000876	--	--	--	--	--	--	--	--	--	--	--	--	--	--	--	--	--	--	-	-	-
Unigene82758_All	279	13	0	1.932	0	10.9159	up	7.96e-05	0.000876	--	--	--	--	--	--	--	--	--	--	--	--	--	--	--	--	--	--	-	-	-
Unigene83166_All	279	13	0	1.932	0	10.9159	up	7.96e-05	0.000875	--	--	--	--	--	--	--	--	--	--	--	--	--	--	--	--	--	--	-	-	-
Unigene87960_All	279	13	0	1.932	0	10.9159	up	7.96e-05	0.000872	--	--	--	--	--	--	--	--	--	--	--	--	--	--	--	--	--	--	-	-	-
Unigene12791_All	323	15	0	1.9256	0	10.9111	up	1.87e-05	0.000245	--	--	--	--	--	--	--	--	--	--	--	--	--	--	--	--	--	--	-	-	-
Unigene12882_All	280	13	0	1.9251	0	10.9107	up	7.96e-05	0.00088	--	--	--	--	--	--	--	--	--	--	--	--	--	--	--	--	--	--	-	-	-
Unigene83946_All	280	13	0	1.9251	0	10.9107	up	7.96e-05	0.000875	--	--	--	--	--	--	--	--	--	--	--	--	--	--	--	--	--	--	-	-	-
Unigene83988_All	388	18	0	1.9236	0	10.9096	up	2.14e-06	3.42e-05	gi|232244|sp|P30124.1|HEM2_PEA	106	8e-23	RecName: Full=Delta-aminolevulinic acid dehydratase, chloroplastic; Short=ALADH; AltName: Full=Porphobilinogen synthase; Flags: Precursor >gi|169031|gb|AAA33640.1| aminolevulinic acid dehydratase [Pisum sativum]	sp|P05373|HEM2_YEAST	174	2e-43	Delta-aminolevulinic acid dehydratase OS=Saccharomyces cerevisiae (strain ATCC 204508 / S288c) GN=HEM2 PE=1 SV=2	YGL040c	174	4e-44	COG0113	Delta-aminolevulinic acid dehydratase	K01698	1e-24	108	vvi:100264314	porphobilinogen synthase [EC:4.2.1.24]	GO:0033014//tetrapyrrole biosynthetic process	-	GO:0043231//intracellular membrane-bounded organelle
Unigene52209_All	345	16	0	1.923	0	10.9091	up	9.08e-06	0.000128	--	--	--	--	--	--	--	--	--	--	--	--	--	--	--	--	--	--	-	-	-
Unigene38879_All	281	13	0	1.9182	0	10.9055	up	7.96e-05	0.000878	gi|159468233|ref|XP_001692287.1|	96.3	1e-19	elongation factor EF-3 [Chlamydomonas reinhardtii] >gi|158278473|gb|EDP04237.1| elongation factor EF-3 [Chlamydomonas reinhardtii]	sp|P53978|EF3B_YEAST	158	1e-38	Elongation factor 3B OS=Saccharomyces cerevisiae (strain ATCC 204508 / S288c) GN=HEF3 PE=1 SV=2	YNL014w_2	158	3e-39	COG0488	ATPase components of ABC transporters with duplicated ATPase domains	K03235	6e-21	96.3	cre:CHLREDRAFT_145770	elongation factor EF-3	GO:0051276//chromosome organization	GO:0003676//nucleic acid binding;GO:0017111//nucleoside-triphosphatase activity;GO:0000166//nucleotide binding	GO:0043232
Unigene40059_All	282	13	0	1.9114	0	10.9004	up	7.96e-05	0.000878	--	--	--	--	--	--	--	--	--	--	--	--	--	--	--	--	--	--	-	-	-
Unigene88006_All	565	26	0	1.9081	0	10.8979	up	6.53e-09	1.6e-07	gi|302828408|ref|XP_002945771.1|	100	1e-20	pathogenesis-related protein 1-like protein [Volvox carteri f. nagariensis] >gi|300268586|gb|EFJ52766.1| pathogenesis-related protein 1-like protein [Volvox carteri f. nagariensis]	sp|Q9FPQ6|GP1_CHLRE	89.7	1e-17	Vegetative cell wall protein gp1 OS=Chlamydomonas reinhardtii GN=GP1 PE=2 SV=1	slr0599	58.2	9e-09	COG0515	Serine/threonine protein kinase	--	--	--	--	--	-	-	-
Unigene83203_All	392	18	0	1.9039	0	10.8947	up	2.14e-06	3.42e-05	gi|307109023|gb|EFN57262.1|	56.6	9e-08	expressed protein [Chlorella variabilis]	sp|P0C956|GEL4_ASPFU	172	6e-43	1,3-beta-glucanosyltransferase gel4 OS=Neosartorya fumigata (strain ATCC MYA-4609 / Af293 / CBS 101355 / FGSC A1100) GN=gel4 PE=3 SV=1	DRA0210	49.3	2e-06	COG0747	ABC-type dipeptide transport system, periplasmic component	--	--	--	--	--	GO:0044238//primary metabolic process	GO:0005488//binding;GO:0003824//catalytic activity	-
Unigene87707_All	306	14	0	1.897	0	10.8895	up	3.86e-05	0.00046	gi|192910720|gb|ACF06468.1|	99.4	1e-20	40S ribosomal protein S5 [Elaeis guineensis]	sp|Q7RVI1|RS5_NEUCR	135	8e-32	40S ribosomal protein S5 OS=Neurospora crassa GN=rps-5 PE=3 SV=2	YJR123w	110	5e-25	COG0049	Ribosomal protein S7	K02989	9e-23	102	rcu:RCOM_0408940	small subunit ribosomal protein S5e	-	-	-
Unigene86527_All	307	14	0	1.8909	0	10.8849	up	3.86e-05	0.000461	--	--	--	--	--	--	--	--	--	--	--	--	--	--	--	--	--	--	-	-	-
Unigene49051_All	351	16	0	1.8901	0	10.8842	up	9.08e-06	0.000128	--	--	--	--	--	--	--	--	--	--	--	--	--	--	--	--	--	--	-	-	-
Unigene20391_All	395	18	0	1.8895	0	10.8838	up	2.14e-06	3.42e-05	gi|87241403|gb|ABD33261.1|	145	2e-34	RNA-directed DNA polymerase (Reverse transcriptase) [Medicago truncatula]	sp|P08548|LIN1_NYCCO	58.2	2e-08	LINE-1 reverse transcriptase homolog OS=Nycticebus coucang PE=1 SV=1	--	--	--	--	--	K13148	1e-20	95.5	vvi:100261060	integrator complex subunit 11 [EC:3.1.27.-]	-	-	-
Unigene77328_All	395	18	0	1.8895	0	10.8838	up	2.14e-06	3.42e-05	gi|21322711|emb|CAD22154.1|	134	4e-31	pherophorin-dz1 protein [Volvox carteri f. nagariensis]	sp|P27483|GRP1_ARATH	115	6e-26	Glycine-rich cell wall structural protein OS=Arabidopsis thaliana GN=At3g17050 PE=2 SV=2	XF0818	95.9	2e-20	COG2730	Endoglucanase	--	--	--	--	--	-	-	-
Unigene88729_All	395	18	0	1.8895	0	10.8838	up	2.14e-06	3.41e-05	gi|115449585|ref|NP_001048502.1|	85.1	3e-25	Os02g0815400 [Oryza sativa Japonica Group] >gi|113538033|dbj|BAF10416.1| Os02g0815400 [Oryza sativa Japonica Group]	--	--	--	--	--	--	--	--	--	--	--	--	--	--	-	-	GO:0009534//chloroplast thylakoid
Unigene21690_All	330	15	0	1.8847	0	10.8801	up	1.87e-05	0.000244	--	--	--	--	--	--	--	--	--	--	--	--	--	--	--	--	--	--	-	-	-
Unigene82974_All	286	13	0	1.8847	0	10.8801	up	7.96e-05	0.000876	--	--	--	--	--	--	--	--	--	--	--	--	--	--	--	--	--	--	-	-	-
Unigene21719_All	376	17	0	1.8747	0	10.8724	up	4.4e-06	6.62e-05	--	--	--	--	--	--	--	--	--	--	--	--	--	--	--	--	--	--	-	-	-
Unigene85565_All	288	13	0	1.8716	0	10.8701	up	7.96e-05	0.000874	gi|301097898|ref|XP_002898043.1|	152	1e-36	heat shock 70 kDa protein, mitochondrial precursor [Phytophthora infestans T30-4] >gi|262106488|gb|EEY64540.1| heat shock 70 kDa protein, mitochondrial precursor [Phytophthora infestans T30-4]	sp|Q5B0C0|HSP7M_EMENI	181	1e-45	Heat shock 70 kDa protein OS=Emericella nidulans GN=AN6010 PE=1 SV=1	SPAC664.11	165	2e-41	COG0443	Molecular chaperone	K04043	2e-39	157	cme:CML205C	molecular chaperone DnaK	GO:0044267//cellular protein metabolic process;GO:0050896//response to stimulus	GO:0032559//adenyl ribonucleotide binding;GO:0019899//enzyme binding	-
Unigene86697_All	288	13	0	1.8716	0	10.8701	up	7.96e-05	0.000873	--	--	--	--	--	--	--	--	--	--	--	--	--	--	--	--	--	--	-	-	-
Unigene84204_All	355	16	0	1.8688	0	10.8679	up	9.08e-06	0.000127	--	--	--	--	--	--	--	--	--	--	--	--	--	--	--	--	--	--	-	-	-
Unigene83918_All	356	16	0	1.8635	0	10.8638	up	9.08e-06	0.000127	--	--	--	--	--	--	--	--	--	--	--	--	--	K03031	4e-06	47	rcu:RCOM_1312190	26S proteasome regulatory subunit N12	-	-	-
Unigene87675_All	401	18	0	1.8612	0	10.862	up	2.14e-06	3.42e-05	--	--	--	--	sp|Q01358|BLI3_NEUCR	137	2e-32	Protein bli-3 OS=Neurospora crassa GN=bli-3 PE=2 SV=1	--	--	--	--	--	--	--	--	--	--	-	-	-
Unigene38915_All	379	17	0	1.8598	0	10.8609	up	4.4e-06	6.61e-05	gi|29468088|gb|AAO22131.1|	58.2	3e-08	quinone oxidoreductase [Fragaria x ananassa]	sp|O94564|YGD6_SCHPO	95.5	9e-20	Zinc-type alcohol dehydrogenase-like protein C1773.06c OS=Schizosaccharomyces pombe (strain ATCC 38366 / 972) GN=SPBC1773.06c PE=2 SV=1	SPBC1773.06c	95.5	2e-20	COG0604	NADPH:quinone reductase and related Zn-dependent oxidoreductases	--	--	--	--	--	-	-	-
Unigene63481_All	492	22	0	1.8541	0	10.8565	up	1.18e-07	2.39e-06	--	--	--	--	--	--	--	--	--	--	--	--	--	--	--	--	--	--	-	-	-
Unigene84247_All	314	14	0	1.8487	0	10.8523	up	3.86e-05	0.000461	--	--	--	--	--	--	--	--	--	--	--	--	--	--	--	--	--	--	-	-	-
Unigene65907_All	292	13	0	1.846	0	10.8502	up	7.96e-05	0.000877	--	--	--	--	--	--	--	--	--	--	--	--	--	--	--	--	--	--	-	-	-
Unigene87158_All	337	15	0	1.8456	0	10.8499	up	1.87e-05	0.000244	--	--	--	--	--	--	--	--	--	--	--	--	--	--	--	--	--	--	-	-	-
Unigene83836_All	293	13	0	1.8397	0	10.8453	up	7.96e-05	0.000875	--	--	--	--	--	--	--	--	--	--	--	--	--	--	--	--	--	--	-	-	-
Unigene87636_All	293	13	0	1.8397	0	10.8453	up	7.96e-05	0.000872	gi|209978718|gb|ACJ04704.1|	83.6	7e-16	hexokinase 1 [Cucumis melo]	sp|P93834|HXK2_ARATH	80.1	4e-15	Hexokinase-2 OS=Arabidopsis thaliana GN=HXK2 PE=1 SV=1	--	--	--	--	--	K00844	2e-16	81.3	rcu:RCOM_1049540	hexokinase [EC:2.7.1.1]	-	-	-
Unigene85541_All	361	16	0	1.8377	0	10.8437	up	9.08e-06	0.000127	--	--	--	--	--	--	--	--	--	--	--	--	--	--	--	--	--	--	-	-	-
Unigene85966_All	474	21	0	1.837	0	10.8431	up	2.44e-07	4.67e-06	--	--	--	--	sp|P03597|MVP_TOBSV	249	5e-66	Movement protein OS=Tobacco streak virus (strain WC) GN=ORF3a PE=3 SV=1	--	--	--	--	--	--	--	--	--	--	-	-	-
Unigene64784_All	339	15	0	1.8347	0	10.8413	up	1.87e-05	0.000244	--	--	--	--	sp|P42117|NDUA3_NEUCR	119	8e-27	NADH-ubiquinone oxidoreductase 9.5 kDa subunit OS=Neurospora crassa GN=NCU00670 PE=1 SV=3	--	--	--	--	--	--	--	--	--	--	-	-	-
Unigene84068_All	407	18	0	1.8338	0	10.8406	up	2.14e-06	3.42e-05	--	--	--	--	--	--	--	--	--	--	--	--	--	--	--	--	--	--	-	-	-
Unigene87548_All	567	25	0	1.8282	0	10.8362	up	1.35e-08	3.16e-07	gi|226501984|ref|NP_001152161.1|	79.3	3e-14	cat eye syndrome critical region protein 5 [Zea mays] >gi|195653355|gb|ACG46145.1| cat eye syndrome critical region protein 5 precursor [Zea mays]	sp|P36151|YK50_YEAST	82.4	2e-15	Uncharacterized protein YKR070W OS=Saccharomyces cerevisiae (strain ATCC 204508 / S288c) GN=YKR070W PE=1 SV=1	YKR070w	82.4	4e-16	COG0647	Predicted sugar phosphatases of the HAD superfamily	--	--	--	--	--	-	-	-
Unigene86356_All	295	13	0	1.8272	0	10.8354	up	7.96e-05	0.000873	gi|113734309|dbj|BAF30480.1|	52.8	1e-06	cytochrome c oxidase subunit Vb [Pisum sativum]	sp|P06809|COX4_NEUCR	160	2e-39	Cytochrome c oxidase subunit 4, mitochondrial OS=Neurospora crassa GN=cox-4 PE=3 SV=2	--	--	--	--	--	K02265	4e-49	189	zma:100382668	cytochrome c oxidase subunit Vb [EC:1.9.3.1]	-	GO:0046914//transition metal ion binding;GO:0015002//heme-copper terminal oxidase activity	GO:0031967;GO:0043231//intracellular membrane-bounded organelle;GO:0044444//cytoplasmic part
Unigene61839_All	409	18	0	1.8248	0	10.8335	up	2.14e-06	3.42e-05	--	--	--	--	--	--	--	--	--	--	--	--	--	--	--	--	--	--	-	-	-
Unigene85952_All	546	24	0	1.8226	0	10.8318	up	2.78e-08	6.2e-07	gi|575427|gb|AAA53173.1|	181	6e-45	similar to S. cerevisiae PTR2 gene, GenBank Accession Number L11994 [Arabidopsis thaliana]	sp|Q9P380|PTR2_SCHPO	181	3e-45	Probable peptide transporter ptr2 OS=Schizosaccharomyces pombe (strain ATCC 38366 / 972) GN=ptr2 PE=1 SV=1	SPBC13A2.04c	181	7e-46	COG3104	Dipeptide/tripeptide permease	K03305	8e-15	77.4	ppp:PHYPADRAFT_183911	proton-dependent oligopeptide transporter, POT family	-	-	-
Unigene24915_All	296	13	0	1.821	0	10.8305	up	7.96e-05	0.000879	--	--	--	--	--	--	--	--	--	--	--	--	--	--	--	--	--	--	-	-	-
Unigene142087_All	319	14	0	1.8197	0	10.8295	up	3.86e-05	0.000464	--	--	--	--	--	--	--	--	--	--	--	--	--	--	--	--	--	--	-	-	-
Unigene86498_All	365	16	0	1.8176	0	10.8278	up	9.08e-06	0.000127	gi|115455657|ref|NP_001051429.1|	58.2	3e-08	Os03g0775300 [Oryza sativa Japonica Group] >gi|113549900|dbj|BAF13343.1| Os03g0775300 [Oryza sativa Japonica Group]	sp|Q8H8N3|TYW1_ORYSJ	58.2	2e-08	tRNA wybutosine-synthesizing protein 1 homolog OS=Oryza sativa subsp. japonica GN=TYW1 PE=2 SV=1	SPCC1020.08_2	51.6	3e-07	COG0731	Fe-S oxidoreductases	--	--	--	--	--	-	-	-
Unigene78870_All	344	15	0	1.808	0	10.8202	up	1.87e-05	0.000244	--	--	--	--	--	--	--	--	--	--	--	--	--	--	--	--	--	--	-	-	-
Unigene134585_All	367	16	0	1.8077	0	10.8199	up	9.08e-06	0.000128	--	--	--	--	--	--	--	--	--	--	--	--	--	--	--	--	--	--	-	-	-
Unigene84035_All	323	14	0	1.7972	0	10.8115	up	3.86e-05	0.000462	gi|115474425|ref|NP_001060809.1|	58.2	3e-08	Os08g0109200 [Oryza sativa Japonica Group] >gi|113622778|dbj|BAF22723.1| Os08g0109200 [Oryza sativa Japonica Group]	sp|P41682|ADH7_RAT	55.5	1e-07	Alcohol dehydrogenase class 4 mu/sigma chain OS=Rattus norvegicus GN=Adh7 PE=1 SV=2	PA5427	63.5	9e-11	COG1064	Zn-dependent alcohol dehydrogenases	K00121	5e-07	50.1	ath:AT1G22430	S-(hydroxymethyl)glutathione dehydrogenase / alcohol dehydrogenase [EC:1.1.1.284 1.1.1.1]	-	GO:0003824//catalytic activity	-
Unigene96319_All	347	15	0	1.7924	0	10.8077	up	1.87e-05	0.000243	--	--	--	--	--	--	--	--	--	--	--	--	--	--	--	--	--	--	-	-	-
Unigene11467_All	302	13	0	1.7849	0	10.8016	up	7.96e-05	0.00088	--	--	--	--	--	--	--	--	--	--	--	--	--	--	--	--	--	--	-	-	-
Unigene81371_All	303	13	0	1.779	0	10.7969	up	7.96e-05	0.000876	--	--	--	--	--	--	--	--	--	--	--	--	--	--	--	--	--	--	-	-	-
Unigene24309_All	770	33	0	1.777	0	10.7952	up	4.12e-11	1.31e-09	gi|115470959|ref|NP_001059078.1|	65.1	1e-09	Os07g0187900 [Oryza sativa Japonica Group] >gi|113610614|dbj|BAF20992.1| Os07g0187900 [Oryza sativa Japonica Group]	sp|P98088|MUC5A_HUMAN	80.5	1e-14	Mucin-5AC (Fragments) OS=Homo sapiens GN=MUC5AC PE=1 SV=3	--	--	--	--	--	K00558	5e-07	52.4	cre:CHLREDRAFT_15852	DNA (cytosine-5-)-methyltransferase [EC:2.1.1.37]	-	-	-
Unigene51971_All	304	13	0	1.7731	0	10.7921	up	7.96e-05	0.000877	--	--	--	--	--	--	--	--	--	--	--	--	--	--	--	--	--	--	-	-	-
Unigene65404_All	375	16	0	1.7691	0	10.7888	up	9.08e-06	0.000128	gi|66841323|dbj|BAD99219.1|	51.6	3e-10	polypeptide with a gag-like domain [Petunia x hybrida]	--	--	--	--	--	--	--	--	--	--	--	--	--	--	GO:0006259//DNA metabolic process	GO:0046914//transition metal ion binding;GO:0003676//nucleic acid binding;GO:0003824//catalytic activity	-
Unigene87033_All	352	15	0	1.7669	0	10.787	up	1.87e-05	0.000244	--	--	--	--	--	--	--	--	--	--	--	--	--	--	--	--	--	--	-	-	-
Unigene24104_All	588	25	0	1.7629	0	10.7837	up	1.35e-08	3.16e-07	--	--	--	--	--	--	--	--	--	--	--	--	--	--	--	--	--	--	-	-	-
Unigene23659_All	306	13	0	1.7615	0	10.7826	up	7.96e-05	0.000879	gi|3047086|gb|AAC13599.1|	84	6e-16	similar to reverse transcriptase (Pfam: transcript_fact.hmm, score: 72.31) [Arabidopsis thaliana]	--	--	--	--	--	--	--	--	--	--	--	--	--	--	-	-	-
Unigene90244_All	377	16	0	1.7597	0	10.7811	up	9.08e-06	0.000127	gi|116309412|emb|CAH66488.1|	67.8	8e-18	OSIGBa0076I14.9 [Oryza sativa Indica Group]	sp|P92519|M810_ARATH	62.8	6e-10	Uncharacterized mitochondrial protein AtMg00810 OS=Arabidopsis thaliana GN=AtMg00810 PE=4 SV=1	--	--	--	--	--	--	--	--	--	--	-	GO:0005488//binding	GO:0043231//intracellular membrane-bounded organelle
Unigene86972_All	330	14	0	1.7591	0	10.7806	up	3.86e-05	0.000461	gi|226508688|ref|NP_001148076.1|	60.5	6e-09	LOC100281684 [Zea mays] >gi|195615664|gb|ACG29662.1| receptor protein kinase PERK1 [Zea mays]	sp|Q02817|MUC2_HUMAN	67.4	3e-11	Mucin-2 OS=Homo sapiens GN=MUC2 PE=1 SV=2	--	--	--	--	--	K12822	4e-06	47	sbi:SORBI_07g020335	RNA-binding protein 25	-	-	-
Unigene81691_All	354	15	0	1.7569	0	10.7788	up	1.87e-05	0.000244	--	--	--	--	--	--	--	--	--	--	--	--	--	--	--	--	--	--	-	-	-
Unigene11579_All	307	13	0	1.7558	0	10.7779	up	7.96e-05	0.00088	gi|299473100|emb|CBN77493.1|	117	6e-26	Inositol-3-phosphate synthase [Ectocarpus siliculosus]	sp|Q54N49|INO1_DICDI	117	3e-26	Inositol-3-phosphate synthase OS=Dictyostelium discoideum GN=ino1 PE=3 SV=1	YJL153c	114	4e-26	COG1260	Myo-inositol-1-phosphate synthase	K01858	5e-28	119	ppp:PHYPADRAFT_223663	myo-inositol-1-phosphate synthase [EC:5.5.1.4]	GO:0044238//primary metabolic process;GO:0044237//cellular metabolic process	GO:0016853//isomerase activity	-
Unigene52895_All	307	13	0	1.7558	0	10.7779	up	7.96e-05	0.000877	--	--	--	--	--	--	--	--	--	--	--	--	--	--	--	--	--	--	-	-	-
Unigene12949_All	473	20	0	1.7532	0	10.7758	up	5.02e-07	9.1e-06	--	--	--	--	--	--	--	--	--	--	--	--	--	--	--	--	--	--	-	-	-
Unigene9294_All	735	31	0	1.7488	0	10.7721	up	1.75e-10	5.19e-09	gi|530876|gb|AAB53953.1|	91.3	1e-17	amino acid feature: rod protein domain, aa 266 .. 468; amino acid feature: globular protein domain, aa 32 .. 265 [Chlamydomonas reinhardtii]	sp|P08640|MUC1_YEAST	91.3	6e-18	Flocculation protein FLO11 OS=Saccharomyces cerevisiae (strain ATCC 204508 / S288c) GN=MUC1 PE=1 SV=2	SPBC28F2.12	70.9	2e-12	COG0086	DNA-directed RNA polymerase, beta' subunit/160 kD subunit	K03006	4e-14	75.9	cre:CHLREDRAFT_196948	DNA-directed RNA polymerase II subunit A [EC:2.7.7.6]	-	-	-
Unigene62439_All	356	15	0	1.7471	0	10.7707	up	1.87e-05	0.000244	--	--	--	--	--	--	--	--	--	--	--	--	--	--	--	--	--	--	-	-	-
Unigene85776_All	310	13	0	1.7388	0	10.7639	up	7.96e-05	0.000874	--	--	--	--	--	--	--	--	--	--	--	--	--	--	--	--	--	--	-	-	-
Unigene84168_All	311	13	0	1.7332	0	10.7592	up	7.96e-05	0.000874	--	--	--	--	--	--	--	--	--	--	--	--	--	--	--	--	--	--	-	-	-
Unigene95481_All	311	13	0	1.7332	0	10.7592	up	7.96e-05	0.000872	--	--	--	--	sp|P25613|ADY2_YEAST	55.1	1e-07	Accumulation of dyads protein 2 OS=Saccharomyces cerevisiae (strain ATCC 204508 / S288c) GN=ADY2 PE=1 SV=1	YCR010c	55.1	3e-08	COG1584	Predicted membrane protein	--	--	--	--	--	-	-	-
Unigene21691_All	359	15	0	1.7325	0	10.7586	up	1.87e-05	0.000244	--	--	--	--	--	--	--	--	--	--	--	--	--	--	--	--	--	--	-	-	-
Unigene73955_All	455	19	0	1.7315	0	10.7578	up	1.04e-06	1.77e-05	--	--	--	--	--	--	--	--	--	--	--	--	--	--	--	--	--	--	-	-	-
Unigene82249_All	432	18	0	1.7277	0	10.7546	up	2.14e-06	3.42e-05	gi|6587811|gb|AAF18502.1|AC010924_15	117	3e-26	ESTs gb|AI992787, gb|T20398 come from this gene [Arabidopsis thaliana]	sp|O09101|PIGF_MOUSE	58.5	1e-08	Phosphatidylinositol-glycan biosynthesis class F protein OS=Mus musculus GN=Pigf PE=1 SV=1	--	--	--	--	--	--	--	--	--	--	-	-	-
Unigene83241_All	410	17	0	1.7192	0	10.7475	up	4.4e-06	6.6e-05	gi|15617223|gb|AAL00886.1|	145	2e-34	catalase [Suaeda salsa]	sp|Q9C168|CAT1_NEUCR	239	4e-63	Catalase-1 OS=Neurospora crassa GN=cat-1 PE=1 SV=2	DRA0259	171	4e-43	COG0753	Catalase	K03781	1e-34	142	osa:4328073	catalase [EC:1.11.1.6]	-	GO:0046872//metal ion binding;GO:0016491//oxidoreductase activity	-
Unigene78094_All	390	16	0	1.7011	0	10.7323	up	9.08e-06	0.000128	--	--	--	--	--	--	--	--	--	--	--	--	--	--	--	--	--	--	-	-	-
Unigene87244_All	317	13	0	1.7004	0	10.7317	up	7.96e-05	0.000873	--	--	--	--	sp|P53693|RDS1_SCHPO	82.4	8e-16	Protein rds1 OS=Schizosaccharomyces pombe (strain ATCC 38366 / 972) GN=rds1 PE=2 SV=2	--	--	--	--	--	--	--	--	--	--	-	-	-
Unigene31617_All	319	13	0	1.6897	0	10.7226	up	7.96e-05	0.000878	--	--	--	--	--	--	--	--	--	--	--	--	--	--	--	--	--	--	-	-	-
Unigene83966_All	345	14	0	1.6826	0	10.7165	up	3.86e-05	0.000462	--	--	--	--	--	--	--	--	--	--	--	--	--	--	--	--	--	--	-	-	-
Unigene50663_All	371	15	0	1.6764	0	10.7112	up	1.87e-05	0.000244	--	--	--	--	--	--	--	--	--	--	--	--	--	--	--	--	--	--	-	-	-
Unigene26050_All	351	14	0	1.6538	0	10.6916	up	3.86e-05	0.000463	gi|224080099|ref|XP_002306017.1|	110	7e-24	SET domain-containing protein [Populus trichocarpa] >gi|222848981|gb|EEE86528.1| SET domain-containing protein [Populus trichocarpa]	--	--	--	--	--	--	--	--	--	K05302	5e-07	50.1	olu:OSTLU_25650	SET domain-containing protein 6	-	-	-
Unigene87048_All	351	14	0	1.6538	0	10.6916	up	3.86e-05	0.000461	--	--	--	--	sp|P78574|CATA_ASPFU	134	2e-31	Catalase A OS=Neosartorya fumigata (strain ATCC MYA-4609 / Af293 / CBS 101355 / FGSC A1100) GN=catA PE=3 SV=2	PA2147	57.4	6e-09	COG0753	Catalase	--	--	--	--	--	-	-	-
Unigene54438_All	326	13	0	1.6535	0	10.6913	up	7.96e-05	0.000877	--	--	--	--	--	--	--	--	--	--	--	--	--	--	--	--	--	--	-	-	-
Unigene39051_All	477	19	0	1.6516	0	10.6896	up	1.04e-06	1.77e-05	--	--	--	--	--	--	--	--	--	--	--	--	--	--	--	--	--	--	-	-	-
Unigene35229_All	482	19	0	1.6345	0	10.6746	up	1.04e-06	1.77e-05	gi|38637381|dbj|BAD03641.1|	52.8	2e-06	cell wall protein-like [Oryza sativa Japonica Group] >gi|45735922|dbj|BAD12953.1| cell wall protein-like [Oryza sativa Japonica Group]	--	--	--	--	--	--	--	--	--	--	--	--	--	--	-	-	-
Unigene87873_All	435	17	0	1.6204	0	10.6621	up	4.4e-06	6.59e-05	--	--	--	--	--	--	--	--	--	--	--	--	--	--	--	--	--	--	-	-	-
Unigene35683_All	333	13	0	1.6187	0	10.6606	up	7.96e-05	0.000878	gi|18403810|ref|NP_566730.1|	80.5	6e-15	mate efflux domain-containing protein [Arabidopsis thaliana] >gi|75274226|sp|Q9LUH2.1|ALF5_ARATH RecName: Full=MATE efflux family protein ALF5; AltName: Full=Protein ABERRANT LATERAL ROOT FORMATION 5; AltName: Full=Protein DTX19 >gi|13384114|gb|AAK21273.1|AF337954_1 aberrant lateral root formation 5 [Arabidopsis thaliana] >gi|332643256|gb|AEE76777.1| mate efflux domain-containing protein [Arabido…	sp|Q9LUH2|ALF5_ARATH	80.5	3e-15	MATE efflux family protein ALF5 OS=Arabidopsis thaliana GN=ALF5 PE=2 SV=1	--	--	--	--	--	--	--	--	--	--	GO:0042221//response to chemical stimulus;GO:0006810//transport	GO:0015291//secondary active transmembrane transporter activity	GO:0044464//cell part
Unigene25273_All	704	27	0	1.5902	0	10.635	up	3.17e-09	8.06e-08	gi|301095349|ref|XP_002896775.1|	244	1e-63	60S acidic ribosomal protein P0 [Phytophthora infestans T30-4] >gi|262108658|gb|EEY66710.1| 60S acidic ribosomal protein P0 [Phytophthora infestans T30-4]	sp|Q96TJ5|RLA0_NEUCR	372	1e-102	60S acidic ribosomal protein P0 OS=Neurospora crassa GN=crpp0 PE=2 SV=1	YLR340w	336	2e-92	COG0244	Ribosomal protein L10	K02941	6e-65	244	ppp:PHYPADRAFT_179848	large subunit ribosomal protein LP0	GO:0006412//translation	GO:0005198//structural molecule activity	GO:0030529//ribonucleoprotein complex
Unigene81383_All	339	13	0	1.5901	0	10.6349	up	7.96e-05	0.000876	--	--	--	--	sp|P0C957|PLB1_ASPFU	127	3e-29	Lysophospholipase 1 OS=Neosartorya fumigata (strain ATCC MYA-4609 / Af293 / CBS 101355 / FGSC A1100) GN=plb1 PE=2 SV=1	--	--	--	--	--	--	--	--	--	--	-	-	-
Unigene84898_All	392	15	0	1.5866	0	10.6317	up	1.87e-05	0.000244	--	--	--	--	--	--	--	--	--	--	--	--	--	--	--	--	--	--	-	-	-
Unigene52088_All	340	13	0	1.5854	0	10.6306	up	7.96e-05	0.000877	gi|159484328|ref|XP_001700210.1|	149	1e-35	acetyl CoA synthetase [Chlamydomonas reinhardtii] >gi|158272526|gb|EDO98325.1| acetyl CoA synthetase [Chlamydomonas reinhardtii]	sp|P16929|ACSA_NEUCR	195	8e-50	Acetyl-coenzyme A synthetase OS=Neurospora crassa GN=acu-5 PE=2 SV=2	SPCC417.14c	160	7e-40	COG0365	Acyl-coenzyme A synthetases/AMP-(fatty) acid ligases	K01895	8e-37	149	cre:CHLREDRAFT_194063	acetyl-CoA synthetase [EC:6.2.1.1]	-	GO:0016874//ligase activity	GO:0043231//intracellular membrane-bounded organelle
Unigene81342_All	340	13	0	1.5854	0	10.6306	up	7.96e-05	0.000876	--	--	--	--	--	--	--	--	--	--	--	--	--	--	--	--	--	--	-	-	-
Unigene84259_All	368	14	0	1.5774	0	10.6233	up	3.86e-05	0.000461	--	--	--	--	--	--	--	--	--	--	--	--	--	--	--	--	--	--	-	-	-
Unigene87909_All	344	13	0	1.5669	0	10.6137	up	7.96e-05	0.000872	--	--	--	--	--	--	--	--	--	--	--	--	--	--	--	--	--	--	-	-	-
Unigene12735_All	478	18	0	1.5614	0	10.6086	up	2.14e-06	3.42e-05	gi|255078452|ref|XP_002502806.1|	89.4	2e-17	short chain dehydrogenase/reductase family protein [Micromonas sp. RCC299] >gi|226518072|gb|ACO64064.1| short chain dehydrogenase/reductase family protein [Micromonas sp. RCC299]	sp|Q9RPT1|RHLG_PSEAE	73.9	4e-13	Rhamnolipids biosynthesis 3-oxoacyl-[acyl-carrier-protein] reductase OS=Pseudomonas aeruginosa GN=rhlG PE=1 SV=1	APE2503	75.1	5e-14	COG1028	Dehydrogenases with different specificities (related to short-chain alcohol dehydrogenases)	K00059	2e-10	62.8	osa:4335609	3-oxoacyl-[acyl-carrier protein] reductase [EC:1.1.1.100]	-	GO:0003824//catalytic activity	-
Unigene62739_All	719	27	0	1.5571	0	10.6046	up	3.17e-09	8.05e-08	gi|308801687|ref|XP_003078157.1|	75.9	5e-13	Gpr1 family protein (ISS) [Ostreococcus tauri] >gi|116056608|emb|CAL52897.1| Gpr1 family protein (ISS) [Ostreococcus tauri]	sp|O14201|MUG86_SCHPO	178	4e-44	Meiotically up-regulated gene 86 protein OS=Schizosaccharomyces pombe (strain ATCC 38366 / 972) GN=mug86 PE=1 SV=1	SPAC5D6.09c	178	9e-45	COG1584	Predicted membrane protein	K07034	4e-33	139	ppp:PHYPADRAFT_123327		-	-	-
Unigene82806_All	373	14	0	1.5563	0	10.6039	up	3.86e-05	0.000462	--	--	--	--	--	--	--	--	--	--	--	--	--	--	--	--	--	--	-	-	-
Unigene84491_All	347	13	0	1.5534	0	10.6012	up	7.96e-05	0.000874	--	--	--	--	--	--	--	--	--	--	--	--	--	--	--	--	--	--	-	-	-
Unigene87547_All	562	21	0	1.5494	0	10.5975	up	2.44e-07	4.67e-06	gi|307136175|gb|ADN34016.1|	149	3e-35	ty3-gypsy retrotransposon protein [Cucumis melo subsp. melo]	--	--	--	--	--	--	--	--	--	--	--	--	--	--	-	-	-
Unigene48783_All	348	13	0	1.5489	0	10.597	up	7.96e-05	0.000878	--	--	--	--	--	--	--	--	--	--	--	--	--	--	--	--	--	--	-	-	-
Unigene49731_All	536	20	0	1.5472	0	10.5954	up	5.02e-07	9.09e-06	--	--	--	--	--	--	--	--	--	--	--	--	--	--	--	--	--	--	-	-	-
Unigene55539_All	349	13	0	1.5445	0	10.5929	up	7.96e-05	0.000877	--	--	--	--	--	--	--	--	--	--	--	--	--	--	--	--	--	--	-	-	-
Unigene49583_All	435	16	0	1.5251	0	10.5747	up	9.08e-06	0.000128	--	--	--	--	--	--	--	--	--	--	--	--	--	--	--	--	--	--	-	-	-
Unigene83797_All	440	16	0	1.5078	0	10.5582	up	9.08e-06	0.000127	--	--	--	--	--	--	--	--	--	--	--	--	--	--	--	--	--	--	-	-	-
Unigene37443_All	359	13	0	1.5015	0	10.5522	up	7.96e-05	0.000878	--	--	--	--	--	--	--	--	--	--	--	--	--	--	--	--	--	--	-	-	-
Unigene83632_All	415	15	0	1.4987	0	10.5495	up	1.87e-05	0.000244	gi|438003|emb|CAA81076.1|	152	1e-36	P protein [Flaveria pringlei]	sp|Q5NZ93|GCSP_AROAE	155	6e-38	Glycine dehydrogenase [decarboxylating] OS=Aromatoleum aromaticum (strain EbN1) GN=gcvP PE=3 SV=1	SPAC13G6.06c_2	169	1e-42	COG1003	Glycine cleavage system protein P (pyridoxal-binding), C-terminal domain	K00281	4e-37	150	vvi:100266170	glycine dehydrogenase [EC:1.4.4.2]	GO:0010038//response to metal ion;GO:0006546//glycine catabolic process	GO:0016642;GO:0048037//cofactor binding;GO:0032559//adenyl ribonucleotide binding	GO:0043234//protein complex;GO:0009526//plastid envelope;GO:0005576//extracellular region
Unigene28254_All	389	14	0	1.4923	0	10.5433	up	3.86e-05	0.000463	gi|224122626|ref|XP_002318883.1|	56.6	9e-08	predicted protein [Populus trichocarpa] >gi|222859556|gb|EEE97103.1| predicted protein [Populus trichocarpa]	--	--	--	--	--	--	--	--	--	--	--	--	--	--	-	-	-
Unigene84051_All	392	14	0	1.4808	0	10.5322	up	3.86e-05	0.000461	--	--	--	--	--	--	--	--	--	--	--	--	--	--	--	--	--	--	-	-	-
Unigene79498_All	421	15	0	1.4773	0	10.5287	up	1.87e-05	0.000244	--	--	--	--	--	--	--	--	--	--	--	--	--	--	--	--	--	--	-	-	-
Unigene12566_All	365	13	0	1.4768	0	10.5283	up	7.96e-05	0.00088	gi|254033594|gb|ACT55265.1|	55.1	3e-07	formin 2B [Physcomitrella patens]	sp|Q2J728|IF2_FRASC	55.8	8e-08	Translation initiation factor IF-2 OS=Frankia sp. (strain CcI3) GN=infB PE=3 SV=1	--	--	--	--	--	K11086	5e-06	46.6	rcu:RCOM_0771300	small nuclear ribonucleoprotein B and B'	-	-	-
Unigene22745_All	1014	36	0	1.4721	0	10.5237	up	4.7e-12	1.63e-10	gi|2388584|gb|AAB71465.1|	74.7	2e-12	EST gb|ATTS1136 comes from this gene [Arabidopsis thaliana]	sp|P98088|MUC5A_HUMAN	85.1	7e-16	Mucin-5AC (Fragments) OS=Homo sapiens GN=MUC5AC PE=1 SV=3	--	--	--	--	--	--	--	--	--	--	-	-	-
Unigene84028_All	396	14	0	1.4659	0	10.5176	up	3.86e-05	0.000462	--	--	--	--	sp|P48503|QCR8_NEUCR	118	1e-26	Cytochrome b-c1 complex subunit 8 OS=Neurospora crassa GN=qcr-8 PE=1 SV=1	--	--	--	--	--	--	--	--	--	--	-	-	-
Unigene23163_All	398	14	0	1.4585	0	10.5103	up	3.86e-05	0.000463	gi|227438239|gb|ACP30609.1|	66.2	1e-15	disease resistance protein [Brassica rapa subsp. pekinensis]	--	--	--	--	--	--	--	--	--	--	--	--	--	--	GO:0009987//cellular process;GO:0044238//primary metabolic process;GO:0043170	GO:0003676//nucleic acid binding	GO:0044464//cell part
Unigene40610_All	484	17	0	1.4564	0	10.5082	up	4.4e-06	6.61e-05	--	--	--	--	--	--	--	--	--	--	--	--	--	--	--	--	--	--	-	-	-
Unigene6575_All	1025	36	0	1.4563	0	10.5081	up	4.7e-12	1.63e-10	gi|225451615|ref|XP_002275754.1|	429	1e-119	PREDICTED: similar to SUVH4 (SU(VAR)3-9 HOMOLOG 4) [Vitis vinifera]	sp|Q8GZB6|SUVH4_ARATH	376	2e-103	Histone-lysine N-methyltransferase, H3 lysine-9 specific SUVH4 OS=Arabidopsis thaliana GN=SUVH4 PE=1 SV=2	SPBC428.08c	127	4e-29	COG2940	Proteins containing SET domain	K11423	1e-11	68.6	cre:CHLREDRAFT_191388	histone-lysine N-methyltransferase SETD2 [EC:2.1.1.43]	GO:0006325//chromatin organization	GO:0046914//transition metal ion binding;GO:0016279//protein-lysine N-methyltransferase activity	GO:0043231//intracellular membrane-bounded organelle
Unigene141493_All	429	15	0	1.4498	0	10.5016	up	1.87e-05	0.000245	gi|127058161|dbj|BAF48663.1|	179	7e-45	leucine-rich repeat/extensin [Nicotiana plumbaginifolia] >gi|127058167|dbj|BAF48664.1| leucine-rich repeat/extensin [Nicotiana plumbaginifolia]	sp|Q4PSE6|LRX7_ARATH	177	3e-44	Leucine-rich repeat extensin-like protein 7 OS=Arabidopsis thaliana GN=LRX7 PE=2 SV=1	--	--	--	--	--	K13415	2e-15	78.6	sbi:SORBI_03g032990	protein brassinosteroid insensitive 1 [EC:2.7.10.1 2.7.11.1]	-	GO:0016491//oxidoreductase activity;GO:0005198//structural molecule activity	-
Unigene84140_All	458	16	0	1.4485	0	10.5003	up	9.08e-06	0.000127	gi|114797032|gb|ABI79453.1|	52.4	2e-06	alkaline serine protease [labyrinthulid quahog parasite QPX]	sp|P58371|SPM1_MAGO7	229	7e-60	Subtilisin-like proteinase Spm1 OS=Magnaporthe oryzae (strain 70-15 / FGSC 8958) GN=SPM1 PE=3 SV=1	YEL060c	163	9e-41	COG1404	Subtilisin-like serine proteases	--	--	--	--	--	-	-	-
Unigene39849_All	487	17	0	1.4474	0	10.4992	up	4.4e-06	6.61e-05	gi|317373528|sp|Q9LK03.3|PERK2_ARATH	52.8	2e-06	RecName: Full=Proline-rich receptor-like protein kinase PERK2; AltName: Full=Proline-rich extensin-like receptor kinase 2; Short=AtPERK2; AltName: Full=Somatic embryogenesis receptor kinase-like protein	sp|Q9LK03|PERK2_ARATH	52.8	1e-06	Proline-rich receptor-like protein kinase PERK2 OS=Arabidopsis thaliana GN=PERK2 PE=2 SV=3	--	--	--	--	--	K03006	3e-06	48.5	rcu:RCOM_0782880	DNA-directed RNA polymerase II subunit A [EC:2.7.7.6]	-	-	-
Unigene78155_All	374	13	0	1.4413	0	10.4932	up	7.96e-05	0.000876	--	--	--	--	--	--	--	--	--	--	--	--	--	--	--	--	--	--	-	-	-
Unigene49040_All	605	21	0	1.4392	0	10.4911	up	2.44e-07	4.68e-06	gi|168008990|ref|XP_001757189.1|	153	1e-36	Rab11/RabA-family small GTPase [Physcomitrella patens subsp. patens] >gi|162691687|gb|EDQ78048.1| Rab11/RabA-family small GTPase [Physcomitrella patens subsp. patens]	sp|O35509|RB11B_RAT	157	6e-38	Ras-related protein Rab-11B OS=Rattus norvegicus GN=Rab11b PE=2 SV=4	SPAC18G6.03	148	6e-36	COG1100	GTPase SAR1 and related small G proteins	K07905	9e-39	157	zma:100274335	Ras-related protein Rab-11B	GO:0035556;GO:0006810//transport	GO:0032561//guanyl ribonucleotide binding	GO:0016020//membrane
Unigene78307_All	376	13	0	1.4336	0	10.4854	up	7.96e-05	0.000876	--	--	--	--	--	--	--	--	--	--	--	--	--	--	--	--	--	--	-	-	-
Unigene86434_All	378	13	0	1.426	0	10.4778	up	7.96e-05	0.000873	gi|15228273|ref|NP_187648.1|	139	8e-33	glycerol-3-phosphate dehydrogenase SDP6 [Arabidopsis thaliana] >gi|75266244|sp|Q9SS48.1|SDP6_ARATH RecName: Full=Glycerol-3-phosphate dehydrogenase SDP6, mitochondrial; AltName: Full=Protein SUGAR-DEPENDENT 6; Flags: Precursor >gi|332641376|gb|AEE74897.1| glycerol-3-phosphate dehydrogenase SDP6 [Arabidopsis thaliana]	sp|Q64521|GPDM_MOUSE	175	7e-44	Glycerol-3-phosphate dehydrogenase, mitochondrial OS=Mus musculus GN=Gpd2 PE=1 SV=2	ECU10g0870	135	2e-32	COG0578	Glycerol-3-phosphate dehydrogenase	K00111	5e-34	139	ath:AT3G10370	glycerol-3-phosphate dehydrogenase [EC:1.1.5.3]	GO:0006071//glycerol metabolic process;GO:0022904//respiratory electron transport chain	GO:0016901	GO:0043231//intracellular membrane-bounded organelle
Unigene84053_All	379	13	0	1.4222	0	10.4739	up	7.96e-05	0.000874	--	--	--	--	--	--	--	--	--	--	--	--	--	--	--	--	--	--	-	-	-
Unigene85091_All	382	13	0	1.4111	0	10.4626	up	7.96e-05	0.000874	--	--	--	--	--	--	--	--	--	--	--	--	--	--	--	--	--	--	-	-	-
Unigene77594_All	412	14	0	1.409	0	10.4605	up	3.86e-05	0.000462	--	--	--	--	--	--	--	--	--	--	--	--	--	--	--	--	--	--	-	-	-
Unigene65611_All	385	13	0	1.4001	0	10.4513	up	7.96e-05	0.000877	--	--	--	--	--	--	--	--	--	--	--	--	--	--	--	--	--	--	-	-	-
Unigene85866_All	416	14	0	1.3954	0	10.4465	up	3.86e-05	0.000461	--	--	--	--	--	--	--	--	--	--	--	--	--	--	--	--	--	--	-	-	-
Unigene77377_All	389	13	0	1.3857	0	10.4364	up	7.96e-05	0.000876	--	--	--	--	--	--	--	--	--	--	--	--	--	--	--	--	--	--	-	-	-
Unigene138828_All	398	13	0	1.3543	0	10.4033	up	7.96e-05	0.000879	gi|30681265|ref|NP_179708.2|	59.3	1e-08	uncharacterized protein [Arabidopsis thaliana] >gi|109946593|gb|ABG48475.1| At2g21120 [Arabidopsis thaliana] >gi|330252031|gb|AEC07125.1| uncharacterized protein [Arabidopsis thaliana]	--	--	--	--	--	--	--	--	--	--	--	--	--	--	-	-	GO:0044464//cell part
Unigene86406_All	401	13	0	1.3442	0	10.3925	up	7.96e-05	0.000873	gi|219129966|ref|XP_002185147.1|	177	5e-44	isomerase glucose-6-phosphate isomerase [Phaeodactylum tricornutum CCAP 1055/1] >gi|217403326|gb|EEC43279.1| isomerase glucose-6-phosphate isomerase [Phaeodactylum tricornutum CCAP 1055/1]	sp|Q7S986|G6PI_NEUCR	238	1e-62	Glucose-6-phosphate isomerase OS=Neurospora crassa GN=pgi-1 PE=3 SV=1	YBR196c	211	4e-55	COG0166	Glucose-6-phosphate isomerase	K01810	4e-30	127	ppp:PHYPADRAFT_198839	glucose-6-phosphate isomerase [EC:5.3.1.9]	GO:0006007//glucose catabolic process	GO:0016861//intramolecular oxidoreductase activity, interconverting aldoses and ketoses	GO:0044444//cytoplasmic part
Unigene42443_All	617	20	0	1.344	0	10.3923	up	5.02e-07	9.09e-06	--	--	--	--	--	--	--	--	--	--	--	--	--	--	--	--	--	--	-	-	-
Unigene81171_All	402	13	0	1.3409	0	10.389	up	7.96e-05	0.000876	gi|334184656|ref|NP_001189666.1|	161	2e-39	actin-related protein C2B [Arabidopsis thaliana] >gi|330253734|gb|AEC08828.1| actin-related protein C2B [Arabidopsis thaliana]	sp|Q8WTM6|ARPC2_CAEEL	58.2	2e-08	Probable actin-related protein 2/3 complex subunit 2 OS=Caenorhabditis elegans GN=arx-4 PE=2 SV=1	--	--	--	--	--	K05758	5e-47	183	pop:POPTR_803770	actin related protein 2/3 complex, subunit 2	GO:0008064//regulation of actin polymerization or depolymerization	-	GO:0015629//actin cytoskeleton
Unigene51896_All	464	15	0	1.3404	0	10.3884	up	1.87e-05	0.000244	--	--	--	--	--	--	--	--	--	--	--	--	--	--	--	--	--	--	-	-	-
Unigene38078_All	405	13	0	1.3309	0	10.3782	up	7.96e-05	0.000878	gi|7523689|gb|AAF63128.1|AC009526_13	57.4	5e-08	Similar to Athila ORF 1 [Arabidopsis thaliana]	sp|Q92794|MYST3_HUMAN	52	1e-06	Histone acetyltransferase MYST3 OS=Homo sapiens GN=MYST3 PE=1 SV=2	--	--	--	--	--	K12200	4e-06	47.4	rcu:RCOM_0274750	programmed cell death 6-interacting protein	-	GO:0005488//binding;GO:0003824//catalytic activity	-
Unigene84145_All	468	15	0	1.329	0	10.3761	up	1.87e-05	0.000244	--	--	--	--	--	--	--	--	--	--	--	--	--	--	--	--	--	--	-	-	-
Unigene84031_All	533	17	0	1.3225	0	10.3691	up	4.4e-06	6.6e-05	--	--	--	--	--	--	--	--	--	--	--	--	--	--	--	--	--	--	-	-	-
Unigene81335_All	448	14	0	1.2957	0	10.3395	up	3.86e-05	0.000462	--	--	--	--	--	--	--	--	--	--	--	--	--	--	--	--	--	--	-	-	-
Unigene90435_All	487	15	0	1.2771	0	10.3187	up	1.87e-05	0.000243	gi|334188432|ref|NP_001190549.1|	85.9	2e-16	inactive beta-amylase 4 [Arabidopsis thaliana] >gi|332009287|gb|AED96670.1| inactive beta-amylase 4 [Arabidopsis thaliana]	sp|Q9FM68|BAM4_ARATH	85.9	1e-16	Inactive beta-amylase 4, chloroplastic OS=Arabidopsis thaliana GN=BAM4 PE=2 SV=1	--	--	--	--	--	K01177	2e-07	52.4	ath:AT4G17090	beta-amylase [EC:3.2.1.2]	GO:0005982//starch metabolic process	GO:0016160//amylase activity	GO:0009536//plastid
Unigene62856_All	553	17	0	1.2747	0	10.3159	up	4.4e-06	6.61e-05	gi|114682|sp|P22778.1|ATPO_IPOBA	84	1e-15	RecName: Full=ATP synthase subunit O, mitochondrial; AltName: Full=Oligomycin sensitivity conferral protein; Short=OSCP; Flags: Precursor >gi|168270|gb|AAA33388.1| F-1-ATPase delta subunit precursor (EC 3.6.1.3) [Ipomoea batatas]	sp|Q9P602|ATPO_NEUCR	187	3e-47	ATP synthase subunit 5, mitochondrial OS=Neurospora crassa GN=atp-5 PE=3 SV=2	YDR298c	119	4e-27	COG0712	F0F1-type ATP synthase, delta subunit (mitochondrial oligomycin sensitivity protein)	K02137	1e-42	169	zma:100191583	F-type H+-transporting ATPase oligomycin sensitivity conferral protein [EC:3.6.3.14]	GO:0006754//ATP biosynthetic process	-	GO:0016020//membrane
Unigene85790_All	423	13	0	1.2743	0	10.3155	up	7.96e-05	0.000874	--	--	--	--	--	--	--	--	--	--	--	--	--	--	--	--	--	--	-	-	-
Unigene94175_All	522	16	0	1.2709	0	10.3116	up	9.08e-06	0.000127	gi|77553435|gb|ABA96231.1|	52.8	2e-06	transposon protein, putative, CACTA, En/Spm sub-class [Oryza sativa Japonica Group]	--	--	--	--	--	--	--	--	--	--	--	--	--	--	-	-	-
Unigene23760_All	426	13	0	1.2653	0	10.3053	up	7.96e-05	0.000879	--	--	--	--	--	--	--	--	--	--	--	--	--	--	--	--	--	--	-	-	-
Unigene63960_All	428	13	0	1.2594	0	10.2985	up	7.96e-05	0.000877	gi|20042923|gb|AAM08751.1|AC025098_18	84.7	3e-16	Putative copia-type polyprotein [Oryza sativa Japonica Group]	sp|P92519|M810_ARATH	62	1e-09	Uncharacterized mitochondrial protein AtMg00810 OS=Arabidopsis thaliana GN=AtMg00810 PE=4 SV=1	--	--	--	--	--	--	--	--	--	--	GO:0006259//DNA metabolic process;GO:0006091//generation of precursor metabolites and energy	GO:0016209//antioxidant activity;GO:0003676//nucleic acid binding	GO:0043231//intracellular membrane-bounded organelle
Unigene7014_All	560	17	0	1.2587	0	10.2977	up	4.4e-06	6.6e-05	gi|15233943|ref|NP_192693.1|	100	1e-20	mitotic-spindle organizing protein 1B [Arabidopsis thaliana] >gi|75181630|sp|Q9M0N8.1|MZT1B_ARATH RecName: Full=Mitotic-spindle organizing protein 1B; AltName: Full=GCP3-interacting protein 1; Short=AtGIP1; AltName: Full=Mitotic-spindle organizing protein associated with a ring of gamma-tubulin 1B >gi|37202050|gb|AAQ89640.1| At4g09550 [Arabidopsis thaliana] >gi|332657364|gb|AEE82764.1| mitotic-sp…	sp|Q9M0N8|MZT1B_ARATH	100	6e-21	Mitotic-spindle organizing protein 1B OS=Arabidopsis thaliana GN=At4g09550 PE=1 SV=1	--	--	--	--	--	--	--	--	--	--	-	GO:0005488//binding	GO:0015630//microtubule cytoskeleton
Unigene22017_All	462	14	0	1.2565	0	10.2952	up	3.86e-05	0.000463	gi|38426731|gb|AAR20443.1|	73.9	7e-13	delta-12 desaturase [Saprolegnia diclina]	sp|P59668|FAD12_MORIS	68.2	2e-11	Delta(12) fatty acid desaturase OS=Mortierella isabellina PE=2 SV=1	Rv0312	53.9	1e-07	COG0443	Molecular chaperone	K10256	9e-13	70.1	zma:100381639	omega-6 fatty acid desaturase (delta-12 desaturase) [EC:1.14.19.-]	-	-	-
Unigene80314_All	435	13	0	1.2391	0	10.2751	up	7.96e-05	0.000876	--	--	--	--	--	--	--	--	--	--	--	--	--	--	--	--	--	--	-	-	-
Unigene22358_All	439	13	0	1.2279	0	10.262	up	7.96e-05	0.000879	--	--	--	--	--	--	--	--	--	--	--	--	--	--	--	--	--	--	-	-	-
Unigene49312_All	476	14	0	1.2195	0	10.2521	up	3.86e-05	0.000463	--	--	--	--	--	--	--	--	--	--	--	--	--	--	--	--	--	--	-	-	-
Unigene76405_All	478	14	0	1.2144	0	10.246	up	3.86e-05	0.000462	gi|15238279|ref|NP_196643.1|	124	6e-28	major facilitator protein [Arabidopsis thaliana] >gi|332004217|gb|AED91600.1| major facilitator protein [Arabidopsis thaliana]	sp|Q9Y6V0|PCLO_HUMAN	50.4	5e-06	Protein piccolo OS=Homo sapiens GN=PCLO PE=1 SV=4	--	--	--	--	--	--	--	--	--	--	GO:0051234//establishment of localization	-	GO:0044464//cell part
Unigene85488_All	480	14	0	1.2094	0	10.2401	up	3.86e-05	0.000461	gi|298708482|emb|CBJ30606.1|	126	1e-28	eukaryotic initiation factor 4A [Ectocarpus siliculosus]	sp|A7EGL7|IF4A_SCLS1	169	7e-42	ATP-dependent RNA helicase eIF4A OS=Sclerotinia sclerotiorum (strain ATCC 18683 / 1980 / Ss-1) GN=tif1 PE=3 SV=1	SPAC1006.07	142	3e-34	COG0513	Superfamily II DNA and RNA helicases	K03257	7e-29	123	ath:AT1G72730	translation initiation factor eIF-4A	GO:0010038//response to metal ion	GO:0008135//translation factor activity, nucleic acid binding;GO:0042623//ATPase activity, coupled;GO:0032559//adenyl ribonucleotide binding	GO:0005618//cell wall;GO:0044444//cytoplasmic part;GO:0016020//membrane
Unigene69485_All	589	17	0	1.1967	0	10.2248	up	4.4e-06	6.61e-05	gi|15242952|ref|NP_200041.1|	78.2	7e-14	Myosin heavy chain-related protein [Arabidopsis thaliana] >gi|10177394|dbj|BAB10525.1| hyaluronan mediated motility receptor-like protein [Arabidopsis thaliana] >gi|47550677|gb|AAT35237.1| At5g52280 [Arabidopsis thaliana] >gi|51970830|dbj|BAD44107.1| hyaluronan mediated motility receptor-like protein [Arabidopsis thaliana] >gi|332008812|gb|AED96195.1| Myosin heavy chain-related protein [Arabidops…	--	--	--	--	--	--	--	--	--	--	--	--	--	--	-	-	GO:0009536//plastid
Unigene88807_All	451	13	0	1.1952	0	10.223	up	7.96e-05	0.000872	--	--	--	--	--	--	--	--	--	--	--	--	--	--	--	--	--	--	-	-	-
Unigene22801_All	522	15	0	1.1915	0	10.2186	up	1.87e-05	0.000244	--	--	--	--	--	--	--	--	--	--	--	--	--	--	--	--	--	--	-	-	-
Unigene130503_All	523	15	0	1.1892	0	10.2158	up	1.87e-05	0.000245	--	--	--	--	--	--	--	--	--	--	--	--	--	--	--	--	--	--	-	-	-
Unigene63879_All	490	14	0	1.1847	0	10.2103	up	3.86e-05	0.000462	--	--	--	--	--	--	--	--	--	--	--	--	--	--	--	--	--	--	-	-	-
Unigene22629_All	463	13	0	1.1642	0	10.1851	up	7.96e-05	0.000879	--	--	--	--	--	--	--	--	--	--	--	--	--	--	--	--	--	--	-	-	-
Unigene139093_All	610	17	0	1.1555	0	10.1743	up	4.4e-06	6.62e-05	--	--	--	--	--	--	--	--	--	--	--	--	--	--	--	--	--	--	-	-	-
Unigene38611_All	503	14	0	1.1541	0	10.1726	up	3.86e-05	0.000463	--	--	--	--	sp|P81449|ATPJ_YEAST	67	6e-11	ATP synthase subunit e, mitochondrial OS=Saccharomyces cerevisiae (strain ATCC 204508 / S288c) GN=TIM11 PE=1 SV=2	--	--	--	--	--	--	--	--	--	--	-	-	-
Unigene13027_All	470	13	0	1.1469	0	10.1635	up	7.96e-05	0.00088	--	--	--	--	--	--	--	--	--	--	--	--	--	--	--	--	--	--	-	-	-
Unigene12351_All	476	13	0	1.1324	0	10.1452	up	7.96e-05	0.00088	gi|122890312|emb|CAJ73364.1|	197	3e-50	Sec61 protein [Guillardia theta]	sp|Q870W0|SC61A_NEUCR	287	2e-77	Protein transport protein SEC61 subunit alpha OS=Neurospora crassa GN=sec-61 PE=3 SV=1	YLR378c	184	7e-47	COG0201	Preprotein translocase subunit SecY	K10956	2e-50	194	ppp:PHYPADRAFT_215299	protein transport protein SEC61 subunit alpha	GO:0006810//transport	-	GO:0043231//intracellular membrane-bounded organelle;GO:0016020//membrane
Unigene6552_All	517	14	0	1.1228	0	10.1329	up	3.86e-05	0.000462	--	--	--	--	--	--	--	--	--	--	--	--	--	--	--	--	--	--	-	-	-
Unigene38053_All	561	15	0	1.1087	0	10.1147	up	1.87e-05	0.000244	gi|302838125|ref|XP_002950621.1|	107	7e-23	metalloproteinase, extracellular matrix glycoprotein VMP22 [Volvox carteri f. nagariensis] >gi|300264170|gb|EFJ48367.1| metalloproteinase, extracellular matrix glycoprotein VMP22 [Volvox carteri f. nagariensis]	sp|Q01302|CCG6_NEUCR	102	2e-21	Clock-controlled protein 6 OS=Neurospora crassa GN=ccg-6 PE=2 SV=2	Rv3876	75.1	7e-14	COG0455	ATPases involved in chromosome partitioning	--	--	--	--	--	-	-	-
Unigene14881_All	525	14	0	1.1057	0	10.1107	up	3.86e-05	0.000464	gi|297835302|ref|XP_002885533.1|	72	4e-12	ADP-ribosylation factor C1 [Arabidopsis lyrata subsp. lyrata] >gi|297331373|gb|EFH61792.1| ADP-ribosylation factor C1 [Arabidopsis lyrata subsp. lyrata]	--	--	--	--	--	--	--	--	--	K07977	3e-13	72	ath:AT3G22950	Arf/Sar family, other	-	-	-
Unigene86505_All	530	14	0	1.0953	0	10.0971	up	3.86e-05	0.000461	gi|115464697|ref|NP_001055948.1|	86.7	1e-16	Os05g0498300 [Oryza sativa Japonica Group] >gi|113579499|dbj|BAF17862.1| Os05g0498300 [Oryza sativa Japonica Group]	--	--	--	--	--	--	--	--	--	K08741	5e-26	114	vvi:100252044	DNA mismatch repair protein MSH5	-	-	-
Unigene49283_All	495	13	0	1.0889	0	10.0887	up	7.96e-05	0.000878	gi|114432130|gb|ABI74673.1|	61.2	6e-09	suppressor of necrosis 1 [Phytophthora infestans]	sp|P25976|UBF1_MOUSE	59.3	1e-08	Nucleolar transcription factor 1 OS=Mus musculus GN=Ubtf PE=1 SV=1	YKR072c	55.8	3e-08	COG0452	Phosphopantothenoylcysteine synthetase/decarboxylase	K01785	7e-09	57.4	ath:AT5G15140	aldose 1-epimerase [EC:5.1.3.3]	-	-	-
Unigene31147_All	504	13	0	1.0695	0	10.0627	up	7.96e-05	0.000878	gi|317134913|gb|ADV03019.1|	131	5e-30	ribosomal protein L34 [Karlodinium veneficum]	sp|P40525|RL34B_YEAST	159	1e-38	60S ribosomal protein L34-B OS=Saccharomyces cerevisiae (strain ATCC 204508 / S288c) GN=RPL34B PE=1 SV=1	YIL052c	159	3e-39	COG2174	Ribosomal protein L34E	K02915	7e-33	137	cme:CMP012C	large subunit ribosomal protein L34e	-	-	-
Unigene73732_All	709	18	0	1.0527	0	10.0399	up	2.14e-06	3.42e-05	--	--	--	--	--	--	--	--	--	--	--	--	--	--	--	--	--	--	-	-	-
Unigene77202_All	715	18	0	1.0438	0	10.0276	up	2.14e-06	3.42e-05	gi|304654101|gb|EFM47493.1|	99.4	4e-20	PsSNEL4 [Phytophthora sojae]	sp|O36421|VG73_ALHV1	110	1e-23	Uncharacterized gene 73 protein OS=Alcelaphine herpesvirus 1 (strain C500) GN=73 PE=4 SV=1	YOR054c	97.4	2e-20	COG0452	Phosphopantothenoylcysteine synthetase/decarboxylase	K03243	3e-19	92.8	cre:CHLREDRAFT_141272	translation initiation factor IF-2 unclassified subunit	GO:0006810//transport;GO:0009987//cellular process;GO:0008152//metabolic process	GO:0003824//catalytic activity	GO:0044464//cell part
Unigene79463_All	646	16	0	1.027	0	10.0042	up	9.08e-06	0.000128	--	--	--	--	--	--	--	--	--	--	--	--	--	--	--	--	--	--	-	-	-
Unigene80949_All	533	13	0	1.0113	0	9.982	up	7.96e-05	0.000876	--	--	--	--	--	--	--	--	--	--	--	--	--	--	--	--	--	--	-	-	-
Unigene81093_All	623	15	0	0.9983	0	9.9633	up	1.87e-05	0.000244	gi|79375455|ref|NP_176975.2|	183	2e-45	2-oxoglutarate (2OG) and Fe(II)-dependent oxygenase domain-containing protein [Arabidopsis thaliana] >gi|56236062|gb|AAV84487.1| At1g68080 [Arabidopsis thaliana] >gi|58531340|gb|AAW78592.1| At1g68080 [Arabidopsis thaliana] >gi|71905461|gb|AAZ52708.1| expressed protein [Arabidopsis thaliana] >gi|332196623|gb|AEE34744.1| 2-oxoglutarate (2OG) and Fe(II)-dependent oxygenase domain-containing protein …	--	--	--	--	--	--	--	--	--	--	--	--	--	--	-	-	GO:0043231//intracellular membrane-bounded organelle
Unigene44173_All	794	19	0	0.9922	0	9.9545	up	1.04e-06	1.77e-05	--	--	--	--	--	--	--	--	--	--	--	--	--	--	--	--	--	--	-	-	-
Unigene76413_All	546	13	0	0.9872	0	9.9472	up	7.96e-05	0.000877	--	--	--	--	--	--	--	--	--	--	--	--	--	--	--	--	--	--	-	-	-
Unigene19185_All	548	13	0	0.9836	0	9.9419	up	7.96e-05	0.000879	--	--	--	--	--	--	--	--	--	--	--	--	--	--	--	--	--	--	-	-	-
Unigene7992_All	686	16	0	0.9671	0	9.9175	up	9.08e-06	0.000128	--	--	--	--	--	--	--	--	--	--	--	--	--	--	--	--	--	--	-	-	-
Unigene86475_All	606	14	0	0.9579	0	9.9037	up	3.86e-05	0.000461	gi|15219169|ref|NP_175713.1|	58.5	6e-08	protein kinase-like protein [Arabidopsis thaliana] >gi|9454540|gb|AAF87863.1|AC022520_7 similar to cdc2 protein kinase [Arabidopsis thaliana] >gi|332194763|gb|AEE32884.1| protein kinase-like protein [Arabidopsis thaliana]	--	--	--	--	--	--	--	--	--	--	--	--	--	--	GO:0009987//cellular process	GO:0004672//protein kinase activity;GO:0000166//nucleotide binding	GO:0016020//membrane
Unigene69525_All	741	17	0	0.9513	0	9.8938	up	4.4e-06	6.61e-05	--	--	--	--	--	--	--	--	--	--	--	--	--	--	--	--	--	--	-	-	-
Unigene46044_All	874	20	0	0.9488	0	9.89	up	5.02e-07	9.09e-06	gi|225434978|ref|XP_002281137.1|	247	2e-64	PREDICTED: similar to DHHC zinc finger domain containing protein [Vitis vinifera]	sp|Q5KP49|AKR1_CRYNE	63.2	2e-09	Palmitoyltransferase AKR1 OS=Cryptococcus neoformans GN=AKR1 PE=3 SV=1	YLR246w	55.8	9e-08	COG5273	Uncharacterized protein containing DHHC-type Zn finger	--	--	--	--	--	-	-	-
Unigene52836_All	659	15	0	0.9438	0	9.8823	up	1.87e-05	0.000244	gi|223452424|gb|ACM89539.1|	89.7	3e-17	protein kinase family protein [Glycine max]	sp|Q8VYY5|NCRK_ARATH	75.5	3e-13	Receptor-like serine/threonine-protein kinase NCRK OS=Arabidopsis thaliana GN=NCRK PE=1 SV=1	--	--	--	--	--	--	--	--	--	--	GO:0010087//phloem or xylem histogenesis	GO:0016740//transferase activity	GO:0043231//intracellular membrane-bounded organelle
Unigene85465_All	626	14	0	0.9273	0	9.8569	up	3.86e-05	0.000461	gi|115473095|ref|NP_001060146.1|	114	1e-24	Os07g0588800 [Oryza sativa Japonica Group] >gi|28564818|dbj|BAC57747.1| cytoplasmic protein of eukaryotic origin (38.3 kD)-like [Oryza sativa Japonica Group] >gi|113611682|dbj|BAF22060.1| Os07g0588800 [Oryza sativa Japonica Group]	sp|Q54II8|U553_DICDI	70.1	1e-11	UPF0553 protein OS=Dictyostelium discoideum GN=DDB_G0288723 PE=3 SV=1	--	--	--	--	--	--	--	--	--	--	-	-	-
Unigene19642_All	642	14	0	0.9042	0	9.8205	up	3.86e-05	0.000463	--	--	--	--	--	--	--	--	--	--	--	--	--	--	--	--	--	--	-	-	-
Unigene36368_All	687	14	0	0.845	0	9.7228	up	3.86e-05	0.000463	--	--	--	--	--	--	--	--	--	--	--	--	--	--	--	--	--	--	-	-	-
Unigene24754_All	644	13	0	0.837	0	9.7091	up	7.96e-05	0.000879	--	--	--	--	--	--	--	--	--	--	--	--	--	--	--	--	--	--	-	-	-
Unigene11964_All	999	20	0	0.8301	0	9.6971	up	5.02e-07	9.1e-06	gi|3695393|gb|AAC62795.1|	94.4	2e-20	contains similarity to retroviral aspartyl proteases (Pfam: rvp.hmm, score: 11.80) [Arabidopsis thaliana]	sp|P25601|YCH5_YEAST	52	7e-06	Putative transposon Ty5-1 protein YCL075W OS=Saccharomyces cerevisiae (strain ATCC 204508 / S288c) GN=TY5B PE=5 SV=1	--	--	--	--	--	--	--	--	--	--	-	GO:0005488//binding	-
Unigene5973_All	651	13	0	0.828	0	9.6935	up	7.96e-05	0.000877	--	--	--	--	--	--	--	--	--	--	--	--	--	--	--	--	--	--	-	-	-
Unigene2056_All	708	14	0	0.8199	0	9.6793	up	3.86e-05	0.000463	gi|5903052|gb|AAD55611.1|AC008016_21	177	2e-43	Contains PF|00561 alpha/beta hydrolase fold [Arabidopsis thaliana]	--	--	--	--	all1353	73.2	4e-13	COG0596	Predicted hydrolases or acyltransferases (alpha/beta hydrolase superfamily)	--	--	--	--	--	-	GO:0004672//protein kinase activity;GO:0019120//hydrolase activity, acting on acid halide bonds, in C-halide compounds	GO:0009526//plastid envelope
Unigene49635_All	712	14	0	0.8153	0	9.6712	up	3.86e-05	0.000463	gi|219116506|ref|XP_002179048.1|	108	5e-23	long chain acyl-coa elongase [Phaeodactylum tricornutum CCAP 1055/1] >gi|217409815|gb|EEC49746.1| long chain acyl-coa elongase [Phaeodactylum tricornutum CCAP 1055/1]	sp|Q54TC9|SRE1_DICDI	76.3	2e-13	Elongation of fatty acids protein sre1 OS=Dictyostelium discoideum GN=sre1 PE=2 SV=1	--	--	--	--	--	K03006	2e-06	50.4	sbi:SORBI_07g003680	DNA-directed RNA polymerase II subunit A [EC:2.7.7.6]	-	-	-
Unigene72817_All	729	14	0	0.7963	0	9.6372	up	3.86e-05	0.000462	--	--	--	--	--	--	--	--	--	--	--	--	--	--	--	--	--	--	-	-	-
Unigene30314_All	733	14	0	0.7919	0	9.6292	up	3.86e-05	0.000463	--	--	--	--	--	--	--	--	--	--	--	--	--	--	--	--	--	--	-	-	-
Unigene67492_All	743	14	0	0.7813	0	9.6097	up	3.86e-05	0.000462	--	--	--	--	--	--	--	--	--	--	--	--	--	--	--	--	--	--	-	-	-
Unigene24543_All	801	15	0	0.7765	0	9.6008	up	1.87e-05	0.000244	gi|7271117|emb|CAB81546.1|	57	3e-07	25.7 kDa protein [Cicer arietinum]	--	--	--	--	--	--	--	--	--	--	--	--	--	--	-	-	-
Unigene16619_All	1160	19	0	0.6791	0	9.4075	up	1.04e-06	1.77e-05	gi|225432153|ref|XP_002265997.1|	89.4	9e-17	PREDICTED: similar to catalytic [Vitis vinifera]	--	--	--	--	--	--	--	--	--	--	--	--	--	--	-	-	-
Unigene37250_All	998	16	0	0.6647	0	9.3766	up	9.08e-06	0.000128	gi|114794826|pdb|2IX6|A	222	2e-97	Chain A, Short Chain Specific Acyl-Coa Oxidase From Arabidopsis Thaliana, Acx4 >gi|114794827|pdb|2IX6|B Chain B, Short Chain Specific Acyl-Coa Oxidase From Arabidopsis Thaliana, Acx4 >gi|114794828|pdb|2IX6|C Chain C, Short Chain Specific Acyl-Coa Oxidase From Arabidopsis Thaliana, Acx4 >gi|114794829|pdb|2IX6|D Chain D, Short Chain Specific Acyl-Coa Oxidase From Arabidopsis Thaliana, Acx4 >gi|1147…	sp|Q96329|ACOX4_ARATH	222	9e-98	Acyl-coenzyme A oxidase 4, peroxisomal OS=Arabidopsis thaliana GN=ACX4 PE=1 SV=1	DR0551	89.7	5e-30	COG1960	Acyl-CoA dehydrogenases	K00232	3e-100	234	rcu:RCOM_0186930	acyl-CoA oxidase [EC:1.3.3.6]	GO:0009062//fatty acid catabolic process;GO:0003006//reproductive developmental process	GO:0030554//adenyl nucleotide binding;GO:0016634	GO:0042579//microbody
Unigene75157_All	888	14	0	0.6537	0	9.3525	up	3.86e-05	0.000462	gi|115458346|ref|NP_001052773.1|	72	1e-11	Os04g0418800 [Oryza sativa Japonica Group] >gi|113564344|dbj|BAF14687.1| Os04g0418800 [Oryza sativa Japonica Group]	sp|Q9SX31|PERK9_ARATH	61.6	7e-09	Proline-rich receptor-like protein kinase PERK9 OS=Arabidopsis thaliana GN=PERK9 PE=2 SV=1	Rv3876	51.2	2e-06	COG0455	ATPases involved in chromosome partitioning	--	--	--	--	--	-	-	-
Unigene17043_All	968	14	0	0.5997	0	9.2281	up	3.86e-05	0.000463	gi|15242253|ref|NP_197638.1|	107	2e-22	esterase/lipase/thioesterase family protein [Arabidopsis thaliana] >gi|30688480|ref|NP_851055.1| esterase/lipase/thioesterase family protein [Arabidopsis thaliana] >gi|332005646|gb|AED93029.1| esterase/lipase/thioesterase family protein [Arabidopsis thaliana] >gi|332005647|gb|AED93030.1| esterase/lipase/thioesterase family protein [Arabidopsis thaliana]	--	--	--	--	--	--	--	--	--	--	--	--	--	--	-	-	-
Unigene41625_All	994	13	0	0.5423	0	9.0829	up	7.96e-05	0.000878	gi|18390573|ref|NP_563749.1|	61.2	2e-08	transcription factor bHLH128 [Arabidopsis thaliana] >gi|75299737|sp|Q8H102.1|BH128_ARATH RecName: Full=Transcription factor bHLH128; AltName: Full=Basic helix-loop-helix protein 128; Short=AtbHLH128; Short=bHLH 128; AltName: Full=Transcription factor EN 74; AltName: Full=bHLH transcription factor bHLH128 >gi|332189775|gb|AEE27896.1| transcription factor bHLH128 [Arabidopsis thaliana]	sp|Q8H102|BH128_ARATH	61.2	1e-08	Transcription factor bHLH128 OS=Arabidopsis thaliana GN=BHLH128 PE=1 SV=1	--	--	--	--	--	--	--	--	--	--	-	-	-
Unigene43824_All	1118	14	0	0.5192	0	9.0201	up	3.86e-05	0.000463	gi|115444213|ref|NP_001045886.1|	60.8	3e-08	Os02g0147700 [Oryza sativa Japonica Group] >gi|113535417|dbj|BAF07800.1| Os02g0147700 [Oryza sativa Japonica Group]	sp|Q55FI4|NOP58_DICDI	68.6	8e-11	Nucleolar protein 58 OS=Dictyostelium discoideum GN=nop58 PE=3 SV=1	--	--	--	--	--	K11294	4e-06	50.1	vvi:100262769	nucleolin	-	-	-
Unigene56192_All	1216	14	0	0.4774	0	8.8991	up	3.86e-05	0.000462	gi|145228023|gb|ABP48736.1|	133	5e-30	glutaredoxin [Ipomoea batatas]	sp|Q8L8T2|GRXC1_ARATH	127	2e-28	Glutaredoxin-C1 OS=Arabidopsis thaliana GN=GRXC1 PE=2 SV=2	YDR513w	69.3	1e-11	COG0695	Glutaredoxin and related proteins	K03676	8e-30	129	vvi:100260385	glutaredoxin 3	-	-	-
Unigene28762_All	1281	14	0	0.4532	0	8.824	up	3.86e-05	0.000463	gi|30678254|ref|NP_671784.2|	164	3e-60	acyl-CoA N-acyltransferases-like protein [Arabidopsis thaliana] >gi|330250902|gb|AEC05996.1| acyl-CoA N-acyltransferases-like protein [Arabidopsis thaliana]	--	--	--	--	--	--	--	--	--	--	--	--	--	--	-	GO:0016407//acetyltransferase activity	GO:0043231//intracellular membrane-bounded organelle
Unigene32758_All	1474	16	0	0.4501	0	8.8141	up	9.08e-06	0.000128	gi|224142049|ref|XP_002324371.1|	217	3e-55	glutamate-gated kainate-type ion channel receptor subunit GluR5 [Populus trichocarpa] >gi|222865805|gb|EEF02936.1| glutamate-gated kainate-type ion channel receptor subunit GluR5 [Populus trichocarpa]	sp|Q9LFN8|GLR26_ARATH	209	6e-53	Glutamate receptor 2.6 OS=Arabidopsis thaliana GN=GLR2.6 PE=2 SV=2	--	--	--	--	--	K05387	8e-54	209	ath:AT5G11210	glutamate receptor, ionotropic, other eukaryote	-	-	GO:0044464//cell part
Unigene43140_All	1312	14	0	0.4424	0	8.7892	up	3.86e-05	0.000463	gi|297812787|ref|XP_002874277.1|	348	8e-95	rhomboid family protein [Arabidopsis lyrata subsp. lyrata] >gi|297320114|gb|EFH50536.1| rhomboid family protein [Arabidopsis lyrata subsp. lyrata]	sp|P46116|AARA_PROST	57.8	2e-07	Rhomboid protease AarA OS=Providencia stuartii GN=aarA PE=1 SV=1	TM0584	73.9	6e-13	COG0705	Uncharacterized membrane protein (homolog of Drosophila rhomboid)	K07059	1e-56	218	olu:OSTLU_26597		-	GO:0046872//metal ion binding;GO:0003824//catalytic activity	GO:0031224//intrinsic to membrane;GO:0009536//plastid
Unigene18253_All	1284	13	0	0.4198	0	8.7136	up	7.96e-05	0.000879	--	--	--	--	--	--	--	--	--	--	--	--	--	--	--	--	--	--	-	-	-
Unigene1241_All	1391	14	0	0.4173	0	8.7049	up	3.86e-05	0.000464	gi|11545539|gb|AAG37899.1|	169	1e-40	MADS-box protein AGL16 [Arabidopsis thaliana]	sp|Q6EP49|MAD27_ORYSJ	149	5e-35	MADS-box transcription factor 27 OS=Oryza sativa subsp. japonica GN=MADS27 PE=2 SV=2	--	--	--	--	--	K09264	2e-30	131	ath:AT2G14210	MADS-box transcription factor, plant	GO:0010468//regulation of gene expression;GO:0006351//transcription, DNA-dependent;GO:0010374//stomatal complex development	GO:0003677//DNA binding;GO:0001071;GO:0016628//oxidoreductase activity, acting on the CH-CH group of donors, NAD or NADP as acceptor	GO:0043231//intracellular membrane-bounded organelle
Unigene20311_All	1360	142	2	4.3293	0.0574	6.2369	up	6.38e-42	9.55e-40	gi|283050393|gb|ABN71233.2|	323	5e-87	catalase [Oryza sativa Indica Group]	sp|Q9C168|CAT1_NEUCR	747	0	Catalase-1 OS=Neurospora crassa GN=cat-1 PE=1 SV=2	DRA0259	509	6e-144	COG0753	Catalase	K03781	1e-87	321	osa:4328073	catalase [EC:1.11.1.6]	-	-	-
Unigene75030_All	476	53	1	4.6168	0.082	5.8151	up	6.15e-16	2.98e-14	--	--	--	--	--	--	--	--	--	--	--	--	--	--	--	--	--	--	-	-	-
Unigene12005_All	416	83	2	8.2728	0.1877	5.4619	up	7.88e-24	5.96e-22	--	--	--	--	--	--	--	--	--	--	--	--	--	--	--	--	--	--	-	-	-
Unigene87729_All	325	36	1	4.5929	0.1201	5.2571	up	9.43e-11	2.87e-09	--	--	--	--	--	--	--	--	--	--	--	--	--	--	--	--	--	--	-	-	-
Unigene40025_All	815	612	17	31.1359	0.8144	5.2567	up	4.93e-165	3.3e-162	gi|31879434|dbj|BAC77695.1|	57.8	2e-07	salt-induced protein [Atriplex nummularia]	--	--	--	--	--	--	--	--	--	--	--	--	--	--	-	-	-
Unigene37695_All	497	36	1	3.0034	0.0786	5.2559	up	9.43e-11	2.88e-09	--	--	--	--	--	--	--	--	--	--	--	--	--	--	--	--	--	--	-	-	-
Unigene32441_All	374	35	1	3.8803	0.1044	5.216	up	1.89e-10	5.58e-09	gi|6094077|sp|O82713.1|RL41_QUESU	51.6	3e-06	RecName: Full=60S ribosomal protein L41 >gi|3492819|emb|CAA04691.1| RPL41 [Quercus suber]	sp|P05746|RL41_YEAST	51.6	1e-06	60S ribosomal protein L41 OS=Saccharomyces cerevisiae (strain ATCC 204508 / S288c) GN=RPL41A PE=1 SV=1	--	--	--	--	--	K02928	5e-06	47	cre:CHLREDRAFT_195610	large subunit ribosomal protein L41e	-	-	-
Unigene34794_All	563	139	4	10.237	0.2774	5.2057	up	2.48e-38	3.29e-36	gi|115488946|ref|NP_001066960.1|	55.5	4e-07	Os12g0542200 [Oryza sativa Japonica Group] >gi|113649467|dbj|BAF29979.1| Os12g0542200 [Oryza sativa Japonica Group]	sp|P98088|MUC5A_HUMAN	59.3	2e-08	Mucin-5AC (Fragments) OS=Homo sapiens GN=MUC5AC PE=1 SV=3	--	--	--	--	--	--	--	--	--	--	-	-	-
Unigene37139_All	454	99	3	9.0416	0.258	5.1311	up	1.85e-27	1.64e-25	--	--	--	--	--	--	--	--	--	--	--	--	--	--	--	--	--	--	-	-	-
Unigene87261_All	725	32	1	1.8301	0.0539	5.0855	up	1.53e-09	4.05e-08	gi|224012829|ref|XP_002295067.1|	134	1e-30	sur1-like protein [Thalassiosira pseudonana CCMP1335] >gi|220969506|gb|EED87847.1| sur1-like protein [Thalassiosira pseudonana CCMP1335]	sp|P38287|CSH1_YEAST	175	2e-43	Mannosyl phosphorylinositol ceramide synthase CSH1 OS=Saccharomyces cerevisiae (strain ATCC 204508 / S288c) GN=CSH1 PE=1 SV=1	YBR161w	175	6e-44	COG3774	Mannosyltransferase OCH1 and related enzymes	--	--	--	--	--	-	-	-
Unigene24484_All	551	62	2	4.6656	0.1417	5.0412	up	1.8e-17	9.66e-16	--	--	--	--	--	--	--	--	--	--	--	--	--	--	--	--	--	--	-	-	-
Unigene13343_All	481	31	1	2.6723	0.0812	5.0405	up	3.06e-09	7.8e-08	gi|195547011|dbj|BAG68286.1|	75.1	3e-13	chitin-binding lectin precursor [Solanum lycopersicum var. cerasiforme]	sp|Q02817|MUC2_HUMAN	81.3	3e-15	Mucin-2 OS=Homo sapiens GN=MUC2 PE=1 SV=2	Rv3876	60.5	1e-09	COG0455	ATPases involved in chromosome partitioning	--	--	--	--	--	-	-	-
Unigene18864_All	1678	175	6	4.3243	0.1396	4.9531	up	8.65e-47	1.48e-44	--	--	--	--	--	--	--	--	--	--	--	--	--	--	--	--	--	--	-	-	-
Unigene38301_All	251	168	6	27.7526	0.9333	4.8941	up	1.08e-44	1.75e-42	--	--	--	--	--	--	--	--	--	--	--	--	--	--	--	--	--	--	-	-	-
Unigene75466_All	506	28	1	2.2944	0.0772	4.8934	up	2.45e-08	5.52e-07	gi|308810629|ref|XP_003082623.1|	135	2e-31	Cytochrome b5 (ISS) [Ostreococcus tauri] >gi|116061092|emb|CAL56480.1| Cytochrome b5 (ISS) [Ostreococcus tauri]	sp|P21375|OSM1_YEAST	108	2e-23	Osmotic growth protein 1 OS=Saccharomyces cerevisiae (strain ATCC 204508 / S288c) GN=OSM1 PE=1 SV=3	SPAC17A2.05	140	8e-34	COG1053	Succinate dehydrogenase/fumarate reductase, flavoprotein subunit	--	--	--	--	--	-	-	-
Unigene66240_All	989	56	2	2.3478	0.079	4.8933	up	1.14e-15	5.43e-14	gi|297819414|ref|XP_002877590.1|	390	1e-107	ALDH2B4 [Arabidopsis lyrata subsp. lyrata] >gi|297323428|gb|EFH53849.1| ALDH2B4 [Arabidopsis lyrata subsp. lyrata]	sp|P40108|ALDH_DAVTA	588	3e-167	Aldehyde dehydrogenase OS=Davidiella tassiana GN=CLAH10 PE=1 SV=2	SPAC9E9.09c	437	2e-122	COG1012	NAD-dependent aldehyde dehydrogenases	K00128	1e-110	397	zma:100382968	aldehyde dehydrogenase (NAD+) [EC:1.2.1.3]	-	-	-
Unigene81297_All	269	27	1	4.1618	0.1451	4.8421	up	4.88e-08	1.05e-06	--	--	--	--	--	--	--	--	--	--	--	--	--	--	--	--	--	--	-	-	-
Unigene52097_All	445	54	2	5.0315	0.1755	4.8414	up	4.53e-15	2.06e-13	gi|307136482|gb|ADN34283.1|	54.7	4e-07	ATP binding protein [Cucumis melo subsp. melo]	sp|Q02817|MUC2_HUMAN	53.9	4e-10	Mucin-2 OS=Homo sapiens GN=MUC2 PE=1 SV=2	--	--	--	--	--	--	--	--	--	--	-	-	-
Unigene38584_All	425	27	1	2.6342	0.0919	4.8412	up	4.88e-08	1.05e-06	--	--	--	--	sp|Q06405|ATPK_YEAST	89	9e-18	ATP synthase subunit f, mitochondrial OS=Saccharomyces cerevisiae (strain ATCC 204508 / S288c) GN=ATP17 PE=1 SV=1	--	--	--	--	--	--	--	--	--	--	-	-	-
Unigene36270_All	710	105	4	6.132	0.22	4.8008	up	4.07e-28	3.72e-26	--	--	--	--	sp|Q01358|BLI3_NEUCR	259	1e-68	Protein bli-3 OS=Neurospora crassa GN=bli-3 PE=2 SV=1	DR1146	55.8	7e-08	COG3871	Uncharacterized stress protein (general stress protein 26)	--	--	--	--	--	-	-	-
Unigene78526_All	505	52	2	4.2695	0.1546	4.7875	up	1.79e-14	7.82e-13	--	--	--	--	--	--	--	--	--	--	--	--	--	--	--	--	--	--	-	-	-
Unigene90341_All	208	26	1	5.183	0.1877	4.7873	up	9.74e-08	2e-06	--	--	--	--	--	--	--	--	--	--	--	--	--	--	--	--	--	--	-	-	-
Unigene51126_All	339	26	1	3.1801	0.1152	4.7869	up	9.74e-08	2e-06	gi|226509046|ref|NP_001151268.1|	69.3	1e-11	LOC100284901 [Zea mays] >gi|195609716|gb|ACG26688.1| 60S ribosomal protein L28 [Zea mays] >gi|195610086|gb|ACG26873.1| 60S ribosomal protein L28 [Zea mays] >gi|195645410|gb|ACG42173.1| 60S ribosomal protein L28 [Zea mays] >gi|195646860|gb|ACG42898.1| 60S ribosomal protein L28 [Zea mays]	sp|O14069|RL28E_SCHPO	93.2	5e-19	Probable 60S ribosomal protein L28e OS=Schizosaccharomyces pombe (strain ATCC 38366 / 972) GN=rpl28e PE=1 SV=1	--	--	--	--	--	K02903	2e-17	84.7	ppp:PHYPADRAFT_49186	large subunit ribosomal protein L28e	-	-	-
Unigene89430_All	482	75	3	6.4518	0.243	4.7307	up	2.91e-20	1.83e-18	gi|115459228|ref|NP_001053214.1|	60.8	7e-09	Os04g0498700 [Oryza sativa Japonica Group] >gi|38345395|emb|CAD41241.2| OSJNBa0067K08.24 [Oryza sativa Japonica Group] >gi|113564785|dbj|BAF15128.1| Os04g0498700 [Oryza sativa Japonica Group]	sp|Q8NIN9|HYP1_DAVTA	155	8e-38	Hydrophobin-1 OS=Davidiella tassiana GN=HCh-1 PE=1 SV=1	CC3441	48.1	7e-06	COG2267	Lysophospholipase	K12447	2e-07	52.4	cre:CHLREDRAFT_32796	UDP-sugar pyrophosphorylase [EC:2.7.7.64]	-	-	-
Unigene22908_All	588	50	2	3.5258	0.1328	4.7306	up	7.09e-14	2.93e-12	--	--	--	--	--	--	--	--	--	--	--	--	--	--	--	--	--	--	-	-	-
Unigene135080_All	331	25	1	3.1317	0.118	4.7301	up	1.94e-07	3.79e-06	gi|3482913|gb|AAC33198.1|	43.9	5e-11	Similar to MtN21, gi|2598575, Megicago truncatula nodulation induced gene [Arabidopsis thaliana]	--	--	--	--	--	--	--	--	--	--	--	--	--	--	-	-	-
Unigene60339_All	624	25	1	1.6612	0.0626	4.7299	up	1.94e-07	3.79e-06	--	--	--	--	--	--	--	--	--	--	--	--	--	--	--	--	--	--	-	-	-
Unigene62022_All	379	49	2	5.3607	0.206	4.7017	up	1.41e-13	5.66e-12	gi|3219280|dbj|BAA28834.1|	74.3	4e-13	delta-9 fatty acid desaturase [Cyanidioschyzon merolae]	sp|Q12618|ACO1_AJECA	126	4e-29	Acyl-CoA desaturase OS=Ajellomyces capsulata GN=OLE1 PE=3 SV=1	SPCC1281.06c_1	103	8e-23	COG1398	Fatty-acid desaturase	K00507	1e-28	122	zma:100382970	stearoyl-CoA desaturase (delta-9 desaturase) [EC:1.14.19.1]	GO:0006629//lipid metabolic process	GO:0016717//oxidoreductase activity, acting on paired donors, with oxidation of a pair of donors resulting in the reduction of molecular oxygen to two molecules of water;GO:0005506//iron ion binding	GO:0016020//membrane
Unigene13621_All	1585	24	1	0.6278	0.0246	4.6736	up	3.85e-07	7.13e-06	gi|281410942|gb|ADA68879.1|	491	1e-137	thylakoid ascorbate peroxidase precursor [Suaeda salsa]	sp|Q42592|APXS_ARATH	376	3e-103	L-ascorbate peroxidase S, chloroplastic/mitochondrial OS=Arabidopsis thaliana GN=APXS PE=1 SV=2	YKR066c	123	8e-28	COG0376	Catalase (peroxidase I)	K00434	2e-103	374	ath:AT4G08390	L-ascorbate peroxidase [EC:1.11.1.11]	-	-	-
Unigene30025_All	975	24	1	1.0206	0.04	4.6733	up	3.85e-07	7.13e-06	gi|224119014|ref|XP_002331304.1|	283	3e-75	bile acid:Na+ symporter family protein [Populus trichocarpa] >gi|222873887|gb|EEF11018.1| bile acid:Na+ symporter family protein [Populus trichocarpa]	sp|O34524|YOCS_BACSU	107	1e-22	Uncharacterized sodium-dependent transporter yocS OS=Bacillus subtilis GN=yocS PE=3 SV=1	BH0858	119	1e-26	COG0385	Predicted Na+-dependent transporter	K03453	1e-78	290	rcu:RCOM_0494130	bile acid:Na+ symporter, BASS family	GO:0030001//metal ion transport	GO:0005343//organic acid:sodium symporter activity	GO:0009536//plastid
Unigene51372_All	253	24	1	3.9333	0.1543	4.6719	up	3.85e-07	7.13e-06	--	--	--	--	--	--	--	--	--	--	--	--	--	--	--	--	--	--	-	-	-
Unigene52388_All	878	24	1	1.1334	0.0445	4.6707	up	3.85e-07	7.12e-06	gi|156122742|gb|ABU50328.1|	95.5	8e-19	diacylglycerol acyltransferase [Helianthus annuus]	sp|Q9ASU1|DGAT2_ARATH	87	2e-16	Diacylglycerol O-acyltransferase 2 OS=Arabidopsis thaliana GN=DGAT2 PE=2 SV=1	--	--	--	--	--	--	--	--	--	--	-	GO:0016411//acylglycerol O-acyltransferase activity	-
Unigene89318_All	311	23	1	3.0664	0.1255	4.6108	up	7.65e-07	1.34e-05	--	--	--	--	--	--	--	--	--	--	--	--	--	--	--	--	--	--	-	-	-
Unigene52200_All	401	46	2	4.7564	0.1947	4.6105	up	1.1e-12	4.06e-11	--	--	--	--	--	--	--	--	--	--	--	--	--	--	--	--	--	--	-	-	-
Unigene50332_All	350	22	1	2.6063	0.1115	4.5469	up	1.52e-06	2.51e-05	gi|219123892|ref|XP_002182250.1|	128	2e-29	ubiquitin extension protein 1/2 [Phaeodactylum tricornutum CCAP 1055/1] >gi|217406211|gb|EEC46151.1| ubiquitin extension protein 1/2 [Phaeodactylum tricornutum CCAP 1055/1]	sp|P0CH09|RL402_YEAST	146	4e-35	Ubiquitin-60S ribosomal protein L40 OS=Saccharomyces cerevisiae (strain ATCC 204508 / S288c) GN=RPL40B PE=1 SV=1	YKR094c_2	114	6e-26	COG1552	Ribosomal protein L40E	K02927	2e-30	127	osa:4332169	large subunit ribosomal protein L40e	-	-	-
Unigene10691_All	290	22	1	3.1455	0.1346	4.5465	up	1.52e-06	2.51e-05	--	--	--	--	--	--	--	--	--	--	--	--	--	--	--	--	--	--	-	-	-
Unigene65189_All	370	22	1	2.4654	0.1055	4.5465	up	1.52e-06	2.51e-05	--	--	--	--	--	--	--	--	--	--	--	--	--	--	--	--	--	--	-	-	-
Unigene23101_All	638	44	2	2.8596	0.1224	4.5461	up	4.3e-12	1.5e-10	gi|159465411|ref|XP_001690916.1|	83.2	2e-15	extracellular matrix protein [Chlamydomonas reinhardtii] >gi|158279602|gb|EDP05362.1| extracellular matrix protein [Chlamydomonas reinhardtii]	sp|P38248|ECM33_YEAST	138	3e-32	Cell wall protein ECM33 OS=Saccharomyces cerevisiae (strain ATCC 204508 / S288c) GN=ECM33 PE=1 SV=3	SPBC28F2.12	73.2	3e-13	COG0086	DNA-directed RNA polymerase, beta' subunit/160 kD subunit	K03006	2e-13	73.2	rcu:RCOM_0782880	DNA-directed RNA polymerase II subunit A [EC:2.7.7.6]	-	-	-
Unigene56287_All	696	22	1	1.3106	0.0561	4.5461	up	1.52e-06	2.51e-05	gi|11496133|gb|AAG36666.1|	276	2e-73	oxalate oxidase-like germin 171 [Beta vulgaris]	sp|Q9ZRA4|AB19A_PRUPE	200	9e-51	Auxin-binding protein ABP19a OS=Prunus persica GN=ABP19A PE=3 SV=1	--	--	--	--	--	--	--	--	--	--	-	-	-
Unigene39504_All	718	172	8	9.9328	0.435	4.5131	up	1.07e-43	1.67e-41	gi|302843366|ref|XP_002953225.1|	55.5	7e-07	hypothetical protein VOLCADRAFT_63308 [Volvox carteri f. nagariensis] >gi|300261612|gb|EFJ45824.1| hypothetical protein VOLCADRAFT_63308 [Volvox carteri f. nagariensis]	sp|Q9UTI9|YKZ2_SCHPO	94.7	5e-19	UPF0591 membrane protein C15E1.02c OS=Schizosaccharomyces pombe (strain ATCC 38366 / 972) GN=SPAC15E1.02c PE=2 SV=1	--	--	--	--	--	--	--	--	--	--	-	-	-
Unigene65029_All	308	129	6	17.3663	0.7606	4.513	up	4.25e-33	4.73e-31	gi|303278848|ref|XP_003058717.1|	87.8	4e-17	ribosomal protein [Micromonas pusilla CCMP1545] >gi|226459877|gb|EEH57172.1| ribosomal protein [Micromonas pusilla CCMP1545]	sp|Q12087|RS30_YEAST	101	1e-21	40S ribosomal protein S30 OS=Saccharomyces cerevisiae (strain ATCC 204508 / S288c) GN=RPS30A PE=1 SV=2	--	--	--	--	--	K02983	5e-18	86.7	cre:CHLREDRAFT_132716	small subunit ribosomal protein S30e	GO:0010467//gene expression	GO:0005198//structural molecule activity	GO:0043231//intracellular membrane-bounded organelle;GO:0030529//ribonucleoprotein complex
Unigene80613_All	464	21	1	1.8766	0.0841	4.4799	up	3e-06	4.68e-05	--	--	--	--	--	--	--	--	--	--	--	--	--	--	--	--	--	--	-	-	-
Unigene88633_All	380	21	1	2.2914	0.1027	4.4797	up	3e-06	4.67e-05	--	--	--	--	--	--	--	--	--	--	--	--	--	--	--	--	--	--	-	-	-
Unigene82739_All	280	21	1	3.1098	0.1394	4.4795	up	3e-06	4.68e-05	gi|158828138|gb|ABW81017.1|	48.1	3e-09	gag-pol polymerase [Arabidopsis lyrata subsp. lyrata]	--	--	--	--	--	--	--	--	--	--	--	--	--	--	-	GO:0005488//binding	-
Unigene84092_All	321	21	1	2.7126	0.1216	4.4795	up	3e-06	4.67e-05	--	--	--	--	--	--	--	--	--	--	--	--	--	--	--	--	--	--	-	-	-
Unigene61771_All	727	63	3	3.5931	0.1611	4.4792	up	1.05e-16	5.38e-15	gi|226498348|ref|NP_001148765.1|	93.6	2e-18	endo-1,3;1,4-beta-D-glucanase [Zea mays] >gi|195621988|gb|ACG32824.1| endo-1,3;1,4-beta-D-glucanase precursor [Zea mays]	sp|O14359|YB4E_SCHPO	115	4e-25	Uncharacterized AIM2 family protein C30D10.14 OS=Schizosaccharomyces pombe (strain ATCC 38366 / 972) GN=SPBC30D10.14 PE=2 SV=1	SPBC30D10.14	115	1e-25	COG0412	Dienelactone hydrolase and related enzymes	--	--	--	--	--	-	-	-
Unigene61533_All	368	21	1	2.3661	0.1061	4.479	up	3e-06	4.68e-05	--	--	--	--	--	--	--	--	--	--	--	--	--	--	--	--	--	--	-	-	-
Unigene87915_All	500	21	1	1.7415	0.0781	4.4789	up	3e-06	4.67e-05	gi|219124318|ref|XP_002182454.1|	104	4e-22	transketolase [Phaeodactylum tricornutum CCAP 1055/1] >gi|217406415|gb|EEC46355.1| transketolase [Phaeodactylum tricornutum CCAP 1055/1]	sp|O94039|TKT1_CANAL	146	6e-35	Transketolase 1 OS=Candida albicans GN=TKT1 PE=3 SV=1	SPBC2G5.05	135	3e-32	COG0021	Transketolase	K00615	4e-14	74.7	zma:100279513	transketolase [EC:2.2.1.1]	-	-	-
Unigene53299_All	318	21	1	2.7382	0.1228	4.4788	up	3e-06	4.68e-05	--	--	--	--	--	--	--	--	--	--	--	--	--	--	--	--	--	--	-	-	-
Unigene64701_All	415	21	1	2.0982	0.0941	4.4788	up	3e-06	4.68e-05	gi|33636084|emb|CAD91335.1|	60.1	8e-09	monosaccharide transporter [Glycine max]	sp|P39932|STL1_YEAST	100	2e-21	Sugar transporter STL1 OS=Saccharomyces cerevisiae (strain ATCC 204508 / S288c) GN=STL1 PE=1 SV=2	SPAC1348.14c	57.4	7e-09	COG0477	Permeases of the major facilitator superfamily	--	--	--	--	--	-	-	-
Unigene39648_All	402	41	2	4.2289	0.1942	4.4447	up	3.3e-11	1.06e-09	--	--	--	--	--	--	--	--	--	--	--	--	--	--	--	--	--	--	-	-	-
Unigene12845_All	331	81	4	10.1467	0.4718	4.4267	up	5.29e-21	3.46e-19	gi|226495039|ref|NP_001141249.1|	73.2	1e-12	hypothetical protein LOC100273336 [Zea mays] >gi|194703524|gb|ACF85846.1| unknown [Zea mays]	sp|Q01302|CCG6_NEUCR	60.5	3e-09	Clock-controlled protein 6 OS=Neurospora crassa GN=ccg-6 PE=2 SV=2	--	--	--	--	--	--	--	--	--	--	-	-	-
Unigene75460_All	446	20	1	1.8594	0.0875	4.4094	up	5.93e-06	8.66e-05	gi|115466616|ref|NP_001056907.1|	52.4	2e-06	Os06g0165300 [Oryza sativa Japonica Group] >gi|113594947|dbj|BAF18821.1| Os06g0165300 [Oryza sativa Japonica Group]	--	--	--	--	--	--	--	--	--	--	--	--	--	--	-	-	-
Unigene87524_All	501	20	1	1.6552	0.0779	4.4092	up	5.93e-06	8.66e-05	--	--	--	--	--	--	--	--	--	--	--	--	--	--	--	--	--	--	-	-	-
Unigene87419_All	234	20	1	3.5439	0.1668	4.4091	up	5.93e-06	8.66e-05	--	--	--	--	--	--	--	--	--	--	--	--	--	--	--	--	--	--	-	-	-
Unigene87008_All	330	20	1	2.513	0.1183	4.4089	up	5.93e-06	8.66e-05	gi|15228502|ref|NP_189526.1|	55.1	3e-07	uncharacterized protein [Arabidopsis thaliana] >gi|115646811|gb|ABJ17126.1| At3g28840 [Arabidopsis thaliana] >gi|332643974|gb|AEE77495.1| uncharacterized protein [Arabidopsis thaliana]	--	--	--	--	--	--	--	--	--	--	--	--	--	--	-	-	-
Unigene62569_All	624	39	2	2.5915	0.1251	4.3726	up	1.28e-10	3.85e-09	--	--	--	--	--	--	--	--	--	--	--	--	--	--	--	--	--	--	-	-	-
Unigene82828_All	604	39	2	2.6773	0.1293	4.372	up	1.28e-10	3.85e-09	gi|575427|gb|AAA53173.1|	150	8e-36	similar to S. cerevisiae PTR2 gene, GenBank Accession Number L11994 [Arabidopsis thaliana]	sp|P32901|PTR2_YEAST	174	5e-43	Peptide transporter PTR2 OS=Saccharomyces cerevisiae (strain ATCC 204508 / S288c) GN=PTR2 PE=1 SV=2	YKR093w	174	1e-43	COG3104	Dipeptide/tripeptide permease	K03305	4e-15	78.6	ppp:PHYPADRAFT_183911	proton-dependent oligopeptide transporter, POT family	-	-	-
Unigene33066_All	843	19	1	0.9345	0.0463	4.3351	up	1.17e-05	0.00016	gi|332322099|emb|CCA65995.1|	84.3	2e-15	hypothetical protein [Beta vulgaris subsp. vulgaris]	--	--	--	--	--	--	--	--	--	--	--	--	--	--	-	-	-
Unigene34961_All	491	19	1	1.6045	0.0795	4.335	up	1.17e-05	0.00016	gi|307136196|gb|ADN34034.1|	46.6	2e-11	gypsy/ty3 element polyprotein [Cucumis melo subsp. melo]	--	--	--	--	--	--	--	--	--	--	--	--	--	--	-	-	-
Unigene38861_All	338	19	1	2.3308	0.1155	4.3349	up	1.17e-05	0.00016	--	--	--	--	--	--	--	--	--	--	--	--	--	--	--	--	--	--	-	-	-
Unigene63416_All	352	19	1	2.2381	0.1109	4.3349	up	1.17e-05	0.00016	gi|339431376|gb|AEJ72569.1|	55.8	2e-07	putative reverse transcriptase family member [Malus x domestica]	--	--	--	--	--	--	--	--	--	--	--	--	--	--	-	-	-
Unigene86631_All	273	19	1	2.8858	0.143	4.3349	up	1.17e-05	0.00016	--	--	--	--	--	--	--	--	--	--	--	--	--	--	--	--	--	--	-	-	-
Unigene84981_All	241	19	1	3.2689	0.162	4.3347	up	1.17e-05	0.00016	--	--	--	--	--	--	--	--	--	--	--	--	--	--	--	--	--	--	-	-	-
Unigene87478_All	406	19	1	1.9404	0.0962	4.3342	up	1.17e-05	0.00016	gi|297831152|ref|XP_002883458.1|	120	4e-27	leucine-rich repeat family protein [Arabidopsis lyrata subsp. lyrata] >gi|297329298|gb|EFH59717.1| leucine-rich repeat family protein [Arabidopsis lyrata subsp. lyrata]	sp|P43298|TMK1_ARATH	101	2e-21	Probable receptor protein kinase TMK1 OS=Arabidopsis thaliana GN=TMK1 PE=1 SV=1	--	--	--	--	--	K00924	3e-22	101	ath:AT1G66150	[EC:2.7.1.-]	-	-	-
Unigene64904_All	268	74	4	11.4489	0.5827	4.2963	up	5.95e-19	3.51e-17	--	--	--	--	--	--	--	--	Ta0191	49.7	1e-06	COG1028	Dehydrogenases with different specificities (related to short-chain alcohol dehydrogenases)	--	--	--	--	--	-	-	-
Unigene81774_All	321	37	2	4.7793	0.2433	4.296	up	4.95e-10	1.39e-08	--	--	--	--	--	--	--	--	--	--	--	--	--	--	--	--	--	--	-	-	-
Unigene87970_All	362	18	1	2.0617	0.1078	4.2574	up	2.3e-05	0.000293	gi|307109023|gb|EFN57262.1|	58.2	3e-08	expressed protein [Chlorella variabilis]	sp|A1CD22|EGLC_ASPCL	137	2e-32	Probable glucan endo-1,3-beta-glucosidase eglC OS=Aspergillus clavatus (strain ATCC 1007 / CBS 513.65 / DSM 816 / NCTC 3887 / NRRL 1) GN=eglC PE=3 SV=1	Rv0312	49.7	1e-06	COG0443	Molecular chaperone	--	--	--	--	--	-	-	-
Unigene25843_All	263	18	1	2.8378	0.1484	4.2572	up	2.3e-05	0.000293	--	--	--	--	--	--	--	--	--	--	--	--	--	--	--	--	--	--	-	-	-
Unigene87279_All	370	18	1	2.0172	0.1055	4.257	up	2.3e-05	0.000293	--	--	--	--	--	--	--	--	--	--	--	--	--	--	--	--	--	--	-	-	-
Unigene53225_All	369	36	2	4.0452	0.2116	4.2568	up	9.71e-10	2.63e-08	--	--	--	--	--	--	--	--	--	--	--	--	--	--	--	--	--	--	-	-	-
Unigene87515_All	353	18	1	2.1143	0.1106	4.2568	up	2.3e-05	0.000293	--	--	--	--	--	--	--	--	--	--	--	--	--	--	--	--	--	--	-	-	-
Unigene85059_All	344	18	1	2.1696	0.1135	4.2567	up	2.3e-05	0.000293	--	--	--	--	--	--	--	--	--	--	--	--	--	--	--	--	--	--	-	-	-
Unigene62493_All	374	18	1	1.9956	0.1044	4.2566	up	2.3e-05	0.000293	--	--	--	--	--	--	--	--	--	--	--	--	--	--	--	--	--	--	-	-	-
Unigene84081_All	284	18	1	2.628	0.1375	4.2565	up	2.3e-05	0.000293	--	--	--	--	--	--	--	--	--	--	--	--	--	--	--	--	--	--	-	-	-
Unigene86624_All	302	18	1	2.4713	0.1293	4.2565	up	2.3e-05	0.000293	--	--	--	--	--	--	--	--	--	--	--	--	--	--	--	--	--	--	-	-	-
Unigene13269_All	527	36	2	2.8324	0.1482	4.2564	up	9.71e-10	2.63e-08	--	--	--	--	--	--	--	--	--	--	--	--	--	--	--	--	--	--	-	-	-
Unigene22997_All	478	18	1	1.5614	0.0817	4.2564	up	2.3e-05	0.000293	--	--	--	--	--	--	--	--	--	--	--	--	--	--	--	--	--	--	-	-	-
Unigene87036_All	323	18	1	2.3107	0.1209	4.2564	up	2.3e-05	0.000293	gi|115481094|ref|NP_001064140.1|	129	1e-29	Os10g0140200 [Oryza sativa Japonica Group] >gi|113638749|dbj|BAF26054.1| Os10g0140200 [Oryza sativa Japonica Group]	--	--	--	--	--	--	--	--	--	K01191	6e-31	129	osa:4348080	alpha-mannosidase [EC:3.2.1.24]	-	-	-
Unigene87579_All	260	18	1	2.8706	0.1502	4.2564	up	2.3e-05	0.000293	--	--	--	--	--	--	--	--	--	--	--	--	--	--	--	--	--	--	-	-	-
Unigene62123_All	349	18	1	2.1385	0.1119	4.2563	up	2.3e-05	0.000293	--	--	--	--	--	--	--	--	--	--	--	--	--	--	--	--	--	--	-	-	-
Unigene8760_All	364	18	1	2.0504	0.1073	4.2562	up	2.3e-05	0.000293	--	--	--	--	--	--	--	--	--	--	--	--	--	--	--	--	--	--	-	-	-
Unigene82814_All	412	35	2	3.5224	0.1895	4.2163	up	1.9e-09	4.97e-08	--	--	--	--	--	--	--	--	--	--	--	--	--	--	--	--	--	--	-	-	-
Unigene88598_All	477	35	2	3.0424	0.1637	4.2161	up	1.9e-09	4.97e-08	--	--	--	--	--	--	--	--	--	--	--	--	--	--	--	--	--	--	-	-	-
Unigene79012_All	252	35	2	5.7588	0.3099	4.2159	up	1.9e-09	4.97e-08	gi|226495039|ref|NP_001141249.1|	81.6	3e-15	hypothetical protein LOC100273336 [Zea mays] >gi|194703524|gb|ACF85846.1| unknown [Zea mays]	sp|Q01302|CCG6_NEUCR	74.3	2e-13	Clock-controlled protein 6 OS=Neurospora crassa GN=ccg-6 PE=2 SV=2	--	--	--	--	--	--	--	--	--	--	-	-	-
Unigene44912_All	667	17	1	1.0568	0.0585	4.1751	up	4.52e-05	0.000532	gi|297833440|ref|XP_002884602.1|	99.4	4e-20	ALDH22a1 [Arabidopsis lyrata subsp. lyrata] >gi|297330442|gb|EFH60861.1| ALDH22a1 [Arabidopsis lyrata subsp. lyrata]	sp|Q0WSF1|AL221_ARATH	99.4	2e-20	Aldehyde dehydrogenase 22A1 OS=Arabidopsis thaliana GN=ALDH22A1 PE=2 SV=2	--	--	--	--	--	--	--	--	--	--	GO:0008152//metabolic process	GO:0004030//aldehyde dehydrogenase [NAD(P)+] activity	GO:0031410//cytoplasmic vesicle;GO:0043231//intracellular membrane-bounded organelle
Unigene10944_All	441	17	1	1.5984	0.0885	4.1748	up	4.52e-05	0.000532	gi|8843739|dbj|BAA97287.1|	147	5e-35	retroelement pol polyprotein-like [Arabidopsis thaliana]	sp|P92519|M810_ARATH	114	2e-25	Uncharacterized mitochondrial protein AtMg00810 OS=Arabidopsis thaliana GN=AtMg00810 PE=4 SV=1	--	--	--	--	--	--	--	--	--	--	GO:0008152//metabolic process	GO:0046872//metal ion binding	-
Unigene107965_All	216	17	1	3.2633	0.1807	4.1747	up	4.52e-05	0.000532	--	--	--	--	sp|P40108|ALDH_DAVTA	82	1e-15	Aldehyde dehydrogenase OS=Davidiella tassiana GN=CLAH10 PE=1 SV=2	YER073w	57.8	5e-09	COG1012	NAD-dependent aldehyde dehydrogenases	--	--	--	--	--	-	-	-
Unigene81176_All	407	17	1	1.7319	0.0959	4.1747	up	4.52e-05	0.000531	gi|115464975|ref|NP_001056087.1|	62.4	2e-09	Os05g0524100 [Oryza sativa Japonica Group] >gi|113579638|dbj|BAF18001.1| Os05g0524100 [Oryza sativa Japonica Group]	--	--	--	--	--	--	--	--	--	--	--	--	--	--	-	-	-
Unigene84088_All	343	17	1	2.0551	0.1138	4.1746	up	4.52e-05	0.000531	gi|148611499|gb|ABQ95989.1|	85.1	2e-16	phospholipase A1 [Capsicum annuum]	sp|B9EYD3|PLA4_ORYSJ	70.5	3e-12	Phospholipase A1-II 4 OS=Oryza sativa subsp. japonica GN=Os01g0652300 PE=2 SV=2	--	--	--	--	--	--	--	--	--	--	GO:0044238//primary metabolic process	GO:0004091//carboxylesterase activity	-
Unigene36269_All	390	34	2	3.6148	0.2002	4.1744	up	3.72e-09	9.37e-08	gi|222142551|gb|ACM45962.1|	85.9	1e-16	auxin efflux carrier protein 4 [Glycine max]	sp|Q9LU77|PIN2_ARATH	65.1	1e-10	Auxin efflux carrier component 2 OS=Arabidopsis thaliana GN=PIN2 PE=1 SV=2	--	--	--	--	--	K13947	1e-19	92	vvi:100256460	auxin efflux carrier family	GO:0009725//response to hormone stimulus;GO:0006810//transport	GO:0022857//transmembrane transporter activity	GO:0005886//plasma membrane;GO:0044425//membrane part
Unigene87042_All	241	17	1	2.9248	0.162	4.1743	up	4.52e-05	0.000531	--	--	--	--	--	--	--	--	--	--	--	--	--	--	--	--	--	--	-	-	-
Unigene81029_All	408	17	1	1.7277	0.0957	4.1742	up	4.52e-05	0.000531	--	--	--	--	--	--	--	--	--	--	--	--	--	--	--	--	--	--	-	-	-
Unigene89286_All	229	17	1	3.0781	0.1705	4.1742	up	4.52e-05	0.000531	--	--	--	--	--	--	--	--	--	--	--	--	--	--	--	--	--	--	-	-	-
Unigene9552_All	589	17	1	1.1967	0.0663	4.1739	up	4.52e-05	0.000531	gi|79407941|ref|NP_188636.2|	146	2e-34	aspartyl protease family protein [Arabidopsis thaliana] >gi|11994777|dbj|BAB03167.1| nucleoid chloroplast DNA-binding protein-like [Arabidopsis thaliana] >gi|332642798|gb|AEE76319.1| aspartyl protease family protein [Arabidopsis thaliana]	sp|Q766C3|NEP1_NEPGR	90.9	5e-18	Aspartic proteinase nepenthesin-1 OS=Nepenthes gracilis GN=nep1 PE=1 SV=1	--	--	--	--	--	K00924	2e-08	56.6	ath:AT5G22850	[EC:2.7.1.-]	-	-	GO:0044464//cell part
Unigene75843_All	433	17	1	1.6279	0.0902	4.1737	up	4.52e-05	0.000532	--	--	--	--	--	--	--	--	--	--	--	--	--	--	--	--	--	--	-	-	-
Unigene81705_All	686	66	4	3.9892	0.2276	4.1315	up	1.27e-16	6.44e-15	--	--	--	--	sp|Q7M4F1|CUD4_SCHGR	102	2e-21	Endocuticle structural glycoprotein SgAbd-4 OS=Schistocerca gregaria PE=1 SV=1	--	--	--	--	--	--	--	--	--	--	-	-	-
Unigene56894_All	1223	32	2	1.0849	0.0638	4.0879	up	1.42e-08	3.32e-07	gi|115441265|ref|NP_001044912.1|	53.9	5e-06	Os01g0867200 [Oryza sativa Japonica Group] >gi|113534443|dbj|BAF06826.1| Os01g0867200 [Oryza sativa Japonica Group]	--	--	--	--	--	--	--	--	--	--	--	--	--	--	-	-	-
Unigene81661_All	293	16	1	2.2642	0.1332	4.0873	up	8.86e-05	0.00096	--	--	--	--	--	--	--	--	--	--	--	--	--	--	--	--	--	--	-	-	-
Unigene82768_All	280	16	1	2.3694	0.1394	4.0872	up	8.86e-05	0.00096	--	--	--	--	--	--	--	--	--	--	--	--	--	--	--	--	--	--	-	-	-
Unigene83971_All	265	16	1	2.5035	0.1473	4.0871	up	8.86e-05	0.00096	--	--	--	--	--	--	--	--	--	--	--	--	--	--	--	--	--	--	-	-	-
Unigene86583_All	237	16	1	2.7992	0.1647	4.0871	up	8.86e-05	0.000959	--	--	--	--	--	--	--	--	--	--	--	--	--	--	--	--	--	--	-	-	-
Unigene87024_All	267	16	1	2.4847	0.1462	4.0871	up	8.86e-05	0.000959	gi|148524780|dbj|BAF63397.1|	93.2	9e-19	multidrug resistance-associated protein [Fagopyrum esculentum]	sp|Q9LK64|AB3C_ARATH	63.2	5e-10	ABC transporter C family member 3 OS=Arabidopsis thaliana GN=ABCC3 PE=1 SV=1	--	--	--	--	--	--	--	--	--	--	-	-	-
Unigene85986_All	253	16	1	2.6222	0.1543	4.087	up	8.86e-05	0.00096	gi|124359343|gb|ABD28505.2|	50.4	7e-06	RNA-directed DNA polymerase (Reverse transcriptase); Polynucleotidyl transferase, Ribonuclease H fold [Medicago truncatula]	sp|P0C2F6|RNHX1_ARATH	48.9	1e-05	Putative ribonuclease H protein At1g65750 OS=Arabidopsis thaliana GN=At1g65750 PE=3 SV=1	--	--	--	--	--	--	--	--	--	--	-	-	-
Unigene86576_All	455	16	1	1.4581	0.0858	4.087	up	8.86e-05	0.000959	gi|297835902|ref|XP_002885833.1|	155	2e-37	FAD-dependent oxidoreductase family protein [Arabidopsis lyrata subsp. lyrata] >gi|297331673|gb|EFH62092.1| FAD-dependent oxidoreductase family protein [Arabidopsis lyrata subsp. lyrata]	--	--	--	--	--	--	--	--	--	--	--	--	--	--	-	-	-
Unigene86622_All	257	16	1	2.5814	0.1519	4.087	up	8.86e-05	0.000959	--	--	--	--	--	--	--	--	--	--	--	--	--	--	--	--	--	--	-	-	-
Unigene11245_All	400	16	1	1.6585	0.0976	4.0869	up	8.86e-05	0.000961	--	--	--	--	--	--	--	--	--	--	--	--	--	--	--	--	--	--	-	-	-
Unigene25865_All	369	16	1	1.7979	0.1058	4.0869	up	8.86e-05	0.000961	--	--	--	--	--	--	--	--	--	--	--	--	--	--	--	--	--	--	-	-	-
Unigene35966_All	400	16	1	1.6585	0.0976	4.0869	up	8.86e-05	0.000961	gi|24461849|gb|AAN62336.1|AF506028_3	85.9	1e-16	CTV.2 [Citrus trifoliata]	sp|Q0WV90|TPR1_ARATH	81.3	2e-15	Topless-related protein 1 OS=Arabidopsis thaliana GN=TPR1 PE=1 SV=3	--	--	--	--	--	--	--	--	--	--	GO:0003002;GO:0009725//response to hormone stimulus;GO:0003006//reproductive developmental process	GO:0042802//identical protein binding	GO:0043231//intracellular membrane-bounded organelle;GO:0044444//cytoplasmic part
Unigene61489_All	640	16	1	1.0366	0.061	4.0869	up	8.86e-05	0.000961	--	--	--	--	--	--	--	--	--	--	--	--	--	--	--	--	--	--	-	-	-
Unigene81393_All	429	16	1	1.5464	0.091	4.0869	up	8.86e-05	0.00096	gi|84028521|gb|ABC49719.1|	76.6	9e-14	actin depolymerizing factor-like protein [Arachis hypogaea]	sp|Q4I963|COFI_GIBZE	162	5e-40	Cofilin OS=Gibberella zeae (strain PH-1 / FGSC 9075 / NRRL 31084) GN=COF1 PE=3 SV=1	--	--	--	--	--	K05765	1e-13	72.8	sbi:SORBI_01g039300	cofilin	GO:0006950//response to stress;GO:0010038//response to metal ion	GO:0005515//protein binding	GO:0016020//membrane;GO:0009536//plastid
Unigene51326_All	270	16	1	2.4571	0.1446	4.0868	up	8.86e-05	0.000961	--	--	--	--	--	--	--	--	--	--	--	--	--	--	--	--	--	--	-	-	-
Unigene70941_All	336	16	1	1.9745	0.1162	4.0868	up	8.86e-05	0.000961	--	--	--	--	--	--	--	--	--	--	--	--	--	--	--	--	--	--	-	-	-
Unigene81245_All	399	32	2	3.3254	0.1957	4.0868	up	1.42e-08	3.32e-07	--	--	--	--	--	--	--	--	--	--	--	--	--	--	--	--	--	--	-	-	-
Unigene23069_All	415	16	1	1.5986	0.0941	4.0865	up	8.86e-05	0.000961	--	--	--	--	--	--	--	--	--	--	--	--	--	--	--	--	--	--	-	-	-
Unigene38845_All	355	16	1	1.8688	0.11	4.0865	up	8.86e-05	0.000961	gi|3914998|sp|O04996.3|SODC_SOLCS	108	2e-23	RecName: Full=Superoxide dismutase [Cu-Zn] >gi|1944324|dbj|BAA19674.1| copper/zinc-superoxide dismutase [Solidago canadensis var. scabra]	sp|P85978|SODC_ASPNG	176	5e-44	Superoxide dismutase [Cu-Zn] OS=Aspergillus niger GN=sodC PE=1 SV=2	YJR104c	142	1e-34	COG2032	Cu/Zn superoxide dismutase	K04565	5e-23	103	ath:AT2G28190	Cu/Zn superoxide dismutase [EC:1.15.1.1]	GO:0009314//response to radiation;GO:0006950//response to stress;GO:0006801//superoxide metabolic process;GO:0010038//response to metal ion	-	GO:0009532//plastid stroma;GO:0005576//extracellular region
Unigene85681_All	250	16	1	2.6537	0.1562	4.0865	up	8.86e-05	0.00096	--	--	--	--	--	--	--	--	--	--	--	--	--	--	--	--	--	--	-	-	-
Unigene86096_All	275	16	1	2.4124	0.142	4.0865	up	8.86e-05	0.00096	gi|10086468|gb|AAG12528.1|AC015446_9	57.8	4e-08	Hypothetical Protein [Arabidopsis thaliana]	sp|P04146|COPIA_DROME	51.6	2e-06	Copia protein OS=Drosophila melanogaster GN=GIP PE=1 SV=3	--	--	--	--	--	--	--	--	--	--	-	GO:0005488//binding	-
Unigene78846_All	671	16	1	0.9887	0.0582	4.0864	up	8.86e-05	0.00096	gi|222616191|gb|EEE52323.1|	218	7e-56	hypothetical protein OsJ_34342 [Oryza sativa Japonica Group]	sp|O05691|THCF_RHOER	232	2e-60	Non-heme haloperoxidase OS=Rhodococcus erythropolis GN=thcF PE=3 SV=1	SMa1809	229	4e-60	COG0596	Predicted hydrolases or acyltransferases (alpha/beta hydrolase superfamily)	--	--	--	--	--	-	-	GO:0043231//intracellular membrane-bounded organelle
Unigene80640_All	460	16	1	1.4422	0.0849	4.0864	up	8.86e-05	0.00096	--	--	--	--	--	--	--	--	--	--	--	--	--	--	--	--	--	--	-	-	-
Unigene88743_All	366	16	1	1.8126	0.1067	4.0864	up	8.86e-05	0.000959	--	--	--	--	--	--	--	--	--	--	--	--	--	--	--	--	--	--	-	-	-
Unigene25868_All	389	16	1	1.7054	0.1004	4.0863	up	8.86e-05	0.000961	gi|301123509|ref|XP_002909481.1|	69.7	1e-11	60S ribosomal protein L21-1 [Phytophthora infestans T30-4] >gi|262100243|gb|EEY58295.1| 60S ribosomal protein L21-1 [Phytophthora infestans T30-4]	sp|Q12672|RL21B_YEAST	96.3	5e-20	60S ribosomal protein L21-B OS=Saccharomyces cerevisiae (strain ATCC 204508 / S288c) GN=RPL21B PE=1 SV=1	YPL079w	96.3	1e-20	COG2139	Ribosomal protein L21E	K02889	3e-16	80.9	ppp:PHYPADRAFT_213645	large subunit ribosomal protein L21e	-	-	-
Unigene85514_All	364	16	1	1.8226	0.1073	4.0863	up	8.86e-05	0.00096	--	--	--	--	--	--	--	--	--	--	--	--	--	--	--	--	--	--	-	-	-
Unigene81343_All	358	16	1	1.8531	0.1091	4.0862	up	8.86e-05	0.00096	gi|15219860|ref|NP_176303.1|	67.4	5e-11	hydroxyproline-rich glycoprotein-like protein [Arabidopsis thaliana] >gi|332195654|gb|AEE33775.1| hydroxyproline-rich glycoprotein-like protein [Arabidopsis thaliana]	--	--	--	--	--	--	--	--	--	--	--	--	--	--	-	-	-
Unigene89356_All	769	63	4	3.3969	0.2031	4.064	up	9.33e-16	4.46e-14	--	--	--	--	--	--	--	--	--	--	--	--	--	--	--	--	--	--	-	-	-
Unigene34289_All	607	481	31	32.8567	1.9939	4.0425	up	3.99e-111	1.77e-108	--	--	--	--	sp|P22151|GRG1_NEUCR	100	9e-21	Glucose-repressible gene protein OS=Neurospora crassa GN=grg-1 PE=2 SV=1	--	--	--	--	--	--	--	--	--	--	-	-	-
Unigene50526_All	699	31	2	1.8389	0.1117	4.0411	up	2.76e-08	6.17e-07	--	--	--	--	--	--	--	--	--	--	--	--	--	--	--	--	--	--	-	-	-
Unigene53037_All	500	31	2	2.5707	0.1562	4.0407	up	2.76e-08	6.17e-07	gi|302853746|ref|XP_002958386.1|	73.9	8e-13	p300/CBP acetyl-transferase [Volvox carteri f. nagariensis] >gi|300256266|gb|EFJ40536.1| p300/CBP acetyl-transferase [Volvox carteri f. nagariensis]	sp|Q9UVI4|THYD_CLAFS	157	3e-38	Trihydrophobin OS=Claviceps fusiformis GN=TH1 PE=1 SV=1	YPO2725	56.6	2e-08	COG3501	Uncharacterized protein conserved in bacteria	--	--	--	--	--	-	GO:0005488//binding	-
Unigene26244_All	647	75	5	4.8065	0.3017	3.9938	up	2.57e-18	1.46e-16	gi|308803456|ref|XP_003079041.1|	166	2e-40	Putative 40S ribosomal protein S17 (ISS) [Ostreococcus tauri] >gi|116057495|emb|CAL51922.1| Putative 40S ribosomal protein S17 (ISS) [Ostreococcus tauri]	sp|P27770|RS17_NEUCR	245	2e-64	40S ribosomal protein S17 OS=Neurospora crassa GN=rps-17 PE=3 SV=1	SPCC24B10.09	194	8e-50	COG1383	Ribosomal protein S17E	K02962	1e-40	163	cre:CHLREDRAFT_195601	small subunit ribosomal protein S17e	GO:0010467//gene expression	GO:0005198//structural molecule activity	GO:0030529//ribonucleoprotein complex
Unigene85715_All	296	30	2	4.2024	0.2638	3.9937	up	5.37e-08	1.15e-06	--	--	--	--	--	--	--	--	--	--	--	--	--	--	--	--	--	--	-	-	-
Unigene88814_All	528	30	2	2.3559	0.1479	3.9936	up	5.37e-08	1.15e-06	gi|145332643|ref|NP_001078187.1|	117	6e-26	uncharacterized protein [Arabidopsis thaliana] >gi|122178675|sp|Q1G3M2.1|U631_ARATH RecName: Full=UPF0631 protein At3g19508 >gi|332642728|gb|AEE76249.1| uncharacterized protein [Arabidopsis thaliana]	sp|Q1G3M2|U631_ARATH	117	3e-26	UPF0631 protein At3g19508 OS=Arabidopsis thaliana GN=At3g19508 PE=3 SV=1	--	--	--	--	--	--	--	--	--	--	GO:0010468//regulation of gene expression	-	GO:0043231//intracellular membrane-bounded organelle
Unigene67502_All	1116	30	2	1.1146	0.07	3.993	up	5.37e-08	1.15e-06	gi|239909311|gb|ACS32301.1|	397	1e-120	cinnamoyl-CoA reductase [Jatropha curcas]	sp|P51102|DFRA_ARATH	168	7e-48	Dihydroflavonol-4-reductase OS=Arabidopsis thaliana GN=DFRA PE=2 SV=2	SA0317	103	5e-22	COG0451	Nucleoside-diphosphate-sugar epimerases	K13082	9e-49	168	ath:AT5G42800	bifunctional dihydroflavonol 4-reductase/flavanone 4-reductase [EC:1.1.1.219 1.1.1.234]	GO:0008152//metabolic process	GO:0005488//binding;GO:0003824//catalytic activity	-
Unigene32998_All	416	2414	165	240.609	15.4853	3.9577	up	0	0	--	--	--	--	--	--	--	--	--	--	--	--	--	--	--	--	--	--	-	-	-
Unigene44869_All	1632	29	2	0.7368	0.0478	3.9462	up	1.04e-07	2.13e-06	gi|8843739|dbj|BAA97287.1|	140	7e-32	retroelement pol polyprotein-like [Arabidopsis thaliana]	sp|P10978|POLX_TOBAC	65.9	9e-10	Retrovirus-related Pol polyprotein from transposon TNT 1-94 OS=Nicotiana tabacum PE=2 SV=1	--	--	--	--	--	--	--	--	--	--	GO:0006026	GO:0004553//hydrolase activity, hydrolyzing O-glycosyl compounds;GO:0003676//nucleic acid binding;GO:0030247//polysaccharide binding	-
Unigene38520_All	357	29	2	3.3682	0.2187	3.945	up	1.04e-07	2.13e-06	--	--	--	--	--	--	--	--	--	--	--	--	--	--	--	--	--	--	-	-	-
Unigene22298_All	691	29	2	1.7402	0.113	3.9449	up	1.04e-07	2.13e-06	gi|18414342|ref|NP_567449.1|	157	2e-37	5'-nucleotidase [Arabidopsis thaliana] >gi|27311791|gb|AAO00861.1| expressed protein [Arabidopsis thaliana] >gi|30984528|gb|AAP42727.1| At4g14930 [Arabidopsis thaliana] >gi|332658124|gb|AEE83524.1| 5'-nucleotidase [Arabidopsis thaliana]	sp|Q39VS1|SURE_GEOMG	81.3	6e-15	5'-nucleotidase surE OS=Geobacter metallireducens (strain GS-15 / ATCC 53774 / DSM 7210) GN=surE PE=3 SV=1	DR2397	72	9e-13	COG0496	Predicted acid phosphatase	K03787	1e-38	157	ath:AT4G14930	5'-nucleotidase [EC:3.1.3.5]	-	GO:0008252//nucleotidase activity;GO:0043169//cation binding	GO:0044424//intracellular part
Unigene7933_All	821	29	2	1.4646	0.0951	3.9449	up	1.04e-07	2.13e-06	gi|255543122|ref|XP_002512624.1|	53.5	3e-06	conserved hypothetical protein [Ricinus communis] >gi|223548585|gb|EEF50076.1| conserved hypothetical protein [Ricinus communis]	--	--	--	--	--	--	--	--	--	--	--	--	--	--	-	-	-
Unigene87807_All	226	29	2	5.3206	0.3455	3.9448	up	1.04e-07	2.13e-06	--	--	--	--	--	--	--	--	--	--	--	--	--	--	--	--	--	--	-	-	-
Unigene51092_All	556	58	4	4.3253	0.2809	3.9447	up	2.56e-14	1.1e-12	gi|115459228|ref|NP_001053214.1|	63.2	2e-09	Os04g0498700 [Oryza sativa Japonica Group] >gi|38345395|emb|CAD41241.2| OSJNBa0067K08.24 [Oryza sativa Japonica Group] >gi|113564785|dbj|BAF15128.1| Os04g0498700 [Oryza sativa Japonica Group]	sp|Q02817|MUC2_HUMAN	73.6	8e-13	Mucin-2 OS=Homo sapiens GN=MUC2 PE=1 SV=2	SPBC28F2.12	58.9	5e-09	COG0086	DNA-directed RNA polymerase, beta' subunit/160 kD subunit	K03006	2e-08	56.2	sbi:SORBI_07g003680	DNA-directed RNA polymerase II subunit A [EC:2.7.7.6]	-	-	-
Unigene87806_All	269	29	2	4.4701	0.2903	3.9447	up	1.04e-07	2.13e-06	gi|226492324|ref|NP_001142207.1|	52.4	2e-06	hypothetical protein LOC100274375 [Zea mays] >gi|194707598|gb|ACF87883.1| unknown [Zea mays]	--	--	--	--	--	--	--	--	--	--	--	--	--	--	-	-	-
Unigene64816_All	373	28	2	3.1126	0.2093	3.8945	up	2.02e-07	3.93e-06	--	--	--	--	--	--	--	--	--	--	--	--	--	--	--	--	--	--	-	-	-
Unigene81290_All	686	42	3	2.5386	0.1707	3.8945	up	1.35e-10	4.05e-09	--	--	--	--	--	--	--	--	--	--	--	--	--	--	--	--	--	--	-	-	-
Unigene86662_All	470	28	2	2.4702	0.1661	3.8945	up	2.02e-07	3.93e-06	--	--	--	--	--	--	--	--	--	--	--	--	--	--	--	--	--	--	-	-	-
Unigene25931_All	505	28	2	2.299	0.1546	3.8944	up	2.02e-07	3.94e-06	gi|224009464|ref|XP_002293690.1|	260	5e-69	eukaryotic translation initiation factor 4A [Thalassiosira pseudonana CCMP1335] >gi|220970362|gb|EED88699.1| eukaryotic translation initiation factor 4A [Thalassiosira pseudonana CCMP1335]	sp|A4QVP2|IF4A_MAGO7	323	3e-88	ATP-dependent RNA helicase eIF4A OS=Magnaporthe oryzae (strain 70-15 / FGSC 8958) GN=TIF1 PE=3 SV=1	SPAC1006.07	291	3e-79	COG0513	Superfamily II DNA and RNA helicases	K13025	4e-65	244	zma:732749	translation initiation factor eIF-4A 3 [EC:3.6.1.-]	-	-	-
Unigene11335_All	368	28	2	3.1548	0.2122	3.8941	up	2.02e-07	3.94e-06	--	--	--	--	--	--	--	--	--	--	--	--	--	--	--	--	--	--	-	-	-
Unigene86136_All	475	28	2	2.4442	0.1644	3.8941	up	2.02e-07	3.93e-06	--	--	--	--	--	--	--	--	--	--	--	--	--	--	--	--	--	--	-	-	-
Unigene21497_All	346	28	2	3.3554	0.2257	3.894	up	2.02e-07	3.94e-06	--	--	--	--	--	--	--	--	--	--	--	--	--	--	--	--	--	--	-	-	-
Unigene11326_All	576	28	2	2.0156	0.1356	3.8938	up	2.02e-07	3.94e-06	--	--	--	--	--	--	--	--	--	--	--	--	--	--	--	--	--	--	-	-	-
Unigene73461_All	785	28	2	1.479	0.0995	3.8938	up	2.02e-07	3.93e-06	gi|297841541|ref|XP_002888652.1|	106	4e-22	universal stress protein family protein [Arabidopsis lyrata subsp. lyrata] >gi|297334493|gb|EFH64911.1| universal stress protein family protein [Arabidopsis lyrata subsp. lyrata]	--	--	--	--	--	--	--	--	--	--	--	--	--	--	-	-	-
Unigene73817_All	877	27	2	1.2765	0.089	3.8422	up	3.9e-07	7.19e-06	gi|116310386|emb|CAH67397.1|	331	7e-90	H0115B09.9 [Oryza sativa Indica Group]	sp|Q8I7P9|POL5_DROME	150	9e-36	Retrovirus-related Pol polyprotein from transposon opus OS=Drosophila melanogaster GN=pol PE=4 SV=1	SPAC13D1.01c	136	5e-32	COG2801	Transposase and inactivated derivatives	--	--	--	--	--	GO:0006260//DNA replication	GO:0003676//nucleic acid binding;GO:0016891//endoribonuclease activity, producing 5'-phosphomonoesters;GO:0034061	GO:0043231//intracellular membrane-bounded organelle
Unigene73726_All	525	27	2	2.1324	0.1487	3.842	up	3.9e-07	7.2e-06	--	--	--	--	--	--	--	--	--	--	--	--	--	--	--	--	--	--	-	-	-
Unigene82744_All	329	27	2	3.4028	0.2373	3.8419	up	3.9e-07	7.19e-06	--	--	--	--	--	--	--	--	--	--	--	--	--	--	--	--	--	--	-	-	-
Unigene82799_All	288	27	2	3.8872	0.2711	3.8418	up	3.9e-07	7.19e-06	gi|302765943|ref|XP_002966392.1|	55.8	2e-07	glucan synthase like 1 [Selaginella moellendorffii] >gi|300165812|gb|EFJ32419.1| glucan synthase like 1 [Selaginella moellendorffii]	sp|A2QLK4|FKS1_ASPNC	158	9e-39	1,3-beta-glucan synthase component FKS1 OS=Aspergillus niger (strain CBS 513.88 / FGSC A1513) GN=fksA PE=3 SV=1	--	--	--	--	--	K11000	1e-07	52.4	ppp:PHYPADRAFT_175718	callose synthase [EC:2.4.1.-]	GO:0051707//response to other organism;GO:0052482;GO:0048229//gametophyte development;GO:0002218//activation of innate immune response;GO:0009887//organ morphogenesis;GO:0010260//organ senescence	GO:0016757//transferase activity, transferring glycosyl groups	GO:0016020//membrane
Unigene10085_All	594	54	4	3.7694	0.2629	3.8417	up	3.55e-13	1.37e-11	--	--	--	--	--	--	--	--	--	--	--	--	--	--	--	--	--	--	-	-	-
Unigene51270_All	528	27	2	2.1203	0.1479	3.8416	up	3.9e-07	7.2e-06	gi|15227684|ref|NP_180560.1|	95.1	4e-19	NADH dehydrogenase [Arabidopsis thaliana] >gi|330253238|gb|AEC08332.1| NADH dehydrogenase [Arabidopsis thaliana]	sp|Q55CD9|NDH_DICDI	117	5e-26	Probable NADH dehydrogenase OS=Dictyostelium discoideum GN=DDB_G0270104 PE=3 SV=2	SPBC947.15c	74.3	1e-13	COG1252	NADH dehydrogenase, FAD-containing subunit	K03885	2e-21	99	pop:POPTR_203252	NADH dehydrogenase [EC:1.6.99.3]	-	-	-
Unigene7362_All	703	27	2	1.5925	0.1111	3.8414	up	3.9e-07	7.2e-06	--	--	--	--	--	--	--	--	--	--	--	--	--	--	--	--	--	--	-	-	-
Unigene58180_All	985	27	2	1.1366	0.0793	3.8413	up	3.9e-07	7.2e-06	--	--	--	--	--	--	--	--	--	--	--	--	--	--	--	--	--	--	-	-	-
Unigene61741_All	417	27	2	2.6847	0.1873	3.8413	up	3.9e-07	7.2e-06	--	--	--	--	--	--	--	--	--	--	--	--	--	--	--	--	--	--	-	-	-
Unigene82670_All	763	26	2	1.4129	0.1023	3.7878	up	7.52e-07	1.32e-05	gi|170286899|dbj|BAG13451.1|	112	5e-24	beta-glucosidase [Rosa hybrid cultivar]	sp|Q7XKV2|BGL13_ORYSJ	106	1e-22	Beta-glucosidase 13 OS=Oryza sativa subsp. japonica GN=BGLU13 PE=2 SV=2	BS_yckE	74.7	2e-13	COG2723	Beta-glucosidase/6-phospho-beta-glucosidase/beta-galactosidase	K01188	2e-23	106	osa:4336146	beta-glucosidase [EC:3.2.1.21]	GO:0044238//primary metabolic process	GO:0043167//ion binding;GO:0015926//glucosidase activity	GO:0031410//cytoplasmic vesicle
Unigene63040_All	381	26	2	2.8295	0.2049	3.7876	up	7.52e-07	1.32e-05	--	--	--	--	--	--	--	--	--	--	--	--	--	--	--	--	--	--	-	-	-
Unigene76151_All	505	26	2	2.1348	0.1546	3.7875	up	7.52e-07	1.32e-05	--	--	--	--	--	--	--	--	--	--	--	--	--	--	--	--	--	--	-	-	-
Unigene83108_All	219	26	2	4.9226	0.3565	3.7874	up	7.52e-07	1.32e-05	--	--	--	--	--	--	--	--	--	--	--	--	--	--	--	--	--	--	-	-	-
Unigene38008_All	458	26	2	2.3538	0.1705	3.7871	up	7.52e-07	1.32e-05	--	--	--	--	--	--	--	--	--	--	--	--	--	--	--	--	--	--	-	-	-
Unigene17027_All	531	25	2	1.9522	0.147	3.7312	up	1.45e-06	2.42e-05	gi|22331623|ref|NP_190206.2|	122	3e-27	nudix hydrolase 9 [Arabidopsis thaliana] >gi|68565917|sp|Q8VYR2.1|NUDT9_ARATH RecName: Full=Nudix hydrolase 9; Short=AtNUDT9 >gi|332644606|gb|AEE78127.1| nudix hydrolase 9 [Arabidopsis thaliana]	sp|Q8VYR2|NUDT9_ARATH	122	2e-27	Nudix hydrolase 9 OS=Arabidopsis thaliana GN=NUDT9 PE=2 SV=1	--	--	--	--	--	--	--	--	--	--	-	-	-
Unigene52581_All	318	25	2	3.2597	0.2455	3.7309	up	1.45e-06	2.42e-05	gi|302845734|ref|XP_002954405.1|	133	8e-31	phosphoenolpyruvate carboxykinase [Volvox carteri f. nagariensis] >gi|300260335|gb|EFJ44555.1| phosphoenolpyruvate carboxykinase [Volvox carteri f. nagariensis]	sp|Q7RVS9|PCKA_NEUCR	214	1e-55	Phosphoenolpyruvate carboxykinase [ATP] OS=Neurospora crassa GN=pck-1 PE=3 SV=1	YKR097w	159	9e-40	COG1866	Phosphoenolpyruvate carboxykinase (ATP)	K01610	3e-31	130	cre:CHLREDRAFT_196612	phosphoenolpyruvate carboxykinase (ATP) [EC:4.1.1.49]	GO:0008152//metabolic process	GO:0004611//phosphoenolpyruvate carboxykinase activity;GO:0017076//purine nucleotide binding	-
Unigene64095_All	400	25	2	2.5915	0.1952	3.7308	up	1.45e-06	2.41e-05	gi|159490505|ref|XP_001703215.1|	72.8	1e-12	elongation factor 2 [Chlamydomonas reinhardtii] >gi|158270674|gb|EDO96511.1| elongation factor 2 [Chlamydomonas reinhardtii]	sp|Q96X45|EF2_NEUCR	81.6	1e-15	Elongation factor 2 OS=Neurospora crassa GN=cot-3 PE=3 SV=3	YOR133w	70.5	8e-13	COG0480	Translation elongation factors (GTPases)	K03234	9e-14	72.8	cre:CHLREDRAFT_24524	elongation factor EF-2 [EC:3.6.5.3]	GO:0010467//gene expression	GO:0008135//translation factor activity, nucleic acid binding;GO:0032561//guanyl ribonucleotide binding;GO:0017111//nucleoside-triphosphatase activity	GO:0031410//cytoplasmic vesicle
Unigene87390_All	301	25	2	3.4438	0.2594	3.7308	up	1.45e-06	2.41e-05	--	--	--	--	--	--	--	--	--	--	--	--	--	--	--	--	--	--	-	-	-
Unigene87439_All	358	25	2	2.8955	0.2181	3.7308	up	1.45e-06	2.41e-05	--	--	--	--	--	--	--	--	--	--	--	--	--	--	--	--	--	--	-	-	-
Unigene64810_All	334	25	2	3.1036	0.2338	3.7306	up	1.45e-06	2.41e-05	--	--	--	--	--	--	--	--	--	--	--	--	--	--	--	--	--	--	-	-	-
Unigene38264_All	268	25	2	3.8679	0.2914	3.7305	up	1.45e-06	2.42e-05	--	--	--	--	--	--	--	--	--	--	--	--	--	--	--	--	--	--	-	-	-
Unigene88580_All	354	25	2	2.9282	0.2206	3.7305	up	1.45e-06	2.41e-05	gi|195629766|gb|ACG36524.1|	83.6	7e-16	aldose reductase [Zea mays]	sp|O34678|YTBE_BACSU	83.2	5e-16	Uncharacterized oxidoreductase YtbE OS=Bacillus subtilis GN=ytbE PE=1 SV=1	YDR368w	84	6e-17	COG0656	Aldo/keto reductases, related to diketogulonate reductase	K00002	9e-15	75.9	osa:4338987	alcohol dehydrogenase (NADP+) [EC:1.1.1.2]	-	-	-
Unigene24889_All	272	37	3	5.6403	0.4306	3.7114	up	3.57e-09	9.02e-08	--	--	--	--	--	--	--	--	--	--	--	--	--	--	--	--	--	--	-	-	-
Unigene40983_All	742	24	2	1.3411	0.1052	3.6722	up	2.78e-06	4.35e-05	gi|226492654|ref|NP_001148754.1|	137	2e-31	LOC100282370 [Zea mays] >gi|195621896|gb|ACG32778.1| nucleic acid binding protein [Zea mays]	sp|Q6DGZ0|CCD75_DANRE	59.7	2e-08	Coiled-coil domain-containing protein 75 OS=Danio rerio GN=ccdc75 PE=2 SV=1	--	--	--	--	--	K13094	5e-08	55.5	vvi:100250662	RNA-binding protein 5/10	-	GO:0005488//binding	GO:0005622//intracellular
Unigene49114_All	835	24	2	1.1918	0.0935	3.672	up	2.78e-06	4.35e-05	--	--	--	--	--	--	--	--	--	--	--	--	--	--	--	--	--	--	-	-	-
Unigene11761_All	256	24	2	3.8872	0.305	3.6719	up	2.78e-06	4.35e-05	gi|308810629|ref|XP_003082623.1|	55.8	2e-07	Cytochrome b5 (ISS) [Ostreococcus tauri] >gi|116061092|emb|CAL56480.1| Cytochrome b5 (ISS) [Ostreococcus tauri]	sp|Q9HFV1|CYB5_RHIST	53.5	4e-07	Cytochrome b5 OS=Rhizopus stolonifer PE=2 SV=1	--	--	--	--	--	--	--	--	--	--	GO:0006952//defense response;GO:0008152//metabolic process	GO:0016627//oxidoreductase activity, acting on the CH-CH group of donors;GO:0000166//nucleotide binding;GO:0005506//iron ion binding	GO:0043231//intracellular membrane-bounded organelle;GO:0016020//membrane
Unigene20271_All	876	72	6	3.408	0.2674	3.6719	up	1.28e-16	6.49e-15	gi|3219280|dbj|BAA28834.1|	316	2e-85	delta-9 fatty acid desaturase [Cyanidioschyzon merolae]	sp|Q12618|ACO1_AJECA	526	1e-148	Acyl-CoA desaturase OS=Ajellomyces capsulata GN=OLE1 PE=3 SV=1	SPCC1281.06c_1	327	2e-89	COG1398	Fatty-acid desaturase	K00507	3e-145	511	zma:100382970	stearoyl-CoA desaturase (delta-9 desaturase) [EC:1.14.19.1]	-	-	-
Unigene38912_All	508	24	2	1.9589	0.1537	3.6719	up	2.78e-06	4.35e-05	gi|304555573|ref|NP_001167872.2|	51.6	5e-06	ramosa 1 enhancer locus 2 [Zea mays] >gi|303387473|gb|ADM15670.1| ramosa 1 enhancer locus 2 [Zea mays] >gi|303387475|gb|ADM15671.1| ramosa 1 enhancer locus 2 [Zea mays]	--	--	--	--	--	--	--	--	--	--	--	--	--	--	-	-	-
Unigene32298_All	387	24	2	2.5714	0.2018	3.6716	up	2.78e-06	4.35e-05	gi|226504250|ref|NP_001150672.1|	212	1e-54	LOC100284305 [Zea mays] >gi|195640988|gb|ACG39962.1| ADP,ATP carrier protein [Zea mays]	sp|P02723|ADT_NEUCR	221	1e-57	ADP,ATP carrier protein OS=Neurospora crassa GN=acp PE=3 SV=1	--	--	--	--	--	K05863	7e-56	212	zma:100284305	solute carrier family 25 (mitochondrial carrier; adenine nucleotide translocator)	GO:0006464//protein modification process;GO:0006810//transport	GO:0016301//kinase activity;GO:0032559//adenyl ribonucleotide binding	GO:0019866//organelle inner membrane;GO:0043231//intracellular membrane-bounded organelle;GO:0031224//intrinsic to membrane
Unigene48525_All	357	47	4	5.4588	0.4374	3.6416	up	3.38e-11	1.09e-09	--	--	--	--	sp|P37351|RPIB_ECOLI	57	4e-08	Ribose-5-phosphate isomerase B OS=Escherichia coli (strain K12) GN=rpiB PE=1 SV=2	aq_1138	60.8	6e-10	COG0698	Ribose 5-phosphate isomerase RpiB	--	--	--	--	--	-	-	-
Unigene85067_All	249	47	4	7.8265	0.6272	3.6414	up	3.38e-11	1.08e-09	--	--	--	--	sp|P48503|QCR8_NEUCR	71.2	2e-12	Cytochrome b-c1 complex subunit 8 OS=Neurospora crassa GN=qcr-8 PE=1 SV=1	--	--	--	--	--	--	--	--	--	--	-	-	-
Unigene8279_All	1118	305	26	11.3116	0.9079	3.6391	up	1.51e-65	3.53e-63	gi|302843675|ref|XP_002953379.1|	95.1	2e-18	extracellular matrix glycoprotein pherophorin-V9 [Volvox carteri f. nagariensis] >gi|28569968|dbj|BAC57890.1| pherophorin [Volvox carteri f. nagariensis] >gi|300261476|gb|EFJ45689.1| extracellular matrix glycoprotein pherophorin-V9 [Volvox carteri f. nagariensis]	sp|Q02817|MUC2_HUMAN	95.5	6e-19	Mucin-2 OS=Homo sapiens GN=MUC2 PE=1 SV=2	YPO2725	70.1	7e-12	COG3501	Uncharacterized protein conserved in bacteria	--	--	--	--	--	GO:0009987//cellular process;GO:0043170;GO:0044238//primary metabolic process	GO:0003824//catalytic activity	-
Unigene71769_All	1729	348	30	8.3455	0.6774	3.6229	up	2.67e-74	7.19e-72	gi|145332667|ref|NP_001078199.1|	123	7e-27	bifunctional inhibitor/lipid transfer protein/seed storage protein-like protein [Arabidopsis thaliana] >gi|332643072|gb|AEE76593.1| bifunctional inhibitor/lipid transfer protein/seed storage protein-like protein [Arabidopsis thaliana]	sp|A1DJ47|EGLC_NEOFI	366	3e-100	Probable glucan endo-1,3-beta-glucosidase eglC OS=Neosartorya fischeri (strain ATCC 1020 / DSM 3700 / FGSC A1164 / NRRL 181) GN=eglC PE=3 SV=1	SPAC26H5.08c	75.5	3e-13	COG5309	Exo-beta-1,3-glucanase	--	--	--	--	--	-	-	-
Unigene27844_All	883	23	2	1.08	0.0884	3.6108	up	5.32e-06	7.86e-05	gi|115466012|ref|NP_001056605.1|	89.4	6e-17	Os06g0114600 [Oryza sativa Japonica Group] >gi|113594645|dbj|BAF18519.1| Os06g0114600 [Oryza sativa Japonica Group]	--	--	--	--	--	--	--	--	--	--	--	--	--	--	-	-	GO:0043231//intracellular membrane-bounded organelle
Unigene73570_All	835	23	2	1.1421	0.0935	3.6106	up	5.32e-06	7.86e-05	--	--	--	--	--	--	--	--	--	--	--	--	--	--	--	--	--	--	-	-	-
Unigene85984_All	345	23	2	2.7642	0.2263	3.6106	up	5.32e-06	7.85e-05	--	--	--	--	sp|Q02854|NUXM_NEUCR	111	1e-24	NADH-ubiquinone oxidoreductase 21 kDa subunit OS=Neurospora crassa GN=nuo-21 PE=1 SV=1	--	--	--	--	--	--	--	--	--	--	-	-	-
Unigene11547_All	473	69	6	6.0486	0.4952	3.6105	up	8.84e-16	4.24e-14	--	--	--	--	--	--	--	--	--	--	--	--	--	--	--	--	--	--	-	-	-
Unigene24912_All	511	23	2	1.8663	0.1528	3.6105	up	5.32e-06	7.86e-05	--	--	--	--	--	--	--	--	--	--	--	--	--	--	--	--	--	--	-	-	-
Unigene86069_All	401	23	2	2.3782	0.1947	3.6105	up	5.32e-06	7.85e-05	gi|186898205|gb|ACC93947.1|	170	4e-42	heat-shock protein 70 [Hevea brasiliensis]	sp|Q75E44|HSP75_ASHGO	193	3e-49	Heat shock protein SSB OS=Ashbya gossypii (strain ATCC 10895 / CBS 109.51 / FGSC 9923 / NRRL Y-1056) GN=SSB PE=3 SV=3	SPBC1709.05	192	2e-49	COG0443	Molecular chaperone	K03283	3e-43	170	osa:4327388	heat shock 70kDa protein 1/8	GO:0008152//metabolic process;GO:0050896//response to stimulus	GO:0016628//oxidoreductase activity, acting on the CH-CH group of donors, NAD or NADP as acceptor;GO:0032559//adenyl ribonucleotide binding	-
Unigene87463_All	295	23	2	3.2328	0.2647	3.6104	up	5.32e-06	7.85e-05	--	--	--	--	--	--	--	--	--	--	--	--	--	--	--	--	--	--	-	-	-
Unigene89317_All	270	23	2	3.5321	0.2892	3.6104	up	5.32e-06	7.85e-05	--	--	--	--	--	--	--	--	--	--	--	--	--	--	--	--	--	--	-	-	-
Unigene22286_All	312	23	2	3.0566	0.2503	3.6102	up	5.32e-06	7.86e-05	--	--	--	--	--	--	--	--	--	--	--	--	--	--	--	--	--	--	-	-	-
Unigene88685_All	371	23	2	2.5705	0.2105	3.6102	up	5.32e-06	7.85e-05	gi|159483465|ref|XP_001699781.1|	177	3e-44	eukaryotic initiation factor [Chlamydomonas reinhardtii] >gi|158281723|gb|EDP07477.1| eukaryotic initiation factor [Chlamydomonas reinhardtii]	sp|Q6GVM3|IF1AY_PANTR	187	1e-47	Eukaryotic translation initiation factor 1A, Y-chromosomal OS=Pan troglodytes GN=EIF1AY PE=2 SV=3	SPBC25H2.07	183	8e-47	COG0361	Translation initiation factor 1 (IF-1)	K03236	2e-45	177	cre:CHLREDRAFT_141865	translation initiation factor eIF-1A	GO:0006412//translation	GO:0008135//translation factor activity, nucleic acid binding	-
Unigene24267_All	488	34	3	2.8889	0.24	3.5894	up	2.49e-08	5.61e-07	gi|224001794|ref|XP_002290569.1|	114	4e-25	RL37A, ribosomal protein 37A 60S large ribosomal subunit [Thalassiosira pseudonana CCMP1335] >gi|220973991|gb|EED92321.1| RL37A, ribosomal protein 37A 60S large ribosomal subunit [Thalassiosira pseudonana CCMP1335]	sp|Q9C0T1|RL37_EMENI	135	2e-31	60S ribosomal protein L37 OS=Emericella nidulans GN=rpl37 PE=3 SV=1	YDR500c	123	1e-28	COG2126	Ribosomal protein L37E	K02922	4e-25	111	olu:OSTLU_32818	large subunit ribosomal protein L37e	GO:0010467//gene expression	GO:0043169//cation binding;GO:0003723//RNA binding;GO:0005198//structural molecule activity	GO:0030529//ribonucleoprotein complex
Unigene52977_All	518	34	3	2.7216	0.2261	3.5894	up	2.49e-08	5.61e-07	gi|3551249|dbj|BAA32823.1|	108	3e-23	184 [Daucus carota]	--	--	--	--	--	--	--	--	--	--	--	--	--	--	-	-	-
Unigene85428_All	233	34	3	6.0505	0.5027	3.5893	up	2.49e-08	5.61e-07	--	--	--	--	--	--	--	--	--	--	--	--	--	--	--	--	--	--	-	-	-
Unigene26251_All	1144	44	4	1.5948	0.1365	3.5464	up	2.33e-10	6.81e-09	gi|19920099|gb|AAM08531.1|AC079935_3	82.4	1e-14	Hypothetical protein [Oryza sativa Japonica Group] >gi|19920232|gb|AAM08664.1|AC113338_20 Hypothetical protein [Oryza sativa Japonica Group]	sp|P47001|CIS3_YEAST	125	6e-28	Cell wall mannoprotein CIS3 OS=Saccharomyces cerevisiae (strain ATCC 204508 / S288c) GN=CIS3 PE=1 SV=1	Rv0304c	51.2	3e-06	COG5651	PPE-repeat proteins	--	--	--	--	--	-	-	-
Unigene66380_All	440	44	4	4.1464	0.3549	3.5464	up	2.33e-10	6.81e-09	gi|300176760|emb|CBK25329.2|	82	2e-15	Malate Dehydrogenase (MDH) [Blastocystis hominis]	sp|P17505|MDHM_YEAST	91.7	1e-18	Malate dehydrogenase, mitochondrial OS=Saccharomyces cerevisiae (strain ATCC 204508 / S288c) GN=MDH1 PE=1 SV=2	YKL085w	91.7	4e-19	COG0039	Malate/lactate dehydrogenases	K00026	1e-14	75.9	ppp:PHYPADRAFT_207351	malate dehydrogenase [EC:1.1.1.37]	-	-	-
Unigene74721_All	367	33	3	3.7283	0.3191	3.5464	up	4.75e-08	1.02e-06	gi|197293846|gb|ACH58421.1|	82	2e-15	nodulin 93 [Prunus dulcis]	sp|Q02921|NO93_SOYBN	77.8	2e-14	Early nodulin-93 OS=Glycine max PE=2 SV=1	--	--	--	--	--	--	--	--	--	--	-	-	-
Unigene85011_All	271	22	2	3.3661	0.2881	3.5464	up	1.02e-05	0.00014	--	--	--	--	--	--	--	--	--	--	--	--	--	--	--	--	--	--	-	-	-
Unigene27860_All	512	22	2	1.7816	0.1525	3.5463	up	1.02e-05	0.000141	--	--	--	--	--	--	--	--	--	--	--	--	--	--	--	--	--	--	-	-	-
Unigene2005_All	498	22	2	1.8317	0.1568	3.5462	up	1.02e-05	0.000141	--	--	--	--	--	--	--	--	--	--	--	--	--	--	--	--	--	--	-	-	-
Unigene81441_All	482	22	2	1.8925	0.162	3.5462	up	1.02e-05	0.000141	gi|15237230|ref|NP_197706.1|	53.5	1e-07	Tudor/PWWP/MBT domain-containing protein [Arabidopsis thaliana] >gi|10177804|dbj|BAB11170.1| transcription factor-like protein [Arabidopsis thaliana] >gi|332005744|gb|AED93127.1| Tudor/PWWP/MBT domain-containing protein [Arabidopsis thaliana]	sp|Q9LK03|PERK2_ARATH	52.8	1e-06	Proline-rich receptor-like protein kinase PERK2 OS=Arabidopsis thaliana GN=PERK2 PE=2 SV=3	--	--	--	--	--	--	--	--	--	--	-	-	-
Unigene83294_All	341	22	2	2.6751	0.229	3.5462	up	1.02e-05	0.00014	gi|115485591|ref|NP_001067939.1|	77.8	4e-14	Os11g0498600 [Oryza sativa Japonica Group] >gi|113645161|dbj|BAF28302.1| Os11g0498600 [Oryza sativa Japonica Group]	sp|Q871R7|YOP1_NEUCR	205	8e-53	Protein yop-1 OS=Neurospora crassa GN=yop-1 PE=3 SV=1	YPR028w	112	2e-25	COG5052	Protein involved in membrane traffic	--	--	--	--	--	-	-	GO:0044464//cell part
Unigene86137_All	332	22	2	2.7476	0.2352	3.5462	up	1.02e-05	0.00014	--	--	--	--	--	--	--	--	--	--	--	--	--	--	--	--	--	--	-	-	-
Unigene85964_All	395	22	2	2.3094	0.1977	3.5461	up	1.02e-05	0.00014	--	--	--	--	--	--	--	--	--	--	--	--	--	--	--	--	--	--	-	-	-
Unigene79031_All	321	22	2	2.8417	0.2433	3.5459	up	1.02e-05	0.000141	gi|168022967|ref|XP_001764010.1|	85.9	1e-16	predicted protein [Physcomitrella patens subsp. patens] >gi|162684749|gb|EDQ71149.1| predicted protein [Physcomitrella patens subsp. patens]	sp|O06012|ADHB_BACSU	61.2	2e-09	Uncharacterized zinc-type alcohol dehydrogenase-like protein AdhB OS=Bacillus subtilis GN=adhB PE=3 SV=2	SMb20080	65.1	3e-11	COG1063	Threonine dehydrogenase and related Zn-dependent dehydrogenases	--	--	--	--	--	-	-	-
Unigene21910_All	617	22	2	1.4784	0.1266	3.5457	up	1.02e-05	0.000141	gi|326529079|dbj|BAK00933.1|	64.3	1e-09	predicted protein [Hordeum vulgare subsp. vulgare]	sp|Q10327|YD72_SCHPO	56.6	1e-07	Uncharacterized protein C32A11.02c OS=Schizosaccharomyces pombe (strain ATCC 38366 / 972) GN=SPAC32A11.02c PE=2 SV=1	--	--	--	--	--	--	--	--	--	--	-	-	-
Unigene82906_All	558	21	2	1.5605	0.1399	3.4795	up	1.93e-05	0.00025	gi|12620813|gb|AAG61086.1|AF325915_1	94.7	6e-19	5-aminolevulinate synthase [Euglena gracilis]	sp|Q7RVY5|HEM1_NEUCR	221	2e-57	5-aminolevulinate synthase, mitochondrial OS=Neurospora crassa GN=hem-1 PE=3 SV=2	YDR232w	148	6e-36	COG0156	7-keto-8-aminopelargonate synthetase and related enzymes	--	--	--	--	--	-	GO:0016740//transferase activity	-
Unigene38590_All	402	21	2	2.166	0.1942	3.4794	up	1.93e-05	0.00025	gi|219124318|ref|XP_002182454.1|	157	5e-38	transketolase [Phaeodactylum tricornutum CCAP 1055/1] >gi|217406415|gb|EEC46355.1| transketolase [Phaeodactylum tricornutum CCAP 1055/1]	sp|P23254|TKT1_YEAST	215	8e-56	Transketolase 1 OS=Saccharomyces cerevisiae (strain ATCC 204508 / S288c) GN=TKL1 PE=1 SV=4	YPR074c	215	2e-56	COG0021	Transketolase	K00615	7e-33	136	cre:CHLREDRAFT_141319	transketolase [EC:2.2.1.1]	-	GO:0016740//transferase activity	-
Unigene129185_All	365	21	2	2.3856	0.2139	3.4793	up	1.93e-05	0.00025	--	--	--	--	--	--	--	--	--	--	--	--	--	--	--	--	--	--	-	-	-
Unigene32033_All	758	21	2	1.1487	0.103	3.4793	up	1.93e-05	0.00025	--	--	--	--	--	--	--	--	--	--	--	--	--	--	--	--	--	--	-	-	-
Unigene84019_All	326	21	2	2.671	0.2395	3.4793	up	1.93e-05	0.00025	gi|75218951|sp|O04235.1|SSRP1_VICFA	57.4	5e-08	RecName: Full=FACT complex subunit SSRP1; AltName: Full=Facilitates chromatin transcription complex subunit SSRP1; AltName: Full=Recombination signal sequence recognition protein 1 >gi|2104679|emb|CAA66480.1| transcription factor [Vicia faba var. minor]	sp|Q7S045|NHP6_NEUCR	80.9	2e-15	Non-histone chromosomal protein 6 OS=Neurospora crassa GN=nhp-6 PE=3 SV=1	YBR089c-a	62.4	2e-10	COG5648	Chromatin-associated proteins containing the HMG domain	K09272	4e-09	57	rcu:RCOM_0855030	structure-specific recognition protein 1	GO:0006259//DNA metabolic process;GO:0010468//regulation of gene expression;GO:0033554//cellular response to stress;GO:0003006//reproductive developmental process	GO:0003676//nucleic acid binding;GO:0016628//oxidoreductase activity, acting on the CH-CH group of donors, NAD or NADP as acceptor	GO:0000790//nuclear chromatin;GO:0008023//transcription elongation factor complex
Unigene88587_All	352	21	2	2.4737	0.2218	3.4793	up	1.93e-05	0.00025	gi|18402952|ref|NP_566682.1|	125	2e-28	Core-2/I-branching beta-1,6-N-acetylglucosaminyltransferase family protein [Arabidopsis thaliana] >gi|115646862|gb|ABJ17144.1| At3g21310 [Arabidopsis thaliana] >gi|332642970|gb|AEE76491.1| Core-2/I-branching beta-1,6-N-acetylglucosaminyltransferase family protein [Arabidopsis thaliana]	--	--	--	--	--	--	--	--	--	--	--	--	--	--	-	GO:0008194//UDP-glycosyltransferase activity	GO:0044464//cell part
Unigene12320_All	355	42	4	4.9056	0.4399	3.4792	up	8.37e-10	2.29e-08	gi|15240154|ref|NP_200925.1|	112	2e-24	40S ribosomal protein S19-3 [Arabidopsis thaliana] >gi|297793669|ref|XP_002864719.1| 40S ribosomal protein S19 [Arabidopsis lyrata subsp. lyrata] >gi|27923837|sp|Q9FNP8.1|RS193_ARATH RecName: Full=40S ribosomal protein S19-3 >gi|9759463|dbj|BAB10379.1| 40S ribosomal protein S19 [Arabidopsis thaliana] >gi|34365671|gb|AAQ65147.1| At5g61170 [Arabidopsis thaliana] >gi|51970120|dbj|BAD43752.1| 40S rib…	sp|P27073|RS19_EMENI	178	8e-45	40S ribosomal protein S19 OS=Emericella nidulans GN=rps19 PE=3 SV=1	SPBC21C3.13	141	2e-34	COG2238	Ribosomal protein S19E (S16A)	K02966	1e-25	112	ppp:PHYPADRAFT_163322	small subunit ribosomal protein S19e	GO:0010467//gene expression	GO:0005198//structural molecule activity	GO:0015935//small ribosomal subunit;GO:0030312//external encapsulating structure;GO:0031981//nuclear lumen
Unigene22150_All	409	21	2	2.1289	0.1909	3.4792	up	1.93e-05	0.00025	--	--	--	--	--	--	--	--	--	--	--	--	--	--	--	--	--	--	-	-	-
Unigene49238_All	276	21	2	3.1548	0.2829	3.4792	up	1.93e-05	0.00025	--	--	--	--	--	--	--	--	--	--	--	--	--	--	--	--	--	--	-	-	-
Unigene83258_All	409	21	2	2.1289	0.1909	3.4792	up	1.93e-05	0.00025	--	--	--	--	--	--	--	--	--	--	--	--	--	--	--	--	--	--	-	-	-
Unigene38726_All	563	21	2	1.5466	0.1387	3.4791	up	1.93e-05	0.00025	gi|159464912|ref|XP_001690685.1|	192	2e-48	histone H4 [Chlamydomonas reinhardtii] >gi|159464996|ref|XP_001690721.1| histone H4 [Chlamydomonas reinhardtii] >gi|159465199|ref|XP_001690810.1| histone H4 [Chlamydomonas reinhardtii] >gi|159465235|ref|XP_001690828.1| histone H4 [Chlamydomonas reinhardtii] >gi|159465571|ref|XP_001690996.1| histone H4 [Chlamydomonas reinhardtii] >gi|159465583|ref|XP_001691002.1| histone H4 [Chlamydomonas reinhard…	sp|P04914|H4_NEUCR	201	3e-51	Histone H4 OS=Neurospora crassa GN=hhf-1 PE=3 SV=2	YNL030w	193	1e-49	COG2036	Histones H3 and H4	K11254	1e-49	192	cre:CHLREDRAFT_124889	histone H4	GO:0006950//response to stress;GO:0034728	GO:0003676//nucleic acid binding	GO:0000785//chromatin;GO:0016020//membrane;GO:0009536//plastid;GO:0031981//nuclear lumen
Unigene66529_All	416	21	2	2.0931	0.1877	3.4791	up	1.93e-05	0.00025	gi|303276476|ref|XP_003057532.1|	62.4	2e-09	predicted protein [Micromonas pusilla CCMP1545] >gi|226461884|gb|EEH59177.1| predicted protein [Micromonas pusilla CCMP1545]	--	--	--	--	SMc00431	85.1	3e-17	COG3791	Uncharacterized conserved protein	--	--	--	--	--	-	-	-
Unigene81264_All	224	21	2	3.8872	0.3486	3.4791	up	1.93e-05	0.00025	--	--	--	--	--	--	--	--	--	--	--	--	--	--	--	--	--	--	-	-	-
Unigene87377_All	482	21	2	1.8065	0.162	3.4791	up	1.93e-05	0.00025	gi|30683905|ref|NP_850121.1|	207	4e-69	beta-galactosidase 8 [Arabidopsis thaliana] >gi|152013364|sp|Q9SCV4.2|BGAL8_ARATH RecName: Full=Beta-galactosidase 8; Short=Lactase 8; AltName: Full=Protein AR782; Flags: Precursor >gi|330253033|gb|AEC08127.1| beta-galactosidase 8 [Arabidopsis thaliana]	sp|Q9SCV4|BGAL8_ARATH	207	2e-69	Beta-galactosidase 8 OS=Arabidopsis thaliana GN=BGAL8 PE=2 SV=2	--	--	--	--	--	K01190	1e-51	160	ath:AT3G52840	beta-galactosidase [EC:3.2.1.23]	-	-	-
Unigene87457_All	293	21	2	2.9718	0.2665	3.4791	up	1.93e-05	0.00025	--	--	--	--	--	--	--	--	--	--	--	--	--	--	--	--	--	--	-	-	-
Unigene15007_All	668	21	2	1.3035	0.1169	3.479	up	1.93e-05	0.00025	--	--	--	--	sp|A4R2R1|NST1_MAGO7	51.2	6e-06	Stress response protein NST1 OS=Magnaporthe oryzae (strain 70-15 / FGSC 8958) GN=NST1 PE=3 SV=1	--	--	--	--	--	--	--	--	--	--	-	-	-
Unigene65367_All	333	21	2	2.6148	0.2345	3.479	up	1.93e-05	0.00025	--	--	--	--	--	--	--	--	--	--	--	--	--	--	--	--	--	--	-	-	-
Unigene86105_All	312	21	2	2.7908	0.2503	3.4789	up	1.93e-05	0.00025	--	--	--	--	--	--	--	--	--	--	--	--	--	--	--	--	--	--	-	-	-
Unigene7914_All	759	21	2	1.1472	0.1029	3.4788	up	1.93e-05	0.00025	gi|10177143|dbj|BAB10503.1|	103	8e-39	retroelement pol polyprotein-like [Arabidopsis thaliana]	sp|P10978|POLX_TOBAC	69.7	9e-17	Retrovirus-related Pol polyprotein from transposon TNT 1-94 OS=Nicotiana tabacum PE=2 SV=1	--	--	--	--	--	--	--	--	--	--	-	GO:0005488//binding	-
Unigene75059_All	478	21	2	1.8216	0.1634	3.4787	up	1.93e-05	0.00025	--	--	--	--	--	--	--	--	--	--	--	--	--	--	--	--	--	--	-	-	-
Unigene44654_All	629	31	3	2.0435	0.1862	3.4561	up	1.71e-07	3.37e-06	--	--	--	--	--	--	--	--	--	--	--	--	--	--	--	--	--	--	-	-	-
Unigene53402_All	853	20	2	0.9722	0.0915	3.4094	up	3.67e-05	0.000444	--	--	--	--	--	--	--	--	--	--	--	--	--	--	--	--	--	--	-	-	-
Unigene45983_All	495	20	2	1.6753	0.1577	3.4092	up	3.67e-05	0.000444	--	--	--	--	--	--	--	--	--	--	--	--	--	--	--	--	--	--	-	-	-
Unigene6002_All	460	20	2	1.8028	0.1697	3.4092	up	3.67e-05	0.000444	--	--	--	--	--	--	--	--	--	--	--	--	--	--	--	--	--	--	-	-	-
Unigene35337_All	402	20	2	2.0629	0.1942	3.4091	up	3.67e-05	0.000444	--	--	--	--	--	--	--	--	--	--	--	--	--	--	--	--	--	--	-	-	-
Unigene66187_All	366	20	2	2.2658	0.2133	3.4091	up	3.67e-05	0.000444	--	--	--	--	--	--	--	--	--	--	--	--	--	--	--	--	--	--	-	-	-
Unigene12185_All	323	20	2	2.5674	0.2417	3.409	up	3.67e-05	0.000444	--	--	--	--	sp|Q02817|MUC2_HUMAN	48.9	1e-05	Mucin-2 OS=Homo sapiens GN=MUC2 PE=1 SV=2	--	--	--	--	--	--	--	--	--	--	-	-	-
Unigene1494_All	379	20	2	2.1881	0.206	3.409	up	3.67e-05	0.000444	gi|224136856|ref|XP_002326962.1|	107	6e-23	cytochrome P450 [Populus trichocarpa] >gi|222835277|gb|EEE73712.1| cytochrome P450 [Populus trichocarpa]	sp|O65790|C81F1_ARATH	87.4	2e-17	Cytochrome P450 81F1 OS=Arabidopsis thaliana GN=CYP81F1 PE=2 SV=2	alr1450	53.1	1e-07	COG2124	Cytochrome P450	K00517	5e-19	90.1	ath:AT4G37370	[EC:1.14.-.-]	GO:0008152//metabolic process	GO:0004497//monooxygenase activity;GO:0005506//iron ion binding	-
Unigene22934_All	484	20	2	1.7134	0.1613	3.409	up	3.67e-05	0.000444	--	--	--	--	--	--	--	--	--	--	--	--	--	--	--	--	--	--	-	-	-
Unigene75091_All	569	20	2	1.4574	0.1372	3.409	up	3.67e-05	0.000444	--	--	--	--	--	--	--	--	--	--	--	--	--	--	--	--	--	--	-	-	-
Unigene80223_All	240	20	2	3.4553	0.3253	3.409	up	3.67e-05	0.000444	--	--	--	--	--	--	--	--	--	--	--	--	--	--	--	--	--	--	-	-	-
Unigene1049_All	401	20	2	2.068	0.1947	3.4089	up	3.67e-05	0.000444	gi|115477549|ref|NP_001062370.1|	79.7	1e-14	Os08g0538300 [Oryza sativa Japonica Group] >gi|113624339|dbj|BAF24284.1| Os08g0538300 [Oryza sativa Japonica Group]	--	--	--	--	--	--	--	--	--	K13429	1e-15	79.3	rcu:RCOM_1115620	chitin elicitor receptor kinase 1	GO:0043170	GO:0004672//protein kinase activity;GO:0000166//nucleotide binding	GO:0031410//cytoplasmic vesicle
Unigene82348_All	379	40	4	4.3761	0.412	3.4089	up	2.99e-09	7.63e-08	--	--	--	--	--	--	--	--	--	--	--	--	--	--	--	--	--	--	-	-	-
Unigene86206_All	338	20	2	2.4535	0.231	3.4089	up	3.67e-05	0.000443	--	--	--	--	--	--	--	--	--	--	--	--	--	--	--	--	--	--	-	-	-
Unigene88645_All	550	40	4	3.0155	0.2839	3.4089	up	2.99e-09	7.62e-08	gi|308803907|ref|XP_003079266.1|	52.4	3e-06	inorganic phosphate transporter (ISS) [Ostreococcus tauri] >gi|116057721|emb|CAL53924.1| inorganic phosphate transporter (ISS) [Ostreococcus tauri]	sp|P38264|PHO88_YEAST	170	4e-42	Inorganic phosphate transport protein PHO88 OS=Saccharomyces cerevisiae (strain ATCC 204508 / S288c) GN=PHO88 PE=1 SV=1	YBR106w	170	1e-42	COG5065	Protein involved in inorganic phosphate transport	--	--	--	--	--	-	-	-
Unigene51655_All	390	20	2	2.1263	0.2002	3.4088	up	3.67e-05	0.000444	--	--	--	--	--	--	--	--	--	--	--	--	--	--	--	--	--	--	-	-	-
Unigene86564_All	350	20	2	2.3694	0.2231	3.4088	up	3.67e-05	0.000443	--	--	--	--	--	--	--	--	--	--	--	--	--	--	--	--	--	--	-	-	-
Unigene99169_All	715	20	2	1.1598	0.1092	3.4088	up	3.67e-05	0.000443	gi|3024527|sp|Q39433.1|RB1BV_BETVU	150	2e-35	RecName: Full=Ras-related protein RAB1BV >gi|974776|emb|CAA89021.1| small G protein [Beta vulgaris subsp. vulgaris]	sp|Q39433|RB1BV_BETVU	150	1e-35	Ras-related protein RAB1BV OS=Beta vulgaris GN=RAB1BV PE=2 SV=1	--	--	--	--	--	K07901	1e-27	120	rcu:RCOM_0249780	Ras-related protein Rab-8A	-	-	-
Unigene45505_All	295	20	2	2.8111	0.2647	3.4087	up	3.67e-05	0.000444	--	--	--	--	--	--	--	--	--	--	--	--	--	--	--	--	--	--	-	-	-
Unigene8345_All	394	50	5	5.2619	0.4955	3.4086	up	2.84e-11	9.18e-10	--	--	--	--	--	--	--	--	--	--	--	--	--	--	--	--	--	--	-	-	-
Unigene8486_All	341	30	3	3.6478	0.3435	3.4086	up	3.23e-07	6.07e-06	--	--	--	--	--	--	--	--	--	--	--	--	--	--	--	--	--	--	-	-	-
Unigene80842_All	290	20	2	2.8596	0.2693	3.4085	up	3.67e-05	0.000443	--	--	--	--	--	--	--	--	--	--	--	--	--	--	--	--	--	--	-	-	-
Unigene62013_All	599	20	2	1.3844	0.1304	3.4082	up	3.67e-05	0.000444	gi|224075858|ref|XP_002304799.1|	114	1e-24	multidrug resistance protein ABC transporter family [Populus trichocarpa] >gi|222842231|gb|EEE79778.1| multidrug resistance protein ABC transporter family [Populus trichocarpa]	sp|Q9LK64|AB3C_ARATH	108	3e-23	ABC transporter C family member 3 OS=Arabidopsis thaliana GN=ABCC3 PE=1 SV=1	SPAC3F10.11c	68.9	6e-12	COG1132	ABC-type multidrug transport system, ATPase and permease components	K05666	2e-06	50.1	olu:OSTLU_35503	ATP-binding cassette, subfamily C (CFTR/MRP), member 2	GO:0006810//transport;GO:0008152//metabolic process	GO:0071997;GO:0016628//oxidoreductase activity, acting on the CH-CH group of donors, NAD or NADP as acceptor;GO:0022891//substrate-specific transmembrane transporter activity;GO:0032559//adenyl ribonucleotide binding	GO:0031224//intrinsic to membrane;GO:0031090//organelle membrane;GO:0005576//extracellular region;GO:0005773//vacuole
Unigene82048_All	705	20	2	1.1763	0.1108	3.4082	up	3.67e-05	0.000443	gi|297803450|ref|XP_002869609.1|	72.4	5e-12	calcium ion binding protein [Arabidopsis lyrata subsp. lyrata] >gi|297315445|gb|EFH45868.1| calcium ion binding protein [Arabidopsis lyrata subsp. lyrata]	sp|Q52K82|CML21_ARATH	72	4e-12	Probable calcium-binding protein CML21 OS=Arabidopsis thaliana GN=CML21 PE=2 SV=1	--	--	--	--	--	K13448	1e-13	73.9	vvi:100256640	calcium-binding protein CML	-	-	-
Unigene18480_All	581	49	5	3.4969	0.336	3.3795	up	5.35e-11	1.68e-09	gi|225446662|ref|XP_002281788.1|	54.3	1e-06	PREDICTED: similar to shaggy-related protein kinase delta / ASK-delta / ASK-dzeta (ASK4) [Vitis vinifera]	sp|Q39010|KSG6_ARATH	52.4	2e-06	Shaggy-related protein kinase zeta OS=Arabidopsis thaliana GN=ASK6 PE=1 SV=2	--	--	--	--	--	K00924	3e-07	52.4	ath:AT2G30980	[EC:2.7.1.-]	-	-	-
Unigene53116_All	395	39	4	4.0939	0.3954	3.3721	up	5.62e-09	1.39e-07	gi|307136482|gb|ADN34283.1|	54.3	5e-07	ATP binding protein [Cucumis melo subsp. melo]	sp|Q01302|CCG6_NEUCR	79.3	7e-15	Clock-controlled protein 6 OS=Neurospora crassa GN=ccg-6 PE=2 SV=2	--	--	--	--	--	--	--	--	--	--	-	-	-
Unigene83071_All	231	29	3	5.2054	0.507	3.36	up	6.09e-07	1.09e-05	--	--	--	--	--	--	--	--	--	--	--	--	--	--	--	--	--	--	-	-	-
Unigene19875_All	694	29	3	1.7326	0.1688	3.3596	up	6.09e-07	1.09e-05	--	--	--	--	--	--	--	--	--	--	--	--	--	--	--	--	--	--	-	-	-
Unigene49693_All	443	77	8	7.207	0.705	3.3537	up	1.77e-16	8.91e-15	--	--	--	--	sp|Q9UVI4|THYD_CLAFS	85.5	1e-16	Trihydrophobin OS=Claviceps fusiformis GN=TH1 PE=1 SV=1	--	--	--	--	--	--	--	--	--	--	-	-	-
Unigene6559_All	841	19	2	0.9368	0.0928	3.3355	up	6.94e-05	0.000777	--	--	--	--	--	--	--	--	--	--	--	--	--	--	--	--	--	--	-	-	-
Unigene82271_All	886	19	2	0.8892	0.0881	3.3353	up	6.94e-05	0.000776	--	--	--	--	--	--	--	--	--	--	--	--	--	--	--	--	--	--	-	-	-
Unigene75107_All	526	19	2	1.4977	0.1484	3.3352	up	6.94e-05	0.000776	gi|255965554|gb|ACU45081.1|	155	2e-37	Rac1 [Pfiesteria piscicida]	sp|Q9C3Y4|RHOA_EMENI	263	5e-70	GTP-binding protein rhoA OS=Emericella nidulans GN=rhoA PE=3 SV=1	SPAC16A10.04	190	1e-48	COG1100	GTPase SAR1 and related small G proteins	K04392	2e-35	145	sbi:SORBI_04g001690	Ras-related C3 botulinum toxin substrate 1	-	-	-
Unigene80594_All	1128	19	2	0.6984	0.0692	3.3352	up	6.94e-05	0.000776	gi|23429644|gb|AAN10199.1|	352	6e-96	endoxylanase [Carica papaya]	sp|P26514|XYNA_STRLI	86.3	4e-16	Endo-1,4-beta-xylanase A OS=Streptomyces lividans GN=xlnA PE=1 SV=2	CAP0116	82	2e-15	COG3693	Beta-1,4-xylanase	--	--	--	--	--	GO:0005975//carbohydrate metabolic process	GO:0004553//hydrolase activity, hydrolyzing O-glycosyl compounds	-
Unigene33214_All	288	19	2	2.7355	0.2711	3.3349	up	6.94e-05	0.000777	--	--	--	--	--	--	--	--	--	--	--	--	--	--	--	--	--	--	-	-	-
Unigene48278_All	317	19	2	2.4852	0.2463	3.3349	up	6.94e-05	0.000777	--	--	--	--	--	--	--	--	--	--	--	--	--	--	--	--	--	--	-	-	-
Unigene59677_All	455	19	2	1.7315	0.1716	3.3349	up	6.94e-05	0.000777	--	--	--	--	--	--	--	--	--	--	--	--	--	--	--	--	--	--	-	-	-
Unigene13020_All	308	19	2	2.5578	0.2535	3.3348	up	6.94e-05	0.000777	--	--	--	--	--	--	--	--	--	--	--	--	--	--	--	--	--	--	-	-	-
Unigene23813_All	372	19	2	2.1178	0.2099	3.3348	up	6.94e-05	0.000777	gi|115485315|ref|NP_001067801.1|	89.4	1e-17	Os11g0433900 [Oryza sativa Japonica Group] >gi|313103599|pdb|3IZ5|NN Chain n, Localization Of The Large Subunit Ribosomal Proteins Into A 5.5 A Cryo-Em Map Of Triticum Aestivum Translating 80s Ribosome >gi|315113271|pdb|3IZR|NN Chain n, Localization Of The Large Subunit Ribosomal Proteins Into A 5.5 A Cryo-Em Map Of Triticum Aestivum Translating 80s Ribosome >gi|62734292|gb|AAX96401.1| Ribosomal …	sp|Q9C2B9|RL38_NEUCR	127	3e-29	60S ribosomal protein L38 OS=Neurospora crassa GN=rpl-38 PE=3 SV=1	--	--	--	--	--	K02923	6e-19	89.7	sbi:SORBI_02g035760	large subunit ribosomal protein L38e	GO:0010467//gene expression	GO:0005198//structural molecule activity	GO:0030529//ribonucleoprotein complex
Unigene34909_All	727	19	2	1.0836	0.1074	3.3348	up	6.94e-05	0.000777	gi|15224494|ref|NP_181370.1|	80.5	2e-14	PRA1 family protein B4 [Arabidopsis thaliana] >gi|75099986|sp|O80915.1|PR1B4_ARATH RecName: Full=PRA1 family protein B4; Short=AtPRA1.B4 >gi|38454104|gb|AAR20746.1| At2g38360 [Arabidopsis thaliana] >gi|45592910|gb|AAS68109.1| At2g38360 [Arabidopsis thaliana] >gi|330254433|gb|AEC09527.1| PRA1 family protein B4 [Arabidopsis thaliana]	sp|O80915|PR1B4_ARATH	80.5	1e-14	PRA1 family protein B4 OS=Arabidopsis thaliana GN=PRA1B4 PE=1 SV=1	--	--	--	--	--	--	--	--	--	--	GO:0006810//transport;GO:0009987//cellular process	GO:0005488//binding	GO:0043231//intracellular membrane-bounded organelle;GO:0016020//membrane
Unigene78536_All	293	19	2	2.6888	0.2665	3.3348	up	6.94e-05	0.000776	--	--	--	--	--	--	--	--	--	--	--	--	--	--	--	--	--	--	-	-	-
Unigene87722_All	301	19	2	2.6173	0.2594	3.3348	up	6.94e-05	0.000776	--	--	--	--	--	--	--	--	--	--	--	--	--	--	--	--	--	--	-	-	-
Unigene9230_All	297	19	2	2.6526	0.2629	3.3348	up	6.94e-05	0.000776	--	--	--	--	--	--	--	--	--	--	--	--	--	--	--	--	--	--	-	-	-
Unigene63389_All	448	19	2	1.7585	0.1743	3.3347	up	6.94e-05	0.000777	--	--	--	--	sp|O13780|YEO2_SCHPO	50.8	3e-06	Uncharacterized protein C17G6.02c OS=Schizosaccharomyces pombe (strain ATCC 38366 / 972) GN=SPAC17G6.02c PE=2 SV=1	--	--	--	--	--	--	--	--	--	--	-	-	-
Unigene66579_All	578	19	2	1.363	0.1351	3.3347	up	6.94e-05	0.000777	--	--	--	--	--	--	--	--	--	--	--	--	--	--	--	--	--	--	-	-	-
Unigene77699_All	430	19	2	1.8321	0.1816	3.3347	up	6.94e-05	0.000776	gi|162660666|gb|EDQ48479.1|	59.3	1e-08	predicted protein [Physcomitrella patens subsp. patens]	sp|Q9C168|CAT1_NEUCR	176	6e-44	Catalase-1 OS=Neurospora crassa GN=cat-1 PE=1 SV=2	DRA0259	81.3	5e-16	COG0753	Catalase	--	--	--	--	--	-	-	-
Unigene49758_All	475	38	4	3.3171	0.3288	3.3346	up	1.06e-08	2.51e-07	--	--	--	--	--	--	--	--	--	--	--	--	--	--	--	--	--	--	-	-	-
Unigene76549_All	310	19	2	2.5413	0.2519	3.3346	up	6.94e-05	0.000776	--	--	--	--	--	--	--	--	--	--	--	--	--	--	--	--	--	--	-	-	-
Unigene58122_All	545	19	2	1.4455	0.1433	3.3345	up	6.94e-05	0.000777	gi|226497516|ref|NP_001152372.1|	119	3e-26	MADS-box protein AGL66 [Zea mays] >gi|195655663|gb|ACG47299.1| MADS-box protein AGL66 [Zea mays]	sp|Q38836|AGL11_ARATH	88.2	3e-17	Agamous-like MADS-box protein AGL11 OS=Arabidopsis thaliana GN=AGL11 PE=2 SV=1	YPL089c	63.9	2e-10	COG5068	Regulator of arginine metabolism and related MADS box-containing transcription factors	K09264	6e-18	87.8	ath:AT3G58780	MADS-box transcription factor, plant	-	-	-
Unigene85020_All	774	19	2	1.0178	0.1009	3.3345	up	6.94e-05	0.000776	gi|87240899|gb|ABD32757.1|	73.9	2e-12	Integrase, catalytic region [Medicago truncatula]	--	--	--	--	--	--	--	--	--	--	--	--	--	--	-	GO:0005488//binding	-
Unigene86579_All	351	19	2	2.2445	0.2225	3.3345	up	6.94e-05	0.000776	gi|301119247|ref|XP_002907351.1|	120	7e-27	aldo/keto reductase family [Phytophthora infestans T30-4] >gi|262105863|gb|EEY63915.1| aldo/keto reductase family [Phytophthora infestans T30-4]	sp|O14088|YER5_SCHPO	125	8e-29	Uncharacterized oxidoreductase C2F3.05c OS=Schizosaccharomyces pombe (strain ATCC 38366 / 972) GN=SPAC2F3.05c PE=2 SV=1	SPAC2F3.05c	125	2e-29	COG0656	Aldo/keto reductases, related to diketogulonate reductase	K00002	2e-19	91.7	cme:CMM296C	alcohol dehydrogenase (NADP+) [EC:1.1.1.2]	-	-	-
Unigene81997_All	385	85	9	9.1543	0.9127	3.3262	up	6.2e-18	3.43e-16	--	--	--	--	--	--	--	--	--	--	--	--	--	--	--	--	--	--	-	-	-
Unigene39377_All	421	47	5	4.629	0.4637	3.3194	up	1.88e-10	5.55e-09	--	--	--	--	--	--	--	--	--	--	--	--	--	--	--	--	--	--	-	-	-
Unigene3450_All	603	28	3	1.9253	0.1942	3.3095	up	1.15e-06	1.94e-05	gi|41400384|gb|AAS07044.1|	80.5	1e-14	plus agglutinin [Chlamydomonas reinhardtii]	sp|Q9UTI9|YKZ2_SCHPO	87.8	5e-17	UPF0591 membrane protein C15E1.02c OS=Schizosaccharomyces pombe (strain ATCC 38366 / 972) GN=SPAC15E1.02c PE=2 SV=1	Rv3876	60.5	2e-09	COG0455	ATPases involved in chromosome partitioning	--	--	--	--	--	-	-	-
Unigene59366_All	520	28	3	2.2327	0.2252	3.3095	up	1.15e-06	1.94e-05	gi|124360182|gb|ABN08195.1|	267	4e-71	No apical meristem (NAM) protein [Medicago truncatula]	sp|Q9MA17|SMB_ARATH	260	3e-69	Protein SOMBRERO OS=Arabidopsis thaliana GN=SMB PE=1 SV=1	--	--	--	--	--	--	--	--	--	--	GO:0048856//anatomical structure development;GO:0000377//RNA splicing, via transesterification reactions with bulged adenosine as nucleophile;GO:0010468//regulation of gene expression;GO:0032501//multicellular organismal process;GO:0009832//plant-type cell wall biogenesis;GO:0010453	GO:0003676//nucleic acid binding;GO:0001071	GO:0016604//nuclear body;GO:0030529//ribonucleoprotein complex
Unigene22257_All	459	28	3	2.5294	0.2552	3.3091	up	1.15e-06	1.94e-05	--	--	--	--	--	--	--	--	--	--	--	--	--	--	--	--	--	--	-	-	-
Unigene50233_All	607	37	4	2.5274	0.2573	3.2961	up	1.98e-08	4.52e-07	gi|81074776|gb|ABB55374.1|	270	1e-71	ribosomal protein L2-like [Solanum tuberosum]	sp|Q75AP7|RL2_ASHGO	311	3e-84	60S ribosomal protein L2 OS=Ashbya gossypii (strain ATCC 10895 / CBS 109.51 / FGSC 9923 / NRRL Y-1056) GN=RPL2 PE=4 SV=1	YIL018w	307	1e-83	COG0090	Ribosomal protein L2	K02938	1e-72	269	ath:AT2G18020	large subunit ribosomal protein L8e	-	-	-
Unigene81206_All	491	37	4	3.1246	0.3181	3.2961	up	1.98e-08	4.52e-07	gi|21322711|emb|CAD22154.1|	122	2e-27	pherophorin-dz1 protein [Volvox carteri f. nagariensis]	sp|Q07202|CORA_MEDSA	120	4e-27	Cold and drought-regulated protein CORA OS=Medicago sativa GN=CORA PE=2 SV=1	XF0818	90.5	1e-18	COG2730	Endoglucanase	K12890	6e-23	103	cre:CHLREDRAFT_195849	splicing factor, arginine/serine-rich 1/9	-	-	GO:0031410//cytoplasmic vesicle
Unigene124648_All	239	129	14	22.38	2.287	3.2907	up	2.8e-26	2.36e-24	--	--	--	--	--	--	--	--	--	--	--	--	--	--	--	--	--	--	-	-	-
Unigene36416_All	307	27	3	3.6466	0.3815	3.2568	up	2.15e-06	3.43e-05	--	--	--	--	--	--	--	--	--	--	--	--	--	--	--	--	--	--	-	-	-
Unigene87448_All	269	27	3	4.1618	0.4354	3.2568	up	2.15e-06	3.43e-05	--	--	--	--	--	--	--	--	--	--	--	--	--	--	--	--	--	--	-	-	-
Unigene11987_All	664	45	5	2.81	0.294	3.2567	up	6.58e-10	1.82e-08	gi|117606933|gb|ABK42021.1|	80.5	2e-14	vegetative cell wall protein [Chlamydomonas incerta]	sp|Q9LK03|PERK2_ARATH	77.4	8e-14	Proline-rich receptor-like protein kinase PERK2 OS=Arabidopsis thaliana GN=PERK2 PE=2 SV=3	Rv3876	58.9	7e-09	COG0455	ATPases involved in chromosome partitioning	--	--	--	--	--	-	-	-
Unigene81758_All	420	27	3	2.6655	0.2789	3.2566	up	2.15e-06	3.43e-05	gi|56112311|gb|AAV71134.1|	197	3e-50	cytosolic class II fructose bisphosphate aldolase [Heterocapsa triquetra]	sp|Q96UH7|ALF1_PARBA	255	7e-68	Fructose-bisphosphate aldolase 1 OS=Paracoccidioides brasiliensis (strain ATCC MYA-826 / Pb01) GN=FBA1 PE=1 SV=3	YKL060c	215	2e-56	COG0191	Fructose/tagatose bisphosphate aldolase	K01624	4e-44	173	olu:OSTLU_94831	fructose-bisphosphate aldolase, class II [EC:4.1.2.13]	-	-	-
Unigene87516_All	363	27	3	3.0841	0.3227	3.2566	up	2.15e-06	3.43e-05	gi|66841324|dbj|BAD99220.1|	108	3e-23	polypeptide with an integrase domain [Petunia x hybrida]	sp|P10978|POLX_TOBAC	51.6	2e-06	Retrovirus-related Pol polyprotein from transposon TNT 1-94 OS=Nicotiana tabacum PE=2 SV=1	--	--	--	--	--	--	--	--	--	--	-	-	-
Unigene35708_All	1016	169	19	6.897	0.7301	3.2398	up	1.6e-33	1.81e-31	gi|25056007|gb|AAD55980.2|AF159297_1	78.6	1e-13	extensin-like protein [Zea mays]	sp|Q02817|MUC2_HUMAN	93.2	3e-18	Mucin-2 OS=Homo sapiens GN=MUC2 PE=1 SV=2	SPBC28F2.12	50.4	5e-06	COG0086	DNA-directed RNA polymerase, beta' subunit/160 kD subunit	K03006	1e-07	54.7	rcu:RCOM_0782880	DNA-directed RNA polymerase II subunit A [EC:2.7.7.6]	-	-	-
Unigene74399_All	885	62	7	2.9048	0.3088	3.2337	up	4.06e-13	1.57e-11	gi|38325813|gb|AAR17079.1|	545	1e-154	heat shock protein 70-2 [Nicotiana tabacum]	sp|Q01233|HSP70_NEUCR	545	2e-154	Heat shock 70 kDa protein OS=Neurospora crassa GN=hsps-1 PE=2 SV=2	YER103w	498	7e-141	COG0443	Molecular chaperone	K03283	2e-133	472	ath:AT3G12580	heat shock 70kDa protein 1/8	-	-	-
Unigene86459_All	299	53	6	7.3497	0.7834	3.2299	up	2.22e-11	7.24e-10	--	--	--	--	--	--	--	--	--	--	--	--	--	--	--	--	--	--	-	-	-
Unigene89706_All	409	53	6	5.373	0.5727	3.2299	up	2.22e-11	7.24e-10	--	--	--	--	--	--	--	--	--	--	--	--	--	--	--	--	--	--	-	-	-
Unigene11216_All	654	44	5	2.7896	0.2985	3.2243	up	1.23e-09	3.29e-08	gi|209967449|gb|ACJ02353.1|	203	2e-51	60S ribosomal protein L27A [Vernicia fordii]	sp|P78987|RL27A_ERYGR	273	7e-73	60S ribosomal protein L27a OS=Erysiphe graminis subsp. hordei PE=2 SV=1	YGL103w	253	2e-67	COG0200	Ribosomal protein L15	K02900	8e-53	204	rcu:RCOM_0024830	large subunit ribosomal protein L27Ae	GO:0010467//gene expression	GO:0005198//structural molecule activity	GO:0015934//large ribosomal subunit;GO:0031981//nuclear lumen
Unigene22323_All	346	35	4	4.1943	0.4513	3.2163	up	6.92e-08	1.45e-06	gi|87162616|gb|ABD28411.1|	52.4	2e-06	C33G8.2 , related [Medicago truncatula]	sp|Q6C1L3|PXR1_YARLI	53.1	5e-07	Protein PXR1 OS=Yarrowia lipolytica (strain CLIB 122 / E 150) GN=PXR1 PE=3 SV=1	--	--	--	--	--	K12821	7e-06	46.2	ppp:PHYPADRAFT_168393	pre-mRNA-processing factor 40	-	-	GO:0043229//intracellular organelle
Unigene78765_All	515	35	4	2.8179	0.3032	3.2163	up	6.92e-08	1.45e-06	gi|224011978|ref|XP_002294642.1|	192	1e-48	peroxidase/catalase [Thalassiosira pseudonana CCMP1335] >gi|220969662|gb|EED88002.1| peroxidase/catalase [Thalassiosira pseudonana CCMP1335]	sp|Q2H7U1|KATG_CHAGB	300	4e-81	Catalase-peroxidase OS=Chaetomium globosum GN=katG PE=3 SV=1	CC3043	269	2e-72	COG0376	Catalase (peroxidase I)	K03782	5e-72	267	zma:100382662	catalase/peroxidase [EC:1.11.1.6 1.11.1.7]	GO:0008152//metabolic process;GO:0006950//response to stress	GO:0005506//iron ion binding;GO:0004601//peroxidase activity	-
Unigene33482_All	513	35	4	2.8289	0.3044	3.2162	up	6.92e-08	1.45e-06	--	--	--	--	--	--	--	--	--	--	--	--	--	--	--	--	--	--	-	-	-
Unigene46307_All	1191	226	26	7.868	0.8523	3.2066	up	6.47e-44	1.02e-41	gi|206570199|gb|ACI12882.1|	278	1e-73	NAD-dependent alcohol dehydrogenase [Euglena gracilis]	sp|Q9P6C8|ADH1_NEUCR	546	9e-155	Alcohol dehydrogenase 1 OS=Neurospora crassa GN=adh-1 PE=3 SV=1	YMR083w	407	2e-113	COG1064	Zn-dependent alcohol dehydrogenases	K13953	2e-160	563	zma:100274539	alcohol dehydrogenase, propanol-preferring [EC:1.1.1.1]	GO:0008152//metabolic process	GO:0003824//catalytic activity;GO:0005488//binding	-
Unigene125220_All	234	26	3	4.6071	0.5005	3.2024	up	4.01e-06	6.07e-05	--	--	--	--	--	--	--	--	--	--	--	--	--	--	--	--	--	--	-	-	-
Unigene88694_All	404	26	3	2.6685	0.2899	3.2024	up	4.01e-06	6.07e-05	--	--	--	--	sp|Q07335|TOM22_NEUCR	79.3	7e-15	Mitochondrial import receptor subunit tom-22 OS=Neurospora crassa GN=tom-22 PE=2 SV=1	--	--	--	--	--	--	--	--	--	--	-	-	-
Unigene66547_All	376	26	3	2.8672	0.3115	3.2023	up	4.01e-06	6.07e-05	--	--	--	--	--	--	--	--	--	--	--	--	--	--	--	--	--	--	-	-	-
Unigene117898_All	508	26	3	2.1222	0.2306	3.2021	up	4.01e-06	6.07e-05	--	--	--	--	--	--	--	--	--	--	--	--	--	--	--	--	--	--	-	-	-
Unigene46803_All	463	26	3	2.3284	0.253	3.2021	up	4.01e-06	6.07e-05	--	--	--	--	--	--	--	--	--	--	--	--	--	--	--	--	--	--	-	-	-
Unigene47940_All	1222	190	22	6.4469	0.7029	3.1972	up	4.64e-37	5.93e-35	gi|307634614|gb|ADN78309.1|	238	1e-61	cinnamyl alcohol dehydrogenase [Salvia miltiorrhiza]	sp|Q04894|ADH6_YEAST	337	1e-91	NADP-dependent alcohol dehydrogenase 6 OS=Saccharomyces cerevisiae (strain ATCC 204508 / S288c) GN=ADH6 PE=1 SV=1	YMR318c	337	2e-92	COG1064	Zn-dependent alcohol dehydrogenases	K00083	2e-60	230	osa:4348690	cinnamyl-alcohol dehydrogenase [EC:1.1.1.195]	-	GO:0003824//catalytic activity;GO:0005488//binding	-
Unigene35928_All	667	69	8	4.2893	0.4683	3.1952	up	2.59e-14	1.11e-12	--	--	--	--	sp|Q550K8|Y7071_DICDI	58.2	5e-08	Probable serine/threonine-protein kinase DDB_G0277071 OS=Dictyostelium discoideum GN=DDB_G0277071 PE=3 SV=1	--	--	--	--	--	--	--	--	--	--	-	-	-
Unigene87891_All	754	34	4	1.8697	0.2071	3.1744	up	1.29e-07	2.58e-06	gi|238802664|emb|CAQ56037.1|	123	3e-27	2-isopropylmalate synthase, B genome specific 2 [Brassica juncea] >gi|238802666|emb|CAQ56038.1| 2-isopropylmalate synthase, B genome specific 2 [Brassica juncea]	sp|Q12122|HOSM_YEAST	389	1e-107	Homocitrate synthase, mitochondrial OS=Saccharomyces cerevisiae (strain ATCC 204508 / S288c) GN=LYS21 PE=1 SV=1	YDL131w	389	3e-108	COG0119	Isopropylmalate/homocitrate/citramalate synthases	K01649	4e-26	115	ath:AT5G23010	2-isopropylmalate synthase [EC:2.3.3.13]	-	-	-
Unigene9337_All	468	51	6	4.5185	0.5005	3.1744	up	7.65e-11	2.37e-09	--	--	--	--	--	--	--	--	--	--	--	--	--	--	--	--	--	--	-	-	-
Unigene74838_All	258	34	4	5.4642	0.6053	3.1743	up	1.29e-07	2.59e-06	gi|2493971|sp|Q41346.1|CYC_STELP	61.2	4e-09	RecName: Full=Cytochrome c >gi|440586|emb|CAA79708.1| mitochondrial cytochrome c [Stellaria longipes]	sp|P00042|CYC_HANAN	64.7	2e-10	Cytochrome c OS=Hansenula anomala PE=1 SV=1	YJR048w	58.5	3e-09	COG3474	Cytochrome c2	K08738	9e-09	55.8	olu:OSTLU_15043	cytochrome c	-	-	-
Unigene76668_All	481	34	4	2.9309	0.3247	3.1742	up	1.29e-07	2.59e-06	--	--	--	--	--	--	--	--	--	--	--	--	--	--	--	--	--	--	-	-	-
Unigene78964_All	339	34	4	4.1586	0.4607	3.1742	up	1.29e-07	2.59e-06	gi|301122321|ref|XP_002908887.1|	122	1e-27	40S ribosomal protein S10 [Phytophthora infestans T30-4] >gi|66270167|gb|AAY43413.1| ribosomal protein S10 [Phytophthora infestans] >gi|262099649|gb|EEY57701.1| 40S ribosomal protein S10 [Phytophthora infestans T30-4]	sp|Q08745|RS10A_YEAST	145	6e-35	40S ribosomal protein S10-A OS=Saccharomyces cerevisiae (strain ATCC 204508 / S288c) GN=RPS10A PE=1 SV=1	YOR293w	145	1e-35	COG5045	Ribosomal protein S10E	K02947	6e-47	182	zma:100382991	small subunit ribosomal protein S10e	-	-	GO:0030529//ribonucleoprotein complex
Unigene73379_All	810	109	13	5.5797	0.6266	3.1546	up	1.32e-21	8.94e-20	gi|325193311|emb|CCA27655.1|	78.2	1e-13	AlNc14C620G12260 [Albugo laibachii Nc14]	sp|Q4WYA5|PMP3_ASPFU	104	6e-22	Plasma membrane proteolipid 3 OS=Neosartorya fumigata (strain ATCC MYA-4609 / Af293 / CBS 101355 / FGSC A1100) GN=pmp3 PE=3 SV=1	SPBC713.11c	79.7	5e-15	COG0401	Uncharacterized homolog of Blt101	--	--	--	--	--	GO:0006972//hyperosmotic response	-	GO:0031224//intrinsic to membrane
Unigene62702_All	282	25	3	3.6759	0.4153	3.1459	up	7.48e-06	0.000107	--	--	--	--	--	--	--	--	--	--	--	--	--	--	--	--	--	--	-	-	-
Unigene26626_All	278	25	3	3.7287	0.4213	3.1458	up	7.48e-06	0.000107	gi|224126649|ref|XP_002329607.1|	60.5	6e-09	predicted protein [Populus trichocarpa] >gi|222870316|gb|EEF07447.1| predicted protein [Populus trichocarpa]	--	--	--	--	--	--	--	--	--	K02214	4e-10	60.5	pop:POPTR_852589	cell division control protein 7 [EC:2.7.11.1]	GO:0006464//protein modification process	GO:0004672//protein kinase activity;GO:0032559//adenyl ribonucleotide binding	-
Unigene77350_All	231	25	3	4.4874	0.507	3.1458	up	7.48e-06	0.000107	--	--	--	--	--	--	--	--	--	--	--	--	--	--	--	--	--	--	-	-	-
Unigene85725_All	449	50	6	4.6173	0.5217	3.1458	up	1.42e-10	4.24e-09	gi|302757603|ref|XP_002962225.1|	232	1e-60	ARF family GTPase [Selaginella moellendorffii] >gi|302763433|ref|XP_002965138.1| ARF family GTPase [Selaginella moellendorffii] >gi|300167371|gb|EFJ33976.1| ARF family GTPase [Selaginella moellendorffii] >gi|300170884|gb|EFJ37485.1| ARF family GTPase [Selaginella moellendorffii]	sp|P34727|ARF_AJECA	238	1e-62	ADP-ribosylation factor OS=Ajellomyces capsulata GN=ARF PE=1 SV=3	YDL137w	206	9e-54	COG1100	GTPase SAR1 and related small G proteins	K07977	3e-61	231	ath:AT1G70490	Arf/Sar family, other	GO:0035556;GO:0006810//transport	GO:0032561//guanyl ribonucleotide binding	GO:0043231//intracellular membrane-bounded organelle
Unigene86618_All	408	25	3	2.5407	0.2871	3.1456	up	7.48e-06	0.000107	gi|297722769|ref|NP_001173748.1|	106	8e-23	Os04g0142700 [Oryza sativa Japonica Group] >gi|255675151|dbj|BAH92476.1| Os04g0142700 [Oryza sativa Japonica Group]	--	--	--	--	--	--	--	--	--	--	--	--	--	--	-	-	-
Unigene8844_All	407	25	3	2.5469	0.2878	3.1456	up	7.48e-06	0.000107	--	--	--	--	--	--	--	--	--	--	--	--	--	--	--	--	--	--	-	-	-
Unigene73753_All	449	25	3	2.3087	0.2609	3.1455	up	7.48e-06	0.000107	--	--	--	--	--	--	--	--	--	--	--	--	--	--	--	--	--	--	-	-	-
Unigene54756_All	1049	58	7	2.2926	0.2605	3.1376	up	4.8e-12	1.67e-10	gi|11496133|gb|AAG36666.1|	326	3e-88	oxalate oxidase-like germin 171 [Beta vulgaris]	sp|Q9ZRA4|AB19A_PRUPE	198	6e-50	Auxin-binding protein ABP19a OS=Prunus persica GN=ABP19A PE=3 SV=1	--	--	--	--	--	--	--	--	--	--	-	GO:0046914//transition metal ion binding	GO:0005576//extracellular region
Unigene34078_All	643	58	7	3.7401	0.425	3.1375	up	4.8e-12	1.67e-10	gi|4585985|gb|AAD25621.1|AC005287_23	63.5	2e-09	Hypothetical protein [Arabidopsis thaliana]	--	--	--	--	--	--	--	--	--	--	--	--	--	--	-	-	GO:0031410//cytoplasmic vesicle;GO:0043231//intracellular membrane-bounded organelle
Unigene33517_All	712	33	4	1.9218	0.2193	3.1315	up	2.39e-07	4.61e-06	gi|219113077|ref|XP_002186122.1|	59.3	5e-08	glycoprotein precursor [Phaeodactylum tricornutum CCAP 1055/1] >gi|209582972|gb|ACI65592.1| glycoprotein precursor [Phaeodactylum tricornutum CCAP 1055/1]	sp|Q6S6W0|GP2_EHV1V	71.6	5e-12	Glycoprotein gp2 OS=Equine herpesvirus 1 (strain V592) GN=71 PE=3 SV=1	--	--	--	--	--	--	--	--	--	--	-	-	-
Unigene23924_All	416	33	4	3.2892	0.3754	3.1312	up	2.39e-07	4.61e-06	gi|195610706|gb|ACG27183.1|	102	1e-21	inorganic pyrophosphatase [Zea mays] >gi|195640904|gb|ACG39920.1| inorganic pyrophosphatase [Zea mays]	sp|Q6MVH7|IPYR_NEUCR	254	2e-67	Inorganic pyrophosphatase OS=Neurospora crassa GN=ipp-1 PE=3 SV=1	SPAC23C11.05	184	3e-47	COG0221	Inorganic pyrophosphatase	K01507	1e-22	102	pop:POPTR_557583	inorganic pyrophosphatase [EC:3.6.1.1]	-	-	GO:0043231//intracellular membrane-bounded organelle
Unigene82770_All	548	33	4	2.4969	0.285	3.1311	up	2.39e-07	4.61e-06	--	--	--	--	--	--	--	--	--	--	--	--	--	--	--	--	--	--	-	-	-
Unigene81728_All	489	41	5	3.4765	0.3992	3.1225	up	7.85e-09	1.9e-07	--	--	--	--	--	--	--	--	--	--	--	--	--	--	--	--	--	--	-	-	-
Unigene59411_All	1132	286	35	10.4758	1.2071	3.1174	up	9.84e-54	1.92e-51	gi|297723341|ref|NP_001174034.1|	65.1	2e-09	Os04g0545250 [Oryza sativa Japonica Group] >gi|255675661|dbj|BAH92762.1| Os04g0545250 [Oryza sativa Japonica Group]	sp|Q02817|MUC2_HUMAN	87	2e-16	Mucin-2 OS=Homo sapiens GN=MUC2 PE=1 SV=2	SPBC28F2.12	54.3	4e-07	COG0086	DNA-directed RNA polymerase, beta' subunit/160 kD subunit	K03006	2e-07	54.3	osa:4337831	DNA-directed RNA polymerase II subunit A [EC:2.7.7.6]	-	-	-
Unigene79139_All	397	49	6	5.1177	0.5901	3.1165	up	2.62e-10	7.62e-09	gi|255574822|ref|XP_002528318.1|	50.1	9e-06	hypothetical protein RCOM_0839150 [Ricinus communis] >gi|223532273|gb|EEF34076.1| hypothetical protein RCOM_0839150 [Ricinus communis]	--	--	--	--	--	--	--	--	--	--	--	--	--	--	-	-	-
Unigene6918_All	438	24	3	2.272	0.2674	3.0869	up	1.39e-05	0.000187	--	--	--	--	--	--	--	--	--	--	--	--	--	--	--	--	--	--	-	-	-
Unigene76958_All	530	40	5	3.1293	0.3683	3.0869	up	1.45e-08	3.38e-07	--	--	--	--	--	--	--	--	--	--	--	--	--	--	--	--	--	--	-	-	-
Unigene81154_All	384	24	3	2.5915	0.305	3.0869	up	1.39e-05	0.000186	--	--	--	--	--	--	--	--	--	--	--	--	--	--	--	--	--	--	-	-	-
Unigene81592_All	248	32	4	5.3502	0.6297	3.0869	up	4.42e-07	8.11e-06	gi|3219280|dbj|BAA28834.1|	85.9	1e-16	delta-9 fatty acid desaturase [Cyanidioschyzon merolae]	sp|Q12618|ACO1_AJECA	142	6e-34	Acyl-CoA desaturase OS=Ajellomyces capsulata GN=OLE1 PE=3 SV=1	SPCC1281.06c_2	89.4	2e-18	COG5274	Cytochrome b involved in lipid metabolism	K00507	3e-34	140	zma:100382970	stearoyl-CoA desaturase (delta-9 desaturase) [EC:1.14.19.1]	-	-	-
Unigene89357_All	285	40	5	5.8195	0.6849	3.0869	up	1.45e-08	3.38e-07	--	--	--	--	--	--	--	--	--	--	--	--	--	--	--	--	--	--	-	-	-
Unigene6502_All	914	48	6	2.1775	0.2563	3.0868	up	4.84e-10	1.36e-08	gi|3695393|gb|AAC62795.1|	93.2	4e-50	contains similarity to retroviral aspartyl proteases (Pfam: rvp.hmm, score: 11.80) [Arabidopsis thaliana]	sp|P92519|M810_ARATH	87.8	1e-23	Uncharacterized mitochondrial protein AtMg00810 OS=Arabidopsis thaliana GN=AtMg00810 PE=4 SV=1	--	--	--	--	--	K10760	5e-13	61.2	vvi:100247527	adenylate isopentenyltransferase (cytokinin synthase)	GO:0008152//metabolic process	GO:0046872//metal ion binding;GO:0003676//nucleic acid binding;GO:0003824//catalytic activity	-
Unigene83230_All	444	24	3	2.2413	0.2638	3.0868	up	1.39e-05	0.000186	--	--	--	--	--	--	--	--	--	--	--	--	--	--	--	--	--	--	-	-	-
Unigene10082_All	748	48	6	2.6608	0.3132	3.0867	up	4.84e-10	1.36e-08	gi|326526463|dbj|BAJ97248.1|	182	4e-45	predicted protein [Hordeum vulgare subsp. vulgare]	sp|Q0C7P6|EGLC_ASPTN	118	5e-26	Probable glucan endo-1,3-beta-glucosidase eglC OS=Aspergillus terreus (strain NIH 2624 / FGSC A1156) GN=eglC PE=3 SV=1	--	--	--	--	--	--	--	--	--	--	-	-	-
Unigene13364_All	349	32	4	3.8018	0.4475	3.0867	up	4.42e-07	8.11e-06	--	--	--	--	--	--	--	--	--	--	--	--	--	--	--	--	--	--	-	-	-
Unigene37782_All	498	24	3	1.9982	0.2352	3.0867	up	1.39e-05	0.000187	--	--	--	--	--	--	--	--	--	--	--	--	--	--	--	--	--	--	-	-	-
Unigene88629_All	503	32	4	2.6378	0.3105	3.0867	up	4.42e-07	8.1e-06	gi|2961349|emb|CAA18107.1|	242	2e-63	LTR retrotransposon like protein [Arabidopsis thaliana] >gi|7269049|emb|CAB79159.1| LTR retrotransposon like protein [Arabidopsis thaliana]	sp|P92519|M810_ARATH	142	1e-33	Uncharacterized mitochondrial protein AtMg00810 OS=Arabidopsis thaliana GN=AtMg00810 PE=4 SV=1	--	--	--	--	--	K10760	4e-12	68.2	vvi:100247527	adenylate isopentenyltransferase (cytokinin synthase)	GO:0006259//DNA metabolic process	GO:0046914//transition metal ion binding;GO:0003676//nucleic acid binding	-
Unigene12106_All	916	197	25	8.9174	1.0655	3.0651	up	6.77e-37	8.56e-35	--	--	--	--	--	--	--	--	--	--	--	--	--	--	--	--	--	--	-	-	-
Unigene89292_All	308	39	5	5.2503	0.6338	3.0503	up	2.67e-08	5.99e-07	--	--	--	--	--	--	--	--	--	--	--	--	--	--	--	--	--	--	-	-	-
Unigene12806_All	270	31	4	4.7606	0.5784	3.041	up	8.16e-07	1.43e-05	--	--	--	--	--	--	--	--	--	--	--	--	--	--	--	--	--	--	-	-	-
Unigene53165_All	266	31	4	4.8322	0.5871	3.041	up	8.16e-07	1.43e-05	--	--	--	--	--	--	--	--	--	--	--	--	--	--	--	--	--	--	-	-	-
Unigene62783_All	380	93	12	10.1477	1.2329	3.041	up	4.97e-18	2.78e-16	--	--	--	--	--	--	--	--	--	--	--	--	--	--	--	--	--	--	-	-	-
Unigene8695_All	525	31	4	2.4483	0.2975	3.0408	up	8.16e-07	1.43e-05	gi|115487356|ref|NP_001066165.1|	157	5e-38	Os12g0150100 [Oryza sativa Japonica Group] >gi|313103592|pdb|3IZ5|Y Chain Y, Localization Of The Large Subunit Ribosomal Proteins Into A 5.5 A Cryo-Em Map Of Triticum Aestivum Translating 80s Ribosome >gi|315113264|pdb|3IZR|Y Chain Y, Localization Of The Large Subunit Ribosomal Proteins Into A 5.5 A Cryo-Em Map Of Triticum Aestivum Translating 80s Ribosome >gi|113648672|dbj|BAF29184.1| Os12g01501…	sp|P51414|RL261_ARATH	156	8e-38	60S ribosomal protein L26-1 OS=Arabidopsis thaliana GN=RPL26A PE=2 SV=2	SPBC29B5.03c	155	3e-38	COG0198	Ribosomal protein L24	K02898	2e-39	158	pop:POPTR_819845	large subunit ribosomal protein L26e	GO:0006950//response to stress;GO:0010467//gene expression	GO:0005198//structural molecule activity	GO:0015934//large ribosomal subunit;GO:0016020//membrane;GO:0009536//plastid;GO:0031981//nuclear lumen
Unigene70155_All	2232	31	4	0.5759	0.07	3.0404	up	8.16e-07	1.43e-05	gi|15232200|ref|NP_186830.1|	246	8e-64	uncharacterized protein [Arabidopsis thaliana] >gi|334185021|ref|NP_001189790.1| uncharacterized protein [Arabidopsis thaliana] >gi|332640196|gb|AEE73717.1| uncharacterized protein [Arabidopsis thaliana] >gi|332640198|gb|AEE73719.1| uncharacterized protein [Arabidopsis thaliana]	--	--	--	--	--	--	--	--	--	--	--	--	--	--	-	-	-
Unigene128038_All	517	23	3	1.8446	0.2265	3.0257	up	2.57e-05	0.000322	gi|22331222|ref|NP_188715.2|	170	7e-42	Rossmann-fold NAD(P)-binding domain-containing protein [Arabidopsis thaliana] >gi|332642902|gb|AEE76423.1| Rossmann-fold NAD(P)-binding domain-containing protein [Arabidopsis thaliana]	--	--	--	--	--	--	--	--	--	--	--	--	--	--	GO:0008152//metabolic process	GO:0003824//catalytic activity	-
Unigene43422_All	807	23	3	1.1817	0.1451	3.0257	up	2.57e-05	0.000322	--	--	--	--	--	--	--	--	--	--	--	--	--	--	--	--	--	--	-	-	-
Unigene62886_All	807	23	3	1.1817	0.1451	3.0257	up	2.57e-05	0.000321	--	--	--	--	--	--	--	--	--	--	--	--	--	--	--	--	--	--	-	-	-
Unigene48133_All	291	23	3	3.2772	0.4025	3.0254	up	2.57e-05	0.000321	gi|147852615|emb|CAN81689.1|	67	7e-11	hypothetical protein VITISV_009754 [Vitis vinifera]	--	--	--	--	--	--	--	--	--	--	--	--	--	--	-	-	-
Unigene71257_All	276	23	3	3.4553	0.4244	3.0253	up	2.57e-05	0.000321	--	--	--	--	--	--	--	--	--	--	--	--	--	--	--	--	--	--	-	-	-
Unigene8636_All	220	53	7	9.989	1.2422	3.0074	up	1.01e-10	3.08e-09	--	--	--	--	--	--	--	--	--	--	--	--	--	--	--	--	--	--	-	-	-
Unigene77731_All	823	53	7	2.6702	0.3321	3.0073	up	1.01e-10	3.08e-09	gi|30679067|ref|NP_849593.1|	118	1e-25	lipid-binding serum glycoprotein-like protein [Arabidopsis thaliana] >gi|332189651|gb|AEE27772.1| lipid-binding serum glycoprotein-like protein [Arabidopsis thaliana]	sp|Q8VYC2|Y2070_ARATH	86.7	2e-16	Putative BPI/LBP family protein At3g20270 OS=Arabidopsis thaliana GN=At3g20270 PE=2 SV=1	--	--	--	--	--	K05399	2e-18	90.1	osa:4340853	lipopolysaccharide-binding protein	-	GO:0005488//binding	GO:0016020//membrane;GO:0031410//cytoplasmic vesicle;GO:0043231//intracellular membrane-bounded organelle
Unigene13593_All	785	30	4	1.5846	0.1989	2.994	up	1.5e-06	2.5e-05	gi|87162739|gb|ABD28534.1|	154	1e-36	Amino acid/polyamine transporter I [Medicago truncatula]	sp|P30825|CTR1_HUMAN	79	4e-14	High affinity cationic amino acid transporter 1 OS=Homo sapiens GN=SLC7A1 PE=1 SV=1	Rv2320c	81.3	2e-15	COG0531	Amino acid transporters	K03294	1e-11	67.8	ppp:PHYPADRAFT_152313	basic amino acid/polyamine antiporter, APA family	GO:0009267//cellular response to starvation;GO:0009416//response to light stimulus;GO:0019725//cellular homeostasis;GO:0042743//hydrogen peroxide metabolic process;GO:0015837//amine transport	GO:0005275//amine transmembrane transporter activity;GO:0046914//transition metal ion binding;GO:0004601//peroxidase activity	GO:0031224//intrinsic to membrane;GO:0005840//ribosome;GO:0000325//plant-type vacuole;GO:0009526//plastid envelope;GO:0042579//microbody
Unigene88627_All	524	30	4	2.3739	0.298	2.9939	up	1.5e-06	2.49e-05	--	--	--	--	--	--	--	--	mll4859	77.8	9e-15	COG3791	Uncharacterized conserved protein	--	--	--	--	--	-	-	-
Unigene52851_All	238	30	4	5.2265	0.6562	2.9936	up	1.5e-06	2.49e-05	--	--	--	--	--	--	--	--	--	--	--	--	--	--	--	--	--	--	-	-	-
Unigene76365_All	522	30	4	2.383	0.2992	2.9936	up	1.5e-06	2.49e-05	--	--	--	--	--	--	--	--	--	--	--	--	--	--	--	--	--	--	-	-	-
Unigene54837_All	1209	30	4	1.0289	0.1292	2.9934	up	1.5e-06	2.49e-05	--	--	--	--	--	--	--	--	--	--	--	--	--	--	--	--	--	--	-	-	-
Unigene82330_All	888	30	4	1.4008	0.1759	2.9934	up	1.5e-06	2.49e-05	gi|6017938|gb|AAF01694.1|AF181456_1	97.8	2e-19	dehydrin [Hordeum vulgare subsp. vulgare]	sp|P46526|CS66_WHEAT	79	4e-14	Cold shock protein CS66 OS=Triticum aestivum GN=CS66 PE=2 SV=1	XF0818	53.1	6e-07	COG2730	Endoglucanase	--	--	--	--	--	-	-	-
Unigene79102_All	438	22	3	2.0827	0.2674	2.9614	up	4.73e-05	0.000553	--	--	--	--	--	--	--	--	--	--	--	--	--	--	--	--	--	--	-	-	-
Unigene85639_All	369	22	3	2.4721	0.3174	2.9614	up	4.73e-05	0.000553	--	--	--	--	--	--	--	--	--	--	--	--	--	--	--	--	--	--	-	-	-
Unigene89323_All	284	22	3	3.212	0.4124	2.9614	up	4.73e-05	0.000553	--	--	--	--	--	--	--	--	--	--	--	--	--	--	--	--	--	--	-	-	-
Unigene51139_All	389	22	3	2.345	0.3011	2.9613	up	4.73e-05	0.000553	--	--	--	--	--	--	--	--	--	--	--	--	--	--	--	--	--	--	-	-	-
Unigene78274_All	417	154	21	15.3127	1.9661	2.9613	up	3.16e-28	2.9e-26	--	--	--	--	--	--	--	--	--	--	--	--	--	--	--	--	--	--	-	-	-
Unigene87517_All	241	22	3	3.7851	0.486	2.9613	up	4.73e-05	0.000553	--	--	--	--	--	--	--	--	--	--	--	--	--	--	--	--	--	--	-	-	-
Unigene53195_All	570	22	3	1.6004	0.2055	2.9612	up	4.73e-05	0.000553	gi|1351858|sp|P49609.1|ACON_GRAVE	279	1e-74	RecName: Full=Aconitate hydratase, mitochondrial; Short=Aconitase; AltName: Full=Citrate hydro-lyase; Flags: Precursor >gi|600171|gb|AAA80494.1| aconitase [Gracilaria gracilis]	sp|O13966|ACON_SCHPO	291	2e-78	Aconitate hydratase, mitochondrial OS=Schizosaccharomyces pombe (strain ATCC 38366 / 972) GN=SPAC24C9.06c PE=2 SV=1	SPAC24C9.06c	291	6e-79	COG1048	Aconitase A	K01681	7e-75	276	cre:CHLREDRAFT_129025	aconitate hydratase 1 [EC:4.2.1.3]	GO:0009060//aerobic respiration	GO:0043169//cation binding;GO:0016491//oxidoreductase activity;GO:0051536//iron-sulfur cluster binding;GO:0016836//hydro-lyase activity	GO:0043231//intracellular membrane-bounded organelle
Unigene11683_All	572	22	3	1.5948	0.2048	2.9611	up	4.73e-05	0.000553	gi|323454929|gb|EGB10798.1|	68.6	5e-11	hypothetical protein AURANDRAFT_5443 [Aureococcus anophagefferens]	--	--	--	--	--	--	--	--	--	--	--	--	--	--	-	-	-
Unigene55046_All	551	22	3	1.6555	0.2126	2.9611	up	4.73e-05	0.000553	--	--	--	--	--	--	--	--	--	--	--	--	--	--	--	--	--	--	-	-	-
Unigene8144_All	510	22	3	1.7886	0.2297	2.961	up	4.73e-05	0.000553	--	--	--	--	--	--	--	--	--	--	--	--	--	--	--	--	--	--	-	-	-
Unigene69046_All	893	22	3	1.0215	0.1312	2.9608	up	4.73e-05	0.000553	gi|225445090|ref|XP_002280419.1|	133	3e-30	PREDICTED: similar to ceramide glucosyltransferase [Vitis vinifera]	--	--	--	--	--	--	--	--	--	--	--	--	--	--	-	GO:0016740//transferase activity	GO:0044464//cell part
Unigene59540_All	850	29	4	1.4146	0.1837	2.945	up	2.75e-06	4.32e-05	--	--	--	--	--	--	--	--	--	--	--	--	--	--	--	--	--	--	-	-	-
Unigene65114_All	531	29	4	2.2645	0.2941	2.9448	up	2.75e-06	4.32e-05	gi|15219860|ref|NP_176303.1|	63.2	2e-09	hydroxyproline-rich glycoprotein-like protein [Arabidopsis thaliana] >gi|332195654|gb|AEE33775.1| hydroxyproline-rich glycoprotein-like protein [Arabidopsis thaliana]	sp|Q9FLQ7|FH20_ARATH	62.4	2e-09	Formin-like protein 20 OS=Arabidopsis thaliana GN=FH20 PE=2 SV=3	CC3494_1	52	6e-07	COG3637	Opacity protein and related surface antigens	--	--	--	--	--	-	GO:0005488//binding	GO:0005618//cell wall
Unigene24410_All	426	29	4	2.8226	0.3666	2.9447	up	2.75e-06	4.32e-05	gi|115470543|ref|NP_001058870.1|	63.9	6e-10	Os07g0142300 [Oryza sativa Japonica Group] >gi|34393335|dbj|BAC83283.1| early nodulin 75 precursor-like protein [Oryza sativa Japonica Group] >gi|113610406|dbj|BAF20784.1| Os07g0142300 [Oryza sativa Japonica Group]	sp|Q62598|DSPP_RAT	61.6	1e-09	Dentin sialophosphoprotein OS=Rattus norvegicus GN=Dspp PE=1 SV=2	DR1769	47.4	8e-06	COG1520	FOG: WD40-like repeat	K03252	4e-06	47.8	cme:CMH126C	translation initiation factor eIF-3 subunit 8	-	-	-
Unigene85394_All	469	29	4	2.5639	0.333	2.9447	up	2.75e-06	4.32e-05	--	--	--	--	--	--	--	--	--	--	--	--	--	--	--	--	--	--	-	-	-
Unigene35658_All	580	36	5	2.5736	0.3366	2.9347	up	1.65e-07	3.26e-06	--	--	--	--	--	--	--	--	--	--	--	--	--	--	--	--	--	--	-	-	-
Unigene48736_All	327	36	5	4.5648	0.597	2.9347	up	1.65e-07	3.26e-06	--	--	--	--	--	--	--	--	--	--	--	--	--	--	--	--	--	--	-	-	-
Unigene23415_All	413	57	8	5.7226	0.7563	2.9196	up	3.84e-11	1.23e-09	--	--	--	--	--	--	--	--	--	--	--	--	--	--	--	--	--	--	-	-	-
Unigene76123_All	736	21	3	1.1831	0.1591	2.8946	up	8.67e-05	0.000943	gi|8843739|dbj|BAA97287.1|	215	4e-55	retroelement pol polyprotein-like [Arabidopsis thaliana]	sp|P10978|POLX_TOBAC	141	4e-33	Retrovirus-related Pol polyprotein from transposon TNT 1-94 OS=Nicotiana tabacum PE=2 SV=1	--	--	--	--	--	--	--	--	--	--	-	GO:0005488//binding	-
Unigene9153_All	361	21	3	2.412	0.3244	2.8944	up	8.67e-05	0.000943	--	--	--	--	--	--	--	--	--	--	--	--	--	--	--	--	--	--	-	-	-
Unigene21171_All	1371	28	4	0.8468	0.1139	2.8943	up	5.03e-06	7.47e-05	gi|224074167|ref|XP_002304283.1|	492	1e-138	formyltetrahydrofolate deformylase [Populus trichocarpa] >gi|222841715|gb|EEE79262.1| formyltetrahydrofolate deformylase [Populus trichocarpa]	sp|O34990|PURU_BACSU	195	8e-49	Formyltetrahydrofolate deformylase OS=Bacillus subtilis GN=purU PE=3 SV=2	aq_1818	215	1e-55	COG0788	Formyltetrahydrofolate hydrolase	K01433	4e-139	492	pop:POPTR_646120	formyltetrahydrofolate deformylase [EC:3.5.1.10]	-	-	-
Unigene51385_All	347	21	3	2.5093	0.3375	2.8943	up	8.67e-05	0.000944	gi|307109023|gb|EFN57262.1|	61.6	3e-09	expressed protein [Chlorella variabilis]	sp|Q4WG16|EGLC_ASPFU	134	2e-31	Probable glucan endo-1,3-beta-glucosidase eglC OS=Neosartorya fumigata (strain ATCC MYA-4609 / Af293 / CBS 101355 / FGSC A1100) GN=eglC PE=3 SV=1	YPO2725	53.1	1e-07	COG3501	Uncharacterized protein conserved in bacteria	K00558	3e-06	47.4	cre:CHLREDRAFT_15852	DNA (cytosine-5-)-methyltransferase [EC:2.1.1.37]	-	-	-
Unigene51480_All	574	56	8	4.0452	0.5441	2.8943	up	6.97e-11	2.17e-09	gi|42562634|ref|NP_175405.2|	98.2	6e-20	ethylene-responsive protein-related protein [Arabidopsis thaliana] >gi|332194360|gb|AEE32481.1| ethylene-responsive protein-related protein [Arabidopsis thaliana]	sp|Q9LT67|BH113_ARATH	94	6e-19	Transcription factor bHLH113 OS=Arabidopsis thaliana GN=BHLH113 PE=2 SV=1	--	--	--	--	--	--	--	--	--	--	GO:0010468//regulation of gene expression	-	GO:0043231//intracellular membrane-bounded organelle
Unigene72634_All	737	70	10	3.9382	0.5297	2.8943	up	2.74e-13	1.07e-11	gi|151337348|gb|ABS01106.1|	54.3	2e-06	D-hordein [Hordeum chilense]	sp|Q9VM71|XRN2_DROME	54.3	8e-07	5'-3' exoribonuclease 2 homolog OS=Drosophila melanogaster GN=Rat1 PE=1 SV=2	--	--	--	--	--	K11596	4e-06	49.3	ppp:PHYPADRAFT_205541	argonaute	-	-	-
Unigene81680_All	244	21	3	3.5686	0.48	2.8943	up	8.67e-05	0.000943	--	--	--	--	--	--	--	--	--	--	--	--	--	--	--	--	--	--	-	-	-
Unigene36704_All	316	28	4	3.674	0.4942	2.8942	up	5.03e-06	7.46e-05	--	--	--	--	--	--	--	--	--	--	--	--	--	--	--	--	--	--	-	-	-
Unigene65394_All	295	35	5	4.9194	0.6617	2.8942	up	3e-07	5.67e-06	--	--	--	--	--	--	--	--	--	--	--	--	--	--	--	--	--	--	-	-	-
Unigene7351_All	423	21	3	2.0585	0.2769	2.8942	up	8.67e-05	0.000943	--	--	--	--	--	--	--	--	--	--	--	--	--	--	--	--	--	--	-	-	-
Unigene25648_All	388	21	3	2.2442	0.3019	2.8941	up	8.67e-05	0.000944	--	--	--	--	--	--	--	--	--	--	--	--	--	--	--	--	--	--	-	-	-
Unigene28387_All	495	28	4	2.3454	0.3155	2.8941	up	5.03e-06	7.46e-05	gi|109676352|gb|ABG37658.1|	193	9e-49	integrase [Populus trichocarpa]	sp|Q8I7P9|POL5_DROME	97.4	4e-20	Retrovirus-related Pol polyprotein from transposon opus OS=Drosophila melanogaster GN=pol PE=4 SV=1	SPAC9.04	72.8	3e-13	COG2801	Transposase and inactivated derivatives	--	--	--	--	--	GO:0006260//DNA replication	GO:0046914//transition metal ion binding;GO:0003676//nucleic acid binding;GO:0034061	-
Unigene49228_All	336	28	4	3.4553	0.4648	2.8941	up	5.03e-06	7.46e-05	gi|297844308|ref|XP_002890035.1|	100	4e-21	kinase family protein [Arabidopsis lyrata subsp. lyrata] >gi|297335877|gb|EFH66294.1| kinase family protein [Arabidopsis lyrata subsp. lyrata]	sp|Q9FKG5|PUB51_ARATH	50.4	3e-06	U-box domain-containing protein 51 OS=Arabidopsis thaliana GN=PUB51 PE=2 SV=2	--	--	--	--	--	K12132	1e-06	48.9	pop:POPTR_1096507	serine/threonine-protein kinase WNK1 [EC:2.7.11.1]	GO:0043401;GO:0010051//xylem and phloem pattern formation;GO:0007165//signal transduction;GO:0006464//protein modification process	GO:0004713//protein tyrosine kinase activity;GO:0032559//adenyl ribonucleotide binding	-
Unigene87754_All	277	28	4	4.1913	0.5638	2.8941	up	5.03e-06	7.46e-05	gi|226504448|ref|NP_001146988.1|	71.6	3e-12	60S ribosomal protein L44 [Zea mays] >gi|195605978|gb|ACG24819.1| 60S ribosomal protein L44 [Zea mays] >gi|195606184|gb|ACG24922.1| 60S ribosomal protein L44 [Zea mays] >gi|195620316|gb|ACG31988.1| 60S ribosomal protein L44 [Zea mays] >gi|195623550|gb|ACG33605.1| 60S ribosomal protein L44 [Zea mays] >gi|195656257|gb|ACG47596.1| 60S ribosomal protein L44 [Zea mays]	sp|Q6CFS7|RL44_YARLI	87	3e-17	60S ribosomal protein L44 OS=Yarrowia lipolytica (strain CLIB 122 / E 150) GN=RPL44 PE=3 SV=3	YNL162w	83.6	8e-17	COG1631	Ribosomal protein L44E	K02929	9e-14	72.4	pop:POPTR_749327	large subunit ribosomal protein L44e	-	-	-
Unigene123031_All	288	41	6	5.9028	0.8134	2.8594	up	3.31e-08	7.31e-07	--	--	--	--	--	--	--	--	--	--	--	--	--	--	--	--	--	--	-	-	-
Unigene54333_All	1498	41	6	1.1349	0.1564	2.8593	up	3.31e-08	7.3e-07	gi|226531430|ref|NP_001149888.1|	132	1e-29	copper chaperone [Zea mays] >gi|195635277|gb|ACG37107.1| copper chaperone [Zea mays]	sp|Q9T0K5|LRX3_ARATH	80.1	4e-14	Leucine-rich repeat extensin-like protein 3 OS=Arabidopsis thaliana GN=LRX3 PE=1 SV=1	Rv1078	52.4	2e-06	COG1714	Predicted membrane protein/domain	K13095	4e-11	67.4	sbi:SORBI_01g038690	splicing factor 1	GO:0006812//cation transport	GO:0043169//cation binding	-
Unigene71895_All	1505	735	108	20.2497	2.8017	2.8535	up	5.46e-124	2.72e-121	gi|297723341|ref|NP_001174034.1|	72.8	1e-11	Os04g0545250 [Oryza sativa Japonica Group] >gi|255675661|dbj|BAH92762.1| Os04g0545250 [Oryza sativa Japonica Group]	sp|P47001|CIS3_YEAST	115	7e-25	Cell wall mannoprotein CIS3 OS=Saccharomyces cerevisiae (strain ATCC 204508 / S288c) GN=CIS3 PE=1 SV=1	--	--	--	--	--	--	--	--	--	--	-	-	-
Unigene49386_All	577	34	5	2.4433	0.3383	2.8525	up	5.46e-07	9.82e-06	gi|54606709|dbj|BAD66732.1|	63.5	2e-09	orf147a [Beta vulgaris subsp. vulgaris] >gi|54606753|dbj|BAD66776.1| orf147a [Beta vulgaris subsp. vulgaris]	--	--	--	--	--	--	--	--	--	--	--	--	--	--	-	-	-
Unigene47183_All	893	61	9	2.8323	0.3935	2.8475	up	1.43e-11	4.75e-10	gi|223996187|ref|XP_002287767.1|	326	2e-88	ran-type small G protein [Thalassiosira pseudonana CCMP1335] >gi|220976883|gb|EED95210.1| ran-type small G protein [Thalassiosira pseudonana CCMP1335]	sp|Q7RVL0|GSP1_NEUCR	372	2e-102	GTP-binding nuclear protein GSP1/Ran OS=Neurospora crassa GN=gsp-1 PE=2 SV=1	ECU04g1560	148	1e-35	COG1100	GTPase SAR1 and related small G proteins	K07936	1e-86	317	olu:OSTLU_41856	GTP-binding nuclear protein Ran	-	-	-
Unigene261_All	1606	27	4	0.6971	0.0972	2.8423	up	9.16e-06	0.000128	gi|115471081|ref|NP_001059139.1|	87.8	4e-16	Os07g0203300 [Oryza sativa Japonica Group] >gi|113610675|dbj|BAF21053.1| Os07g0203300 [Oryza sativa Japonica Group]	sp|Q6NS46|RRP5_MOUSE	61.6	2e-08	Protein RRP5 homolog OS=Mus musculus GN=Pdcd11 PE=2 SV=2	--	--	--	--	--	--	--	--	--	--	-	-	-
Unigene65247_All	503	54	8	4.4514	0.6209	2.8418	up	2.28e-10	6.68e-09	--	--	--	--	--	--	--	--	--	--	--	--	--	--	--	--	--	--	-	-	-
Unigene68221_All	325	27	4	3.4447	0.4805	2.8418	up	9.16e-06	0.000128	gi|297848380|ref|XP_002892071.1|	54.7	4e-07	zinc finger family protein [Arabidopsis lyrata subsp. lyrata] >gi|297337913|gb|EFH68330.1| zinc finger family protein [Arabidopsis lyrata subsp. lyrata]	sp|Q9FNG6|C3H51_ARATH	54.7	2e-07	Zinc finger CCCH domain-containing protein 51 OS=Arabidopsis thaliana GN=At5g06420 PE=2 SV=1	--	--	--	--	--	K13127	8e-10	59.3	vvi:100251778	RING finger protein 113A	-	-	-
Unigene70953_All	434	27	4	2.5795	0.3598	2.8418	up	9.16e-06	0.000128	--	--	--	--	--	--	--	--	--	--	--	--	--	--	--	--	--	--	-	-	-
Unigene87810_All	272	27	4	4.1159	0.5741	2.8418	up	9.16e-06	0.000128	--	--	--	--	--	--	--	--	--	--	--	--	--	--	--	--	--	--	-	-	-
Unigene52052_All	323	27	4	3.466	0.4835	2.8417	up	9.16e-06	0.000128	--	--	--	--	--	--	--	--	--	--	--	--	--	--	--	--	--	--	-	-	-
Unigene81698_All	294	27	4	3.8079	0.5312	2.8417	up	9.16e-06	0.000128	--	--	--	--	--	--	--	--	--	--	--	--	--	--	--	--	--	--	-	-	-
Unigene83309_All	416	27	4	2.6912	0.3754	2.8417	up	9.16e-06	0.000128	--	--	--	--	--	--	--	--	--	--	--	--	--	--	--	--	--	--	-	-	-
Unigene76294_All	577	27	4	1.9402	0.2707	2.8414	up	9.16e-06	0.000128	--	--	--	--	--	--	--	--	--	--	--	--	--	--	--	--	--	--	-	-	-
Unigene62725_All	526	256	38	20.18	2.8205	2.8389	up	4.95e-44	7.8e-42	gi|6094077|sp|O82713.1|RL41_QUESU	50.8	9e-06	RecName: Full=60S ribosomal protein L41 >gi|3492819|emb|CAA04691.1| RPL41 [Quercus suber]	sp|Q7KF89|RL41_SPOFR	52	2e-06	60S ribosomal protein L41 OS=Spodoptera frugiperda GN=RpL41 PE=3 SV=1	--	--	--	--	--	K02928	1e-06	50.1	cre:CHLREDRAFT_195610	large subunit ribosomal protein L41e	-	-	-
Unigene69900_All	1684	451	67	11.1046	1.5533	2.8377	up	2.61e-76	7.22e-74	gi|301105317|ref|XP_002901742.1|	553	1e-156	aldehyde dehydrogenase, mitochondrial precursor [Phytophthora infestans T30-4] >gi|262099080|gb|EEY57132.1| aldehyde dehydrogenase, mitochondrial precursor [Phytophthora infestans T30-4]	sp|P40108|ALDH_DAVTA	760	0	Aldehyde dehydrogenase OS=Davidiella tassiana GN=CLAH10 PE=1 SV=2	SPAC9E9.09c	625	9e-179	COG1012	NAD-dependent aldehyde dehydrogenases	K00128	8e-162	568	zma:100382968	aldehyde dehydrogenase (NAD+) [EC:1.2.1.3]	-	-	-
Unigene84941_All	490	74	11	6.2619	0.8764	2.8369	up	1.02e-13	4.18e-12	gi|158828138|gb|ABW81017.1|	162	2e-39	gag-pol polymerase [Arabidopsis lyrata subsp. lyrata]	sp|P10978|POLX_TOBAC	59.3	1e-08	Retrovirus-related Pol polyprotein from transposon TNT 1-94 OS=Nicotiana tabacum PE=2 SV=1	--	--	--	--	--	--	--	--	--	--	-	GO:0005488//binding	GO:0044464//cell part
Unigene22618_All	659	47	7	2.9572	0.4147	2.8341	up	3.68e-09	9.29e-08	gi|159481082|ref|XP_001698611.1|	65.1	7e-10	hydroxyproline-rich cell wall protein [Chlamydomonas reinhardtii] >gi|158282351|gb|EDP08104.1| hydroxyproline-rich cell wall protein [Chlamydomonas reinhardtii]	sp|Q02817|MUC2_HUMAN	62.4	2e-09	Mucin-2 OS=Homo sapiens GN=MUC2 PE=1 SV=2	Rv0312	60.1	3e-09	COG0443	Molecular chaperone	--	--	--	--	--	-	-	-
Unigene7612_All	370	40	6	4.4826	0.6331	2.8238	up	5.99e-08	1.27e-06	--	--	--	--	--	--	--	--	--	--	--	--	--	--	--	--	--	--	-	-	-
Unigene15756_All	1019	73	11	2.9704	0.4215	2.8171	up	1.84e-13	7.32e-12	gi|8843739|dbj|BAA97287.1|	79	7e-18	retroelement pol polyprotein-like [Arabidopsis thaliana]	sp|P04146|COPIA_DROME	52.4	2e-07	Copia protein OS=Drosophila melanogaster GN=GIP PE=1 SV=3	--	--	--	--	--	--	--	--	--	--	GO:0008152//metabolic process	GO:0046872//metal ion binding;GO:0003676//nucleic acid binding;GO:0003824//catalytic activity	-
Unigene75036_All	582	53	8	3.7759	0.5367	2.8146	up	4.12e-10	1.17e-08	--	--	--	--	--	--	--	--	--	--	--	--	--	--	--	--	--	--	-	-	-
Unigene40004_All	1273	33	5	1.0749	0.1533	2.8098	up	9.89e-07	1.7e-05	--	--	--	--	--	--	--	--	--	--	--	--	--	--	--	--	--	--	-	-	-
Unigene3485_All	1463	33	5	0.9353	0.1334	2.8097	up	9.89e-07	1.7e-05	gi|42563076|ref|NP_177107.2|	325	8e-88	phosphate transporter PHO1-10 [Arabidopsis thaliana] >gi|75127834|sp|Q6R8G0.1|PHO1A_ARATH RecName: Full=Phosphate transporter PHO1 homolog 10; AltName: Full=Protein PHO1 homolog 10; Short=AtPHO1;H10 >gi|41079301|gb|AAR99492.1| PHO1-like protein [Arabidopsis thaliana] >gi|332196809|gb|AEE34930.1| phosphate transporter PHO1-10 [Arabidopsis thaliana]	sp|Q6R8G0|PHO1A_ARATH	325	4e-88	Phosphate transporter PHO1 homolog 10 OS=Arabidopsis thaliana GN=PHO1-H10 PE=2 SV=1	--	--	--	--	--	--	--	--	--	--	-	-	GO:0016020//membrane
Unigene38697_All	453	33	5	3.0205	0.4309	2.8094	up	9.89e-07	1.7e-05	--	--	--	--	--	--	--	--	--	--	--	--	--	--	--	--	--	--	-	-	-
Unigene85722_All	286	33	5	4.7843	0.6825	2.8094	up	9.89e-07	1.7e-05	--	--	--	--	--	--	--	--	--	--	--	--	--	--	--	--	--	--	-	-	-
Unigene80591_All	370	33	5	3.6981	0.5276	2.8093	up	9.89e-07	1.7e-05	--	--	--	--	--	--	--	--	--	--	--	--	--	--	--	--	--	--	-	-	-
Unigene61661_All	680	46	7	2.8049	0.4019	2.803	up	6.65e-09	1.63e-07	gi|301093682|ref|XP_002997686.1|	303	2e-81	60S ribosomal protein L3 [Phytophthora infestans T30-4] >gi|262109935|gb|EEY67987.1| 60S ribosomal protein L3 [Phytophthora infestans T30-4]	sp|P59671|RL3_NEUCR	411	2e-114	60S ribosomal protein L3 OS=Neurospora crassa GN=rpl-3 PE=3 SV=1	YOR063w	347	1e-95	COG0087	Ribosomal protein L3	K02925	8e-82	300	cre:CHLREDRAFT_126189	large subunit ribosomal protein L3e	-	-	GO:0030529//ribonucleoprotein complex
Unigene52358_All	383	26	4	2.8148	0.4077	2.7875	up	1.66e-05	0.00022	--	--	--	--	--	--	--	--	--	--	--	--	--	--	--	--	--	--	-	-	-
Unigene82823_All	377	26	4	2.8596	0.4142	2.7874	up	1.66e-05	0.00022	--	--	--	--	--	--	--	--	--	--	--	--	--	--	--	--	--	--	-	-	-
Unigene22673_All	476	39	6	3.3972	0.4921	2.7873	up	1.08e-07	2.21e-06	gi|302829855|ref|XP_002946494.1|	154	3e-37	component of cytosolic 80S ribosome and 60S large subunit [Volvox carteri f. nagariensis] >gi|300268240|gb|EFJ52421.1| component of cytosolic 80S ribosome and 60S large subunit [Volvox carteri f. nagariensis]	sp|Q7RXY1|RL32_NEUCR	204	1e-52	60S ribosomal protein L32 OS=Neurospora crassa GN=rpl-32 PE=3 SV=1	SPAC3H5.10	170	1e-42	COG1717	Ribosomal protein L32E	K02912	2e-37	151	cre:CHLREDRAFT_191758	large subunit ribosomal protein L32e	-	-	GO:0005622//intracellular
Unigene47480_All	529	39	6	3.0569	0.4428	2.7873	up	1.08e-07	2.21e-06	--	--	--	--	--	--	--	--	--	--	--	--	--	--	--	--	--	--	-	-	-
Unigene75942_All	764	39	6	2.1166	0.3066	2.7873	up	1.08e-07	2.21e-06	gi|115453823|ref|NP_001050512.1|	80.9	2e-14	Os03g0568800 [Oryza sativa Japonica Group] >gi|113548983|dbj|BAF12426.1| Os03g0568800 [Oryza sativa Japonica Group]	sp|Q8TAX7|MUC7_HUMAN	97.4	9e-20	Mucin-7 OS=Homo sapiens GN=MUC7 PE=1 SV=2	YPO2725	65.5	9e-11	COG3501	Uncharacterized protein conserved in bacteria	--	--	--	--	--	-	-	-
Unigene85615_All	241	26	4	4.4733	0.648	2.7873	up	1.66e-05	0.00022	gi|145353601|ref|XP_001421096.1|	99.4	1e-20	Receptor of activated protein kinase C 1A, component of 40S small ribosomal subunit [Ostreococcus lucimarinus CCE9901] >gi|145357301|ref|XP_001422858.1| Receptor of activated protein kinase C 1B, component of 40S small ribosomal subunit [Ostreococcus lucimarinus CCE9901] >gi|144581332|gb|ABO99389.1| Receptor of activated protein kinase C 1A, component of 40S small ribosomal subunit [Ostreococcus …	sp|Q01369|GBLP_NEUCR	127	2e-29	Guanine nucleotide-binding protein subunit beta-like protein OS=Neurospora crassa GN=cpc-2 PE=3 SV=1	--	--	--	--	--	--	--	--	--	--	GO:0010468//regulation of gene expression	GO:0004871//signal transducer activity;GO:0003676//nucleic acid binding;GO:0016772//transferase activity, transferring phosphorus-containing groups	GO:0043231//intracellular membrane-bounded organelle
Unigene22571_All	370	26	4	2.9137	0.4221	2.7872	up	1.66e-05	0.00022	gi|299473100|emb|CBN77493.1|	163	7e-40	Inositol-3-phosphate synthase [Ectocarpus siliculosus]	sp|P42800|INO1_CANAL	169	6e-42	Inositol-3-phosphate synthase OS=Candida albicans GN=INO1 PE=1 SV=1	YJL153c	162	2e-40	COG1260	Myo-inositol-1-phosphate synthase	K01858	3e-38	153	osa:4348467	myo-inositol-1-phosphate synthase [EC:5.5.1.4]	GO:0006644//phospholipid metabolic process;GO:0006020//inositol metabolic process	GO:0016872//intramolecular lyase activity	GO:0044424//intracellular part
Unigene48289_All	398	26	4	2.7087	0.3924	2.7872	up	1.66e-05	0.00022	--	--	--	--	--	--	--	--	--	--	--	--	--	--	--	--	--	--	-	-	-
Unigene52291_All	631	26	4	1.7085	0.2475	2.7872	up	1.66e-05	0.00022	--	--	--	--	--	--	--	--	--	--	--	--	--	--	--	--	--	--	-	-	-
Unigene5427_All	647	26	4	1.6662	0.2414	2.7871	up	1.66e-05	0.00022	--	--	--	--	--	--	--	--	--	--	--	--	--	--	--	--	--	--	-	-	-
Unigene77278_All	464	26	4	2.3234	0.3366	2.7871	up	1.66e-05	0.00022	gi|296084743|emb|CBI25887.3|	62	3e-09	unnamed protein product [Vitis vinifera]	--	--	--	--	--	--	--	--	--	--	--	--	--	--	-	-	-
Unigene8362_All	692	26	4	1.5579	0.2257	2.7871	up	1.66e-05	0.00022	gi|5690095|emb|CAB51950.1|	70.9	8e-14	transposase related protein [Zea mays]	--	--	--	--	--	--	--	--	--	--	--	--	--	--	-	GO:0005488//binding	-
Unigene20651_All	469	45	7	3.9784	0.5827	2.7714	up	1.2e-08	2.83e-07	--	--	--	--	--	--	--	--	--	--	--	--	--	--	--	--	--	--	-	-	-
Unigene82259_All	504	45	7	3.7021	0.5422	2.7714	up	1.2e-08	2.83e-07	--	--	--	--	--	--	--	--	--	--	--	--	--	--	--	--	--	--	-	-	-
Unigene73845_All	274	45	7	6.8097	0.9974	2.7713	up	1.2e-08	2.83e-07	--	--	--	--	--	--	--	--	--	--	--	--	--	--	--	--	--	--	-	-	-
Unigene80552_All	472	45	7	3.9531	0.579	2.7713	up	1.2e-08	2.83e-07	--	--	--	--	--	--	--	--	--	--	--	--	--	--	--	--	--	--	-	-	-
Unigene58390_All	679	141	22	8.6103	1.265	2.7669	up	2.72e-24	2.09e-22	gi|145344436|ref|XP_001416738.1|	259	2e-68	Peptidyl-prolyl cis-trans isomerase, cyclophilin-type [Ostreococcus lucimarinus CCE9901] >gi|144576964|gb|ABO95031.1| Peptidyl-prolyl cis-trans isomerase, cyclophilin-type [Ostreococcus lucimarinus CCE9901]	sp|P91791|PPIA_HEMPU	266	1e-70	Peptidyl-prolyl cis-trans isomerase OS=Hemicentrotus pulcherrimus PE=2 SV=1	SPBC28F2.03	243	2e-64	COG0652	Peptidyl-prolyl cis-trans isomerase (rotamase) - cyclophilin family	K03767	2e-69	259	olu:OSTLU_34076	peptidyl-prolyl cis-trans isomerase A (cyclophilin A) [EC:5.2.1.8]	-	-	-
Unigene22829_All	518	64	10	5.1229	0.7537	2.7649	up	9.42e-12	3.19e-10	gi|326529079|dbj|BAK00933.1|	237	5e-62	predicted protein [Hordeum vulgare subsp. vulgare]	sp|Q10327|YD72_SCHPO	118	2e-26	Uncharacterized protein C32A11.02c OS=Schizosaccharomyces pombe (strain ATCC 38366 / 972) GN=SPAC32A11.02c PE=2 SV=1	--	--	--	--	--	--	--	--	--	--	-	-	-
Unigene27131_All	272	32	5	4.8781	0.7177	2.7649	up	1.78e-06	2.91e-05	--	--	--	--	--	--	--	--	--	--	--	--	--	--	--	--	--	--	-	-	-
Unigene48934_All	564	288	45	21.1729	3.115	2.7649	up	5.16e-48	9.1e-46	--	--	--	--	--	--	--	--	--	--	--	--	--	--	--	--	--	--	-	-	-
Unigene60092_All	669	64	10	3.9666	0.5836	2.7649	up	9.42e-12	3.19e-10	--	--	--	--	--	--	--	--	--	--	--	--	--	--	--	--	--	--	-	-	-
Unigene79715_All	418	83	13	8.2332	1.2142	2.7614	up	7.75e-15	3.46e-13	gi|226504536|ref|NP_001151612.1|	196	1e-49	40S ribosomal protein S18 [Zea mays] >gi|195605976|gb|ACG24818.1| 40S ribosomal protein S18 [Zea mays] >gi|195618188|gb|ACG30924.1| 40S ribosomal protein S18 [Zea mays] >gi|195620216|gb|ACG31938.1| 40S ribosomal protein S18 [Zea mays] >gi|195648096|gb|ACG43516.1| 40S ribosomal protein S18 [Zea mays]	sp|P35271|RS18_YEAST	205	6e-53	40S ribosomal protein S18 OS=Saccharomyces cerevisiae (strain ATCC 204508 / S288c) GN=RPS18A PE=1 SV=4	YML026c	205	2e-53	COG0099	Ribosomal protein S13	K02964	8e-51	196	zma:100285246	small subunit ribosomal protein S18e	GO:0006412//translation	GO:0003676//nucleic acid binding;GO:0005198//structural molecule activity	GO:0015935//small ribosomal subunit;GO:0016020//membrane;GO:0030312//external encapsulating structure;GO:0031981//nuclear lumen
Unigene49915_All	391	51	8	5.4083	0.7988	2.7593	up	1.33e-09	3.56e-08	--	--	--	--	--	--	--	--	--	--	--	--	--	--	--	--	--	--	-	-	-
Unigene37921_All	562	51	8	3.7627	0.5558	2.7591	up	1.33e-09	3.56e-08	gi|297820548|ref|XP_002878157.1|	275	2e-73	40S ribosomal protein S2 [Arabidopsis lyrata subsp. lyrata] >gi|297323995|gb|EFH54416.1| 40S ribosomal protein S2 [Arabidopsis lyrata subsp. lyrata]	sp|O74892|RS2_SCHPO	299	7e-81	40S ribosomal protein S2 OS=Schizosaccharomyces pombe (strain ATCC 38366 / 972) GN=rps2 PE=2 SV=1	SPCC576.08c	299	2e-81	COG0098	Ribosomal protein S5	K02981	8e-76	280	zma:100382980	small subunit ribosomal protein S2e	-	-	-
Unigene49658_All	590	38	6	2.6705	0.397	2.7499	up	1.95e-07	3.81e-06	gi|115464513|ref|NP_001055856.1|	53.1	2e-06	Os05g0480600 [Oryza sativa Japonica Group] >gi|113579407|dbj|BAF17770.1| Os05g0480600 [Oryza sativa Japonica Group]	--	--	--	--	--	--	--	--	--	--	--	--	--	--	-	-	-
Unigene47791_All	824	38	6	1.9122	0.2843	2.7497	up	1.95e-07	3.81e-06	gi|29467228|dbj|BAC67060.1|	110	2e-23	DNA methyltransferase [Nicotiana tabacum]	sp|Q9M548|DRM2_ARATH	90.5	1e-17	DNA (cytosine-5)-methyltransferase DRM2 OS=Arabidopsis thaliana GN=DRM2 PE=1 SV=1	--	--	--	--	--	--	--	--	--	--	GO:0034968;GO:0006305	GO:0016740//transferase activity	-
Unigene76268_All	596	44	7	3.0611	0.4585	2.7391	up	2.15e-08	4.88e-07	gi|124359343|gb|ABD28505.2|	53.5	2e-10	RNA-directed DNA polymerase (Reverse transcriptase); Polynucleotidyl transferase, Ribonuclease H fold [Medicago truncatula]	--	--	--	--	--	--	--	--	--	--	--	--	--	--	-	-	-
Unigene52966_All	548	119	19	9.004	1.3536	2.7338	up	1.79e-20	1.14e-18	gi|6730635|gb|AAF27056.1|AC008262_5	58.2	6e-08	F4N2.10 [Arabidopsis thaliana]	sp|P81225|CU21_LOCMI	123	6e-28	Cuticle protein 21 OS=Locusta migratoria GN=ACP21 PE=1 SV=1	--	--	--	--	--	K13210	2e-06	49.3	ath:AT1G33680	far upstream element-binding protein	-	-	-
Unigene22482_All	357	25	4	2.9036	0.4374	2.7308	up	3e-05	0.000371	gi|115454883|ref|NP_001051042.1|	61.6	3e-09	Os03g0709000 [Oryza sativa Japonica Group] >gi|108710695|gb|ABF98490.1| MAPEG family protein, expressed [Oryza sativa Japonica Group] >gi|113549513|dbj|BAF12956.1| Os03g0709000 [Oryza sativa Japonica Group]	sp|P08640|MUC1_YEAST	57.8	2e-08	Flocculation protein FLO11 OS=Saccharomyces cerevisiae (strain ATCC 204508 / S288c) GN=MUC1 PE=1 SV=2	--	--	--	--	--	K00799	2e-10	61.6	osa:4333870	glutathione S-transferase [EC:2.5.1.18]	-	-	-
Unigene75838_All	273	25	4	3.797	0.572	2.7308	up	3e-05	0.00037	gi|117958|sp|P29380.1|CYC1_ARATH	139	1e-32	RecName: Full=Cytochrome c >gi|16177|emb|CAA42069.1| Cytochrome c [Arabidopsis thaliana] >gi|166621|gb|AAA32747.1| cytochrome c [Arabidopsis thaliana]	sp|Q4HVX7|CYC_GIBZE	147	2e-35	Cytochrome c OS=Gibberella zeae (strain PH-1 / FGSC 9075 / NRRL 31084) GN=CYC1 PE=3 SV=1	SPCC191.07	137	4e-33	COG3474	Cytochrome c2	K08738	1e-27	118	cme:CMJ212C	cytochrome c	GO:0051234//establishment of localization;GO:0006091//generation of precursor metabolites and energy	GO:0005506//iron ion binding	GO:0044425//membrane part
Unigene19256_All	1080	175	28	6.7187	1.0122	2.7307	up	2.13e-29	2.04e-27	gi|302833627|ref|XP_002948377.1|	47.4	1e-10	metalloproteinase, extracellular matrix glycoprotein VMP3 [Volvox carteri f. nagariensis] >gi|300266597|gb|EFJ50784.1| metalloproteinase, extracellular matrix glycoprotein VMP3 [Volvox carteri f. nagariensis]	sp|Q02817|MUC2_HUMAN	72.8	4e-12	Mucin-2 OS=Homo sapiens GN=MUC2 PE=1 SV=2	PA2462	56.2	9e-08	COG3210	Large exoproteins involved in heme utilization or adhesion	--	--	--	--	--	-	-	-
Unigene51952_All	285	50	8	7.2743	1.0959	2.7307	up	2.39e-09	6.19e-08	--	--	--	--	--	--	--	--	--	--	--	--	--	--	--	--	--	--	-	-	-
Unigene60680_All	940	150	24	6.6165	0.9968	2.7307	up	2.08e-25	1.69e-23	--	--	--	--	sp|A6ZL22|ECM33_YEAS7	94.7	8e-19	Cell wall protein ECM33 OS=Saccharomyces cerevisiae (strain YJM789) GN=ECM33 PE=3 SV=2	--	--	--	--	--	--	--	--	--	--	-	-	-
Unigene6271_All	718	50	8	2.8874	0.435	2.7307	up	2.39e-09	6.18e-08	gi|145344757|ref|XP_001416891.1|	293	1e-78	Ribosomal protein L7, component of cytosolic 80S ribosome and 60S large subunit [Ostreococcus lucimarinus CCE9901] >gi|144577117|gb|ABO95184.1| Ribosomal protein L7, component of cytosolic 80S ribosome and 60S large subunit [Ostreococcus lucimarinus CCE9901]	sp|Q7SBD5|RL7_NEUCR	424	2e-118	60S ribosomal protein L7 OS=Neurospora crassa GN=rpl-7 PE=3 SV=2	SPBC18H10.12c	322	5e-88	COG1841	Ribosomal protein L30/L7E	K02937	9e-80	293	olu:OSTLU_30488	large subunit ribosomal protein L7e	GO:0010467//gene expression	GO:0005488//binding;GO:0005198//structural molecule activity	GO:0015934//large ribosomal subunit;GO:0016020//membrane;GO:0030312//external encapsulating structure;GO:0009536//plastid
Unigene11057_All	315	25	4	3.2908	0.4958	2.7306	up	3e-05	0.000371	--	--	--	--	--	--	--	--	--	--	--	--	--	--	--	--	--	--	-	-	-
Unigene81794_All	344	25	4	3.0133	0.454	2.7306	up	3e-05	0.00037	--	--	--	--	--	--	--	--	--	--	--	--	--	--	--	--	--	--	-	-	-
Unigene82861_All	388	25	4	2.6716	0.4025	2.7306	up	3e-05	0.00037	--	--	--	--	--	--	--	--	--	--	--	--	--	--	--	--	--	--	-	-	-
Unigene20351_All	517	25	4	2.005	0.3021	2.7305	up	3e-05	0.000371	--	--	--	--	--	--	--	--	--	--	--	--	--	--	--	--	--	--	-	-	-
Unigene36110_All	528	25	4	1.9632	0.2958	2.7305	up	3e-05	0.000371	gi|9369395|gb|AAF87143.1|AC002423_8	58.2	2e-16	T23E23.16 [Arabidopsis thaliana]	sp|P0C2F6|RNHX1_ARATH	47.4	1e-10	Putative ribonuclease H protein At1g65750 OS=Arabidopsis thaliana GN=At1g65750 PE=3 SV=1	--	--	--	--	--	K13148	8e-09	57.4	vvi:100261060	integrator complex subunit 11 [EC:3.1.27.-]	-	-	-
Unigene51804_All	623	25	4	1.6639	0.2507	2.7305	up	3e-05	0.00037	--	--	--	--	--	--	--	--	--	--	--	--	--	--	--	--	--	--	-	-	-
Unigene87384_All	348	25	4	2.9787	0.4488	2.7305	up	3e-05	0.00037	gi|223046127|gb|ACM79256.1|	91.7	3e-18	cytokinin oxidase/dehydrogenase [Gossypium hirsutum] >gi|251826367|gb|ACT21088.1| cytokinin oxidase/dehydrogenase [Gossypium hirsutum]	sp|Q9FUJ3|CKX2_ARATH	87.4	2e-17	Cytokinin dehydrogenase 2 OS=Arabidopsis thaliana GN=CKX2 PE=1 SV=2	--	--	--	--	--	--	--	--	--	--	-	-	-
Unigene70893_All	884	25	4	1.1726	0.1767	2.7303	up	3e-05	0.00037	--	--	--	--	--	--	--	--	--	--	--	--	--	--	--	--	--	--	-	-	-
Unigene79865_All	308	31	5	4.1733	0.6338	2.7191	up	3.21e-06	4.97e-05	--	--	--	--	--	--	--	--	--	--	--	--	--	--	--	--	--	--	-	-	-
Unigene85646_All	333	31	5	3.86	0.5862	2.7191	up	3.21e-06	4.97e-05	gi|333411341|gb|AEF32535.1|	71.6	3e-12	sesquiterpene synthase [Santalum austrocaledonicum]	sp|O23945|PINS_FRAVE	51.6	2e-06	Pinene synthase OS=Fragaria vesca PE=1 SV=2	--	--	--	--	--	--	--	--	--	--	GO:0008152//metabolic process	GO:0046872//metal ion binding;GO:0003824//catalytic activity	-
Unigene77943_All	628	37	6	2.4429	0.373	2.7113	up	3.49e-07	6.53e-06	--	--	--	--	--	--	--	--	--	--	--	--	--	--	--	--	--	--	-	-	-
Unigene87705_All	516	37	6	2.9732	0.454	2.7113	up	3.49e-07	6.53e-06	gi|186478451|ref|NP_172824.3|	199	1e-50	phospholipase C/ phosphoric diester hydrolase [Arabidopsis thaliana] >gi|8920573|gb|AAF81295.1|AC027656_12 Contains similarity to MAP3K-like protein kinase from Arabidopsis thaliana gb|Z99707 >gi|332190936|gb|AEE29057.1| phospholipase C/ phosphoric diester hydrolase [Arabidopsis thaliana]	sp|Q93XX5|Y5713_ARATH	155	2e-37	PI-PLC X domain-containing protein At5g67130 OS=Arabidopsis thaliana GN=At5g67130 PE=1 SV=1	--	--	--	--	--	--	--	--	--	--	-	-	-
Unigene66475_All	541	43	7	3.2956	0.5052	2.7056	up	3.85e-08	8.4e-07	--	--	--	--	--	--	--	--	--	--	--	--	--	--	--	--	--	--	-	-	-
Unigene6744_All	648	98	16	6.2707	0.964	2.7015	up	6.62e-17	3.44e-15	gi|301121814|ref|XP_002908634.1|	221	6e-57	40S ribosomal protein S8-2 [Phytophthora infestans T30-4] >gi|262103665|gb|EEY61717.1| 40S ribosomal protein S8-2 [Phytophthora infestans T30-4]	sp|P05754|RS8_YEAST	278	2e-74	40S ribosomal protein S8 OS=Saccharomyces cerevisiae (strain ATCC 204508 / S288c) GN=RPS8A PE=1 SV=3	YER102w	278	4e-75	COG2007	Ribosomal protein S8E	K02995	5e-59	224	ppp:PHYPADRAFT_208398	small subunit ribosomal protein S8e	-	-	GO:0030529//ribonucleoprotein complex
Unigene37147_All	651	159	26	10.1271	1.5593	2.6993	up	1.58e-26	1.35e-24	--	--	--	--	--	--	--	--	--	--	--	--	--	--	--	--	--	--	-	-	-
Unigene75178_All	404	115	19	11.8028	1.8361	2.6844	up	1.79e-19	1.08e-17	--	--	--	--	--	--	--	--	--	--	--	--	--	--	--	--	--	--	-	-	-
Unigene20302_All	735	42	7	2.3694	0.3718	2.6719	up	6.87e-08	1.44e-06	gi|299470892|emb|CBN78841.1|	87.4	2e-16	2,3-dihydro-2,3-dihydroxybenzoate dehydrogenase [Ectocarpus siliculosus]	sp|P50166|ARDH_CANTR	122	2e-27	D-arabinitol 2-dehydrogenase [ribulose-forming] OS=Candida tropicalis GN=ARD PE=1 SV=1	TM0297	134	2e-31	COG1028	Dehydrogenases with different specificities (related to short-chain alcohol dehydrogenases)	K08081	5e-15	79	osa:4332375	tropine dehydrogenase [EC:1.1.1.206]	-	-	-
Unigene76157_All	497	48	8	4.0045	0.6284	2.6719	up	7.63e-09	1.85e-07	--	--	--	--	--	--	--	--	--	--	--	--	--	--	--	--	--	--	-	-	-
Unigene22633_All	490	24	4	2.0309	0.3187	2.6718	up	5.39e-05	0.000619	--	--	--	--	--	--	--	--	--	--	--	--	--	--	--	--	--	--	-	-	-
Unigene23913_All	426	36	6	3.504	0.5499	2.6718	up	6.25e-07	1.11e-05	--	--	--	--	--	--	--	--	--	--	--	--	--	--	--	--	--	--	-	-	-
Unigene26191_All	303	24	4	3.2843	0.5154	2.6718	up	5.39e-05	0.000619	gi|117606933|gb|ABK42021.1|	61.6	3e-09	vegetative cell wall protein [Chlamydomonas incerta]	sp|Q9P602|ATPO_NEUCR	94.4	2e-19	ATP synthase subunit 5, mitochondrial OS=Neurospora crassa GN=atp-5 PE=3 SV=2	YDR298c	59.3	2e-09	COG0712	F0F1-type ATP synthase, delta subunit (mitochondrial oligomycin sensitivity protein)	K02137	2e-16	81.3	zma:100191583	F-type H+-transporting ATPase oligomycin sensitivity conferral protein [EC:3.6.3.14]	-	-	-
Unigene33205_All	841	24	4	1.1833	0.1857	2.6718	up	5.39e-05	0.000619	gi|89887334|gb|ABD78322.1|	53.5	3e-06	polyprotein [Primula vulgaris]	--	--	--	--	--	--	--	--	--	--	--	--	--	--	GO:0006259//DNA metabolic process	GO:0003676//nucleic acid binding;GO:0003824//catalytic activity	-
Unigene52305_All	550	42	7	3.1663	0.4969	2.6718	up	6.87e-08	1.44e-06	gi|301093676|ref|XP_002997683.1|	231	3e-60	aconitate hydratase, mitochondrial precursor [Phytophthora infestans T30-4] >gi|262109932|gb|EEY67984.1| aconitate hydratase, mitochondrial precursor [Phytophthora infestans T30-4]	sp|P19414|ACON_YEAST	240	4e-63	Aconitate hydratase, mitochondrial OS=Saccharomyces cerevisiae (strain ATCC 204508 / S288c) GN=ACO1 PE=1 SV=2	YLR304c	240	9e-64	COG1048	Aconitase A	K01681	4e-60	228	cre:CHLREDRAFT_129025	aconitate hydratase 1 [EC:4.2.1.3]	GO:0044237//cellular metabolic process	GO:0046872//metal ion binding;GO:0051536//iron-sulfur cluster binding;GO:0016616//oxidoreductase activity, acting on the CH-OH group of donors, NAD or NADP as acceptor;GO:0016829//lyase activity	GO:0043231//intracellular membrane-bounded organelle
Unigene63941_All	340	24	4	2.9268	0.4593	2.6718	up	5.39e-05	0.000619	gi|253759874|ref|XP_002488951.1|	92	2e-18	hypothetical protein SORBIDRAFT_1292s002010 [Sorghum bicolor] >gi|241947058|gb|EES20203.1| hypothetical protein SORBIDRAFT_1292s002010 [Sorghum bicolor]	--	--	--	--	--	--	--	--	--	--	--	--	--	--	-	-	-
Unigene80543_All	577	30	5	2.1558	0.3383	2.6718	up	5.75e-06	8.42e-05	gi|326508076|dbj|BAJ86781.1|	62.4	4e-09	predicted protein [Hordeum vulgare subsp. vulgare]	sp|A8CG34|P121C_HUMAN	53.5	9e-07	Nuclear envelope pore membrane protein POM 121C OS=Homo sapiens GN=POM121C PE=1 SV=2	--	--	--	--	--	--	--	--	--	--	-	-	-
Unigene89732_All	353	24	4	2.8191	0.4424	2.6718	up	5.39e-05	0.000619	gi|5915815|sp|Q42716.1|C71A8_MENPI	96.7	8e-20	RecName: Full=Cytochrome P450 71A8 >gi|493475|emb|CAA83941.1| cytochrome P-450 oxidase [Mentha x piperita]	sp|Q42716|C71A8_MENPI	96.7	4e-20	Cytochrome P450 71A8 OS=Mentha piperita GN=CYP71A8 PE=3 SV=1	--	--	--	--	--	K11868	2e-16	81.3	ath:AT2G30770	cytochrome P450, family 71, subfamily A, polypeptide 13 (indoleacetaldoxime dehydratase) [EC:4.99.1.6]	GO:0008152//metabolic process	GO:0016709//oxidoreductase activity, acting on paired donors, with incorporation or reduction of molecular oxygen, NADH or NADPH as one donor, and incorporation of one atom of oxygen;GO:0005506//iron ion binding	GO:0016020//membrane
Unigene51987_All	276	30	5	4.5069	0.7073	2.6717	up	5.75e-06	8.42e-05	--	--	--	--	--	--	--	--	--	--	--	--	--	--	--	--	--	--	-	-	-
Unigene55546_All	1936	24	4	0.514	0.0807	2.6711	up	5.39e-05	0.000619	gi|225429055|ref|XP_002266462.1|	83.2	5e-28	PREDICTED: similar to Os02g0583300 [Vitis vinifera]	--	--	--	--	--	--	--	--	--	--	--	--	--	--	-	-	-
Unigene46938_All	313	53	9	7.021	1.1226	2.6448	up	1.52e-09	4.01e-08	--	--	--	--	--	--	--	--	--	--	--	--	--	--	--	--	--	--	-	-	-
Unigene52636_All	738	88	15	4.9442	0.7935	2.6394	up	5.73e-15	2.58e-13	--	--	--	--	--	--	--	--	--	--	--	--	--	--	--	--	--	--	-	-	-
Unigene23013_All	506	41	7	3.3597	0.5401	2.637	up	1.22e-07	2.47e-06	--	--	--	--	--	--	--	--	--	--	--	--	--	--	--	--	--	--	-	-	-
Unigene26266_All	567	35	6	2.5595	0.4131	2.6313	up	1.11e-06	1.89e-05	gi|226528409|ref|NP_001147361.1|	246	2e-64	60S ribosomal protein L5-2 [Zea mays] >gi|195610506|gb|ACG27083.1| 60S ribosomal protein L5-2 [Zea mays]	sp|O59953|RL5_NEUCR	327	2e-89	60S ribosomal protein L5 OS=Neurospora crassa GN=rpl-5 PE=3 SV=1	YPL131w	264	6e-71	COG0256	Ribosomal protein L18	K02932	1e-65	246	zma:100280969	large subunit ribosomal protein L5e	GO:0010467//gene expression	GO:0019843//rRNA binding;GO:0005198//structural molecule activity	GO:0030529//ribonucleoprotein complex
Unigene45930_All	624	29	5	1.927	0.3128	2.623	up	1.03e-05	0.000142	--	--	--	--	--	--	--	--	--	--	--	--	--	--	--	--	--	--	-	-	-
Unigene12305_All	353	29	5	3.4064	0.553	2.6229	up	1.03e-05	0.000142	gi|15230209|ref|NP_188511.1|	53.5	8e-07	protein kinase family protein [Arabidopsis thaliana] >gi|332642630|gb|AEE76151.1| protein kinase family protein [Arabidopsis thaliana]	sp|P18899|DDR48_YEAST	79	9e-15	Stress protein DDR48 OS=Saccharomyces cerevisiae (strain ATCC 204508 / S288c) GN=DDR48 PE=1 SV=4	--	--	--	--	--	--	--	--	--	--	-	GO:0004672//protein kinase activity	-
Unigene48473_All	576	203	35	14.6131	2.3723	2.6229	up	1.85e-32	1.99e-30	gi|73919917|sp|Q5DWI3.3|H3_MARPO	263	1e-69	RecName: Full=Histone H3 >gi|60543034|dbj|BAD90766.1| histone 3 [Conocephalum supradecompositum] >gi|60543038|dbj|BAD90768.1| histone 3 [Conocephalum supradecompositum] >gi|60543044|dbj|BAD90771.1| histone 3 [Conocephalum supradecompositum] >gi|60543054|dbj|BAD90776.1| histone 3 [Conocephalum supradecompositum] >gi|60543072|dbj|BAD90785.1| histone 3 [Conocephalum conicum] >gi|60543088|dbj|BAD9079…	sp|P61835|H3_TRIRE	263	7e-70	Histone H3 OS=Trichoderma reesei GN=HHT1 PE=3 SV=2	YNL031c	250	1e-66	COG2036	Histones H3 and H4	K11253	3e-64	241	cme:CMN176C	histone H3	-	-	-
Unigene36064_All	409	29	5	2.94	0.4773	2.6228	up	1.03e-05	0.000142	--	--	--	--	--	--	--	--	--	--	--	--	--	--	--	--	--	--	-	-	-
Unigene59937_All	316	80	14	10.4971	1.7297	2.6014	up	1.56e-13	6.26e-12	--	--	--	--	--	--	--	--	--	--	--	--	--	--	--	--	--	--	-	-	-
Unigene49144_All	438	57	10	5.396	0.8914	2.5977	up	5.34e-10	1.5e-08	gi|21992|emb|CAA46283.1|	52.4	2e-06	extensin [Volvox carteri]	sp|Q9UTI9|YKZ2_SCHPO	80.5	3e-15	UPF0591 membrane protein C15E1.02c OS=Schizosaccharomyces pombe (strain ATCC 38366 / 972) GN=SPAC15E1.02c PE=2 SV=1	--	--	--	--	--	--	--	--	--	--	-	-	-
Unigene28389_All	1130	34	6	1.2476	0.2073	2.5894	up	1.98e-06	3.2e-05	gi|10177643|dbj|BAB10790.1|	382	1e-105	retroelement pol polyprotein-like [Arabidopsis thaliana]	sp|Q2F7J3|POL_XMRV3	114	1e-24	Gag-Pol polyprotein OS=Xenotropic MuLV-related virus (isolate VP35) GN=gag-pol PE=3 SV=1	SPAC9.04	61.2	3e-09	COG2801	Transposase and inactivated derivatives	--	--	--	--	--	GO:0006259//DNA metabolic process	GO:0003676//nucleic acid binding	-
Unigene85621_All	382	34	6	3.6905	0.6132	2.5894	up	1.98e-06	3.2e-05	gi|1076186|pir||S53301	67.8	4e-11	H+-exporting ATPase (EC 3.6.3.6) (clone HAA1) - golden alga (Heterosigma akashiwo) (fragment)	sp|P07038|PMA1_NEUCR	246	3e-65	Plasma membrane ATPase OS=Neurospora crassa GN=pma-1 PE=1 SV=1	SPAC1071.10c	211	3e-55	COG0474	Cation transport ATPase	--	--	--	--	--	-	GO:0003824//catalytic activity	-
Unigene57603_All	493	102	18	8.5787	1.4255	2.5893	up	8.39e-17	4.32e-15	--	--	--	--	--	--	--	--	--	--	--	--	--	--	--	--	--	--	-	-	-
Unigene80847_All	625	34	6	2.2556	0.3748	2.5893	up	1.98e-06	3.2e-05	--	--	--	--	--	--	--	--	--	--	--	--	--	--	--	--	--	--	-	-	-
Unigene46196_All	469	79	14	6.9843	1.1654	2.5833	up	2.76e-13	1.07e-11	--	--	--	--	--	--	--	--	--	--	--	--	--	--	--	--	--	--	-	-	-
Unigene86537_All	362	45	8	5.1543	0.8628	2.5787	up	4.26e-08	9.23e-07	--	--	--	--	--	--	--	--	--	--	--	--	--	--	--	--	--	--	-	-	-
Unigene33296_All	458	45	8	4.0739	0.682	2.5786	up	4.26e-08	9.24e-07	--	--	--	--	--	--	--	--	--	--	--	--	--	--	--	--	--	--	-	-	-
Unigene1047_All	967	623	111	26.7134	4.4815	2.5755	up	2.41e-94	8.27e-92	--	--	--	--	--	--	--	--	--	--	--	--	--	--	--	--	--	--	-	-	-
Unigene40378_All	918	28	5	1.2647	0.2126	2.5726	up	1.82e-05	0.000239	gi|15229457|ref|NP_189066.1|	408	1e-113	receptor-like protein kinase 2 [Arabidopsis thaliana] >gi|75335017|sp|Q9LHP4.1|RCH2_ARATH RecName: Full=Receptor-like protein kinase 2; Flags: Precursor >gi|11994762|dbj|BAB03091.1| receptor protein kinase-like protein [Arabidopsis thaliana] >gi|332643357|gb|AEE76878.1| receptor-like protein kinase 2 [Arabidopsis thaliana]	sp|Q9LHP4|RCH2_ARATH	408	2e-113	Receptor-like protein kinase 2 OS=Arabidopsis thaliana GN=RCH2 PE=1 SV=1	lin1934_1	71.6	2e-12	COG0515	Serine/threonine protein kinase	K00924	1e-50	197	ath:AT1G75820	[EC:2.7.1.-]	-	-	-
Unigene81229_All	242	28	5	4.7975	0.8066	2.5724	up	1.82e-05	0.000239	--	--	--	--	--	--	--	--	--	--	--	--	--	--	--	--	--	--	-	-	-
Unigene51671_All	513	28	5	2.2631	0.3805	2.5723	up	1.82e-05	0.000239	--	--	--	--	--	--	--	--	--	--	--	--	--	--	--	--	--	--	-	-	-
Unigene87733_All	354	28	5	3.2796	0.5514	2.5723	up	1.82e-05	0.000239	--	--	--	--	sp|A2QLK4|FKS1_ASPNC	153	4e-37	1,3-beta-glucan synthase component FKS1 OS=Aspergillus niger (strain CBS 513.88 / FGSC A1513) GN=fksA PE=3 SV=1	--	--	--	--	--	--	--	--	--	--	-	-	-
Unigene35084_All	572	28	5	2.0297	0.3413	2.5722	up	1.82e-05	0.000239	gi|52839684|dbj|BAD52007.1|	224	5e-58	UDP-glucose: chalcononaringenin 2'-O-glucosyltransferase [Dianthus caryophyllus]	sp|Q9M051|U76F2_ARATH	182	2e-45	UDP-glycosyltransferase 76F2 OS=Arabidopsis thaliana GN=UGT76F2 PE=2 SV=1	--	--	--	--	--	K13228	2e-41	165	zma:100274317	UDP-glucosyltransferase BX9 [EC:2.4.1.202]	-	GO:0016757//transferase activity, transferring glycosyl groups	-
Unigene81463_All	672	28	5	1.7277	0.2905	2.5722	up	1.82e-05	0.000239	gi|195626012|gb|ACG34836.1|	184	9e-46	NADH-cytochrome b5 reductase-like protein [Zea mays]	sp|A4QR21|MCR1_MAGO7	315	1e-85	NADH-cytochrome b5 reductase 2 OS=Magnaporthe oryzae (strain 70-15 / FGSC 8958) GN=MCR1 PE=3 SV=1	YKL150w	188	8e-48	COG0543	2-polyprenylphenol hydroxylase and related flavodoxin oxidoreductases	K00326	1e-46	183	osa:4327126	cytochrome-b5 reductase [EC:1.6.2.2]	GO:0006970//response to osmotic stress	GO:0046914//transition metal ion binding	GO:0005740//mitochondrial envelope;GO:0005618//cell wall
Unigene23263_All	416	28	5	2.7908	0.4693	2.5721	up	1.82e-05	0.000239	--	--	--	--	--	--	--	--	--	--	--	--	--	--	--	--	--	--	-	-	-
Unigene58357_All	368	28	5	3.1548	0.5305	2.5721	up	1.82e-05	0.000239	--	--	--	--	--	--	--	--	--	--	--	--	--	--	--	--	--	--	-	-	-
Unigene43720_All	402	39	7	4.0226	0.6798	2.5649	up	3.84e-07	7.11e-06	gi|195629688|gb|ACG36485.1|	82.4	2e-15	haloacid dehalogenase-like hydrolase domain-containing protein 1A [Zea mays]	sp|Q94529|GS1_DROME	57.4	3e-08	Probable pseudouridine-5'-monophosphatase OS=Drosophila melanogaster GN=Gs1l PE=2 SV=2	--	--	--	--	--	--	--	--	--	--	-	-	-
Unigene82038_All	313	39	7	5.1664	0.8731	2.5649	up	3.84e-07	7.11e-06	--	--	--	--	--	--	--	--	--	--	--	--	--	--	--	--	--	--	-	-	-
Unigene53332_All	300	39	7	5.3903	0.911	2.5648	up	3.84e-07	7.11e-06	--	--	--	--	sp|O74471|COX13_SCHPO	90.1	4e-18	Cytochrome c oxidase subunit 6A, mitochondrial OS=Schizosaccharomyces pombe (strain ATCC 38366 / 972) GN=cox13 PE=2 SV=1	--	--	--	--	--	--	--	--	--	--	-	-	-
Unigene60300_All	562	39	7	2.8774	0.4863	2.5648	up	3.84e-07	7.11e-06	--	--	--	--	--	--	--	--	--	--	--	--	--	--	--	--	--	--	-	-	-
Unigene7157_All	359	39	7	4.5044	0.7613	2.5648	up	3.84e-07	7.11e-06	--	--	--	--	--	--	--	--	--	--	--	--	--	--	--	--	--	--	-	-	-
Unigene18746_All	748	50	9	2.7716	0.4698	2.5606	up	8.39e-09	2.03e-07	--	--	--	--	--	--	--	--	--	--	--	--	--	--	--	--	--	--	-	-	-
Unigene6274_All	602	216	39	14.8773	2.5293	2.5563	up	1.69e-33	1.91e-31	gi|50508930|dbj|BAD31835.1|	58.2	7e-08	putative high-affinity potassium transporter [Oryza sativa Japonica Group] >gi|215694830|dbj|BAG90021.1| unnamed protein product [Oryza sativa Japonica Group]	sp|P32323|AGA1_YEAST	60.1	1e-08	A-agglutinin anchorage subunit OS=Saccharomyces cerevisiae (strain ATCC 204508 / S288c) GN=AGA1 PE=1 SV=1	--	--	--	--	--	--	--	--	--	--	-	-	-
Unigene7554_All	548	127	23	9.6093	1.6386	2.552	up	2.88e-20	1.81e-18	gi|3914998|sp|O04996.3|SODC_SOLCS	184	4e-46	RecName: Full=Superoxide dismutase [Cu-Zn] >gi|1944324|dbj|BAA19674.1| copper/zinc-superoxide dismutase [Solidago canadensis var. scabra]	sp|Q96VL0|SODC_CLAPU	296	5e-80	Superoxide dismutase [Cu-Zn] OS=Claviceps purpurea GN=SOD1 PE=3 SV=3	YJR104c	242	2e-64	COG2032	Cu/Zn superoxide dismutase	K04565	8e-44	173	osa:4344210	Cu/Zn superoxide dismutase [EC:1.15.1.1]	GO:0008152//metabolic process	GO:0003824//catalytic activity	-
Unigene11409_All	705	226	41	13.2919	2.2705	2.5495	up	7.07e-35	8.46e-33	gi|15222338|ref|NP_174951.1|	127	1e-28	60S ribosomal protein L35a-2 [Arabidopsis thaliana] >gi|297816896|ref|XP_002876331.1| 60S ribosomal protein L35a [Arabidopsis lyrata subsp. lyrata] >gi|75173426|sp|Q9FZH0.1|R35A2_ARATH RecName: Full=60S ribosomal protein L35a-2 >gi|21536737|gb|AAM61069.1| ribosomal protein [Arabidopsis thaliana] >gi|30102814|gb|AAP21325.1| At1g41880 [Arabidopsis thaliana] >gi|297322169|gb|EFH52590.1| 60S ribosoma…	sp|Q9USX4|RL33A_SCHPO	164	4e-40	60S ribosomal protein L33-A OS=Schizosaccharomyces pombe (strain ATCC 38366 / 972) GN=rpl33a PE=2 SV=2	SPCP31B10.08c	157	2e-38	COG2451	Ribosomal protein L35AE/L33A	K02917	8e-30	127	ath:AT1G41880	large subunit ribosomal protein L35Ae	GO:0010467//gene expression;GO:0022613	GO:0005198//structural molecule activity	GO:0015934//large ribosomal subunit
Unigene20119_All	651	33	6	2.1018	0.3598	2.5464	up	3.5e-06	5.36e-05	--	--	--	--	--	--	--	--	--	--	--	--	--	--	--	--	--	--	-	-	-
Unigene65085_All	359	44	8	5.0819	0.87	2.5463	up	7.51e-08	1.56e-06	--	--	--	--	--	--	--	--	--	--	--	--	--	--	--	--	--	--	-	-	-
Unigene75686_All	1047	44	8	1.7425	0.2983	2.5463	up	7.51e-08	1.56e-06	gi|15239410|ref|NP_200876.1|	141	1e-32	uncharacterized protein [Arabidopsis thaliana] >gi|332009983|gb|AED97366.1| uncharacterized protein [Arabidopsis thaliana]	--	--	--	--	--	--	--	--	--	--	--	--	--	--	-	GO:0005488//binding	-
Unigene81775_All	489	55	10	4.6636	0.7984	2.5463	up	1.66e-09	4.36e-08	--	--	--	--	--	--	--	--	--	--	--	--	--	--	--	--	--	--	-	-	-
Unigene85443_All	550	33	6	2.4878	0.4259	2.5463	up	3.5e-06	5.36e-05	gi|115448845|ref|NP_001048202.1|	66.2	2e-10	Os02g0762200 [Oryza sativa Japonica Group] >gi|46805898|dbj|BAD17211.1| CCHC-type zinc finger protein-like [Oryza sativa Japonica Group] >gi|113537733|dbj|BAF10116.1| Os02g0762200 [Oryza sativa Japonica Group]	--	--	--	--	--	--	--	--	--	--	--	--	--	--	-	-	-
Unigene23160_All	406	33	6	3.3702	0.577	2.5462	up	3.5e-06	5.36e-05	--	--	--	--	--	--	--	--	--	--	--	--	--	--	--	--	--	--	-	-	-
Unigene75884_All	478	33	6	2.8626	0.4901	2.5462	up	3.5e-06	5.36e-05	--	--	--	--	--	--	--	--	--	--	--	--	--	--	--	--	--	--	-	-	-
Unigene73347_All	647	33	6	2.1148	0.3621	2.5461	up	3.5e-06	5.36e-05	gi|38344995|emb|CAE01601.2|	50.1	1e-10	OSJNBa0008A08.9 [Oryza sativa Japonica Group]	--	--	--	--	--	--	--	--	--	--	--	--	--	--	-	GO:0005488//binding	-
Unigene89326_All	766	71	13	3.8432	0.6626	2.5361	up	7.45e-12	2.55e-10	gi|297728401|ref|NP_001176564.1|	170	2e-41	Os11g0521000 [Oryza sativa Japonica Group] >gi|77551166|gb|ABA93963.1| GDSL-like Lipase/Acylhydrolase family protein, expressed [Oryza sativa Japonica Group] >gi|255680130|dbj|BAH95292.1| Os11g0521000 [Oryza sativa Japonica Group]	sp|Q9LZB2|GDL74_ARATH	167	9e-41	GDSL esterase/lipase At5g03980 OS=Arabidopsis thaliana GN=At5g03980 PE=2 SV=1	--	--	--	--	--	K00514	4e-30	129	rcu:RCOM_1428040	zeta-carotene desaturase [EC:1.14.99.30]	-	-	GO:0031410//cytoplasmic vesicle
Unigene18961_All	1230	191	35	6.4387	1.1109	2.535	up	1.57e-29	1.52e-27	gi|15215690|gb|AAK91391.1|	84.3	3e-15	AT4g30290/F17I23_370 [Arabidopsis thaliana] >gi|23505933|gb|AAN28826.1| At4g30290/F17I23_370 [Arabidopsis thaliana]	sp|Q8J0P4|CRF1_ASPFU	287	1e-76	Probable glycosidase crf1 OS=Neosartorya fumigata (strain ATCC MYA-4609 / Af293 / CBS 101355 / FGSC A1100) GN=crf1 PE=1 SV=2	YGR189c	260	4e-69	COG2273	Beta-glucanase/Beta-glucan synthetase	K08235	4e-16	83.6	ath:AT4G30290	xyloglucan:xyloglucosyl transferase [EC:2.4.1.207]	-	GO:0003824//catalytic activity	-
Unigene9460_All	422	218	40	21.4196	3.7006	2.5331	up	1.84e-33	2.08e-31	--	--	--	--	sp|P22151|GRG1_NEUCR	86.7	4e-17	Glucose-repressible gene protein OS=Neurospora crassa GN=grg-1 PE=2 SV=1	--	--	--	--	--	--	--	--	--	--	-	-	-
Unigene6888_All	737	38	7	2.1379	0.3708	2.5275	up	6.77e-07	1.2e-05	--	--	--	--	--	--	--	--	--	--	--	--	--	--	--	--	--	--	-	-	-
Unigene85634_All	399	38	7	3.9489	0.6849	2.5275	up	6.77e-07	1.2e-05	--	--	--	--	--	--	--	--	--	--	--	--	--	--	--	--	--	--	-	-	-
Unigene48333_All	1014	65	12	2.6579	0.462	2.5243	up	6.55e-11	2.04e-09	gi|8843739|dbj|BAA97287.1|	264	1e-69	retroelement pol polyprotein-like [Arabidopsis thaliana]	sp|P04146|COPIA_DROME	181	7e-45	Copia protein OS=Drosophila melanogaster GN=GIP PE=1 SV=3	--	--	--	--	--	K10760	8e-19	92	vvi:100247527	adenylate isopentenyltransferase (cytokinin synthase)	-	-	-
Unigene19154_All	499	27	5	2.2435	0.3912	2.5198	up	3.23e-05	0.000396	--	--	--	--	--	--	--	--	--	--	--	--	--	--	--	--	--	--	-	-	-
Unigene46183_All	386	27	5	2.9003	0.5057	2.5198	up	3.23e-05	0.000396	--	--	--	--	--	--	--	--	--	--	--	--	--	--	--	--	--	--	-	-	-
Unigene66497_All	644	140	26	9.0138	1.5762	2.5157	up	7.37e-22	5.06e-20	--	--	--	--	--	--	--	--	--	--	--	--	--	--	--	--	--	--	-	-	-
Unigene62172_All	738	43	8	2.4159	0.4232	2.5131	up	1.32e-07	2.65e-06	gi|299469949|emb|CBN76803.1|	197	2e-49	Serine Carboxypeptidase [Ectocarpus siliculosus]	sp|C7YQJ2|CBPYA_NECH7	416	1e-115	Carboxypeptidase Y homolog A OS=Nectria haematococca (strain 77-13-4 / FGSC 9596 / MPVI) GN=CPYA PE=3 SV=1	YMR297w	353	1e-97	COG2939	Carboxypeptidase C (cathepsin A)	--	--	--	--	--	-	-	-
Unigene74770_All	735	59	11	3.3284	0.5843	2.51	up	5.77e-10	1.61e-08	gi|307136482|gb|ADN34283.1|	89.4	4e-17	ATP binding protein [Cucumis melo subsp. melo]	sp|Q8J0P4|CRF1_ASPFU	206	2e-52	Probable glycosidase crf1 OS=Neosartorya fumigata (strain ATCC MYA-4609 / Af293 / CBS 101355 / FGSC A1100) GN=crf1 PE=1 SV=2	YGR189c	167	2e-41	COG2273	Beta-glucanase/Beta-glucan synthetase	K08235	2e-14	76.6	rcu:RCOM_1307350	xyloglucan:xyloglucosyl transferase [EC:2.4.1.207]	-	-	-
Unigene31437_All	891	32	6	1.4892	0.2629	2.502	up	6.16e-06	8.97e-05	gi|15617438|dbj|BAB64937.1|	58.5	1e-07	TdcA1-ORF1-ORF2 [Daucus carota]	--	--	--	--	--	--	--	--	--	--	--	--	--	--	-	-	-
Unigene59427_All	551	32	6	2.4081	0.4251	2.502	up	6.16e-06	8.97e-05	gi|6093871|sp|O65050.1|RL15A_PICMA	270	1e-71	RecName: Full=60S ribosomal protein L15-1 >gi|2982249|gb|AAC32112.1| probable 60S ribosomal protein L15 [Picea mariana]	sp|Q8X034|RL15_NEUCR	311	2e-84	60S ribosomal protein L15 OS=Neurospora crassa GN=rpl-15 PE=3 SV=1	YLR029c	283	2e-76	COG1632	Ribosomal protein L15E	K02877	5e-72	267	ppp:PHYPADRAFT_179263	large subunit ribosomal protein L15e	GO:0010467//gene expression	GO:0005198//structural molecule activity	GO:0015934//large ribosomal subunit;GO:0016020//membrane;GO:0031981//nuclear lumen
Unigene26293_All	370	32	6	3.586	0.6331	2.5019	up	6.16e-06	8.97e-05	--	--	--	--	--	--	--	--	--	--	--	--	--	--	--	--	--	--	-	-	-
Unigene70819_All	523	32	6	2.537	0.4479	2.5019	up	6.16e-06	8.97e-05	--	--	--	--	--	--	--	--	--	--	--	--	--	--	--	--	--	--	-	-	-
Unigene73536_All	488	32	6	2.7189	0.48	2.5019	up	6.16e-06	8.97e-05	--	--	--	--	--	--	--	--	--	--	--	--	--	--	--	--	--	--	-	-	-
Unigene36012_All	683	48	9	2.914	0.5145	2.5018	up	2.59e-08	5.81e-07	gi|317373528|sp|Q9LK03.3|PERK2_ARATH	60.5	2e-08	RecName: Full=Proline-rich receptor-like protein kinase PERK2; AltName: Full=Proline-rich extensin-like receptor kinase 2; Short=AtPERK2; AltName: Full=Somatic embryogenesis receptor kinase-like protein	sp|A1CD22|EGLC_ASPCL	138	3e-32	Probable glucan endo-1,3-beta-glucosidase eglC OS=Aspergillus clavatus (strain ATCC 1007 / CBS 513.65 / DSM 816 / NCTC 3887 / NRRL 1) GN=eglC PE=3 SV=1	--	--	--	--	--	K12825	4e-07	52.4	vvi:100242352	splicing factor 3A subunit 1	-	-	-
Unigene78518_All	335	32	6	3.9607	0.6993	2.5018	up	6.16e-06	8.97e-05	--	--	--	--	--	--	--	--	--	--	--	--	--	--	--	--	--	--	-	-	-
Unigene60004_All	848	53	10	2.5915	0.4604	2.4928	up	5.1e-09	1.27e-07	--	--	--	--	--	--	--	--	--	--	--	--	--	--	--	--	--	--	-	-	-
Unigene11171_All	309	37	7	4.9649	0.8844	2.489	up	1.19e-06	2.01e-05	--	--	--	--	--	--	--	--	--	--	--	--	--	--	--	--	--	--	-	-	-
Unigene87461_All	518	37	7	2.9617	0.5276	2.4889	up	1.19e-06	2.01e-05	--	--	--	--	--	--	--	--	--	--	--	--	--	--	--	--	--	--	-	-	-
Unigene19043_All	885	433	82	20.2867	3.6174	2.4875	up	1.44e-63	3.28e-61	gi|159483671|ref|XP_001699884.1|	70.1	4e-11	amino acid transporter [Chlamydomonas reinhardtii] >gi|158281826|gb|EDP07580.1| amino acid transporter [Chlamydomonas reinhardtii]	sp|Q4WLB9|YA090_ASPFU	92	5e-18	Uncharacterized protein AFUA_6G14090 OS=Neosartorya fumigata (strain ATCC MYA-4609 / Af293 / CBS 101355 / FGSC A1100) GN=AFUA_6G14090 PE=1 SV=1	XF1267	75.5	1e-13	COG5297	Cellobiohydrolase A (1,4-beta-cellobiosidase A)	--	--	--	--	--	-	-	GO:0044444//cytoplasmic part
Unigene47513_All	630	58	11	3.8173	0.6817	2.4853	up	1.01e-09	2.73e-08	--	--	--	--	sp|Q9P7K6|SDO1L_SCHPO	63.9	8e-10	SDO1-like protein C21C3.19 OS=Schizosaccharomyces pombe (strain ATCC 38366 / 972) GN=SPBC21C3.19 PE=2 SV=1	--	--	--	--	--	--	--	--	--	--	-	-	-
Unigene88775_All	351	42	8	4.9615	0.8898	2.4792	up	2.31e-07	4.47e-06	--	--	--	--	--	--	--	--	--	--	--	--	--	--	--	--	--	--	-	-	-
Unigene77041_All	274	42	8	6.3557	1.1399	2.4791	up	2.31e-07	4.47e-06	--	--	--	--	--	--	--	--	--	--	--	--	--	--	--	--	--	--	-	-	-
Unigene90670_All	502	42	8	3.4691	0.6222	2.4791	up	2.31e-07	4.47e-06	--	--	--	--	--	--	--	--	--	--	--	--	--	--	--	--	--	--	-	-	-
Unigene25387_All	513	68	13	5.4962	0.9894	2.4738	up	3.98e-11	1.27e-09	--	--	--	--	--	--	--	--	--	--	--	--	--	--	--	--	--	--	-	-	-
Unigene38669_All	905	73	14	3.3446	0.604	2.4692	up	7.94e-12	2.71e-10	gi|6012952|emb|CAB57309.1|	177	1e-43	60S ribosomal protein L6 (YL 16 like) [Cyanophora paradoxa]	sp|P05739|RL6B_YEAST	186	1e-46	60S ribosomal protein L6-B OS=Saccharomyces cerevisiae (strain ATCC 204508 / S288c) GN=RPL6B PE=1 SV=4	YLR448w	186	4e-47	COG2163	Ribosomal protein L14E/L6E/L27E	K02934	3e-44	176	vvi:100257150	large subunit ribosomal protein L6e	-	GO:0005488//binding	GO:0015934//large ribosomal subunit;GO:0016020//membrane;GO:0009536//plastid;GO:0031981//nuclear lumen
Unigene49720_All	773	26	5	1.3946	0.2525	2.4655	up	5.68e-05	0.000649	gi|323454233|gb|EGB10103.1|	52	9e-06	hypothetical protein AURANDRAFT_36761 [Aureococcus anophagefferens]	sp|Q8J1U9|PACC_GIBFU	338	2e-92	pH-response transcription factor pacC/RIM101 OS=Gibberella fujikuroi GN=pacC PE=3 SV=1	--	--	--	--	--	--	--	--	--	--	-	-	-
Unigene61501_All	797	26	5	1.3526	0.2449	2.4655	up	5.68e-05	0.000649	gi|156122742|gb|ABU50328.1|	52	9e-06	diacylglycerol acyltransferase [Helianthus annuus]	--	--	--	--	--	--	--	--	--	--	--	--	--	--	-	-	-
Unigene23023_All	676	52	10	3.1895	0.5775	2.4654	up	8.9e-09	2.14e-07	gi|297603611|ref|NP_001054329.2|	67.4	2e-10	Os04g0686700 [Oryza sativa Japonica Group] >gi|255675906|dbj|BAF16243.2| Os04g0686700 [Oryza sativa Japonica Group]	sp|Q9UQ35|SRRM2_HUMAN	67.8	6e-11	Serine/arginine repetitive matrix protein 2 OS=Homo sapiens GN=SRRM2 PE=1 SV=2	Rv3876	52	9e-07	COG0455	ATPases involved in chromosome partitioning	--	--	--	--	--	-	-	-
Unigene53631_All	1131	26	5	0.9532	0.1726	2.4653	up	5.68e-05	0.000649	gi|297725595|ref|NP_001175161.1|	125	3e-41	Os07g0417700 [Oryza sativa Japonica Group] >gi|255677700|dbj|BAH93889.1| Os07g0417700 [Oryza sativa Japonica Group]	sp|P14381|YTX2_XENLA	61.6	6e-20	Transposon TX1 uncharacterized 149 kDa protein OS=Xenopus laevis PE=4 SV=1	--	--	--	--	--	K13148	4e-27	82.4	vvi:100261060	integrator complex subunit 11 [EC:3.1.27.-]	-	-	-
Unigene63833_All	331	26	5	3.257	0.5898	2.4652	up	5.68e-05	0.000649	--	--	--	--	--	--	--	--	--	--	--	--	--	--	--	--	--	--	-	-	-
Unigene49537_All	461	57	11	5.1267	0.9316	2.4602	up	1.76e-09	4.61e-08	--	--	--	--	--	--	--	--	--	--	--	--	--	--	--	--	--	--	-	-	-
Unigene62899_All	846	88	17	4.313	0.7845	2.4588	up	6.37e-14	2.64e-12	gi|223995745|ref|XP_002287546.1|	257	1e-67	phosphate transport protein [Thalassiosira pseudonana CCMP1335] >gi|220976662|gb|EED94989.1| phosphate transport protein [Thalassiosira pseudonana CCMP1335]	sp|P23641|MPCP_YEAST	285	3e-76	Mitochondrial phosphate carrier protein OS=Saccharomyces cerevisiae (strain ATCC 204508 / S288c) GN=MIR1 PE=1 SV=1	slr0599	49.7	6e-06	COG0515	Serine/threonine protein kinase	--	--	--	--	--	GO:0006810//transport	-	GO:0016020//membrane
Unigene42894_All	546	31	6	2.3542	0.429	2.4562	up	1.08e-05	0.000148	--	--	--	--	--	--	--	--	--	--	--	--	--	--	--	--	--	--	-	-	-
Unigene50756_All	551	31	6	2.3328	0.4251	2.4562	up	1.08e-05	0.000148	gi|115462177|ref|NP_001054688.1|	201	6e-51	Os05g0155100 [Oryza sativa Japonica Group] >gi|54291850|gb|AAV32218.1| cytoplasmic ribosomal protein L18 [Oryza sativa Japonica Group] >gi|113578239|dbj|BAF16602.1| Os05g0155100 [Oryza sativa Japonica Group] >gi|149392184|gb|ABR25945.1| 60S ribosomal protein l18 [Oryza sativa Indica Group]	sp|Q8TFH1|RL18B_SCHPO	233	7e-61	60S ribosomal protein L18-B OS=Schizosaccharomyces pombe (strain ATCC 38366 / 972) GN=rpl18b PE=1 SV=1	SPBC11C11.07	231	4e-61	COG1727	Ribosomal protein L18E	K02883	5e-54	207	ppp:PHYPADRAFT_201150	large subunit ribosomal protein L18e	-	-	GO:0030529//ribonucleoprotein complex
Unigene75608_All	579	31	6	2.22	0.4046	2.456	up	1.08e-05	0.000148	--	--	--	--	--	--	--	--	--	--	--	--	--	--	--	--	--	--	-	-	-
Unigene2108_All	840	31	6	1.5302	0.2789	2.4559	up	1.08e-05	0.000148	gi|145323886|ref|NP_001077532.1|	189	5e-47	CAAX amino terminal motif-containing protease [Arabidopsis thaliana] >gi|186478475|ref|NP_001117285.1| CAAX amino terminal motif-containing protease [Arabidopsis thaliana] >gi|332191015|gb|AEE29136.1| CAAX amino terminal motif-containing protease [Arabidopsis thaliana] >gi|332191016|gb|AEE29137.1| CAAX amino terminal motif-containing protease [Arabidopsis thaliana]	--	--	--	--	slr0959	95.5	1e-19	COG1266	Predicted metal-dependent membrane protease	K07052	4e-48	189	ath:AT1G14270		-	GO:0016787//hydrolase activity	GO:0031410//cytoplasmic vesicle;GO:0043231//intracellular membrane-bounded organelle
Unigene21287_All	827	31	6	1.5543	0.2833	2.4559	up	1.08e-05	0.000148	--	--	--	--	--	--	--	--	--	--	--	--	--	--	--	--	--	--	-	-	-
Unigene35859_All	233	36	7	6.4064	1.1729	2.4494	up	2.08e-06	3.35e-05	--	--	--	--	--	--	--	--	--	--	--	--	--	--	--	--	--	--	-	-	-
Unigene23645_All	558	41	8	3.0466	0.5597	2.4445	up	4.04e-07	7.44e-06	gi|313103588|pdb|3IZ5|U	134	7e-31	Chain U, Localization Of The Large Subunit Ribosomal Proteins Into A 5.5 A Cryo-Em Map Of Triticum Aestivum Translating 80s Ribosome >gi|315113260|pdb|3IZR|U Chain U, Localization Of The Large Subunit Ribosomal Proteins Into A 5.5 A Cryo-Em Map Of Triticum Aestivum Translating 80s Ribosome	sp|Q9UUC1|RL21A_SCHPO	174	4e-43	60S ribosomal protein L21-A OS=Schizosaccharomyces pombe (strain ATCC 38366 / 972) GN=rpl21a PE=2 SV=1	SPBC365.03c	174	1e-43	COG2139	Ribosomal protein L21E	K02889	2e-34	142	ppp:PHYPADRAFT_213645	large subunit ribosomal protein L21e	-	-	GO:0005622//intracellular
Unigene75066_All	396	82	16	8.5859	1.5774	2.4444	up	5.52e-13	2.09e-11	gi|192910734|gb|ACF06475.1|	155	1e-37	ribosomal protein L30 [Elaeis guineensis]	sp|Q7S7F1|RL30_NEUCR	174	2e-43	60S ribosomal protein L30 OS=Neurospora crassa GN=rpl-30 PE=3 SV=1	SPAC9G1.03c	161	2e-40	COG1911	Ribosomal protein L30E	K02908	2e-38	154	sbi:SORBI_09g023950	large subunit ribosomal protein L30e	-	-	-
Unigene34285_All	925	169	33	7.5755	1.3928	2.4434	up	2.89e-25	2.33e-23	gi|226491348|ref|NP_001142253.1|	309	3e-83	hypothetical protein LOC100274422 [Zea mays] >gi|194707854|gb|ACF88011.1| unknown [Zea mays]	sp|P56092|EPD1_CANMA	250	1e-65	Protein EPD1 OS=Candida maltosa GN=EPD1 PE=3 SV=1	--	--	--	--	--	--	--	--	--	--	GO:0044238//primary metabolic process	GO:0043167//ion binding	-
Unigene91307_All	711	4206	828	245.283	45.4662	2.4316	up	0	0	gi|332901279|gb|AEF01492.1|	184	1e-45	metallothionein [Salicornia brachiata]	sp|Q39459|MT2_CICAR	129	2e-29	Metallothionein-like protein 2 OS=Cicer arietinum PE=3 SV=2	--	--	--	--	--	--	--	--	--	--	-	GO:0043169//cation binding	-
Unigene11430_All	968	85	17	3.6409	0.6856	2.4089	up	3.31e-13	1.29e-11	--	--	--	--	--	--	--	--	--	--	--	--	--	--	--	--	--	--	-	-	-
Unigene33800_All	547	30	6	2.2741	0.4282	2.4089	up	1.89e-05	0.000245	gi|18400953|ref|NP_565610.1|	55.5	4e-07	YebC-related protein [Arabidopsis thaliana] >gi|22096384|sp|O82314.2|U082_ARATH RecName: Full=UPF0082 protein At2g25830 >gi|20197365|gb|AAC42247.2| expressed protein [Arabidopsis thaliana] >gi|330252663|gb|AEC07757.1| YebC-related protein [Arabidopsis thaliana]	sp|O82314|U082_ARATH	55.5	2e-07	UPF0082 protein At2g25830 OS=Arabidopsis thaliana GN=At2g25830 PE=2 SV=2	--	--	--	--	--	--	--	--	--	--	-	-	-
Unigene63085_All	463	30	6	2.6866	0.5059	2.4089	up	1.89e-05	0.000245	gi|14253163|emb|CAC39319.1|	75.9	2e-13	VMP4 protein [Volvox carteri f. nagariensis]	sp|A0QV10|Y2408_MYCS2	78.2	2e-14	Uncharacterized oxidoreductase MSMEG_2408 OS=Mycobacterium smegmatis (strain ATCC 700084 / mc(2)155) GN=MSMEG_2408 PE=1 SV=1	Cgl2308	77.4	9e-15	COG0656	Aldo/keto reductases, related to diketogulonate reductase	--	--	--	--	--	-	-	-
Unigene26370_All	345	50	10	6.0092	1.1316	2.4088	up	2.69e-08	6.02e-07	--	--	--	--	--	--	--	--	--	--	--	--	--	--	--	--	--	--	-	-	-
Unigene28615_All	713	80	16	4.6523	0.8761	2.4088	up	1.65e-12	6.01e-11	gi|89179421|gb|ABD63156.1|	138	6e-32	Retrotransposon gag protein [Asparagus officinalis]	--	--	--	--	--	--	--	--	--	--	--	--	--	--	-	-	-
Unigene36802_All	509	30	6	2.4438	0.4602	2.4088	up	1.89e-05	0.000245	gi|159466966|ref|XP_001691669.1|	119	2e-26	fatty acid desaturase, delta-12 [Chlamydomonas reinhardtii] >gi|158279015|gb|EDP04777.1| fatty acid desaturase, delta-12 [Chlamydomonas reinhardtii] >gi|195546504|gb|ACF98526.1| microsomal delta-12 fatty acid desaturase [Chlamydomonas reinhardtii]	sp|P59668|FAD12_MORIS	139	1e-32	Delta(12) fatty acid desaturase OS=Mortierella isabellina PE=2 SV=1	all1597	61.2	9e-10	COG3239	Fatty acid desaturase	K10256	2e-27	119	cre:CHLREDRAFT_135825	omega-6 fatty acid desaturase (delta-12 desaturase) [EC:1.14.19.-]	-	-	-
Unigene49126_All	256	30	6	4.859	0.915	2.4088	up	1.89e-05	0.000245	--	--	--	--	--	--	--	--	--	--	--	--	--	--	--	--	--	--	-	-	-
Unigene8138_All	284	30	6	4.38	0.8248	2.4088	up	1.89e-05	0.000245	--	--	--	--	--	--	--	--	--	--	--	--	--	--	--	--	--	--	-	-	-
Unigene82189_All	443	70	14	6.5518	1.2338	2.4088	up	4.15e-11	1.32e-09	gi|145327199|ref|NP_001077801.1|	74.7	3e-13	Cystathionine beta-synthase (CBS) protein [Arabidopsis thaliana] >gi|332196856|gb|AEE34977.1| Cystathionine beta-synthase (CBS) protein [Arabidopsis thaliana]	--	--	--	--	--	--	--	--	--	--	--	--	--	--	-	-	-
Unigene8439_All	566	40	8	2.9303	0.5518	2.4088	up	7.03e-07	1.24e-05	--	--	--	--	--	--	--	--	--	--	--	--	--	--	--	--	--	--	-	-	-
Unigene13808_All	1455	30	6	0.8549	0.161	2.4087	up	1.89e-05	0.000245	gi|20042890|gb|AAM08718.1|AC116601_11	267	4e-97	Putative gag-pol polyprotein [Oryza sativa Japonica Group]	sp|P04146|COPIA_DROME	151	9e-45	Copia protein OS=Drosophila melanogaster GN=GIP PE=1 SV=3	--	--	--	--	--	--	--	--	--	--	GO:0006259//DNA metabolic process	GO:0016798//hydrolase activity, acting on glycosyl bonds;GO:0003676//nucleic acid binding	-
Unigene25838_All	330	45	9	5.6541	1.0648	2.4087	up	1.37e-07	2.74e-06	--	--	--	--	--	--	--	--	--	--	--	--	--	--	--	--	--	--	-	-	-
Unigene33828_All	233	30	6	5.3387	1.0054	2.4087	up	1.89e-05	0.000245	--	--	--	--	--	--	--	--	--	--	--	--	--	--	--	--	--	--	-	-	-
Unigene49365_All	393	30	6	3.1652	0.5961	2.4087	up	1.89e-05	0.000245	--	--	--	--	--	--	--	--	--	--	--	--	--	--	--	--	--	--	-	-	-
Unigene6361_All	660	35	7	2.1988	0.4141	2.4087	up	3.63e-06	5.54e-05	--	--	--	--	--	--	--	--	--	--	--	--	--	--	--	--	--	--	-	-	-
Unigene8433_All	755	45	9	2.4713	0.4654	2.4087	up	1.37e-07	2.74e-06	--	--	--	--	sp|Q6IN33|RCAN1_RAT	59.7	2e-08	Calcipressin-1 OS=Rattus norvegicus GN=Rcan1 PE=2 SV=1	--	--	--	--	--	--	--	--	--	--	-	-	-
Unigene85382_All	336	30	6	3.7021	0.6972	2.4087	up	1.89e-05	0.000245	--	--	--	--	--	--	--	--	--	--	--	--	--	--	--	--	--	--	-	-	-
Unigene85721_All	277	30	6	4.4907	0.8457	2.4087	up	1.89e-05	0.000245	--	--	--	--	--	--	--	--	--	--	--	--	--	--	--	--	--	--	-	-	-
Unigene59599_All	803	40	8	2.0654	0.389	2.4086	up	7.03e-07	1.24e-05	--	--	--	--	--	--	--	--	--	--	--	--	--	--	--	--	--	--	-	-	-
Unigene18502_All	763	59	12	3.2062	0.614	2.3846	up	1.81e-09	4.76e-08	--	--	--	--	--	--	--	--	--	--	--	--	--	--	--	--	--	--	-	-	-
Unigene76926_All	476	49	10	4.2683	0.8202	2.3796	up	4.66e-08	1e-06	gi|75339286|sp|Q4PSN0.1|PME29_ARATH	109	1e-23	RecName: Full=Probable pectinesterase 29; Short=PE 29; AltName: Full=Pectin methylesterase 29; Short=AtPME29; Flags: Precursor >gi|67633660|gb|AAY78754.1| pectinesterase family protein [Arabidopsis thaliana]	sp|Q4PSN0|PME29_ARATH	109	7e-24	Probable pectinesterase 29 OS=Arabidopsis thaliana GN=PME29 PE=2 SV=1	CAC3373	63.5	1e-10	COG4677	Pectin methylesterase	--	--	--	--	--	-	GO:0016788//hydrolase activity, acting on ester bonds	GO:0005618//cell wall
Unigene43154_All	662	49	10	3.0691	0.5898	2.3795	up	4.66e-08	1e-06	--	--	--	--	--	--	--	--	--	--	--	--	--	--	--	--	--	--	-	-	-
Unigene80187_All	244	161	33	27.3592	5.2802	2.3734	up	2.25e-23	1.68e-21	--	--	--	--	--	--	--	--	--	--	--	--	--	--	--	--	--	--	-	-	-
Unigene121798_All	286	39	8	5.6541	1.0921	2.3722	up	1.22e-06	2.06e-05	--	--	--	--	--	--	--	--	--	--	--	--	--	--	--	--	--	--	-	-	-
Unigene38234_All	383	39	8	4.2221	0.8155	2.3722	up	1.22e-06	2.06e-05	--	--	--	--	--	--	--	--	--	--	--	--	--	--	--	--	--	--	-	-	-
Unigene8501_All	533	39	8	3.0339	0.586	2.3722	up	1.22e-06	2.06e-05	gi|298708482|emb|CBJ30606.1|	150	8e-36	eukaryotic initiation factor 4A [Ectocarpus siliculosus]	sp|A7EGL7|IF4A_SCLS1	167	3e-41	ATP-dependent RNA helicase eIF4A OS=Sclerotinia sclerotiorum (strain ATCC 18683 / 1980 / Ss-1) GN=tif1 PE=3 SV=1	SPAC1006.07	157	7e-39	COG0513	Superfamily II DNA and RNA helicases	K13025	3e-35	145	olu:OSTLU_26958	translation initiation factor eIF-4A 3 [EC:3.6.1.-]	-	GO:0032559//adenyl ribonucleotide binding;GO:0042623//ATPase activity, coupled;GO:0008135//translation factor activity, nucleic acid binding	-
Unigene37931_All	343	34	7	4.1101	0.7968	2.3669	up	6.3e-06	9.14e-05	gi|226528918|ref|NP_001141722.1|	57.8	4e-08	hypothetical protein LOC100273853 [Zea mays] >gi|194705694|gb|ACF86931.1| unknown [Zea mays]	--	--	--	--	--	--	--	--	--	K11128	3e-06	47.4	pop:POPTR_571210	H/ACA ribonucleoprotein complex subunit 1	-	-	-
Unigene47157_All	585	34	7	2.4099	0.4672	2.3669	up	6.3e-06	9.14e-05	--	--	--	--	--	--	--	--	--	--	--	--	--	--	--	--	--	--	-	-	-
Unigene128181_All	551	29	6	2.1823	0.4251	2.36	up	3.28e-05	0.000402	--	--	--	--	--	--	--	--	--	--	--	--	--	--	--	--	--	--	-	-	-
Unigene51483_All	431	29	6	2.7899	0.5435	2.3599	up	3.28e-05	0.000402	--	--	--	--	--	--	--	--	--	--	--	--	--	--	--	--	--	--	-	-	-
Unigene74115_All	233	29	6	5.1607	1.0054	2.3598	up	3.28e-05	0.000402	--	--	--	--	--	--	--	--	--	--	--	--	--	--	--	--	--	--	-	-	-
Unigene90127_All	484	29	6	2.4844	0.484	2.3598	up	3.28e-05	0.000402	--	--	--	--	--	--	--	--	--	--	--	--	--	--	--	--	--	--	-	-	-
Unigene77670_All	308	29	6	3.904	0.7606	2.3597	up	3.28e-05	0.000402	gi|302398659|gb|ADL36624.1|	74.3	4e-13	C2H2L domain class transcription factor [Malus x domestica]	sp|Q39263|ZFP4_ARATH	61.2	2e-09	Zinc finger protein 4 OS=Arabidopsis thaliana GN=ZFP4 PE=2 SV=2	--	--	--	--	--	--	--	--	--	--	-	-	-
Unigene87725_All	321	29	6	3.7459	0.7298	2.3597	up	3.28e-05	0.000402	gi|195623994|gb|ACG33827.1|	96.7	8e-20	inositol-3-phosphate synthase [Zea mays]	sp|Q9FPK7|INO1_MAIZE	96.7	4e-20	Inositol-3-phosphate synthase OS=Zea mays PE=2 SV=2	YJL153c	63.2	1e-10	COG1260	Myo-inositol-1-phosphate synthase	K01858	4e-21	97.1	zma:100384851	myo-inositol-1-phosphate synthase [EC:5.5.1.4]	-	-	-
Unigene30480_All	539	82	17	6.308	1.2314	2.3569	up	1.69e-12	6.14e-11	gi|27923849|sp|Q945U1.1|RS15_ELAOL	231	3e-60	RecName: Full=40S ribosomal protein S15 >gi|15425963|gb|AAK97632.1| 40S ribosomal protein S15 [Elaeis oleifera] >gi|192910788|gb|ACF06502.1| 40S ribosomal protein S15 [Elaeis guineensis]	sp|P34737|RS15_PODAN	293	4e-79	40S ribosomal protein S15 OS=Podospora anserina GN=RPS15 PE=3 SV=1	SPAC1071.07c	216	2e-56	COG0185	Ribosomal protein S19	K02958	5e-61	230	vvi:100256302	small subunit ribosomal protein S15e	-	-	-
Unigene57837_All	786	53	11	2.7959	0.5464	2.3553	up	1.58e-08	3.67e-07	gi|224069629|ref|XP_002326388.1|	167	1e-40	beta-alanine n-methyltransferase related [Populus trichocarpa] >gi|222833581|gb|EEE72058.1| beta-alanine n-methyltransferase related [Populus trichocarpa]	sp|Q6ZD89|OMT1_ORYSJ	82.8	2e-15	Quercetin 3-O-methyltransferase 1 OS=Oryza sativa subsp. japonica GN=ROMT-9 PE=1 SV=1	--	--	--	--	--	K05279	3e-16	82.8	osa:4344702	flavonol 3-O-methyltransferase [EC:2.1.1.76]	-	-	-
Unigene14202_All	2070	96	20	1.923	0.3772	2.35	up	2.35e-14	1.01e-12	gi|334185545|ref|NP_566707.2|	186	1e-45	uncharacterized protein [Arabidopsis thaliana] >gi|332643117|gb|AEE76638.1| uncharacterized protein [Arabidopsis thaliana]	sp|Q2QWE9|SGS3_ORYSJ	53.9	5e-06	Protein SUPPRESSOR OF GENE SILENCING 3 homolog OS=Oryza sativa subsp. japonica GN=SGS3 PE=2 SV=1	--	--	--	--	--	--	--	--	--	--	-	-	GO:0043231//intracellular membrane-bounded organelle
Unigene38068_All	548	48	10	3.6319	0.7124	2.35	up	8.04e-08	1.67e-06	--	--	--	--	--	--	--	--	--	--	--	--	--	--	--	--	--	--	-	-	-
Unigene39779_All	234	48	10	8.5054	1.6684	2.3499	up	8.04e-08	1.67e-06	--	--	--	--	--	--	--	--	--	--	--	--	--	--	--	--	--	--	-	-	-
Unigene38193_All	580	67	14	4.7898	0.9424	2.3456	up	2.12e-10	6.22e-09	gi|194477197|ref|YP_002049376.1|	111	7e-24	3-oxoacyl-(acyl-carrier-protein) reductase [Paulinella chromatophora] >gi|171192204|gb|ACB43166.1| 3-oxoacyl-(acyl-carrier-protein) reductase [Paulinella chromatophora]	sp|Q8NK50|DCXR_TRIRE	328	2e-89	L-xylulose reductase OS=Trichoderma reesei GN=lxr1 PE=2 SV=1	SPAC8E11.10	192	3e-49	COG1028	Dehydrogenases with different specificities (related to short-chain alcohol dehydrogenases)	K00059	2e-23	105	vvi:100254351	3-oxoacyl-[acyl-carrier protein] reductase [EC:1.1.1.100]	GO:0008152//metabolic process	GO:0003824//catalytic activity	-
Unigene39732_All	302	43	9	5.9038	1.1635	2.3432	up	4.1e-07	7.55e-06	--	--	--	--	--	--	--	--	--	--	--	--	--	--	--	--	--	--	-	-	-
Unigene59320_All	985	162	34	6.8194	1.3476	2.3393	up	3.94e-23	2.87e-21	gi|225455400|ref|XP_002278502.1|	75.1	1e-12	PREDICTED: hypothetical protein [Vitis vinifera]	--	--	--	--	--	--	--	--	--	--	--	--	--	--	-	-	-
Unigene18081_All	396	38	8	3.9788	0.7887	2.3348	up	2.11e-06	3.39e-05	--	--	--	--	--	--	--	--	--	--	--	--	--	--	--	--	--	--	-	-	-
Unigene26041_All	585	38	8	2.6934	0.5339	2.3348	up	2.11e-06	3.38e-05	--	--	--	--	--	--	--	--	--	--	--	--	--	--	--	--	--	--	-	-	-
Unigene51902_All	336	57	12	7.034	1.3943	2.3348	up	5.38e-09	1.33e-07	--	--	--	--	--	--	--	--	--	--	--	--	--	--	--	--	--	--	-	-	-
Unigene504_All	882	57	12	2.6796	0.5312	2.3347	up	5.38e-09	1.33e-07	gi|222424836|dbj|BAH20370.1|	230	2e-59	AT3G10720 [Arabidopsis thaliana]	sp|Q9FF77|PME47_ARATH	230	9e-60	Probable pectinesterase/pectinesterase inhibitor 47 OS=Arabidopsis thaliana GN=PME47 PE=2 SV=1	CAC3373	101	1e-21	COG4677	Pectin methylesterase	K01051	1e-60	230	ath:AT5G04970	pectinesterase [EC:3.1.1.11]	GO:0071555	GO:0004091//carboxylesterase activity	GO:0005618//cell wall
Unigene51897_All	343	38	8	4.5936	0.9106	2.3347	up	2.11e-06	3.38e-05	--	--	--	--	--	--	--	--	--	--	--	--	--	--	--	--	--	--	-	-	-
Unigene59772_All	1041	189	40	7.528	1.5002	2.3271	up	1.4e-26	1.2e-24	gi|302843366|ref|XP_002953225.1|	53.1	6e-06	hypothetical protein VOLCADRAFT_63308 [Volvox carteri f. nagariensis] >gi|300261612|gb|EFJ45824.1| hypothetical protein VOLCADRAFT_63308 [Volvox carteri f. nagariensis]	sp|Q02817|MUC2_HUMAN	65.9	5e-10	Mucin-2 OS=Homo sapiens GN=MUC2 PE=1 SV=2	--	--	--	--	--	--	--	--	--	--	-	-	-
Unigene3884_All	535	85	18	6.5877	1.3136	2.3262	up	9.99e-13	3.71e-11	--	--	--	--	--	--	--	--	--	--	--	--	--	--	--	--	--	--	-	-	-
Unigene7509_All	1098	283	60	10.6869	2.1334	2.3246	up	5.55e-39	7.6e-37	gi|600118|emb|CAA84230.1|	129	1e-28	extensin-like protein [Zea mays] >gi|1096557|prf||2111476A extensin-like domain	sp|P04929|HRPX_PLALO	144	1e-33	Histidine-rich glycoprotein OS=Plasmodium lophurae PE=4 SV=1	XF0818	84.3	3e-16	COG2730	Endoglucanase	--	--	--	--	--	-	-	-
Unigene73272_All	285	33	7	4.8011	0.9589	2.3239	up	1.09e-05	0.000149	--	--	--	--	--	--	--	--	--	--	--	--	--	--	--	--	--	--	-	-	-
Unigene87366_All	291	174	37	24.7927	4.9641	2.3203	up	1.65e-24	1.29e-22	--	--	--	--	--	--	--	--	--	--	--	--	--	--	--	--	--	--	-	-	-
Unigene63959_All	637	47	10	3.0593	0.6129	2.3195	up	1.38e-07	2.76e-06	gi|37625523|gb|AAQ96375.1|	167	1e-40	60S ribosomal protein L13 [Solanum palustre]	sp|Q90YV5|RL13_ICTPU	185	2e-46	60S ribosomal protein L13 OS=Ictalurus punctatus GN=rpl13 PE=2 SV=3	YDL082w	181	7e-46	COG4352	Ribosomal protein L13E	K02873	8e-41	164	osa:4333306	large subunit ribosomal protein L13e	-	-	-
Unigene30954_All	718	47	10	2.7142	0.5438	2.3194	up	1.38e-07	2.76e-06	gi|10177966|dbj|BAB11349.1|	143	2e-33	uridine kinase-like protein [Arabidopsis thaliana] >gi|29465725|gb|AAM10488.1| uracil phosphoribosyltransferase [Arabidopsis thaliana]	sp|Q9FKS0|UKL1_ARATH	143	1e-33	Uridine kinase-like protein 1, chloroplastic OS=Arabidopsis thaliana GN=UKL1 PE=1 SV=1	SPAC1399.04c	87.8	2e-17	COG0035	Uracil phosphoribosyltransferase	K00876	7e-37	151	pop:POPTR_815577	uridine kinase [EC:2.7.1.48]	-	-	-
Unigene45139_All	870	47	10	2.24	0.4488	2.3194	up	1.38e-07	2.76e-06	--	--	--	--	--	--	--	--	--	--	--	--	--	--	--	--	--	--	-	-	-
Unigene11256_All	286	89	19	12.903	2.5937	2.3146	up	3.43e-13	1.33e-11	--	--	--	--	sp|Q99334|MT1_COLGL	51.6	1e-06	Metallothionein-like protein CAP3 OS=Colletotrichum gloeosporioides GN=CAP3 PE=2 SV=1	--	--	--	--	--	--	--	--	--	--	-	-	-
Unigene19073_All	422	42	9	4.1267	0.8326	2.3093	up	7.06e-07	1.25e-05	--	--	--	--	--	--	--	--	--	--	--	--	--	--	--	--	--	--	-	-	-
Unigene19735_All	584	28	6	1.988	0.4011	2.3093	up	5.68e-05	0.000649	--	--	--	--	--	--	--	--	--	--	--	--	--	--	--	--	--	--	-	-	-
Unigene41809_All	358	28	6	3.243	0.6543	2.3093	up	5.68e-05	0.000649	--	--	--	--	--	--	--	--	--	--	--	--	--	--	--	--	--	--	-	-	-
Unigene12777_All	295	28	6	3.9355	0.7941	2.3092	up	5.68e-05	0.000649	--	--	--	--	--	--	--	--	--	--	--	--	--	--	--	--	--	--	-	-	-
Unigene43039_All	489	56	12	4.7484	0.9581	2.3092	up	9.23e-09	2.21e-07	--	--	--	--	--	--	--	--	--	--	--	--	--	--	--	--	--	--	-	-	-
Unigene61484_All	448	28	6	2.5915	0.5229	2.3092	up	5.68e-05	0.000649	--	--	--	--	--	--	--	--	--	--	--	--	--	--	--	--	--	--	-	-	-
Unigene78309_All	565	84	18	6.1645	1.2438	2.3092	up	1.71e-12	6.19e-11	--	--	--	--	--	--	--	--	--	--	--	--	--	--	--	--	--	--	-	-	-
Unigene85024_All	420	42	9	4.1464	0.8366	2.3092	up	7.06e-07	1.25e-05	--	--	--	--	--	--	--	--	--	--	--	--	--	--	--	--	--	--	-	-	-
Unigene9307_All	674	28	6	1.7225	0.3476	2.309	up	5.68e-05	0.000649	gi|301108545|ref|XP_002903354.1|	92.8	3e-18	mucin-like protein [Phytophthora infestans T30-4] >gi|262097726|gb|EEY55778.1| mucin-like protein [Phytophthora infestans T30-4]	sp|P47179|DAN4_YEAST	106	2e-22	Cell wall protein DAN4 OS=Saccharomyces cerevisiae (strain ATCC 204508 / S288c) GN=DAN4 PE=2 SV=1	YGR189c	69.7	4e-12	COG2273	Beta-glucanase/Beta-glucan synthetase	--	--	--	--	--	-	-	GO:0043231//intracellular membrane-bounded organelle;GO:0044444//cytoplasmic part
Unigene81255_All	455	37	8	3.3718	0.6864	2.2964	up	3.62e-06	5.53e-05	gi|302851191|ref|XP_002957120.1|	232	1e-60	component of cytosolic 80S ribosome and 40S small subunit [Volvox carteri f. nagariensis] >gi|300257527|gb|EFJ41774.1| component of cytosolic 80S ribosome and 40S small subunit [Volvox carteri f. nagariensis]	sp|P19115|RS14_NEUCR	245	7e-65	40S ribosomal protein S14 OS=Neurospora crassa GN=rps-14 PE=3 SV=2	SPBC18H10.13	214	5e-56	COG0100	Ribosomal protein S11	K02955	1e-61	232	ppp:PHYPADRAFT_198161	small subunit ribosomal protein S14e	GO:0000270//peptidoglycan metabolic process;GO:0010467//gene expression	GO:0003723//RNA binding;GO:0005198//structural molecule activity;GO:0016780//phosphotransferase activity, for other substituted phosphate groups	GO:0031224//intrinsic to membrane;GO:0009536//plastid;GO:0030529//ribonucleoprotein complex
Unigene22496_All	318	37	8	4.8244	0.9822	2.2963	up	3.62e-06	5.53e-05	--	--	--	--	--	--	--	--	--	--	--	--	--	--	--	--	--	--	-	-	-
Unigene47038_All	544	69	15	5.2592	1.0765	2.2885	up	2.12e-10	6.22e-09	gi|18407264|ref|NP_566095.1|	263	9e-70	ubiquitin-40S ribosomal protein S27a-2 [Arabidopsis thaliana] >gi|334184963|ref|NP_001189768.1| ubiquitin-40S ribosomal protein S27a-2 [Arabidopsis thaliana] >gi|302393741|sp|P59232.2|R27AB_ARATH RecName: Full=Ubiquitin-40S ribosomal protein S27a-2; Contains: RecName: Full=Ubiquitin; Contains: RecName: Full=40S ribosomal protein S27a-2; Flags: Precursor >gi|14030651|gb|AAK53000.1|AF375416_1 At2g4…	sp|P14799|RS27A_NEUCR	296	7e-80	Ubiquitin-40S ribosomal protein S27a OS=Neurospora crassa GN=ubi-3 PE=1 SV=4	YLR167w_1	194	6e-50	COG5272	Ubiquitin	K02977	7e-71	263	ath:AT2G47110	small subunit ribosomal protein S27Ae	-	-	-
Unigene52492_All	528	46	10	3.6124	0.7394	2.2885	up	2.37e-07	4.58e-06	--	--	--	--	--	--	--	--	--	--	--	--	--	--	--	--	--	--	-	-	-
Unigene70679_All	1145	46	10	1.6658	0.341	2.2884	up	2.37e-07	4.57e-06	gi|42569681|ref|NP_181207.2|	326	3e-88	2-oxoglutarate (2OG) and Fe(II)-dependent oxygenase-like protein [Arabidopsis thaliana] >gi|330254192|gb|AEC09286.1| 2-oxoglutarate (2OG) and Fe(II)-dependent oxygenase-like protein [Arabidopsis thaliana]	sp|Q05964|FL3H_DIACA	137	2e-31	Naringenin,2-oxoglutarate 3-dioxygenase OS=Dianthus caryophyllus GN=FHT PE=2 SV=1	PA0147	71.6	2e-12	COG3491	Isopenicillin N synthase and related dioxygenases	K00475	8e-31	132	ath:AT3G51240	naringenin 3-dioxygenase [EC:1.14.11.9]	-	GO:0016491//oxidoreductase activity	-
Unigene25176_All	313	55	12	7.2859	1.4968	2.2832	up	1.58e-08	3.66e-07	--	--	--	--	--	--	--	--	--	--	--	--	--	--	--	--	--	--	-	-	-
Unigene34527_All	631	32	7	2.1028	0.4331	2.2795	up	1.87e-05	0.000243	gi|186498690|ref|NP_565281.2|	130	2e-29	transcription factor [Arabidopsis thaliana] >gi|330250446|gb|AEC05540.1| transcription factor [Arabidopsis thaliana]	sp|Q93WJ9|KAN1_ARATH	92.8	2e-18	Transcription repressor KAN1 OS=Arabidopsis thaliana GN=KAN1 PE=2 SV=1	--	--	--	--	--	--	--	--	--	--	GO:0010468//regulation of gene expression	GO:0003676//nucleic acid binding	GO:0043231//intracellular membrane-bounded organelle
Unigene75122_All	663	32	7	2.0013	0.4122	2.2795	up	1.87e-05	0.000243	--	--	--	--	--	--	--	--	--	--	--	--	--	--	--	--	--	--	-	-	-
Unigene37509_All	331	32	7	4.0086	0.8257	2.2794	up	1.87e-05	0.000243	gi|66841325|dbj|BAD99221.1|	81.3	7e-20	polypepetide with reverse transcriptase and RNaseH domains [Petunia x hybrida]	sp|P04146|COPIA_DROME	63.9	3e-10	Copia protein OS=Drosophila melanogaster GN=GIP PE=1 SV=3	--	--	--	--	--	--	--	--	--	--	-	-	-
Unigene33143_All	652	41	9	2.6074	0.5389	2.2745	up	1.21e-06	2.04e-05	--	--	--	--	--	--	--	--	--	--	--	--	--	--	--	--	--	--	-	-	-
Unigene64530_All	816	41	9	2.0833	0.4306	2.2745	up	1.21e-06	2.04e-05	gi|226490975|ref|NP_001147262.1|	344	7e-94	60S ribosomal protein L13a-2 [Zea mays] >gi|195609234|gb|ACG26447.1| 60S ribosomal protein L13a-2 [Zea mays]	sp|Q9P720|RL16_NEUCR	362	1e-99	60S ribosomal protein L16 OS=Neurospora crassa GN=rpl-16 PE=3 SV=1	YIL133c	288	6e-78	COG0102	Ribosomal protein L13	K02872	5e-95	344	zma:100280870	large subunit ribosomal protein L13Ae	GO:0010467//gene expression	GO:0005488//binding;GO:0005198//structural molecule activity	-
Unigene24645_All	275	36	8	5.428	1.1358	2.2567	up	6.21e-06	9.02e-05	gi|60543050|dbj|BAD90774.1|	101	3e-21	histone 3 [Conocephalum supradecompositum]	sp|P61836|H3_ZYGBA	101	1e-21	Histone H3 OS=Zygosaccharomyces bailii GN=HHT1 PE=1 SV=2	YNL031c	101	3e-22	COG2036	Histones H3 and H4	K11253	2e-21	98.2	olu:OSTLU_17380	histone H3	GO:0034728	GO:0003676//nucleic acid binding	GO:0000785//chromatin;GO:0043231//intracellular membrane-bounded organelle
Unigene9308_All	734	85	19	4.8017	1.0106	2.2483	up	2.88e-12	1.02e-10	gi|2208935|dbj|BAA20486.1|	223	2e-57	plasma membrane H+-ATPase [Cyanidium caldarium]	sp|P07038|PMA1_NEUCR	462	1e-129	Plasma membrane ATPase OS=Neurospora crassa GN=pma-1 PE=1 SV=1	SPAC1071.10c	412	4e-115	COG0474	Cation transport ATPase	K01535	7e-58	221	cme:CMQ247C	H+-transporting ATPase [EC:3.6.3.6]	GO:0010118//stomatal movement;GO:0009725//response to hormone stimulus;GO:0015988//energy coupled proton transport, against electrochemical gradient;GO:0006950//response to stress	GO:0046872//metal ion binding;GO:0015662//ATPase activity, coupled to transmembrane movement of ions, phosphorylative mechanism	GO:0031224//intrinsic to membrane;GO:0043231//intracellular membrane-bounded organelle
Unigene75142_All	471	49	11	4.3136	0.9118	2.2421	up	1.36e-07	2.72e-06	gi|300078613|gb|ADJ67207.1|	57.4	7e-08	early nodulin 20 precursor [Jatropha curcas]	sp|Q9SX31|PERK9_ARATH	53.9	4e-07	Proline-rich receptor-like protein kinase PERK9 OS=Arabidopsis thaliana GN=PERK9 PE=2 SV=1	--	--	--	--	--	--	--	--	--	--	-	-	-
Unigene9452_All	465	49	11	4.3693	0.9236	2.2421	up	1.36e-07	2.72e-06	gi|6831607|sp|Q9ZRS8.1|RL37A_PSEMZ	135	1e-31	RecName: Full=60S ribosomal protein L37a >gi|4090257|emb|CAA10493.1| ribosomal protein L37A [Pseudotsuga menziesii]	sp|Q6FRG6|RL43_CANGA	145	1e-34	60S ribosomal protein L43 OS=Candida glabrata (strain ATCC 2001 / CBS 138 / JCM 3761 / NBRC 0622 / NRRL Y-65) GN=RPL43 PE=3 SV=1	YPR043w	142	2e-34	COG1997	Ribosomal protein L37AE/L43A	K02921	2e-33	138	ppp:PHYPADRAFT_180041	large subunit ribosomal protein L37Ae	GO:0010467//gene expression	GO:0043169//cation binding;GO:0005198//structural molecule activity	GO:0043231//intracellular membrane-bounded organelle;GO:0030529//ribonucleoprotein complex
Unigene49240_All	435	80	18	7.6255	1.6155	2.2389	up	1.43e-11	4.75e-10	gi|114329242|gb|ABI64150.1|	143	8e-34	gibberellin 3-oxidase [Pisum sativum]	sp|Q9SVS8|G3OX3_ARATH	119	5e-27	Gibberellin 3-beta-dioxygenase 3 OS=Arabidopsis thaliana GN=At4g21690 PE=2 SV=1	--	--	--	--	--	K04124	5e-23	103	ath:AT1G80340	gibberellin 3-beta-dioxygenase [EC:1.14.11.15]	-	-	-
Unigene91068_All	606	40	9	2.7369	0.5798	2.2389	up	2.06e-06	3.33e-05	--	--	--	--	--	--	--	--	--	--	--	--	--	--	--	--	--	--	-	-	-
Unigene82161_All	385	40	9	4.3079	0.9127	2.2388	up	2.06e-06	3.33e-05	--	--	--	--	--	--	--	--	--	--	--	--	--	--	--	--	--	--	-	-	-
Unigene57011_All	421	31	7	3.0531	0.6491	2.2338	up	3.21e-05	0.000394	gi|116309383|emb|CAH66462.1|	59.7	1e-08	H0718E12.6 [Oryza sativa Indica Group] >gi|116309384|emb|CAH66463.1| H0718E12.7 [Oryza sativa Indica Group]	--	--	--	--	--	--	--	--	--	K03026	9e-10	59.7	osa:4335691	DNA-directed RNA polymerase III subunit C4 [EC:2.7.7.6]	-	-	-
Unigene68726_All	251	31	7	5.121	1.0888	2.2337	up	3.21e-05	0.000394	--	--	--	--	--	--	--	--	--	--	--	--	--	--	--	--	--	--	-	-	-
Unigene73907_All	304	31	7	4.2282	0.899	2.2337	up	3.21e-05	0.000394	--	--	--	--	--	--	--	--	--	--	--	--	--	--	--	--	--	--	-	-	-
Unigene6545_All	476	62	14	5.4007	1.1483	2.2336	up	3.08e-09	7.83e-08	gi|48596993|gb|AAT46037.1|	57.4	7e-08	At5g54075 [Arabidopsis thaliana] >gi|50198954|gb|AAT70480.1| At5g54075 [Arabidopsis thaliana]	--	--	--	--	--	--	--	--	--	--	--	--	--	--	-	-	-
Unigene87717_All	273	31	7	4.7083	1.0011	2.2336	up	3.21e-05	0.000394	--	--	--	--	--	--	--	--	--	--	--	--	--	--	--	--	--	--	-	-	-
Unigene6994_All	304	44	10	6.0013	1.2843	2.2243	up	6.9e-07	1.22e-05	--	--	--	--	--	--	--	--	--	--	--	--	--	--	--	--	--	--	-	-	-
Unigene59319_All	799	57	13	2.958	0.6352	2.2193	up	1.54e-08	3.58e-07	gi|225455400|ref|XP_002278502.1|	73.2	4e-12	PREDICTED: hypothetical protein [Vitis vinifera]	--	--	--	--	--	--	--	--	--	--	--	--	--	--	-	-	-
Unigene86448_All	328	57	13	7.2056	1.5474	2.2193	up	1.54e-08	3.58e-07	--	--	--	--	--	--	--	--	--	--	--	--	--	--	--	--	--	--	-	-	-
Unigene84986_All	435	57	13	5.4332	1.1668	2.2192	up	1.54e-08	3.58e-07	--	--	--	--	--	--	--	--	--	--	--	--	--	--	--	--	--	--	-	-	-
Unigene7925_All	559	35	8	2.5961	0.5587	2.2162	up	1.06e-05	0.000146	gi|12322008|gb|AAG51046.1|AC069473_8	218	3e-56	gypsy/Ty-3 retroelement polyprotein; 69905-74404 [Arabidopsis thaliana] >gi|10998138|dbj|BAB03109.1| retroelement pol polyprotein [Arabidopsis thaliana]	sp|Q9UR07|RTF23_SCHPO	90.5	6e-18	Retrotransposable element Tf2 155 kDa protein type 3 OS=Schizosaccharomyces pombe (strain ATCC 38366 / 972) GN=Tf2-11 PE=4 SV=1	SPAC9.04	90.5	2e-18	COG2801	Transposase and inactivated derivatives	--	--	--	--	--	GO:0006259//DNA metabolic process	GO:0003676//nucleic acid binding	GO:0043231//intracellular membrane-bounded organelle
Unigene85668_All	327	35	8	4.438	0.9551	2.2162	up	1.06e-05	0.000146	--	--	--	--	--	--	--	--	--	--	--	--	--	--	--	--	--	--	-	-	-
Unigene7568_All	593	35	8	2.4473	0.5267	2.2161	up	1.06e-05	0.000146	--	--	--	--	--	--	--	--	--	--	--	--	--	--	--	--	--	--	-	-	-
Unigene86133_All	379	35	8	3.8291	0.8241	2.2161	up	1.06e-05	0.000146	--	--	--	--	--	--	--	--	--	--	--	--	--	--	--	--	--	--	-	-	-
Unigene8745_All	536	35	8	2.7075	0.5827	2.2161	up	1.06e-05	0.000146	--	--	--	--	--	--	--	--	--	--	--	--	--	--	--	--	--	--	-	-	-
Unigene15183_All	1351	35	8	1.0742	0.2312	2.216	up	1.06e-05	0.000146	gi|42569129|ref|NP_179444.2|	62.4	1e-08	RmlC-like cupin-like protein [Arabidopsis thaliana] >gi|330251685|gb|AEC06779.1| RmlC-like cupin-like protein [Arabidopsis thaliana]	sp|A5E4P1|PXR1_LODEL	72.4	7e-12	Protein PXR1 OS=Lodderomyces elongisporus (strain ATCC 11503 / CBS 2605 / JCM 1781 / NBRC 1676 / NRRL YB-4239) GN=PXR1 PE=3 SV=1	MJ0884	52	2e-06	COG0470	ATPase involved in DNA replication	K13091	5e-09	60.1	vvi:100243992	RNA-binding protein 39	-	-	-
Unigene43202_All	1687	61	14	1.4993	0.324	2.2102	up	5.21e-09	1.29e-07	gi|297839869|ref|XP_002887816.1|	328	1e-88	transducin family protein [Arabidopsis lyrata subsp. lyrata] >gi|297333657|gb|EFH64075.1| transducin family protein [Arabidopsis lyrata subsp. lyrata]	sp|Q38942|RAE1L_ARATH	322	4e-87	Rae1-like protein At1g80670 OS=Arabidopsis thaliana GN=At1g80670 PE=2 SV=2	all0664	66.2	2e-10	COG2319	FOG: WD40 repeat	--	--	--	--	--	-	GO:0005488//binding	GO:0031461//cullin-RING ubiquitin ligase complex;GO:0043231//intracellular membrane-bounded organelle
Unigene74112_All	520	61	14	4.864	1.0511	2.2102	up	5.21e-09	1.29e-07	gi|115438741|ref|NP_001043650.1|	89.7	2e-17	Os01g0631900 [Oryza sativa Japonica Group] >gi|113533181|dbj|BAF05564.1| Os01g0631900 [Oryza sativa Japonica Group]	sp|Q01294|CARP_NEUCR	177	4e-44	Vacuolar protease A OS=Neurospora crassa GN=pep-4 PE=3 SV=2	--	--	--	--	--	K08245	1e-18	89.7	osa:4326588	phytepsin [EC:3.4.23.40]	-	-	-
Unigene10999_All	357	39	9	4.5296	0.9842	2.2024	up	3.51e-06	5.38e-05	--	--	--	--	--	--	--	--	--	--	--	--	--	--	--	--	--	--	-	-	-
Unigene24865_All	365	39	9	4.4304	0.9627	2.2023	up	3.51e-06	5.38e-05	--	--	--	--	--	--	--	--	--	--	--	--	--	--	--	--	--	--	-	-	-
Unigene76531_All	561	78	18	5.765	1.2527	2.2023	up	4.09e-11	1.3e-09	gi|298708482|emb|CBJ30606.1|	147	8e-35	eukaryotic initiation factor 4A [Ectocarpus siliculosus]	sp|Q2HFP1|IF4A_CHAGB	213	6e-55	ATP-dependent RNA helicase eIF4A OS=Chaetomium globosum GN=TIF1 PE=3 SV=1	SPAC1006.07	167	1e-41	COG0513	Superfamily II DNA and RNA helicases	K03257	1e-33	139	cme:CMK028C	translation initiation factor eIF-4A	GO:0006412//translation;GO:0010038//response to metal ion	GO:0042623//ATPase activity, coupled;GO:0008135//translation factor activity, nucleic acid binding;GO:0032559//adenyl ribonucleotide binding	GO:0005618//cell wall;GO:0031981//nuclear lumen;GO:0044444//cytoplasmic part;GO:0016020//membrane
Unigene26704_All	740	99	23	5.5472	1.2135	2.1926	up	1.12e-13	4.54e-12	--	--	--	--	--	--	--	--	--	--	--	--	--	--	--	--	--	--	-	-	-
Unigene53286_All	638	43	10	2.7946	0.6119	2.1913	up	1.17e-06	1.98e-05	--	--	--	--	--	--	--	--	--	--	--	--	--	--	--	--	--	--	-	-	-
Unigene83330_All	616	43	10	2.8944	0.6338	2.1912	up	1.17e-06	1.98e-05	gi|42571377|ref|NP_973779.1|	160	1e-38	dessication-induced 1VOC-like protein [Arabidopsis thaliana] >gi|8439904|gb|AAF75090.1|AC007583_26 ESTs gb|Z27026 and gb|29860 come from this gene [Arabidopsis thaliana] >gi|332190036|gb|AEE28157.1| dessication-induced 1VOC-like protein [Arabidopsis thaliana]	--	--	--	--	--	--	--	--	--	--	--	--	--	--	GO:0050896//response to stimulus	GO:0003824//catalytic activity	GO:0031410//cytoplasmic vesicle
Unigene6710_All	734	116	27	6.5528	1.4361	2.19	up	9.13e-16	4.37e-14	--	--	--	--	--	--	--	--	--	--	--	--	--	--	--	--	--	--	-	-	-
Unigene22977_All	511	30	7	2.4343	0.5348	2.1864	up	5.46e-05	0.000627	gi|225443452|ref|XP_002268584.1|	54.7	6e-07	PREDICTED: hypothetical protein [Vitis vinifera]	--	--	--	--	--	--	--	--	--	--	--	--	--	--	-	GO:0005488//binding	-
Unigene59712_All	682	30	7	1.8239	0.4007	2.1864	up	5.46e-05	0.000627	--	--	--	--	--	--	--	--	--	--	--	--	--	--	--	--	--	--	-	-	-
Unigene23018_All	430	30	7	2.8928	0.6356	2.1863	up	5.46e-05	0.000627	--	--	--	--	--	--	--	--	--	--	--	--	--	--	--	--	--	--	-	-	-
Unigene37601_All	426	227	53	22.0945	4.8573	2.1855	up	2.23e-29	2.14e-27	--	--	--	--	--	--	--	--	--	--	--	--	--	--	--	--	--	--	-	-	-
Unigene16864_All	645	137	32	8.807	1.9369	2.1849	up	2.59e-18	1.47e-16	gi|297825203|ref|XP_002880484.1|	219	2e-56	armadillo/beta-catenin repeat family protein [Arabidopsis lyrata subsp. lyrata] >gi|297326323|gb|EFH56743.1| armadillo/beta-catenin repeat family protein [Arabidopsis lyrata subsp. lyrata]	sp|O22193|PUB4_ARATH	218	2e-56	U-box domain-containing protein 4 OS=Arabidopsis thaliana GN=PUB4 PE=1 SV=2	--	--	--	--	--	--	--	--	--	--	-	-	-
Unigene2206_All	1089	34	8	1.2946	0.2868	2.1744	up	1.8e-05	0.000236	gi|15450962|gb|AAK96752.1|	166	7e-40	Unknown protein [Arabidopsis thaliana]	--	--	--	--	--	--	--	--	--	--	--	--	--	--	-	-	GO:0044464//cell part
Unigene16780_All	278	34	8	5.0711	1.1235	2.1743	up	1.8e-05	0.000236	--	--	--	--	--	--	--	--	--	--	--	--	--	--	--	--	--	--	-	-	-
Unigene22341_All	593	34	8	2.3773	0.5267	2.1743	up	1.8e-05	0.000236	--	--	--	--	--	--	--	--	--	--	--	--	--	--	--	--	--	--	-	-	-
Unigene67753_All	575	34	8	2.4518	0.5432	2.1743	up	1.8e-05	0.000236	gi|240256444|ref|NP_200255.5|	162	3e-39	protein CLUB [Arabidopsis thaliana] >gi|332009113|gb|AED96496.1| protein CLUB [Arabidopsis thaliana]	--	--	--	--	--	--	--	--	--	--	--	--	--	--	-	-	-
Unigene80864_All	387	34	8	3.6428	0.8071	2.1742	up	1.8e-05	0.000236	--	--	--	--	--	--	--	--	--	--	--	--	--	--	--	--	--	--	-	-	-
Unigene10452_All	264	753	178	118.266	26.3235	2.1676	up	1.1e-92	3.72e-90	--	--	--	--	--	--	--	--	--	--	--	--	--	--	--	--	--	--	-	-	-
Unigene21791_All	272	38	9	5.7927	1.2918	2.1649	up	5.95e-06	8.67e-05	--	--	--	--	--	--	--	--	--	--	--	--	--	--	--	--	--	--	-	-	-
Unigene22883_All	509	38	9	3.0955	0.6903	2.1649	up	5.95e-06	8.67e-05	gi|270346380|pdb|2WWB|M	151	4e-36	Chain M, Cryo-Em Structure Of The Mammalian Sec61 Complex Bound To The Actively Translating Wheat Germ 80s Ribosome	sp|Q757D7|RL31_ASHGO	153	5e-37	60S ribosomal protein L31 OS=Ashbya gossypii (strain ATCC 10895 / CBS 109.51 / FGSC 9923 / NRRL Y-1056) GN=RPL31 PE=3 SV=1	YLR406c	151	6e-37	COG2097	Ribosomal protein L31E	K02910	1e-32	136	ppp:PHYPADRAFT_162993	large subunit ribosomal protein L31e	-	-	GO:0030529//ribonucleoprotein complex
Unigene73780_All	692	38	9	2.2769	0.5078	2.1647	up	5.95e-06	8.67e-05	gi|9989054|gb|AAG10817.1|AC011808_5	85.5	2e-31	Putative retroelement polyprotein [Arabidopsis thaliana]	sp|P10978|POLX_TOBAC	81.6	5e-25	Retrovirus-related Pol polyprotein from transposon TNT 1-94 OS=Nicotiana tabacum PE=2 SV=1	--	--	--	--	--	--	--	--	--	--	-	GO:0005488//binding	-
Unigene34000_All	1034	105	25	4.2105	0.9439	2.1573	up	3.68e-14	1.56e-12	gi|299471133|emb|CBN78991.1|	77.4	3e-13	F5/8 type C domain protein [Ectocarpus siliculosus]	sp|Q09788|YA9A_SCHPO	103	2e-21	Uncharacterized serine-rich protein C13G6.10c OS=Schizosaccharomyces pombe (strain ATCC 38366 / 972) GN=SPAC13G6.10c PE=2 SV=1	--	--	--	--	--	--	--	--	--	--	-	-	-
Unigene41618_All	667	42	10	2.6109	0.5853	2.1573	up	1.98e-06	3.2e-05	--	--	--	--	--	--	--	--	--	--	--	--	--	--	--	--	--	--	-	-	-
Unigene46518_All	634	79	19	5.1666	1.17	2.1427	up	6.59e-11	2.05e-09	--	--	--	--	--	--	--	--	--	--	--	--	--	--	--	--	--	--	-	-	-
Unigene120764_All	301	29	7	3.9948	0.9079	2.1375	up	9.26e-05	0.000997	gi|323449313|gb|EGB05202.1|	67	7e-11	expressed protein [Aureococcus anophagefferens]	sp|A5E4P1|PXR1_LODEL	68.6	1e-11	Protein PXR1 OS=Lodderomyces elongisporus (strain ATCC 11503 / CBS 2605 / JCM 1781 / NBRC 1676 / NRRL YB-4239) GN=PXR1 PE=3 SV=1	aq_2032	54.7	4e-08	COG0532	Translation initiation factor 2 (IF-2; GTPase)	K11984	3e-11	63.9	ppp:PHYPADRAFT_233757	U4/U6.U5 tri-snRNP-associated protein 1	GO:0034728	GO:0003676//nucleic acid binding	GO:0000785//chromatin
Unigene40257_All	393	29	7	3.0597	0.6954	2.1375	up	9.26e-05	0.000997	--	--	--	--	--	--	--	--	--	--	--	--	--	--	--	--	--	--	-	-	-
Unigene48374_All	509	29	7	2.3624	0.5369	2.1375	up	9.26e-05	0.000997	--	--	--	--	--	--	--	--	--	--	--	--	--	--	--	--	--	--	-	-	-
Unigene76021_All	397	29	7	3.0288	0.6884	2.1374	up	9.26e-05	0.000997	--	--	--	--	--	--	--	--	--	--	--	--	--	--	--	--	--	--	-	-	-
Unigene42641_All	1010	29	7	1.1905	0.2706	2.1373	up	9.26e-05	0.000997	gi|30690620|ref|NP_850470.1|	170	5e-63	DNA methyltransferase 1-associated protein 1 [Arabidopsis thaliana] >gi|330255720|gb|AEC10814.1| DNA methyltransferase 1-associated protein 1 [Arabidopsis thaliana]	--	--	--	--	--	--	--	--	--	K11324	1e-71	179	vvi:100265771	DNA methyltransferase 1-associated protein 1	GO:0010468//regulation of gene expression;GO:0006351//transcription, DNA-dependent	GO:0003676//nucleic acid binding;GO:0001071;GO:0016740//transferase activity	GO:0043231//intracellular membrane-bounded organelle
Unigene20735_All	496	33	8	2.7587	0.6297	2.1313	up	3.04e-05	0.000375	--	--	--	--	--	--	--	--	--	--	--	--	--	--	--	--	--	--	-	-	-
Unigene45679_All	805	33	8	1.6998	0.388	2.1312	up	3.04e-05	0.000375	gi|113205319|gb|AAT38756.2|	67	3e-10	Putative methyltransferase family protein [Solanum demissum]	--	--	--	--	--	--	--	--	--	--	--	--	--	--	-	GO:0046914//transition metal ion binding;GO:0016740//transferase activity	-
Unigene21197_All	539	37	9	2.8463	0.6519	2.1264	up	1e-05	0.000139	gi|8843739|dbj|BAA97287.1|	134	6e-31	retroelement pol polyprotein-like [Arabidopsis thaliana]	sp|P04146|COPIA_DROME	87.8	4e-17	Copia protein OS=Drosophila melanogaster GN=GIP PE=1 SV=3	--	--	--	--	--	K05356	3e-12	68.9	sbi:SORBI_0011s005450	solanesyl diphosphate synthase [EC:2.5.1.11]	-	-	-
Unigene58586_All	674	37	9	2.2762	0.5213	2.1264	up	1e-05	0.000139	--	--	--	--	--	--	--	--	--	--	--	--	--	--	--	--	--	--	-	-	-
Unigene78583_All	469	37	9	3.2711	0.7492	2.1264	up	1e-05	0.000139	--	--	--	--	--	--	--	--	--	--	--	--	--	--	--	--	--	--	-	-	-
Unigene36048_All	406	37	9	3.7787	0.8655	2.1263	up	1e-05	0.000139	--	--	--	--	--	--	--	--	--	--	--	--	--	--	--	--	--	--	-	-	-
Unigene46290_All	636	37	9	2.4122	0.5525	2.1263	up	1e-05	0.000139	gi|226492324|ref|NP_001142207.1|	87	2e-16	hypothetical protein LOC100274375 [Zea mays] >gi|194707598|gb|ACF87883.1| unknown [Zea mays]	--	--	--	--	--	--	--	--	--	--	--	--	--	--	-	-	-
Unigene59088_All	1080	41	10	1.5741	0.3615	2.1225	up	3.33e-06	5.13e-05	gi|115446717|ref|NP_001047138.1|	98.6	1e-19	Os02g0557300 [Oryza sativa Japonica Group] >gi|113536669|dbj|BAF09052.1| Os02g0557300 [Oryza sativa Japonica Group]	sp|Q9SN27|ATL59_ARATH	98.2	9e-20	E3 ubiquitin-protein ligase ATL59 OS=Arabidopsis thaliana GN=ATL59 PE=1 SV=1	--	--	--	--	--	K11982	3e-10	63.9	sbi:SORBI_03g011120	E3 ubiquitin-protein ligase RNF115/126 [EC:6.3.2.19]	GO:0006810//transport;GO:0032446//protein modification by small protein conjugation	GO:0046914//transition metal ion binding;GO:0019787//small conjugating protein ligase activity	GO:0016020//membrane
Unigene37978_All	282	45	11	6.6165	1.5229	2.1192	up	1.11e-06	1.88e-05	--	--	--	--	--	--	--	--	--	--	--	--	--	--	--	--	--	--	-	-	-
Unigene80489_All	1028	45	11	1.815	0.4178	2.1191	up	1.11e-06	1.88e-05	gi|15237497|ref|NP_198897.1|	291	1e-77	ubiquinol-cytochrome c reductase cytochrome c1 subunit [Arabidopsis thaliana] >gi|10177960|dbj|BAB11343.1| cytochrome c1 precursor [Arabidopsis thaliana] >gi|332007214|gb|AED94597.1| ubiquinol-cytochrome c reductase cytochrome c1 subunit [Arabidopsis thaliana]	sp|P29610|CY12_SOLTU	281	5e-75	Cytochrome c1-2, heme protein, mitochondrial (Fragment) OS=Solanum tuberosum GN=CYCL PE=1 SV=1	SPBC29A3.18	194	3e-53	COG2857	Cytochrome c1	K00413	2e-79	293	vvi:100250724	ubiquinol-cytochrome c reductase cytochrome c1 subunit [EC:1.10.2.2]	-	GO:0009055//electron carrier activity;GO:0005506//iron ion binding	GO:0005746//mitochondrial respiratory chain
Unigene19853_All	974	49	12	2.086	0.481	2.1166	up	3.7e-07	6.87e-06	gi|240254028|ref|NP_172209.4|	332	4e-90	golgi nucleotide sugar transporter 2 [Arabidopsis thaliana] >gi|75146971|sp|Q84L09.1|GONS2_ARATH RecName: Full=GDP-mannose transporter GONST2; AltName: Full=Protein GOLGI NUCLEOTIDE SUGAR TRANSPORTER 2 >gi|29329819|emb|CAD83086.1| GONST2 Golgi Nucleotide sugar transporter [Arabidopsis thaliana] >gi|332189982|gb|AEE28103.1| golgi nucleotide sugar transporter 2 [Arabidopsis thaliana]	sp|Q84L09|GONS2_ARATH	332	2e-90	GDP-mannose transporter GONST2 OS=Arabidopsis thaliana GN=GONST2 PE=2 SV=1	YER039c	124	3e-28	COG5070	Nucleotide-sugar transporter	--	--	--	--	--	GO:0015781//pyrimidine nucleotide-sugar transport	GO:0015165//pyrimidine nucleotide sugar transmembrane transporter activity;GO:0017111//nucleoside-triphosphatase activity;GO:0032559//adenyl ribonucleotide binding	GO:0043231//intracellular membrane-bounded organelle;GO:0031224//intrinsic to membrane
Unigene42576_All	798	57	14	2.9617	0.6849	2.1125	up	4.17e-08	9.05e-07	--	--	--	--	--	--	--	--	--	--	--	--	--	--	--	--	--	--	-	-	-
Unigene8304_All	779	93	23	4.9501	1.1527	2.1024	up	2.45e-12	8.76e-11	gi|8843739|dbj|BAA97287.1|	193	2e-48	retroelement pol polyprotein-like [Arabidopsis thaliana]	--	--	--	--	--	--	--	--	--	--	--	--	--	--	-	GO:0005488//binding	-
Unigene18539_All	1434	36	9	1.0409	0.245	2.087	up	1.68e-05	0.000222	gi|297829048|ref|XP_002882406.1|	271	2e-71	zinc finger family protein [Arabidopsis lyrata subsp. lyrata] >gi|297328246|gb|EFH58665.1| zinc finger family protein [Arabidopsis lyrata subsp. lyrata]	sp|Q9NS56|TOPRS_HUMAN	56.6	4e-07	E3 ubiquitin-protein ligase Topors OS=Homo sapiens GN=TOPORS PE=1 SV=1	--	--	--	--	--	--	--	--	--	--	-	GO:0046914//transition metal ion binding	GO:0031410//cytoplasmic vesicle;GO:0043231//intracellular membrane-bounded organelle
Unigene56295_All	830	36	9	1.7984	0.4233	2.087	up	1.68e-05	0.000222	--	--	--	--	--	--	--	--	--	--	--	--	--	--	--	--	--	--	-	-	-
Unigene13245_All	458	68	17	6.1562	1.4491	2.0869	up	2.67e-09	6.86e-08	--	--	--	--	--	--	--	--	--	--	--	--	--	--	--	--	--	--	-	-	-
Unigene66738_All	403	100	25	10.2888	2.4219	2.0869	up	4.74e-13	1.81e-11	--	--	--	--	--	--	--	--	--	--	--	--	--	--	--	--	--	--	-	-	-
Unigene75848_All	538	36	9	2.7745	0.6531	2.0869	up	1.68e-05	0.000222	gi|115473801|ref|NP_001060499.1|	68.6	4e-11	Os07g0655800 [Oryza sativa Japonica Group] >gi|113612035|dbj|BAF22413.1| Os07g0655800 [Oryza sativa Japonica Group]	sp|Q6S6W0|GP2_EHV1V	99.4	1e-20	Glycoprotein gp2 OS=Equine herpesvirus 1 (strain V592) GN=71 PE=3 SV=1	YOR054c	73.2	2e-13	COG0452	Phosphopantothenoylcysteine synthetase/decarboxylase	--	--	--	--	--	-	-	GO:0031410//cytoplasmic vesicle
Unigene57032_All	677	52	13	3.1848	0.7497	2.0868	up	2.07e-07	4.03e-06	--	--	--	--	--	--	--	--	--	--	--	--	--	--	--	--	--	--	-	-	-
Unigene67734_All	1956	40	10	0.8479	0.1996	2.0868	up	5.57e-06	8.19e-05	--	--	--	--	--	--	--	--	--	--	--	--	--	--	--	--	--	--	-	-	-
Unigene78897_All	431	32	8	3.0785	0.7247	2.0868	up	5.11e-05	0.000591	--	--	--	--	sp|Q24JP1|ALCS_ASPFU	84.3	2e-16	Protein alcS OS=Neosartorya fumigata (strain ATCC MYA-4609 / Af293 / CBS 101355 / FGSC A1100) GN=alcS PE=3 SV=1	--	--	--	--	--	--	--	--	--	--	-	-	-
Unigene87479_All	611	36	9	2.443	0.5751	2.0868	up	1.68e-05	0.000222	gi|54606728|dbj|BAD66751.1|	204	7e-52	orf764 [Beta vulgaris subsp. vulgaris]	sp|Q9UR07|RTF23_SCHPO	63.2	1e-09	Retrotransposable element Tf2 155 kDa protein type 3 OS=Schizosaccharomyces pombe (strain ATCC 38366 / 972) GN=Tf2-11 PE=4 SV=1	SPAC9.04	63.2	3e-10	COG2801	Transposase and inactivated derivatives	--	--	--	--	--	-	-	-
Unigene87789_All	384	32	8	3.4553	0.8134	2.0868	up	5.11e-05	0.000591	--	--	--	--	--	--	--	--	--	--	--	--	--	--	--	--	--	--	-	-	-
Unigene28307_All	441	2097	527	197.164	46.6552	2.0793	up	1.34e-241	1.33e-238	--	--	--	--	--	--	--	--	--	--	--	--	--	--	--	--	--	--	-	-	-
Unigene33332_All	860	233	59	11.2338	2.6784	2.0684	up	3.55e-28	3.25e-26	--	--	--	--	--	--	--	--	--	--	--	--	--	--	--	--	--	--	-	-	-
Unigene11433_All	496	59	15	4.9322	1.1807	2.0626	up	3.89e-08	8.49e-07	--	--	--	--	--	--	--	--	--	--	--	--	--	--	--	--	--	--	-	-	-
Unigene66311_All	523	59	15	4.6775	1.1197	2.0626	up	3.89e-08	8.49e-07	--	--	--	--	--	--	--	--	--	--	--	--	--	--	--	--	--	--	-	-	-
Unigene10396_All	404	55	14	5.6448	1.3529	2.0609	up	1.16e-07	2.35e-06	gi|297841541|ref|XP_002888652.1|	71.2	4e-12	universal stress protein family protein [Arabidopsis lyrata subsp. lyrata] >gi|297334493|gb|EFH64911.1| universal stress protein family protein [Arabidopsis lyrata subsp. lyrata]	--	--	--	--	--	--	--	--	--	--	--	--	--	--	-	-	-
Unigene85414_All	319	55	14	7.1489	1.7134	2.0609	up	1.16e-07	2.35e-06	--	--	--	--	--	--	--	--	--	--	--	--	--	--	--	--	--	--	-	-	-
Unigene86465_All	507	55	14	4.498	1.0781	2.0608	up	1.16e-07	2.35e-06	--	--	--	--	--	--	--	--	--	--	--	--	--	--	--	--	--	--	-	-	-
Unigene28311_All	1425	856	218	24.9073	5.9727	2.0601	up	1.4e-98	5.19e-96	--	--	--	--	--	--	--	--	--	--	--	--	--	--	--	--	--	--	-	-	-
Unigene61813_All	985	51	13	2.1469	0.5153	2.0588	up	3.45e-07	6.45e-06	gi|15218112|ref|NP_175612.1|	56.6	5e-07	jacalin-like lectin domain-containing protein [Arabidopsis thaliana] >gi|4220464|gb|AAD12691.1| Similar to gb|Y09437 myrosinase binding protein from Brassica napus [Arabidopsis thaliana] >gi|332194625|gb|AEE32746.1| jacalin-like lectin domain-containing protein [Arabidopsis thaliana]	sp|Q54KD5|Y7399_DICDI	73.9	2e-12	P17/29C-like protein DDB_G0287399 OS=Dictyostelium discoideum GN=DDB_G0287399 PE=3 SV=1	--	--	--	--	--	--	--	--	--	--	-	-	-
Unigene49370_All	778	47	12	2.5049	0.6022	2.0564	up	1.03e-06	1.77e-05	--	--	--	--	--	--	--	--	--	--	--	--	--	--	--	--	--	--	-	-	-
Unigene30901_All	854	43	11	2.0877	0.5029	2.0536	up	3.09e-06	4.79e-05	gi|11612171|gb|AAG37438.1|	138	8e-32	seed maturation protein LEA 4 [Glycine canescens]	sp|Q01417|PM1_SOYBN	136	2e-31	18 kDa seed maturation protein OS=Glycine max GN=GMPM1 PE=2 SV=1	--	--	--	--	--	--	--	--	--	--	-	-	-
Unigene70763_All	445	43	11	4.0066	0.9651	2.0536	up	3.09e-06	4.79e-05	gi|32400766|gb|AAP80615.1|AF470354_1	48.9	1e-13	RING-H2 finger protein [Triticum aestivum]	sp|Q9ZT42|RHF2A_ARATH	52	1e-13	E3 ubiquitin-protein ligase RHF2A OS=Arabidopsis thaliana GN=RHF2A PE=2 SV=1	--	--	--	--	--	--	--	--	--	--	GO:0009553//embryo sac development;GO:0007049//cell cycle;GO:0006508//proteolysis	GO:0046872//metal ion binding	GO:0016020//membrane
Unigene47757_All	746	39	10	2.1677	0.5233	2.0505	up	9.3e-06	0.00013	--	--	--	--	--	--	--	--	--	--	--	--	--	--	--	--	--	--	-	-	-
Unigene7508_All	1455	39	10	1.1114	0.2683	2.0505	up	9.3e-06	0.00013	gi|75333632|sp|Q9CAA7.1|PUB42_ARATH	438	1e-121	RecName: Full=Putative U-box domain-containing protein 42; AltName: Full=Plant U-box protein 42	sp|Q9LM76|PUB44_ARATH	225	6e-58	U-box domain-containing protein 44 OS=Arabidopsis thaliana GN=PUB44 PE=1 SV=1	--	--	--	--	--	--	--	--	--	--	-	-	-
Unigene1278_All	688	39	10	2.3504	0.5675	2.0502	up	9.3e-06	0.00013	gi|227202782|dbj|BAH56864.1|	74.3	1e-12	AT2G18670 [Arabidopsis thaliana]	sp|Q9ZV51|ATL56_ARATH	74.3	7e-13	RING-H2 finger protein ATL56 OS=Arabidopsis thaliana GN=ATL56 PE=2 SV=1	ECU07g0330	60.8	2e-09	COG5540	RING-finger-containing ubiquitin ligase	K11982	3e-06	49.3	sbi:SORBI_03g011120	E3 ubiquitin-protein ligase RNF115/126 [EC:6.3.2.19]	-	GO:0005488//binding	-
Unigene35560_All	1424	39	10	1.1356	0.2742	2.0502	up	9.3e-06	0.00013	--	--	--	--	--	--	--	--	--	--	--	--	--	--	--	--	--	--	-	-	-
Unigene75975_All	604	35	9	2.4027	0.5817	2.0463	up	2.81e-05	0.000349	--	--	--	--	--	--	--	--	--	--	--	--	--	--	--	--	--	--	-	-	-
Unigene36343_All	719	35	9	2.0184	0.4887	2.0462	up	2.81e-05	0.000349	--	--	--	--	--	--	--	--	--	--	--	--	--	--	--	--	--	--	-	-	-
Unigene20243_All	337	35	9	4.3063	1.0427	2.0461	up	2.81e-05	0.000349	--	--	--	--	--	--	--	--	--	--	--	--	--	--	--	--	--	--	-	-	-
Unigene87827_All	547	35	9	2.6531	0.6424	2.0461	up	2.81e-05	0.000349	gi|192913038|gb|ACF06627.1|	125	2e-28	60S ribosomal protein L24 [Elaeis guineensis]	sp|Q7SDU2|RL24_NEUCR	232	9e-61	60S ribosomal protein L24 OS=Neurospora crassa GN=rpl-24 PE=3 SV=1	SPAC6G9.09c	187	7e-48	COG2075	Ribosomal protein L24E	K02896	3e-29	125	rcu:RCOM_0840480	large subunit ribosomal protein L24e	-	-	-
Unigene28640_All	876	31	8	1.4673	0.3565	2.0412	up	8.54e-05	0.000931	gi|147790331|emb|CAN61195.1|	67.4	2e-10	hypothetical protein VITISV_028346 [Vitis vinifera]	--	--	--	--	--	--	--	--	--	--	--	--	--	--	-	-	-
Unigene33159_All	599	31	8	2.1459	0.5214	2.0411	up	8.54e-05	0.000931	gi|8778804|gb|AAF79812.1|AC020646_35	56.2	6e-14	T32E20.6 [Arabidopsis thaliana]	--	--	--	--	--	--	--	--	--	--	--	--	--	--	-	-	-
Unigene35136_All	715	31	8	1.7977	0.4368	2.0411	up	8.54e-05	0.000931	gi|297841081|ref|XP_002888422.1|	83.6	2e-15	calcium-binding EF hand family protein [Arabidopsis lyrata subsp. lyrata] >gi|297334263|gb|EFH64681.1| calcium-binding EF hand family protein [Arabidopsis lyrata subsp. lyrata]	--	--	--	--	--	--	--	--	--	--	--	--	--	--	GO:0006091//generation of precursor metabolites and energy	GO:0046872//metal ion binding	GO:0031224//intrinsic to membrane;GO:0043231//intracellular membrane-bounded organelle
Unigene78825_All	329	31	8	3.9069	0.9493	2.0411	up	8.54e-05	0.000931	--	--	--	--	--	--	--	--	--	--	--	--	--	--	--	--	--	--	-	-	-
Unigene78725_All	322	31	8	3.9918	0.97	2.041	up	8.54e-05	0.000931	--	--	--	--	--	--	--	--	--	--	--	--	--	--	--	--	--	--	-	-	-
Unigene21048_All	479	89	23	7.7041	1.8747	2.039	up	1.85e-11	6.09e-10	--	--	--	--	--	--	--	--	--	--	--	--	--	--	--	--	--	--	-	-	-
Unigene1711_All	874	263	68	12.4771	3.0376	2.0383	up	4.89e-31	4.99e-29	--	--	--	--	--	--	--	--	--	--	--	--	--	--	--	--	--	--	-	-	-
Unigene30747_All	733	85	22	4.8082	1.1718	2.0368	up	5.43e-11	1.71e-09	gi|115487460|ref|NP_001066217.1|	62	8e-09	Os12g0160900 [Oryza sativa Japonica Group] >gi|113648724|dbj|BAF29236.1| Os12g0160900 [Oryza sativa Japonica Group]	--	--	--	--	--	--	--	--	--	--	--	--	--	--	-	-	-
Unigene92920_All	591	54	14	3.7886	0.9248	2.0345	up	1.92e-07	3.76e-06	gi|4837733|gb|AAD30661.1|AF085354_1	70.5	2e-13	shrunken seed protein [Arabidopsis thaliana]	sp|Q8S8S1|PEX16_ARATH	70.5	3e-13	Peroxisome biogenesis protein 16 OS=Arabidopsis thaliana GN=PEX16 PE=1 SV=1	--	--	--	--	--	K13335	7e-22	84	pop:POPTR_774323	peroxin-16	GO:0006996//organelle organization;GO:0006631//fatty acid metabolic process;GO:0044092;GO:0019538//protein metabolic process	GO:0004175//endopeptidase activity;GO:0005515//protein binding	GO:0042579//microbody;GO:0031090//organelle membrane
Unigene33594_All	729	46	12	2.6164	0.6427	2.0254	up	1.71e-06	2.81e-05	--	--	--	--	--	--	--	--	--	--	--	--	--	--	--	--	--	--	-	-	-
Unigene47143_All	596	46	12	3.2002	0.7861	2.0254	up	1.71e-06	2.81e-05	gi|110288755|gb|AAP52555.2|	52.8	3e-06	Protease inhibitor/seed storage/LTP family protein [Oryza sativa Japonica Group]	sp|Q01302|CCG6_NEUCR	56.2	1e-07	Clock-controlled protein 6 OS=Neurospora crassa GN=ccg-6 PE=2 SV=2	--	--	--	--	--	--	--	--	--	--	-	-	-
Unigene63017_All	463	46	12	4.1195	1.0119	2.0254	up	1.71e-06	2.81e-05	--	--	--	--	sp|P22151|GRG1_NEUCR	90.9	3e-18	Glucose-repressible gene protein OS=Neurospora crassa GN=grg-1 PE=2 SV=1	--	--	--	--	--	--	--	--	--	--	-	-	-
Unigene51852_All	405	88	23	9.0094	2.2172	2.0227	up	3.05e-11	9.81e-10	--	--	--	--	--	--	--	--	--	--	--	--	--	--	--	--	--	--	-	-	-
Unigene22741_All	438	65	17	6.1533	1.5153	2.0218	up	1.21e-08	2.86e-07	gi|326508144|dbj|BAJ99339.1|	62.4	2e-09	predicted protein [Hordeum vulgare subsp. vulgare]	sp|Q07421|PMA1_AJECA	162	5e-40	Plasma membrane ATPase OS=Ajellomyces capsulata GN=PMA1 PE=3 SV=1	SPAC1071.10c	127	5e-30	COG0474	Cation transport ATPase	--	--	--	--	--	-	-	-
Unigene37102_All	442	65	17	6.0976	1.5016	2.0217	up	1.21e-08	2.86e-07	--	--	--	--	--	--	--	--	--	--	--	--	--	--	--	--	--	--	-	-	-
Unigene82649_All	305	107	28	14.5463	3.5842	2.0209	up	2.31e-13	9.1e-12	--	--	--	--	--	--	--	--	--	--	--	--	--	--	--	--	--	--	-	-	-
Unigene62437_All	538	42	11	3.2369	0.7982	2.0198	up	5.13e-06	7.6e-05	--	--	--	--	--	--	--	--	--	--	--	--	--	--	--	--	--	--	-	-	-
Unigene36396_All	553	42	11	3.1491	0.7766	2.0197	up	5.13e-06	7.6e-05	gi|115474417|ref|NP_001060805.1|	64.3	9e-10	Os08g0108300 [Oryza sativa Japonica Group] >gi|113622774|dbj|BAF22719.1| Os08g0108300 [Oryza sativa Japonica Group]	sp|Q3KSS4|EBNA1_EBVG	61.2	4e-09	Epstein-Barr nuclear antigen 1 OS=Epstein-Barr virus (strain GD1) GN=EBNA1 PE=1 SV=1	XF0818	53.5	2e-07	COG2730	Endoglucanase	K12825	4e-08	55.1	ppp:PHYPADRAFT_174116	splicing factor 3A subunit 1	-	-	-
Unigene68110_All	646	42	11	2.6958	0.6648	2.0197	up	5.13e-06	7.6e-05	--	--	--	--	--	--	--	--	--	--	--	--	--	--	--	--	--	--	-	-	-
Unigene82431_All	246	42	11	7.0792	1.7458	2.0197	up	5.13e-06	7.59e-05	--	--	--	--	--	--	--	--	--	--	--	--	--	--	--	--	--	--	-	-	-
Unigene52387_All	576	137	36	9.862	2.4401	2.0149	up	1.18e-16	6.02e-15	--	--	--	--	--	--	--	--	--	--	--	--	--	--	--	--	--	--	-	-	-
Unigene20044_All	380	38	10	4.1464	1.0274	2.0129	up	1.54e-05	0.000205	gi|302838125|ref|XP_002950621.1|	60.1	8e-09	metalloproteinase, extracellular matrix glycoprotein VMP22 [Volvox carteri f. nagariensis] >gi|300264170|gb|EFJ48367.1| metalloproteinase, extracellular matrix glycoprotein VMP22 [Volvox carteri f. nagariensis]	sp|Q6IN36|WIPF1_RAT	54.3	2e-07	WAS/WASL-interacting protein family member 1 OS=Rattus norvegicus GN=Wipf1 PE=1 SV=2	--	--	--	--	--	--	--	--	--	--	-	-	-
Unigene71908_All	818	38	10	1.9262	0.4773	2.0128	up	1.54e-05	0.000205	--	--	--	--	--	--	--	--	--	--	--	--	--	--	--	--	--	--	-	-	-
Unigene8485_All	710	38	10	2.2192	0.5499	2.0128	up	1.54e-05	0.000205	--	--	--	--	--	--	--	--	--	--	--	--	--	--	--	--	--	--	-	-	-
Unigene54715_All	722	53	14	3.0437	0.757	2.0075	up	3.17e-07	5.97e-06	gi|89953382|gb|ABD83287.1|	198	5e-50	Fgenesh protein 43 [Beta vulgaris]	sp|Q54T49|APT11_DICDI	64.7	6e-10	Acyl-protein thioesterase 1 homolog 1 OS=Dictyostelium discoideum GN=DDB_G0282005 PE=2 SV=1	SPAC8E11.04c	55.5	9e-08	COG0400	Predicted esterase	--	--	--	--	--	-	GO:0016788//hydrolase activity, acting on ester bonds	-
Unigene13528_All	2252	34	9	0.626	0.156	2.0046	up	4.67e-05	0.000548	gi|307136196|gb|ADN34034.1|	95.1	4e-18	gypsy/ty3 element polyprotein [Cucumis melo subsp. melo]	--	--	--	--	--	--	--	--	--	--	--	--	--	--	GO:0009987//cellular process;GO:0044238//primary metabolic process;GO:0043170	GO:0005488//binding	-
Unigene14011_All	690	34	9	2.0431	0.5092	2.0045	up	4.67e-05	0.000548	--	--	--	--	--	--	--	--	--	--	--	--	--	--	--	--	--	--	-	-	-
Unigene82645_All	463	34	9	3.0448	0.7589	2.0044	up	4.67e-05	0.000548	gi|240248438|gb|ACS45396.1|	72	3e-12	myo-inositol oxygenase [Solanum lycopersicum]	sp|Q8L799|MIOX1_ARATH	68.9	1e-11	Inositol oxygenase 1 OS=Arabidopsis thaliana GN=MIOX1 PE=2 SV=1	--	--	--	--	--	K00469	3e-13	71.6	pop:POPTR_418574	inositol oxygenase [EC:1.13.99.1]	GO:0006020//inositol metabolic process	GO:0046914//transition metal ion binding;GO:0016701//oxidoreductase activity, acting on single donors with incorporation of molecular oxygen	GO:0044424//intracellular part
Unigene85019_All	583	34	9	2.4181	0.6027	2.0044	up	4.67e-05	0.000548	gi|15229139|ref|NP_190511.1|	234	7e-61	Got1/Sft2-like vescicle transport-like protein [Arabidopsis thaliana] >gi|15240976|ref|NP_195763.1| Got1/Sft2-like vescicle transport protein [Arabidopsis thaliana] >gi|334187355|ref|NP_001190200.1| Got1/Sft2-like vescicle transport protein [Arabidopsis thaliana] >gi|30102848|gb|AAP21342.1| At3g49420 [Arabidopsis thaliana] >gi|332002959|gb|AED90342.1| Got1/Sft2-like vescicle transport protein [Ar…	sp|Q9Y3E0|GOT1B_HUMAN	137	6e-32	Vesicle transport protein GOT1B OS=Homo sapiens GN=GOLT1B PE=1 SV=1	YMR292w	114	8e-26	COG5120	Membrane protein involved in Golgi transport	--	--	--	--	--	GO:0006810//transport	-	GO:0031410//cytoplasmic vesicle
Unigene11648_All	532	34	9	2.6499	0.6605	2.0043	up	4.67e-05	0.000548	gi|297808305|ref|XP_002872036.1|	181	4e-45	zinc finger family protein [Arabidopsis lyrata subsp. lyrata] >gi|297317873|gb|EFH48295.1| zinc finger family protein [Arabidopsis lyrata subsp. lyrata]	--	--	--	--	--	--	--	--	--	--	--	--	--	--	-	GO:0046914//transition metal ion binding	GO:0044464//cell part
Unigene65060_All	557	68	18	5.062	1.2617	2.0043	up	6.75e-09	1.65e-07	--	--	--	--	--	--	--	--	--	--	--	--	--	--	--	--	--	--	-	-	-
Unigene3936_All	1768	301	80	7.0591	1.7666	1.9985	up	1.96e-34	2.3e-32	--	--	--	--	--	--	--	--	--	--	--	--	--	--	--	--	--	--	-	-	-
Unigene6051_All	637	184	49	11.9769	3.0032	1.9957	up	1.3e-21	8.81e-20	gi|29570524|gb|AAO85278.1|	135	4e-31	germin-like protein Wageningen 1 [Beta vulgaris]	sp|Q6ZBZ2|GL814_ORYSJ	82.8	2e-15	Germin-like protein 8-14 OS=Oryza sativa subsp. japonica GN=GER5 PE=1 SV=1	--	--	--	--	--	--	--	--	--	--	-	GO:0046914//transition metal ion binding	GO:0005576//extracellular region;GO:0031410//cytoplasmic vesicle
Unigene24344_All	526	45	12	3.5473	0.8907	1.9937	up	2.83e-06	4.42e-05	--	--	--	--	--	--	--	--	--	--	--	--	--	--	--	--	--	--	-	-	-
Unigene37013_All	399	60	16	6.2351	1.5656	1.9937	up	5.91e-08	1.25e-06	gi|28416661|gb|AAO42861.1|	130	5e-30	At1g30130 [Arabidopsis thaliana]	--	--	--	--	--	--	--	--	--	--	--	--	--	--	-	-	-
Unigene78290_All	789	45	12	2.3648	0.5938	1.9937	up	2.83e-06	4.42e-05	gi|109628383|gb|ABG34547.1|	374	1e-103	cellulose synthase-like A1 [Pinus taeda]	sp|Q9LZR3|CSLA9_ARATH	360	6e-99	Glucomannan 4-beta-mannosyltransferase 9 OS=Arabidopsis thaliana GN=CSLA9 PE=2 SV=1	--	--	--	--	--	K13680	1e-110	396	vvi:100259738	beta-mannan synthase [EC:2.4.1.32]	GO:0051707//response to other organism;GO:0009292//genetic transfer	GO:0019187//beta-1,4-mannosyltransferase activity	GO:0044464//cell part
Unigene18585_All	1592	116	31	3.0212	0.7602	1.9907	up	4.08e-14	1.72e-12	--	--	--	--	--	--	--	--	--	--	--	--	--	--	--	--	--	--	-	-	-
Unigene27325_All	704	41	11	2.4148	0.61	1.985	up	8.48e-06	0.00012	gi|18400838|ref|NP_566519.1|	155	5e-37	transducin/WD40 domain-containing protein [Arabidopsis thaliana] >gi|11994333|dbj|BAB02292.1| WD-40 repeat protein-like [Arabidopsis thaliana] >gi|25083282|gb|AAN72058.1| expressed protein [Arabidopsis thaliana] >gi|332642181|gb|AEE75702.1| transducin/WD40 domain-containing protein [Arabidopsis thaliana]	sp|Q54LT8|STRAP_DICDI	73.2	2e-12	Serine-threonine kinase receptor-associated protein OS=Dictyostelium discoideum GN=strap PE=3 SV=1	--	--	--	--	--	K13137	8e-40	160	rcu:RCOM_0826280	serine-threonine kinase receptor-associated protein	-	GO:0016772//transferase activity, transferring phosphorus-containing groups;GO:0004871//signal transducer activity	GO:0031461//cullin-RING ubiquitin ligase complex
Unigene44216_All	973	63	17	2.6847	0.6821	1.9767	up	3.28e-08	7.24e-07	gi|115449465|ref|NP_001048473.1|	110	3e-23	Os02g0811000 [Oryza sativa Japonica Group] >gi|113538004|dbj|BAF10387.1| Os02g0811000 [Oryza sativa Japonica Group] >gi|270309088|dbj|BAI52984.1| G1-like6 protein [Oryza sativa Japonica Group]	--	--	--	--	--	--	--	--	--	--	--	--	--	--	-	-	GO:0043231//intracellular membrane-bounded organelle
Unigene36034_All	266	37	10	5.7675	1.4677	1.9744	up	2.55e-05	0.00032	--	--	--	--	--	--	--	--	--	--	--	--	--	--	--	--	--	--	-	-	-
Unigene8350_All	359	37	10	4.2734	1.0875	1.9744	up	2.55e-05	0.00032	--	--	--	--	--	--	--	--	--	--	--	--	--	--	--	--	--	--	-	-	-
Unigene133757_All	402	37	10	3.8163	0.9712	1.9743	up	2.55e-05	0.00032	--	--	--	--	--	--	--	--	--	--	--	--	--	--	--	--	--	--	-	-	-
Unigene34892_All	631	74	20	4.8626	1.2375	1.9743	up	2.09e-09	5.43e-08	--	--	--	--	--	--	--	--	--	--	--	--	--	--	--	--	--	--	-	-	-
Unigene59873_All	330	37	10	4.649	1.1831	1.9743	up	2.55e-05	0.00032	--	--	--	--	--	--	--	--	--	--	--	--	--	--	--	--	--	--	-	-	-
Unigene70889_All	779	48	13	2.5549	0.6515	1.9714	up	1.56e-06	2.57e-05	--	--	--	--	--	--	--	--	--	--	--	--	--	--	--	--	--	--	-	-	-
Unigene21360_All	775	44	12	2.3541	0.6045	1.9614	up	4.65e-06	6.93e-05	gi|12322504|gb|AAG51258.1|AC025782_3	92	8e-18	Ty1/copia-element polyprotein [Arabidopsis thaliana]	--	--	--	--	--	--	--	--	--	--	--	--	--	--	-	-	-
Unigene20738_All	246	33	9	5.5622	1.4284	1.9613	up	7.72e-05	0.000856	--	--	--	--	--	--	--	--	--	--	--	--	--	--	--	--	--	--	-	-	-
Unigene34775_All	347	33	9	3.9432	1.0126	1.9613	up	7.72e-05	0.000856	--	--	--	--	--	--	--	--	--	--	--	--	--	--	--	--	--	--	-	-	-
Unigene39826_All	459	33	9	2.981	0.7655	1.9613	up	7.72e-05	0.000856	--	--	--	--	--	--	--	--	--	--	--	--	--	--	--	--	--	--	-	-	-
Unigene82434_All	395	77	21	8.0828	2.0756	1.9613	up	1.16e-09	3.12e-08	--	--	--	--	--	--	--	--	--	--	--	--	--	--	--	--	--	--	-	-	-
Unigene1305_All	1289	33	9	1.0615	0.2726	1.9612	up	7.72e-05	0.000856	gi|15233592|ref|NP_193862.1|	197	2e-49	uncharacterized protein [Arabidopsis thaliana] >gi|48310105|gb|AAT41754.1| At4g21310 [Arabidopsis thaliana] >gi|50198867|gb|AAT70460.1| At4g21310 [Arabidopsis thaliana] >gi|332659038|gb|AEE84438.1| uncharacterized protein [Arabidopsis thaliana]	--	--	--	--	--	--	--	--	--	--	--	--	--	--	-	-	GO:0031410//cytoplasmic vesicle
Unigene62641_All	590	33	9	2.3192	0.5956	1.9612	up	7.72e-05	0.000856	gi|297818370|ref|XP_002877068.1|	336	1e-91	rock-N-rollers [Arabidopsis lyrata subsp. lyrata] >gi|297322906|gb|EFH53327.1| rock-N-rollers [Arabidopsis lyrata subsp. lyrata]	sp|A2RUV5|HFM1_XENTR	159	2e-38	Probable ATP-dependent DNA helicase HFM1 OS=Xenopus tropicalis GN=hfm1 PE=2 SV=1	SPAC9.03c	113	2e-25	COG1204	Superfamily II helicase	K01529	9e-31	130	olu:OSTLU_31874	[EC:3.6.1.-]	GO:0022402//cell cycle process;GO:0006310//DNA recombination	GO:0004386//helicase activity;GO:0042623//ATPase activity, coupled;GO:0032559//adenyl ribonucleotide binding	-
Unigene39765_All	620	95	26	6.3533	1.6372	1.9563	up	1.42e-11	4.73e-10	gi|2654206|gb|AAC49998.1|	85.1	6e-16	cold acclimation protein [Spinacia oleracea] >gi|2661094|gb|AAC49999.1| cold acclimation protein [Spinacia oleracea]	sp|Q04980|LTI65_ARATH	60.1	1e-08	Low-temperature-induced 65 kDa protein OS=Arabidopsis thaliana GN=LTI65 PE=2 SV=2	--	--	--	--	--	--	--	--	--	--	GO:0009725//response to hormone stimulus;GO:0006950//response to stress;GO:0009628//response to abiotic stimulus	-	-
Unigene14445_All	651	62	17	3.9489	1.0195	1.9536	up	5.37e-08	1.15e-06	--	--	--	--	--	--	--	--	--	--	--	--	--	--	--	--	--	--	-	-	-
Unigene20036_All	672	40	11	2.4681	0.6391	1.9493	up	1.39e-05	0.000187	gi|50083056|gb|AAT70180.1|	62	6e-09	MSH4 [Arabidopsis thaliana]	--	--	--	--	--	--	--	--	--	K08740	9e-17	84.3	vvi:100254854	DNA mismatch repair protein MSH4	GO:0006281//DNA repair	GO:0032559//adenyl ribonucleotide binding;GO:0003690//double-stranded DNA binding	-
Unigene35030_All	435	40	11	3.8128	0.9873	1.9493	up	1.39e-05	0.000187	--	--	--	--	--	--	--	--	--	--	--	--	--	--	--	--	--	--	-	-	-
Unigene89345_All	268	40	11	6.1886	1.6025	1.9493	up	1.39e-05	0.000187	--	--	--	--	--	--	--	--	--	--	--	--	--	--	--	--	--	--	-	-	-
Unigene5597_All	887	40	11	1.8698	0.4842	1.9492	up	1.39e-05	0.000187	gi|297612178|ref|NP_001068267.2|	153	3e-36	Os11g0613900 [Oryza sativa Japonica Group] >gi|77552015|gb|ABA94812.1| hAT family dimerisation domain containing protein [Oryza sativa Japonica Group] >gi|255680263|dbj|BAF28630.2| Os11g0613900 [Oryza sativa Japonica Group]	sp|O75132|ZBED4_HUMAN	60.8	1e-08	Zinc finger BED domain-containing protein 4 OS=Homo sapiens GN=ZBED4 PE=1 SV=2	--	--	--	--	--	--	--	--	--	--	-	-	-
Unigene4542_All	830	69	19	3.447	0.8937	1.9475	up	1.01e-08	2.4e-07	gi|15241598|ref|NP_196452.1|	160	1e-38	GEM-like protein 4 [Arabidopsis thaliana] >gi|75172412|sp|Q9FTA0.1|GEML4_ARATH RecName: Full=GEM-like protein 4 >gi|332003905|gb|AED91288.1| GEM-like protein 4 [Arabidopsis thaliana]	sp|Q9FTA0|GEML4_ARATH	160	8e-39	GEM-like protein 4 OS=Arabidopsis thaliana GN=At5g08350 PE=2 SV=1	--	--	--	--	--	--	--	--	--	--	-	-	-
Unigene36752_All	348	76	21	9.0553	2.356	1.9424	up	1.89e-09	4.95e-08	--	--	--	--	--	--	--	--	--	--	--	--	--	--	--	--	--	--	-	-	-
Unigene35864_All	209	36	10	7.1421	1.868	1.9349	up	4.2e-05	0.000497	--	--	--	--	--	--	--	--	--	--	--	--	--	--	--	--	--	--	-	-	-
Unigene47396_All	602	36	10	2.4796	0.6485	1.9349	up	4.2e-05	0.000497	gi|226509906|ref|NP_001152569.1|	294	5e-79	60S ribosomal protein L9 [Zea mays] >gi|195657601|gb|ACG48268.1| 60S ribosomal protein L9 [Zea mays]	sp|P51401|RL9B_YEAST	214	3e-55	60S ribosomal protein L9-B OS=Saccharomyces cerevisiae (strain ATCC 204508 / S288c) GN=RPL9B PE=1 SV=1	YNL067w	214	8e-56	COG0097	Ribosomal protein L6P/L9E	K02940	4e-80	294	zma:100286209	large subunit ribosomal protein L9e	-	-	-
Unigene64510_All	420	36	10	3.554	0.9296	1.9348	up	4.2e-05	0.000497	gi|298710137|emb|CBJ31849.1|	100	7e-21	peptidyl-prolyl cis-trans isomerase, FKBP-type [Ectocarpus siliculosus]	sp|Q6M981|FKB1B_NEUCR	143	3e-34	Peptidyl-prolyl cis-trans isomerase fkr-3 OS=Neurospora crassa GN=fkr-3 PE=3 SV=1	SPBC839.17c	106	1e-23	COG0545	FKBP-type peptidyl-prolyl cis-trans isomerases 1	--	--	--	--	--	-	-	-
Unigene74871_All	268	36	10	5.5697	1.4568	1.9348	up	4.2e-05	0.000497	gi|74272607|gb|ABA01099.1|	100	6e-21	40S ribosomal protein S3 [Chlamydomonas incerta]	sp|P05750|RS3_YEAST	105	9e-23	40S ribosomal protein S3 OS=Saccharomyces cerevisiae (strain ATCC 204508 / S288c) GN=RPS3 PE=1 SV=5	YNL178w	105	2e-23	COG0092	Ribosomal protein S3	K02985	1e-26	115	zma:100382976	small subunit ribosomal protein S3e	-	-	-
Unigene87440_All	444	36	10	3.3619	0.8793	1.9348	up	4.2e-05	0.000497	gi|121501704|gb|ABM55245.1|	92.8	1e-35	transposon-like protein [Beta vulgaris]	--	--	--	--	--	--	--	--	--	--	--	--	--	--	-	-	-
Unigene67762_All	1107	36	10	1.3484	0.3527	1.9347	up	4.2e-05	0.000497	gi|42566089|ref|NP_191610.3|	124	5e-44	3-hydroxyisobutyryl-CoA hydrolase-like protein 1 [Arabidopsis thaliana] >gi|75252290|sp|Q5XF59.1|HIBC4_ARATH RecName: Full=3-hydroxyisobutyryl-CoA hydrolase-like protein 1, mitochondrial; Flags: Precursor >gi|53749124|gb|AAU90047.1| At3g60510 [Arabidopsis thaliana] >gi|55167904|gb|AAV43784.1| At3g60510 [Arabidopsis thaliana] >gi|110738262|dbj|BAF01060.1| enoyl-CoA hydratase like protein [Arabidop…	sp|Q5XF59|HIBC4_ARATH	124	2e-44	3-hydroxyisobutyryl-CoA hydrolase-like protein 1, mitochondrial OS=Arabidopsis thaliana GN=At3g60510 PE=2 SV=1	SMb20752	46.6	2e-08	COG1024	Enoyl-CoA hydratase/carnithine racemase	--	--	--	--	--	-	GO:0016836//hydro-lyase activity	GO:0043231//intracellular membrane-bounded organelle
Unigene33908_All	341	43	12	5.2286	1.3739	1.9281	up	7.62e-06	0.000109	--	--	--	--	--	--	--	--	--	--	--	--	--	--	--	--	--	--	-	-	-
Unigene34477_All	466	43	12	3.826	1.0054	1.9281	up	7.62e-06	0.000109	--	--	--	--	--	--	--	--	--	--	--	--	--	--	--	--	--	--	-	-	-
Unigene38490_All	281	43	12	6.345	1.6673	1.9281	up	7.62e-06	0.000109	--	--	--	--	--	--	--	--	--	--	--	--	--	--	--	--	--	--	-	-	-
Unigene33508_All	1298	304	85	9.7111	2.5567	1.9254	up	3.72e-33	4.16e-31	gi|224076743|ref|XP_002304990.1|	55.8	1e-06	predicted protein [Populus trichocarpa] >gi|222847954|gb|EEE85501.1| predicted protein [Populus trichocarpa]	--	--	--	--	--	--	--	--	--	--	--	--	--	--	-	-	-
Unigene15491_All	1067	82	23	3.1865	0.8416	1.9208	up	5.81e-10	1.62e-08	--	--	--	--	--	--	--	--	--	--	--	--	--	--	--	--	--	--	-	-	-
Unigene47032_All	460	320	90	28.8443	7.6386	1.9169	up	1.28e-34	1.51e-32	--	--	--	--	--	--	--	--	--	--	--	--	--	--	--	--	--	--	-	-	-
Unigene21406_All	672	71	20	4.3808	1.162	1.9146	up	9.05e-09	2.17e-07	gi|158828138|gb|ABW81017.1|	122	1e-42	gag-pol polymerase [Arabidopsis lyrata subsp. lyrata]	--	--	--	--	--	--	--	--	--	--	--	--	--	--	-	-	-
Unigene38014_All	477	39	11	3.3901	0.9003	1.9129	up	2.28e-05	0.000291	--	--	--	--	--	--	--	--	--	--	--	--	--	--	--	--	--	--	-	-	-
Unigene65177_All	496	39	11	3.2602	0.8658	1.9129	up	2.28e-05	0.000291	--	--	--	--	--	--	--	--	--	--	--	--	--	--	--	--	--	--	-	-	-
Unigene71960_All	1010	170	48	6.979	1.8554	1.9113	up	4.83e-19	2.86e-17	--	--	--	--	--	--	--	--	--	--	--	--	--	--	--	--	--	--	-	-	-
Unigene84847_All	620	432	122	28.8908	7.6824	1.911	up	5.59e-46	9.4e-44	gi|15239857|ref|NP_196767.1|	74.7	8e-13	self-incompatibility S1 family protein [Arabidopsis thaliana] >gi|67633800|gb|AAY78824.1| self-incompatibility protein-related [Arabidopsis thaliana] >gi|332004374|gb|AED91757.1| self-incompatibility S1 family protein [Arabidopsis thaliana]	--	--	--	--	--	--	--	--	--	--	--	--	--	--	-	-	-
Unigene60996_All	506	46	13	3.7694	1.003	1.91	up	4.17e-06	6.28e-05	--	--	--	--	--	--	--	--	--	--	--	--	--	--	--	--	--	--	-	-	-
Unigene6104_All	750	46	13	2.5431	0.6767	1.91	up	4.17e-06	6.28e-05	--	--	--	--	--	--	--	--	--	--	--	--	--	--	--	--	--	--	-	-	-
Unigene20527_All	465	60	17	5.3502	1.4273	1.9063	up	1.43e-07	2.84e-06	--	--	--	--	--	--	--	--	--	--	--	--	--	--	--	--	--	--	-	-	-
Unigene53848_All	671	60	17	3.7076	0.9891	1.9063	up	1.43e-07	2.84e-06	--	--	--	--	--	--	--	--	--	--	--	--	--	--	--	--	--	--	-	-	-
Unigene5952_All	629	60	17	3.9552	1.0552	1.9062	up	1.43e-07	2.84e-06	gi|304322998|ref|YP_003795536.1|	55.5	5e-07	beta' subunit of RNA polymerase [Floydiella terrestris] >gi|270048197|gb|ACZ58492.1| beta' subunit of RNA polymerase [Floydiella terrestris]	sp|A5E4P1|PXR1_LODEL	53.1	1e-06	Protein PXR1 OS=Lodderomyces elongisporus (strain ATCC 11503 / CBS 2605 / JCM 1781 / NBRC 1676 / NRRL YB-4239) GN=PXR1 PE=3 SV=1	--	--	--	--	--	--	--	--	--	--	-	-	-
Unigene62481_All	403	67	19	6.8935	1.8407	1.905	up	2.66e-08	5.97e-07	--	--	--	--	--	--	--	--	--	--	--	--	--	--	--	--	--	--	-	-	-
Unigene19911_All	403	63	18	6.4819	1.7438	1.8942	up	7.84e-08	1.63e-06	gi|15228715|ref|NP_191784.1|	146	7e-35	ubiquitin-40S ribosomal protein S27a-3 [Arabidopsis thaliana] >gi|302393706|sp|P59233.2|R27AC_ARATH RecName: Full=Ubiquitin-40S ribosomal protein S27a-3; Contains: RecName: Full=Ubiquitin; Contains: RecName: Full=40S ribosomal protein S27a-3; Flags: Precursor >gi|166934|gb|AAA32906.1| ubiquitin extension protein (UBQ5) [Arabidopsis thaliana] >gi|6899935|emb|CAB71885.1| ubiquitin extension protein…	sp|P14799|RS27A_NEUCR	180	3e-45	Ubiquitin-40S ribosomal protein S27a OS=Neurospora crassa GN=ubi-3 PE=1 SV=4	YLR167w_1	81.3	5e-16	COG5272	Ubiquitin	K02977	5e-36	146	ath:AT3G62250	small subunit ribosomal protein S27Ae	GO:0019941//modification-dependent protein catabolic process;GO:0016567//protein ubiquitination;GO:0010467//gene expression	GO:0043169//cation binding;GO:0005198//structural molecule activity	GO:0043231//intracellular membrane-bounded organelle;GO:0015935//small ribosomal subunit
Unigene56853_All	690	35	10	2.1032	0.5658	1.8942	up	6.87e-05	0.00077	--	--	--	--	--	--	--	--	--	--	--	--	--	--	--	--	--	--	-	-	-
Unigene65521_All	267	42	12	6.5224	1.7547	1.8942	up	1.24e-05	0.000169	gi|226510502|ref|NP_001141021.1|	82	2e-15	hypothetical protein LOC100273100 [Zea mays] >gi|194702226|gb|ACF85197.1| unknown [Zea mays]	sp|P37211|ATPA_NEUCR	69.3	7e-12	ATP synthase subunit alpha, mitochondrial OS=Neurospora crassa GN=atp-1 PE=3 SV=1	--	--	--	--	--	--	--	--	--	--	GO:0015986//ATP synthesis coupled proton transport	GO:0015078//hydrogen ion transmembrane transporter activity;GO:0019829//cation-transporting ATPase activity;GO:0032559//adenyl ribonucleotide binding	GO:0033178//proton-transporting two-sector ATPase complex, catalytic domain
Unigene75510_All	253	49	14	8.0305	2.1604	1.8942	up	2.28e-06	3.63e-05	--	--	--	--	--	--	--	--	--	--	--	--	--	--	--	--	--	--	-	-	-
Unigene4902_All	503	70	20	5.7703	1.5524	1.8941	up	1.47e-08	3.42e-07	--	--	--	--	--	--	--	--	--	--	--	--	--	--	--	--	--	--	-	-	-
Unigene90038_All	423	35	10	3.4308	0.923	1.8941	up	6.87e-05	0.00077	--	--	--	--	--	--	--	--	--	--	--	--	--	--	--	--	--	--	-	-	-
Unigene21380_All	1168	35	10	1.2425	0.3343	1.894	up	6.87e-05	0.00077	gi|66841323|dbj|BAD99219.1|	176	7e-43	polypeptide with a gag-like domain [Petunia x hybrida]	sp|P10978|POLX_TOBAC	57.8	2e-07	Retrovirus-related Pol polyprotein from transposon TNT 1-94 OS=Nicotiana tabacum PE=2 SV=1	--	--	--	--	--	--	--	--	--	--	-	-	-
Unigene47787_All	606	108	31	7.3896	1.9972	1.8875	up	1.98e-12	7.13e-11	gi|13443598|emb|CAA07551.2|	91.7	6e-18	glycine-rich protein 1 [Cicer arietinum]	sp|Q09134|GRPA_MEDFA	89.4	2e-17	Abscisic acid and environmental stress-inducible protein OS=Medicago falcata PE=2 SV=1	XF0818	57.4	2e-08	COG2730	Endoglucanase	K12890	4e-13	72	cre:CHLREDRAFT_195849	splicing factor, arginine/serine-rich 1/9	-	-	-
Unigene9796_All	731	73	21	4.1407	1.1216	1.8843	up	8.09e-09	1.96e-07	gi|149900509|gb|ABR32185.1|	122	6e-27	peptide transporter [Hakea actites]	sp|Q0WP01|PTR9_ARATH	118	4e-26	Probable peptide/nitrate transporter At1g22540 OS=Arabidopsis thaliana GN=At1g22540 PE=2 SV=1	ECU11g1050	50.8	2e-06	COG3104	Dipeptide/tripeptide permease	K03305	8e-17	84.7	pop:POPTR_752070	proton-dependent oligopeptide transporter, POT family	GO:0015833//peptide transport	-	GO:0016020//membrane
Unigene14822_All	512	52	15	4.2112	1.1438	1.8804	up	1.25e-06	2.1e-05	--	--	--	--	--	--	--	--	--	--	--	--	--	--	--	--	--	--	-	-	-
Unigene60035_All	759	52	15	2.8407	0.7716	1.8803	up	1.25e-06	2.1e-05	gi|1709620|sp|P52589.1|PDI_WHEAT	151	8e-36	RecName: Full=Protein disulfide-isomerase; Short=PDI; Flags: Precursor >gi|508975|gb|AAA19660.1| protein disulfide isomerase [Triticum aestivum] >gi|1094851|prf||2106410A protein disulfide isomerase	sp|P55059|PDI_HUMIN	356	8e-98	Protein disulfide-isomerase OS=Humicola insolens PE=1 SV=1	SPAC1F5.02	202	6e-52	COG0526	Thiol-disulfide isomerase and thioredoxins	K01829	5e-38	155	cme:CMC180C	protein disulfide-isomerase [EC:5.3.4.1]	-	GO:0003824//catalytic activity	GO:0044444//cytoplasmic part;GO:0043229//intracellular organelle
Unigene9482_All	587	45	13	3.1786	0.8646	1.8783	up	6.77e-06	9.75e-05	--	--	--	--	--	--	--	--	--	--	--	--	--	--	--	--	--	--	-	-	-
Unigene43156_All	662	38	11	2.3801	0.6487	1.8754	up	3.72e-05	0.000449	--	--	--	--	--	--	--	--	--	--	--	--	--	--	--	--	--	--	-	-	-
Unigene82001_All	441	38	11	3.5728	0.9738	1.8754	up	3.72e-05	0.000449	--	--	--	--	--	--	--	--	--	--	--	--	--	--	--	--	--	--	-	-	-
Unigene91862_All	494	38	11	3.1895	0.8693	1.8754	up	3.72e-05	0.000449	--	--	--	--	--	--	--	--	--	--	--	--	--	--	--	--	--	--	-	-	-
Unigene51589_All	286	38	11	5.5092	1.5016	1.8753	up	3.72e-05	0.000449	--	--	--	--	--	--	--	--	--	--	--	--	--	--	--	--	--	--	-	-	-
Unigene39816_All	857	131	38	6.3381	1.7311	1.8724	up	1.24e-14	5.45e-13	gi|19919844|gb|AAM08405.1|AF490588_1	385	1e-106	Na+/H+ exchanger 4 [Arabidopsis thaliana]	sp|Q8S397|NHX4_ARATH	385	2e-106	Sodium/hydrogen exchanger 4 OS=Arabidopsis thaliana GN=NHX4 PE=2 SV=2	SPAC15A10.06	124	2e-28	COG0025	NhaP-type Na+/H+ and K+/H+ antiporters	K03316	7e-29	125	olu:OSTLU_1871	monovalent cation:H+ antiporter, CPA1 family	GO:0055067;GO:0030001//metal ion transport	GO:0005451//monovalent cation:hydrogen antiporter activity	GO:0031224//intrinsic to membrane
Unigene32380_All	884	62	18	2.9081	0.795	1.8711	up	1.27e-07	2.55e-06	gi|124359291|gb|ABD28426.2|	110	1e-33	RNA-directed DNA polymerase (Reverse transcriptase) [Medicago truncatula]	--	--	--	--	--	--	--	--	--	--	--	--	--	--	-	-	-
Unigene64930_All	498	124	36	10.3243	2.8223	1.8711	up	6.45e-14	2.67e-12	--	--	--	--	--	--	--	--	--	--	--	--	--	--	--	--	--	--	-	-	-
Unigene72068_All	1155	48	14	1.7232	0.4732	1.8646	up	3.69e-06	5.63e-05	--	--	--	--	--	--	--	--	--	--	--	--	--	--	--	--	--	--	-	-	-
Unigene14201_All	1161	72	21	2.5714	0.7062	1.8644	up	1.3e-08	3.07e-07	gi|83701143|gb|ABC41134.1|	221	1e-56	RING-box protein [Arachis hypogaea]	sp|Q940X7|RBX1A_ARATH	218	9e-56	RING-box protein 1a OS=Arabidopsis thaliana GN=RBX1A PE=1 SV=1	SPAC23H4.18c	186	5e-47	COG5194	Component of SCF ubiquitin ligase and anaphase-promoting complex	K03868	4e-59	226	pop:POPTR_836177	RING-box protein 1	GO:0032446//protein modification by small protein conjugation	GO:0046914//transition metal ion binding	GO:0031461//cullin-RING ubiquitin ligase complex
Unigene19678_All	489	48	14	4.0701	1.1178	1.8644	up	3.69e-06	5.63e-05	--	--	--	--	--	--	--	--	--	--	--	--	--	--	--	--	--	--	-	-	-
Unigene45458_All	818	48	14	2.4331	0.6682	1.8644	up	3.69e-06	5.63e-05	--	--	--	--	--	--	--	--	--	--	--	--	--	--	--	--	--	--	-	-	-
Unigene40952_All	664	89	26	5.5576	1.5287	1.8622	up	2.56e-10	7.46e-09	gi|87162846|gb|ABD28641.1|	159	2e-38	Oxysterol-binding protein [Medicago truncatula]	sp|Q9SVZ9|ORP4A_ARATH	135	2e-31	Oxysterol-binding protein-related protein 4A OS=Arabidopsis thaliana GN=ORP4A PE=2 SV=2	--	--	--	--	--	--	--	--	--	--	-	-	-
Unigene103825_All	429	65	19	6.2824	1.7291	1.8613	up	6.96e-08	1.46e-06	gi|30695063|ref|NP_199498.2|	124	3e-28	RNA recognition motif-containing protein [Arabidopsis thaliana] >gi|38564314|gb|AAR23736.1| At5g46870 [Arabidopsis thaliana] >gi|45592926|gb|AAS68117.1| At5g46870 [Arabidopsis thaliana] >gi|332008055|gb|AED95438.1| RNA recognition motif-containing protein [Arabidopsis thaliana]	--	--	--	--	--	--	--	--	--	--	--	--	--	--	GO:0008152//metabolic process	GO:0005488//binding;GO:0003824//catalytic activity	-
Unigene35968_All	721	41	12	2.3579	0.6498	1.8594	up	2.02e-05	0.00026	--	--	--	--	--	--	--	--	--	--	--	--	--	--	--	--	--	--	-	-	-
Unigene6343_All	498	41	12	3.4137	0.9408	1.8594	up	2.02e-05	0.00026	--	--	--	--	--	--	--	--	--	--	--	--	--	--	--	--	--	--	-	-	-
Unigene72653_All	647	41	12	2.6275	0.7241	1.8594	up	2.02e-05	0.00026	gi|186510546|ref|NP_189530.2|	103	2e-21	Ankyrin repeat family protein [Arabidopsis thaliana] >gi|332643979|gb|AEE77500.1| Ankyrin repeat family protein [Arabidopsis thaliana]	--	--	--	--	--	--	--	--	--	--	--	--	--	--	-	GO:0046872//metal ion binding;GO:0003676//nucleic acid binding	-
Unigene8869_All	739	58	17	3.2543	0.8981	1.8574	up	3.73e-07	6.93e-06	gi|83778968|gb|ABB86962.1|	80.1	3e-14	cytosolic NADP-malic enzyme [Malus x domestica]	sp|P34105|MAOX_POPTR	64.3	8e-10	NADP-dependent malic enzyme OS=Populus trichocarpa PE=2 SV=3	--	--	--	--	--	K00029	4e-11	65.9	rcu:RCOM_1489870	malate dehydrogenase (oxaloacetate-decarboxylating)(NADP+) [EC:1.1.1.40]	GO:0043648//dicarboxylic acid metabolic process	GO:0004470//malic enzyme activity;GO:0000166//nucleotide binding;GO:0043169//cation binding	GO:0044424//intracellular part
Unigene71705_All	969	85	25	3.6372	1.0073	1.8523	up	7.47e-10	2.05e-08	--	--	--	--	--	--	--	--	--	--	--	--	--	--	--	--	--	--	-	-	-
Unigene80573_All	1005	367	108	15.1415	4.1955	1.8516	up	9.93e-38	1.29e-35	gi|18405086|ref|NP_564669.1|	182	6e-45	Glycoprotein membrane precursor GPI-anchored [Arabidopsis thaliana] >gi|3776578|gb|AAC64895.1| ESTs gb|F13915 and gb|F13916 come from this gene [Arabidopsis thaliana] >gi|332195036|gb|AEE33157.1| Glycoprotein membrane precursor GPI-anchored [Arabidopsis thaliana]	sp|Q84MC0|UGPI4_ARATH	153	2e-36	Uncharacterized GPI-anchored protein At3g06035 OS=Arabidopsis thaliana GN=At3g06035 PE=2 SV=1	--	--	--	--	--	--	--	--	--	--	-	-	GO:0031224//intrinsic to membrane
Unigene68908_All	938	44	13	1.945	0.5411	1.8458	up	1.1e-05	0.00015	gi|71040673|gb|AAZ20285.1|	256	4e-67	ubiquitin fusion protein [Arachis hypogaea] >gi|192910738|gb|ACF06477.1| ubiquitin fusion protein [Elaeis guineensis] >gi|284433784|gb|ADB85098.1| ubiquitin C variant [Jatropha curcas] >gi|330318561|gb|AEC10952.1| ubiquitin fusion protein [Camellia sinensis]	sp|P49636|RL40_NICSY	254	5e-67	Ubiquitin-60S ribosomal protein L40 OS=Nicotiana sylvestris GN=UBICEP52-7 PE=2 SV=2	YLL039c	148	1e-35	COG5272	Ubiquitin	K02927	3e-68	256	vvi:100246002	large subunit ribosomal protein L40e	-	-	-
Unigene86520_All	313	54	16	7.1535	1.9957	1.8418	up	1.1e-06	1.87e-05	--	--	--	--	--	--	--	--	--	--	--	--	--	--	--	--	--	--	-	-	-
Unigene43010_All	871	81	24	3.856	1.0758	1.8417	up	2.18e-09	5.65e-08	gi|79313976|ref|NP_001030791.1|	77.8	2e-13	uncharacterized protein [Arabidopsis thaliana] >gi|222424331|dbj|BAH20122.1| AT3G28760 [Arabidopsis thaliana] >gi|332643967|gb|AEE77488.1| uncharacterized protein [Arabidopsis thaliana]	sp|O26680|DHQS_METTH	64.3	1e-09	3-dehydroquinate synthase OS=Methanobacterium thermoautotrophicum (strain Delta H) GN=MTH_580 PE=3 SV=2	MTH580	64.3	3e-10	COG1465	Predicted alternative 3-dehydroquinate synthase	--	--	--	--	--	-	GO:0005488//binding	GO:0043231//intracellular membrane-bounded organelle
Unigene86551_All	410	54	16	5.4611	1.5236	1.8417	up	1.1e-06	1.87e-05	--	--	--	--	--	--	--	--	--	--	--	--	--	--	--	--	--	--	-	-	-
Unigene45492_All	581	2710	804	193.402	54.0266	1.8399	up	6.3e-265	6.98e-262	gi|3913645|sp|P81456.1|DEF1_VICFA	74.3	9e-13	RecName: Full=Defensin-like protein 1; AltName: Full=Fabatin-1	sp|P81456|DEF1_VICFA	74.3	5e-13	Defensin-like protein 1 OS=Vicia faba PE=1 SV=1	--	--	--	--	--	--	--	--	--	--	GO:0006952//defense response	-	-
Unigene5575_All	720	310	92	17.8524	4.9887	1.8394	up	7.6e-32	7.99e-30	--	--	--	--	--	--	--	--	--	--	--	--	--	--	--	--	--	--	-	-	-
Unigene32160_All	524	64	19	5.0643	1.4156	1.8389	up	1.12e-07	2.28e-06	--	--	--	--	--	--	--	--	--	--	--	--	--	--	--	--	--	--	-	-	-
Unigene18740_All	827	101	30	5.0639	1.4163	1.8381	up	2.38e-11	7.76e-10	gi|226491348|ref|NP_001142253.1|	234	8e-61	hypothetical protein LOC100274422 [Zea mays] >gi|194707854|gb|ACF88011.1| unknown [Zea mays]	sp|P0C956|GEL4_ASPFU	186	2e-46	1,3-beta-glucanosyltransferase gel4 OS=Neosartorya fumigata (strain ATCC MYA-4609 / Af293 / CBS 101355 / FGSC A1100) GN=gel4 PE=3 SV=1	--	--	--	--	--	--	--	--	--	--	-	-	-
Unigene19625_All	537	37	11	2.8569	0.7997	1.8369	up	6.04e-05	0.000686	--	--	--	--	--	--	--	--	--	--	--	--	--	--	--	--	--	--	-	-	-
Unigene42573_All	935	37	11	1.6408	0.4593	1.8369	up	6.04e-05	0.000686	gi|164430548|gb|ABY55588.1|	59.3	7e-08	1-aminocyclopropane-1-carboxylate synthase [Rosa hybrid cultivar]	sp|Q9LQ10|1A110_ARATH	54.3	1e-06	Probable aminotransferase ACS10 OS=Arabidopsis thaliana GN=ACS10 PE=2 SV=1	--	--	--	--	--	--	--	--	--	--	GO:0006555//methionine metabolic process	GO:0008483//transaminase activity;GO:0016846//carbon-sulfur lyase activity	-
Unigene5535_All	336	37	11	4.5659	1.2781	1.8369	up	6.04e-05	0.000686	--	--	--	--	--	--	--	--	--	--	--	--	--	--	--	--	--	--	-	-	-
Unigene32342_All	997	37	11	1.5388	0.4308	1.8367	up	6.04e-05	0.000686	--	--	--	--	--	--	--	--	--	--	--	--	--	--	--	--	--	--	-	-	-
Unigene13548_All	1279	94	28	3.0474	0.8547	1.8341	up	1.25e-10	3.76e-09	--	--	--	--	--	--	--	--	--	--	--	--	--	--	--	--	--	--	-	-	-
Unigene76105_All	605	47	14	3.2211	0.9034	1.8341	up	5.96e-06	8.7e-05	gi|159488703|ref|XP_001702342.1|	206	2e-52	ribosomal protein S7, component of cytosolic 80S ribosome and 40S small subunit [Chlamydomonas reinhardtii] >gi|158271136|gb|EDO96962.1| ribosomal protein S7 [Chlamydomonas reinhardtii]	sp|O43105|RS7_NEUCR	325	1e-88	40S ribosomal protein S7 OS=Neurospora crassa GN=rps-7 PE=3 SV=2	--	--	--	--	--	K02993	2e-53	206	cre:CHLREDRAFT_179706	small subunit ribosomal protein S7e	-	GO:0003723//RNA binding	GO:0005840//ribosome;GO:0009536//plastid
Unigene7302_All	467	57	17	5.0609	1.4212	1.8323	up	6.01e-07	1.07e-05	--	--	--	--	--	--	--	--	--	--	--	--	--	--	--	--	--	--	-	-	-
Unigene57534_All	664	57	17	3.5594	0.9996	1.8322	up	6.01e-07	1.07e-05	gi|30678929|ref|NP_849590.1|	76.3	3e-13	uncharacterized protein [Arabidopsis thaliana] >gi|332189598|gb|AEE27719.1| uncharacterized protein [Arabidopsis thaliana]	--	--	--	--	--	--	--	--	--	--	--	--	--	--	-	-	-
Unigene2489_All	1560	87	26	2.3124	0.6507	1.8293	up	6.59e-10	1.82e-08	gi|186492055|ref|NP_001117518.1|	365	1e-100	1,4-dihydroxy-2-naphthoate octaprenyltransferase [Arabidopsis thaliana] >gi|327488385|sp|Q0WUA3.2|MENA_ARATH RecName: Full=1,4-dihydroxy-2-naphthoate polyprenyltransferase, chloroplastic; AltName: Full=1,4-dihydroxy-2-naphthoate phytyltransferase; AltName: Full=Protein ABERRANT CHLOROPLAST DEVELOPMENT 4; AltName: Full=menA-like protein; Short=AtMENA; Flags: Precursor >gi|332195581|gb|AEE33702.1| …	sp|Q0WUA3|MENA_ARATH	365	4e-100	1,4-dihydroxy-2-naphthoate polyprenyltransferase, chloroplastic OS=Arabidopsis thaliana GN=ABC4 PE=1 SV=2	slr1518	180	5e-45	COG1575	1,4-dihydroxy-2-naphthoate octaprenyltransferase	K02548	3e-112	403	vvi:100256517	1,4-dihydroxy-2-naphthoate octaprenyltransferase [EC:2.5.1.74]	-	GO:0016740//transferase activity	GO:0016020//membrane;GO:0043231//intracellular membrane-bounded organelle
Unigene34890_All	547	277	83	20.9971	5.9241	1.8255	up	2.41e-28	2.23e-26	--	--	--	--	--	--	--	--	--	--	--	--	--	--	--	--	--	--	-	-	-
Unigene20293_All	805	40	12	2.0603	0.582	1.8238	up	3.26e-05	0.0004	--	--	--	--	--	--	--	--	--	--	--	--	--	--	--	--	--	--	-	-	-
Unigene35175_All	650	90	27	5.7411	1.6217	1.8238	up	3.63e-10	1.04e-08	gi|297802494|ref|XP_002869131.1|	234	7e-61	40S ribosomal protein S3A [Arabidopsis lyrata subsp. lyrata] >gi|297314967|gb|EFH45390.1| 40S ribosomal protein S3A [Arabidopsis lyrata subsp. lyrata]	sp|C7YTD6|RS3A_NECH7	325	1e-88	40S ribosomal protein S1 OS=Nectria haematococca (strain 77-13-4 / FGSC 9596 / MPVI) GN=RPS1 PE=3 SV=1	YML063w	243	2e-64	COG1890	Ribosomal protein S3AE	K02984	5e-62	234	ath:AT4G34670	small subunit ribosomal protein S3Ae	GO:0010467//gene expression	GO:0005198//structural molecule activity	GO:0015935//small ribosomal subunit;GO:0016020//membrane;GO:0030312//external encapsulating structure;GO:0009536//plastid;GO:0031981//nuclear lumen
Unigene3746_All	810	80	24	4.0952	1.1568	1.8238	up	3.48e-09	8.81e-08	gi|15221264|ref|NP_177590.1|	134	1e-30	transcription factor bHLH135 [Arabidopsis thaliana] >gi|75308937|sp|Q9CA64.1|BH135_ARATH RecName: Full=Transcription factor bHLH135; AltName: Full=Basic helix-loop-helix protein 135; Short=AtbHLH135; Short=bHLH 135; AltName: Full=Protein ACTIVATION-TAGGED BRI1 SUPPRESSOR 1; Short=ATBS1; AltName: Full=Protein PACLOBUTRAZOL RESISTANCE 1; AltName: Full=Protein TARGET OF MOOPTEROS 7; AltName: Full=Tr…	sp|Q9CA64|BH135_ARATH	134	7e-31	Transcription factor bHLH135 OS=Arabidopsis thaliana GN=BHLH135 PE=1 SV=1	--	--	--	--	--	--	--	--	--	--	GO:0010468//regulation of gene expression;GO:0009314//response to radiation	-	GO:0009536//plastid
Unigene45281_All	1430	170	51	4.9292	1.3924	1.8238	up	5.83e-18	3.23e-16	gi|9758329|dbj|BAB08885.1|	193	6e-48	retroelement pol polyprotein-like [Arabidopsis thaliana]	--	--	--	--	--	--	--	--	--	--	--	--	--	--	GO:0008152//metabolic process	GO:0005488//binding	-
Unigene46497_All	332	40	12	4.9956	1.4111	1.8238	up	3.26e-05	0.0004	--	--	--	--	--	--	--	--	--	--	--	--	--	--	--	--	--	--	-	-	-
Unigene52842_All	515	40	12	3.2205	0.9097	1.8238	up	3.26e-05	0.0004	gi|297820930|ref|XP_002878348.1|	243	7e-64	40S ribosomal protein S13 [Arabidopsis lyrata subsp. lyrata] >gi|297324186|gb|EFH54607.1| 40S ribosomal protein S13 [Arabidopsis lyrata subsp. lyrata]	sp|P33192|RS13_CANMA	251	2e-66	40S ribosomal protein S13 OS=Candida maltosa GN=RPS13 PE=3 SV=2	YDR064w	247	6e-66	COG0184	Ribosomal protein S15P/S13E	K02953	1e-64	242	ath:AT3G60770	small subunit ribosomal protein S13e	GO:0033205//cytokinesis during cell cycle;GO:0009887//organ morphogenesis;GO:0010467//gene expression;GO:0000904//cell morphogenesis involved in differentiation	GO:0005198//structural molecule activity	GO:0030312//external encapsulating structure;GO:0015935//small ribosomal subunit;GO:0031981//nuclear lumen;GO:0009536//plastid
Unigene5690_All	622	40	12	2.6665	0.7532	1.8238	up	3.26e-05	0.0004	gi|297746266|emb|CBI16322.3|	58.2	8e-08	unnamed protein product [Vitis vinifera]	--	--	--	--	--	--	--	--	--	--	--	--	--	--	-	-	-
Unigene77287_All	460	110	33	9.9152	2.8008	1.8238	up	4.01e-12	1.4e-10	--	--	--	--	--	--	--	--	--	--	--	--	--	--	--	--	--	--	-	-	-
Unigene35580_All	505	73	22	5.9938	1.7008	1.8173	up	1.85e-08	4.24e-07	gi|334187045|ref|NP_001154279.2|	151	3e-36	down-regulated in metastasis (DRIM) domain-containing protein [Arabidopsis thaliana] >gi|332660439|gb|AEE85839.1| down-regulated in metastasis (DRIM) domain-containing protein [Arabidopsis thaliana]	--	--	--	--	--	--	--	--	--	--	--	--	--	--	-	-	GO:0043231//intracellular membrane-bounded organelle
Unigene73879_All	313	53	16	7.021	1.9957	1.8148	up	1.77e-06	2.9e-05	--	--	--	--	--	--	--	--	--	--	--	--	--	--	--	--	--	--	-	-	-
Unigene30333_All	603	106	32	7.2888	2.0719	1.8147	up	1.16e-11	3.89e-10	--	--	--	--	--	--	--	--	--	--	--	--	--	--	--	--	--	--	-	-	-
Unigene77892_All	1010	56	17	2.299	0.6571	1.8068	up	9.64e-07	1.66e-05	--	--	--	--	--	--	--	--	--	--	--	--	--	--	--	--	--	--	-	-	-
Unigene19390_All	553	46	14	3.4491	0.9884	1.8031	up	9.59e-06	0.000133	gi|297812115|ref|XP_002873941.1|	189	2e-47	armadillo/beta-catenin repeat family protein [Arabidopsis lyrata subsp. lyrata] >gi|297319778|gb|EFH50200.1| armadillo/beta-catenin repeat family protein [Arabidopsis lyrata subsp. lyrata]	sp|B9DHT4|ARIA_ARATH	188	2e-47	ARM REPEAT PROTEIN INTERACTING WITH ABF2 OS=Arabidopsis thaliana GN=ARIA PE=1 SV=2	--	--	--	--	--	--	--	--	--	--	-	-	-
Unigene115564_All	396	46	14	4.8165	1.3803	1.803	up	9.59e-06	0.000133	gi|121501704|gb|ABM55245.1|	177	4e-44	transposon-like protein [Beta vulgaris]	--	--	--	--	--	--	--	--	--	--	--	--	--	--	-	-	-
Unigene38527_All	309	46	14	6.1726	1.7689	1.803	up	9.59e-06	0.000133	--	--	--	--	--	--	--	--	--	--	--	--	--	--	--	--	--	--	-	-	-
Unigene71611_All	524	46	14	3.6399	1.0431	1.803	up	9.59e-06	0.000133	--	--	--	--	--	--	--	--	--	--	--	--	--	--	--	--	--	--	-	-	-
Unigene15747_All	757	82	25	4.4914	1.2894	1.8005	up	3.06e-09	7.79e-08	--	--	--	--	--	--	--	--	--	--	--	--	--	--	--	--	--	--	-	-	-
Unigene56132_All	1574	59	18	1.5542	0.4465	1.7994	up	5.26e-07	9.49e-06	gi|8843739|dbj|BAA97287.1|	57.8	4e-07	retroelement pol polyprotein-like [Arabidopsis thaliana]	--	--	--	--	--	--	--	--	--	--	--	--	--	--	-	-	-
Unigene38838_All	384	72	22	7.7744	2.2368	1.7973	up	2.95e-08	6.56e-07	--	--	--	--	--	--	--	--	--	--	--	--	--	--	--	--	--	--	-	-	-
Unigene39073_All	529	72	22	5.6434	1.6237	1.7973	up	2.95e-08	6.56e-07	--	--	--	--	sp|O74383|YNV8_SCHPO	57.4	5e-08	Uncharacterized protein C3H7.08c OS=Schizosaccharomyces pombe (strain ATCC 38366 / 972) GN=SPBC3H7.08c PE=2 SV=1	--	--	--	--	--	--	--	--	--	--	-	-	-
Unigene4989_All	680	556	170	33.9027	9.7604	1.7964	up	4.56e-54	8.98e-52	--	--	--	--	--	--	--	--	--	--	--	--	--	--	--	--	--	--	-	-	-
Unigene124646_All	297	49	15	6.8408	1.9718	1.7947	up	5.21e-06	7.7e-05	--	--	--	--	--	--	--	--	--	--	--	--	--	--	--	--	--	--	-	-	-
Unigene62953_All	763	88	27	4.7822	1.3816	1.7913	up	9.24e-10	2.51e-08	gi|148646851|gb|ABR01233.1|	280	1e-74	60S ribosomal protein L10a [Chlorella vulgaris] >gi|148646859|gb|ABR01237.1| 60S ribosomal protein L10a [Chlorella vulgaris] >gi|148646863|gb|ABR01239.1| 60S ribosomal protein L10a [Chlorella vulgaris]	sp|Q7RZS0|RL10A_NEUCR	390	7e-108	60S ribosomal protein L10a OS=Neurospora crassa GN=rpl-10a PE=3 SV=1	SPCC1183.08c	364	7e-101	COG0081	Ribosomal protein L1	K02865	8e-76	280	ath:AT5G22440	large subunit ribosomal protein L10Ae	-	-	-
Unigene42065_All	1192	39	12	1.3566	0.393	1.7874	up	5.25e-05	0.000605	--	--	--	--	--	--	--	--	--	--	--	--	--	--	--	--	--	--	-	-	-
Unigene46474_All	685	39	12	2.3607	0.6839	1.7874	up	5.25e-05	0.000605	gi|304322998|ref|YP_003795536.1|	63.9	2e-09	beta' subunit of RNA polymerase [Floydiella terrestris] >gi|270048197|gb|ACZ58492.1| beta' subunit of RNA polymerase [Floydiella terrestris]	sp|Q869E1|DNLI1_DICDI	57	1e-07	DNA ligase 1 OS=Dictyostelium discoideum GN=lig1 PE=3 SV=1	--	--	--	--	--	K11984	1e-07	54.3	ppp:PHYPADRAFT_233757	U4/U6.U5 tri-snRNP-associated protein 1	-	-	-
Unigene1085_All	521	39	12	3.1038	0.8992	1.7873	up	5.25e-05	0.000606	--	--	--	--	--	--	--	--	--	--	--	--	--	--	--	--	--	--	-	-	-
Unigene39256_All	422	39	12	3.832	1.1102	1.7873	up	5.25e-05	0.000605	gi|30683983|ref|NP_180437.2|	62.8	1e-09	uncharacterized protein [Arabidopsis thaliana] >gi|330253066|gb|AEC08160.1| uncharacterized protein [Arabidopsis thaliana]	--	--	--	--	--	--	--	--	--	--	--	--	--	--	-	-	-
Unigene52757_All	310	39	12	5.2164	1.5113	1.7873	up	5.25e-05	0.000605	--	--	--	--	--	--	--	--	--	--	--	--	--	--	--	--	--	--	-	-	-
Unigene18534_All	884	39	12	1.8293	0.53	1.7872	up	5.25e-05	0.000606	--	--	--	--	--	--	--	--	--	--	--	--	--	--	--	--	--	--	-	-	-
Unigene27266_All	491	39	12	3.2934	0.9542	1.7872	up	5.25e-05	0.000606	gi|297741525|emb|CBI32657.3|	50.8	7e-06	unnamed protein product [Vitis vinifera]	--	--	--	--	--	--	--	--	--	--	--	--	--	--	-	-	-
Unigene33475_All	662	185	57	11.5873	3.3616	1.7853	up	6.77e-19	3.97e-17	--	--	--	--	--	--	--	--	--	--	--	--	--	--	--	--	--	--	-	-	-
Unigene30884_All	1119	55	17	2.038	0.5931	1.7808	up	1.54e-06	2.55e-05	gi|124359981|gb|ABN07997.1|	60.5	4e-08	contains similarity to reverse trancriptase , related [Medicago truncatula]	--	--	--	--	--	--	--	--	--	--	--	--	--	--	-	-	-
Unigene28567_All	592	42	13	2.9417	0.8573	1.7788	up	2.84e-05	0.000352	gi|56118085|gb|AAV73918.1|	97.1	1e-19	calmodulin binding heat shock protein [Gossypium hirsutum]	--	--	--	--	--	--	--	--	--	--	--	--	--	--	GO:0006629//lipid metabolic process	GO:0004091//carboxylesterase activity	-
Unigene48202_All	786	42	13	2.2156	0.6457	1.7788	up	2.84e-05	0.000352	gi|224142031|ref|XP_002324363.1|	84.7	1e-15	glutamate-gated kainate-type ion channel receptor subunit GluR5 [Populus trichocarpa] >gi|222865797|gb|EEF02928.1| glutamate-gated kainate-type ion channel receptor subunit GluR5 [Populus trichocarpa]	sp|Q7XJL2|GLR31_ARATH	79.3	3e-14	Glutamate receptor 3.1 OS=Arabidopsis thaliana GN=GLR3.1 PE=2 SV=2	--	--	--	--	--	K05387	3e-16	83.2	osa:4347123	glutamate receptor, ionotropic, other eukaryote	-	-	-
Unigene72328_All	496	42	13	3.511	1.0233	1.7787	up	2.84e-05	0.000352	gi|224053985|ref|XP_002298071.1|	139	1e-32	RNA polymerase IV subunit [Populus trichocarpa] >gi|222845329|gb|EEE82876.1| RNA polymerase IV subunit [Populus trichocarpa]	sp|Q9LQ02|NRPD1_ARATH	124	2e-28	DNA-directed RNA polymerase D subunit 1 OS=Arabidopsis thaliana GN=NRPD1 PE=1 SV=1	PAE0666	60.8	1e-09	COG0086	DNA-directed RNA polymerase, beta' subunit/160 kD subunit	K03006	9e-14	73.6	osa:4328330	DNA-directed RNA polymerase II subunit A [EC:2.7.7.6]	-	-	-
Unigene19828_All	497	71	22	5.9234	1.7282	1.7772	up	4.7e-08	1.01e-06	gi|300175335|emb|CBK20646.2|	51.2	6e-06	unnamed protein product [Blastocystis hominis]	sp|P22151|GRG1_NEUCR	89.4	1e-17	Glucose-repressible gene protein OS=Neurospora crassa GN=grg-1 PE=2 SV=1	--	--	--	--	--	--	--	--	--	--	-	-	-
Unigene8614_All	423	71	22	6.9596	2.0305	1.7772	up	4.7e-08	1.01e-06	--	--	--	--	--	--	--	--	--	--	--	--	--	--	--	--	--	--	-	-	-
Unigene25845_All	935	58	18	2.5721	0.7516	1.7749	up	8.4e-07	1.47e-05	gi|116309010|emb|CAH66127.1|	73.9	3e-12	OSIGBa0135L04.1 [Oryza sativa Indica Group]	--	--	--	--	--	--	--	--	--	K07466	2e-08	57.4	cre:CHLREDRAFT_205634	replication factor A1	-	-	-
Unigene32818_All	643	116	36	7.4802	2.1858	1.7749	up	2.71e-12	9.61e-11	gi|18399803|ref|NP_565518.1|	104	1e-21	uncharacterized protein [Arabidopsis thaliana] >gi|11692848|gb|AAG40027.1|AF324676_1 At2g21820 [Arabidopsis thaliana] >gi|4417276|gb|AAD20401.1| expressed protein [Arabidopsis thaliana] >gi|330252132|gb|AEC07226.1| uncharacterized protein [Arabidopsis thaliana]	--	--	--	--	--	--	--	--	--	--	--	--	--	--	-	-	-
Unigene53654_All	1328	45	14	1.405	0.4116	1.7713	up	1.53e-05	0.000204	gi|227438239|gb|ACP30609.1|	62	5e-16	disease resistance protein [Brassica rapa subsp. pekinensis]	--	--	--	--	--	--	--	--	--	--	--	--	--	--	-	-	-
Unigene28916_All	992	141	44	5.8935	1.7317	1.7669	up	1.47e-14	6.47e-13	--	--	--	--	--	--	--	--	--	--	--	--	--	--	--	--	--	--	-	-	-
Unigene15887_All	829	48	15	2.4008	0.7064	1.765	up	8.32e-06	0.000118	gi|164564727|dbj|BAF98210.1|	147	1e-34	CM0216.210.nc [Lotus japonicus]	--	--	--	--	--	--	--	--	--	--	--	--	--	--	-	-	-
Unigene74655_All	537	48	15	3.7063	1.0905	1.765	up	8.32e-06	0.000118	--	--	--	--	--	--	--	--	--	--	--	--	--	--	--	--	--	--	-	-	-
Unigene129941_All	376	48	15	5.2932	1.5575	1.7649	up	8.32e-06	0.000118	--	--	--	--	--	--	--	--	--	--	--	--	--	--	--	--	--	--	-	-	-
Unigene69669_All	404	48	15	4.9264	1.4496	1.7649	up	8.32e-06	0.000118	--	--	--	--	--	--	--	--	--	--	--	--	--	--	--	--	--	--	-	-	-
Unigene40277_All	855	64	20	3.1037	0.9133	1.7648	up	2.5e-07	4.78e-06	gi|115445371|ref|NP_001046465.1|	150	3e-35	Os02g0255700 [Oryza sativa Japonica Group] >gi|113535996|dbj|BAF08379.1| Os02g0255700 [Oryza sativa Japonica Group]	--	--	--	--	--	--	--	--	--	--	--	--	--	--	-	-	-
Unigene33729_All	365	51	16	5.7936	1.7114	1.7593	up	4.51e-06	6.75e-05	--	--	--	--	--	--	--	--	--	--	--	--	--	--	--	--	--	--	-	-	-
Unigene7584_All	989	51	16	2.1382	0.6316	1.7593	up	4.51e-06	6.74e-05	gi|109676352|gb|ABG37658.1|	91.7	2e-31	integrase [Populus trichocarpa]	--	--	--	--	--	--	--	--	--	--	--	--	--	--	GO:0006259//DNA metabolic process	GO:0003676//nucleic acid binding	-
Unigene56911_All	574	51	16	3.6841	1.0883	1.7592	up	4.51e-06	6.75e-05	gi|297821989|ref|XP_002878877.1|	71.6	7e-19	holocarboxylase synthetase 1 [Arabidopsis lyrata subsp. lyrata] >gi|297324716|gb|EFH55136.1| holocarboxylase synthetase 1 [Arabidopsis lyrata subsp. lyrata]	--	--	--	--	--	--	--	--	--	--	--	--	--	--	GO:0043412	GO:0003824//catalytic activity	-
Unigene74053_All	1284	51	16	1.6469	0.4865	1.7592	up	4.51e-06	6.74e-05	gi|79314581|ref|NP_001030827.1|	93.6	6e-18	uncharacterized protein [Arabidopsis thaliana] >gi|44681360|gb|AAS47620.1| At3g47630 [Arabidopsis thaliana] >gi|56381935|gb|AAV85686.1| At3g47630 [Arabidopsis thaliana] >gi|332644789|gb|AEE78310.1| uncharacterized protein [Arabidopsis thaliana]	--	--	--	--	--	--	--	--	--	--	--	--	--	--	-	-	-
Unigene60492_All	364	121	38	13.7833	4.0758	1.7578	up	1.3e-12	4.78e-11	gi|22331206|ref|NP_683579.1|	55.5	2e-07	uncharacterized protein [Arabidopsis thaliana] >gi|332642848|gb|AEE76369.1| uncharacterized protein [Arabidopsis thaliana]	--	--	--	--	--	--	--	--	--	--	--	--	--	--	-	-	-
Unigene9791_All	510	140	44	11.3822	3.3683	1.7567	up	2.32e-14	1e-12	gi|186517638|ref|NP_001119144.1|	100	1e-20	40S ribosomal protein S25-4 [Arabidopsis thaliana] >gi|332661637|gb|AEE87037.1| 40S ribosomal protein S25-4 [Arabidopsis thaliana]	sp|Q7SC06|RS25_NEUCR	147	4e-35	40S ribosomal protein S25 OS=Neurospora crassa GN=rps-25 PE=3 SV=1	SPBC3D6.15	110	1e-24	COG4901	Ribosomal protein S25	K02975	1e-21	100	ath:AT4G39200	small subunit ribosomal protein S25e	GO:0010467//gene expression	-	GO:0015935//small ribosomal subunit;GO:0016020//membrane;GO:0009536//plastid;GO:0031981//nuclear lumen
Unigene80327_All	547	54	17	4.0933	1.2134	1.7542	up	2.45e-06	3.89e-05	gi|254971801|gb|ACT98136.1|	51.6	8e-09	TNP1 [Glycine max]	--	--	--	--	--	--	--	--	--	--	--	--	--	--	-	-	-
Unigene121803_All	454	38	12	3.4705	1.0319	1.7498	up	8.4e-05	0.000916	gi|42566075|ref|NP_191544.2|	97.8	4e-20	polygalacturonase [Arabidopsis thaliana] >gi|53749142|gb|AAU90056.1| At3g59850 [Arabidopsis thaliana] >gi|55167900|gb|AAV43782.1| At3g59850 [Arabidopsis thaliana] >gi|332646457|gb|AEE79978.1| polygalacturonase [Arabidopsis thaliana]	sp|O22818|PGLR6_ARATH	94.4	2e-19	Probable polygalacturonase At2g43860 OS=Arabidopsis thaliana GN=At2g43860 PE=2 SV=1	--	--	--	--	--	K01184	4e-21	97.8	ath:AT3G59850	polygalacturonase [EC:3.2.1.15]	-	-	-
Unigene30332_All	468	114	36	10.1001	3.0032	1.7498	up	6.76e-12	2.32e-10	--	--	--	--	--	--	--	--	--	--	--	--	--	--	--	--	--	--	-	-	-
Unigene3879_All	1294	114	36	3.6529	1.0862	1.7498	up	6.76e-12	2.32e-10	gi|66841323|dbj|BAD99219.1|	134	5e-40	polypeptide with a gag-like domain [Petunia x hybrida]	--	--	--	--	--	--	--	--	--	--	--	--	--	--	-	-	-
Unigene44078_All	720	38	12	2.1884	0.6507	1.7498	up	8.4e-05	0.000916	gi|42567657|ref|NP_196142.3|	197	1e-49	U-box domain-containing protein 62 [Arabidopsis thaliana] >gi|75120710|sp|Q6DBN5.1|PUB62_ARATH RecName: Full=U-box domain-containing protein 62; AltName: Full=Plant U-box protein 62 >gi|50198810|gb|AAT70438.1| At5g05230 [Arabidopsis thaliana] >gi|53828605|gb|AAU94412.1| At5g05230 [Arabidopsis thaliana] >gi|332003461|gb|AED90844.1| U-box domain-containing protein 62 [Arabidopsis thaliana]	sp|Q6DBN5|PUB62_ARATH	197	8e-50	U-box domain-containing protein 62 OS=Arabidopsis thaliana GN=PUB62 PE=2 SV=1	--	--	--	--	--	--	--	--	--	--	GO:0032446//protein modification by small protein conjugation	GO:0019787//small conjugating protein ligase activity	GO:0043234//protein complex
Unigene6966_All	366	38	12	4.305	1.2801	1.7498	up	8.4e-05	0.000916	--	--	--	--	--	--	--	--	--	--	--	--	--	--	--	--	--	--	-	-	-
Unigene74159_All	407	57	18	5.807	1.7267	1.7498	up	1.33e-06	2.24e-05	--	--	--	--	--	--	--	--	--	--	--	--	--	--	--	--	--	--	-	-	-
Unigene81598_All	479	38	12	3.2894	0.9781	1.7498	up	8.4e-05	0.000916	--	--	--	--	--	--	--	--	--	--	--	--	--	--	--	--	--	--	-	-	-
Unigene56135_All	860	38	12	1.8321	0.5448	1.7497	up	8.4e-05	0.000916	gi|302398543|gb|ADL36566.1|	80.5	3e-14	ABI3L domain class transcription factor [Malus x domestica]	sp|Q6Z3U3|Y7797_ORYSJ	77.4	1e-13	B3 domain-containing protein Os07g0679700 OS=Oryza sativa subsp. japonica GN=Os07g0679700 PE=2 SV=1	--	--	--	--	--	--	--	--	--	--	-	-	-
Unigene56506_All	778	57	18	3.0378	0.9033	1.7497	up	1.33e-06	2.24e-05	gi|302829262|ref|XP_002946198.1|	74.3	2e-12	hypothetical protein VOLCADRAFT_86229 [Volvox carteri f. nagariensis] >gi|300269013|gb|EFJ53193.1| hypothetical protein VOLCADRAFT_86229 [Volvox carteri f. nagariensis]	sp|P24499|ATP6_TRYBB	53.1	2e-06	ATP synthase subunit a OS=Trypanosoma brucei brucei GN=ATP6 PE=2 SV=1	--	--	--	--	--	--	--	--	--	--	-	-	-
Unigene78573_All	575	158	50	11.3935	3.3949	1.7468	up	6.6e-16	3.19e-14	--	--	--	--	--	--	--	--	--	--	--	--	--	--	--	--	--	--	-	-	-
Unigene59120_All	855	60	19	2.9097	0.8676	1.7458	up	7.27e-07	1.28e-05	gi|87241403|gb|ABD33261.1|	67.4	2e-10	RNA-directed DNA polymerase (Reverse transcriptase) [Medicago truncatula]	--	--	--	--	--	--	--	--	--	--	--	--	--	--	-	-	-
Unigene54209_All	1270	41	13	1.3386	0.3996	1.7441	up	4.53e-05	0.000532	--	--	--	--	--	--	--	--	--	--	--	--	--	--	--	--	--	--	-	-	-
Unigene31330_All	1176	123	39	4.3368	1.2947	1.744	up	1.13e-12	4.17e-11	gi|124507403|gb|ABN13680.1|	462	1e-129	glutathione S-transferase [Salicornia brachiata]	sp|Q06398|GSTU6_ORYSJ	226	2e-58	Probable glutathione S-transferase GSTU6 OS=Oryza sativa subsp. japonica GN=GSTU6 PE=2 SV=2	NMB1953	66.6	8e-11	COG0625	Glutathione S-transferase	--	--	--	--	--	-	-	-
Unigene46175_All	494	41	13	3.4413	1.0274	1.744	up	4.53e-05	0.000532	gi|116308850|emb|CAH65987.1|	72	2e-14	H1005F08.16 [Oryza sativa Indica Group]	--	--	--	--	--	--	--	--	--	--	--	--	--	--	-	GO:0005488//binding	-
Unigene6547_All	432	328	104	31.4817	9.3989	1.7439	up	2.53e-31	2.62e-29	gi|109676372|gb|ABG37668.1|	80.1	5e-21	gag protein [Populus trichocarpa]	--	--	--	--	--	--	--	--	--	--	--	--	--	--	GO:0006260//DNA replication;GO:0006351//transcription, DNA-dependent	GO:0046914//transition metal ion binding;GO:0003676//nucleic acid binding;GO:0034061	-
Unigene67908_All	794	63	20	3.2899	0.9834	1.7422	up	3.96e-07	7.3e-06	--	--	--	--	--	--	--	--	--	--	--	--	--	--	--	--	--	--	-	-	-
Unigene14405_All	1017	44	14	1.7939	0.5374	1.739	up	2.44e-05	0.000309	gi|297834580|ref|XP_002885172.1|	370	1e-101	DEAD-box ATP-dependent RNA helicase 13 [Arabidopsis lyrata subsp. lyrata] >gi|297331012|gb|EFH61431.1| DEAD-box ATP-dependent RNA helicase 13 [Arabidopsis lyrata subsp. lyrata]	sp|A3AVH5|RH13_ORYSJ	363	1e-99	DEAD-box ATP-dependent RNA helicase 13 OS=Oryza sativa subsp. japonica GN=Os04g0510400 PE=2 SV=2	YBR142w	139	8e-33	COG0513	Superfamily II DNA and RNA helicases	--	--	--	--	--	-	GO:0017111//nucleoside-triphosphatase activity;GO:0000166//nucleotide binding	GO:0043231//intracellular membrane-bounded organelle
Unigene17868_All	556	44	14	3.2813	0.9831	1.7389	up	2.44e-05	0.000309	--	--	--	--	--	--	--	--	--	--	--	--	--	--	--	--	--	--	-	-	-
Unigene19811_All	1306	44	14	1.3969	0.4185	1.7389	up	2.44e-05	0.000309	gi|224103363|ref|XP_002334060.1|	385	1e-106	cytochrome P450 [Populus trichocarpa] >gi|222869629|gb|EEF06760.1| cytochrome P450 [Populus trichocarpa]	sp|P93147|C81E1_GLYEC	301	7e-81	Isoflavone 2'-hydroxylase OS=Glycyrrhiza echinata GN=CYP81E1 PE=1 SV=2	BH0579	79	2e-14	COG2124	Cytochrome P450	K00517	6e-82	302	ath:AT4G37370	[EC:1.14.-.-]	-	GO:0046914//transition metal ion binding;GO:0016491//oxidoreductase activity	-
Unigene1233_All	1402	75	24	2.2181	0.6683	1.7308	up	3.53e-08	7.74e-07	gi|84578865|dbj|BAE72875.1|	92.4	1e-17	Cinnamic acid 4-hydroxylase [Verbena x hybrida]	sp|Q43054|TCMO_POPKI	86.3	5e-16	Trans-cinnamate 4-monooxygenase OS=Populus kitakamiensis GN=CYP73A16 PE=2 SV=1	--	--	--	--	--	K00487	3e-17	87.4	sbi:SORBI_03g038160	trans-cinnamate 4-monooxygenase [EC:1.14.13.11]	GO:0008152//metabolic process	GO:0016709//oxidoreductase activity, acting on paired donors, with incorporation or reduction of molecular oxygen, NADH or NADPH as one donor, and incorporation of one atom of oxygen;GO:0005506//iron ion binding	-
Unigene57377_All	1710	78	25	1.8913	0.5708	1.7283	up	1.93e-08	4.41e-07	--	--	--	--	--	--	--	--	--	--	--	--	--	--	--	--	--	--	-	-	-
Unigene560_All	1445	131	42	3.759	1.1348	1.7279	up	2.98e-13	1.16e-11	gi|34581773|gb|AAQ76042.1|	95.5	2e-18	signal recognition particle receptor protein [Cucumis sativus]	sp|Q54ZR7|SRPR_DICDI	63.9	3e-09	Signal recognition particle receptor subunit alpha OS=Dictyostelium discoideum GN=srpr PE=3 SV=1	ECU10g0170	60.1	9e-09	COG0552	Signal recognition particle GTPase	K13431	1e-19	95.5	rcu:RCOM_0623540	signal recognition particle receptor subunit alpha	GO:0006613//cotranslational protein targeting to membrane	GO:0017111//nucleoside-triphosphatase activity;GO:0003723//RNA binding;GO:0043021//ribonucleoprotein binding;GO:0004871//signal transducer activity;GO:0032561//guanyl ribonucleotide binding	GO:0048500//signal recognition particle;GO:0030867//rough endoplasmic reticulum membrane
Unigene80009_All	375	53	17	5.8602	1.7699	1.7273	up	3.89e-06	5.9e-05	--	--	--	--	--	--	--	--	--	--	--	--	--	--	--	--	--	--	-	-	-
Unigene80896_All	395	56	18	5.8784	1.7791	1.7243	up	2.11e-06	3.4e-05	--	--	--	--	--	--	--	--	--	--	--	--	--	--	--	--	--	--	-	-	-
Unigene80887_All	636	56	18	3.6509	1.105	1.7242	up	2.11e-06	3.4e-05	--	--	--	--	--	--	--	--	--	--	--	--	--	--	--	--	--	--	-	-	-
Unigene30764_All	741	214	69	11.9747	3.6355	1.7198	up	1.34e-20	8.58e-19	--	--	--	--	--	--	--	--	--	--	--	--	--	--	--	--	--	--	-	-	-
Unigene28917_All	952	247	80	10.7579	3.2808	1.7133	up	2.01e-23	1.5e-21	gi|297841541|ref|XP_002888652.1|	145	6e-34	universal stress protein family protein [Arabidopsis lyrata subsp. lyrata] >gi|297334493|gb|EFH64911.1| universal stress protein family protein [Arabidopsis lyrata subsp. lyrata]	sp|Q8LGG8|USPAL_ARATH	73.2	3e-12	Universal stress protein A-like protein OS=Arabidopsis thaliana GN=At3g01520 PE=1 SV=2	BS_yxiE	65.5	1e-10	COG0589	Universal stress protein UspA and related nucleotide-binding proteins	--	--	--	--	--	-	-	-
Unigene47557_All	836	71	23	3.5214	1.0741	1.713	up	1.02e-07	2.09e-06	gi|8843739|dbj|BAA97287.1|	102	6e-21	retroelement pol polyprotein-like [Arabidopsis thaliana]	--	--	--	--	--	--	--	--	--	--	--	--	--	--	-	GO:0005488//binding	-
Unigene58580_All	641	74	24	4.7868	1.4618	1.7113	up	5.56e-08	1.19e-06	gi|42565130|ref|NP_188964.2|	152	3e-36	ethylene-responsive transcription factor ERF098 [Arabidopsis thaliana] >gi|75274087|sp|Q9LTC5.1|ERF98_ARATH RecName: Full=Ethylene-responsive transcription factor ERF098 >gi|7939533|dbj|BAA95736.1| Nicotiana EREBP-3-like protein [Arabidopsis thaliana] >gi|332643216|gb|AEE76737.1| ethylene-responsive transcription factor ERF098 [Arabidopsis thaliana]	sp|Q9LTC5|ERF98_ARATH	152	2e-36	Ethylene-responsive transcription factor ERF098 OS=Arabidopsis thaliana GN=ERF098 PE=2 SV=1	--	--	--	--	--	K09286	2e-23	106	ath:AT5G47220	EREBP-like factor	-	-	-
Unigene5821_All	1195	80	26	2.7758	0.8494	1.7084	up	1.66e-08	3.85e-07	--	--	--	--	--	--	--	--	--	--	--	--	--	--	--	--	--	--	-	-	-
Unigene79918_All	551	40	13	3.0101	0.9211	1.7084	up	7.19e-05	0.000801	gi|15222997|ref|NP_172253.1|	157	6e-38	pentatricopeptide repeat-containing protein [Arabidopsis thaliana] >gi|75180186|sp|Q9LQQ1.1|PPR20_ARATH RecName: Full=Pentatricopeptide repeat-containing protein At1g07740, mitochondrial; Flags: Precursor >gi|8439893|gb|AAF75079.1|AC007583_15 It contains PPR repeats PF|01535 [Arabidopsis thaliana] >gi|31376389|gb|AAP49521.1| At1g07730 [Arabidopsis thaliana] >gi|332190050|gb|AEE28171.1| pentatrico…	sp|Q9LQQ1|PPR20_ARATH	157	3e-38	Pentatricopeptide repeat-containing protein At1g07740, mitochondrial OS=Arabidopsis thaliana GN=At1g07740 PE=2 SV=1	--	--	--	--	--	--	--	--	--	--	-	GO:0017111//nucleoside-triphosphatase activity;GO:0000166//nucleotide binding	-
Unigene34251_All	719	40	13	2.3067	0.7059	1.7083	up	7.19e-05	0.000801	gi|220938738|emb|CAR78979.1|	351	5e-96	phosphoenolpyruvate carboxykinase [Digitaria sanguinalis]	sp|Q7RVS9|PCKA_NEUCR	458	1e-128	Phosphoenolpyruvate carboxykinase [ATP] OS=Neurospora crassa GN=pck-1 PE=3 SV=1	YKR097w	394	8e-110	COG1866	Phosphoenolpyruvate carboxykinase (ATP)	K01610	2e-95	345	rcu:RCOM_1584090	phosphoenolpyruvate carboxykinase (ATP) [EC:4.1.1.49]	GO:0006006//glucose metabolic process	GO:0004611//phosphoenolpyruvate carboxykinase activity;GO:0032559//adenyl ribonucleotide binding;GO:0016772//transferase activity, transferring phosphorus-containing groups	GO:0044424//intracellular part
Unigene77977_All	814	40	13	2.0375	0.6235	1.7083	up	7.19e-05	0.000801	gi|22325671|ref|NP_671849.1|	66.2	3e-17	uncharacterized protein [Arabidopsis thaliana] >gi|30679043|ref|NP_850991.1| uncharacterized protein [Arabidopsis thaliana] >gi|28416861|gb|AAO42961.1| At2g14045 [Arabidopsis thaliana] >gi|330251178|gb|AEC06272.1| uncharacterized protein [Arabidopsis thaliana] >gi|330251179|gb|AEC06273.1| uncharacterized protein [Arabidopsis thaliana]	--	--	--	--	--	--	--	--	--	--	--	--	--	--	GO:0044238//primary metabolic process	GO:0016798//hydrolase activity, acting on glycosyl bonds;GO:0043167//ion binding	-
Unigene18471_All	1759	243	79	5.7281	1.7534	1.7079	up	5.67e-23	4.1e-21	gi|15241489|ref|NP_196419.1|	63.5	4e-17	RPA70-kDa subunit B [Arabidopsis thaliana] >gi|6562316|emb|CAB62614.1| replication factor A-like protein [Arabidopsis thaliana] >gi|332003852|gb|AED91235.1| RPA70-kDa subunit B [Arabidopsis thaliana]	sp|Q01588|RFA1_XENLA	47.8	2e-10	Replication protein A 70 kDa DNA-binding subunit OS=Xenopus laevis GN=rpa1 PE=1 SV=1	YAR007c	47.8	5e-11	COG1599	Single-stranded DNA-binding replication protein A (RPA), large (70 kD) subunit and related ssDNA-binding proteins	K07466	3e-21	66.6	ppp:PHYPADRAFT_223341	replication factor A1	-	-	-
Unigene6052_All	501	1125	366	93.1071	28.5214	1.7068	up	2.97e-100	1.14e-97	gi|11496133|gb|AAG36666.1|	213	7e-55	oxalate oxidase-like germin 171 [Beta vulgaris]	sp|O04012|AB19B_PRUPE	132	1e-30	Auxin-binding protein ABP19b OS=Prunus persica GN=ABP19B PE=3 SV=1	--	--	--	--	--	--	--	--	--	--	-	GO:0046914//transition metal ion binding	GO:0005576//extracellular region
Unigene83385_All	335	43	14	5.3222	1.6316	1.7057	up	3.88e-05	0.000462	--	--	--	--	--	--	--	--	--	--	--	--	--	--	--	--	--	--	-	-	-
Unigene30197_All	1665	46	15	1.1455	0.3517	1.7036	up	2.09e-05	0.000269	gi|15225480|ref|NP_181483.1|	227	3e-58	nodulin MtN21-like protein [Arabidopsis thaliana] >gi|3355480|gb|AAC27842.1| nodulin-like protein [Arabidopsis thaliana] >gi|30017241|gb|AAP12854.1| At2g39510 [Arabidopsis thaliana] >gi|110743791|dbj|BAE99731.1| nodulin-like protein [Arabidopsis thaliana] >gi|330254594|gb|AEC09688.1| nodulin MtN21-like protein [Arabidopsis thaliana]	sp|Q6J163|5NG4_PINTA	120	4e-26	Auxin-induced protein 5NG4 OS=Pinus taeda PE=2 SV=1	--	--	--	--	--	--	--	--	--	--	-	-	GO:0044464//cell part
Unigene59703_All	1247	46	15	1.5295	0.4696	1.7036	up	2.09e-05	0.000268	gi|115460008|ref|NP_001053604.1|	161	2e-38	Os04g0571200 [Oryza sativa Japonica Group] >gi|113565175|dbj|BAF15518.1| Os04g0571200 [Oryza sativa Japonica Group]	sp|Q8L649|BB_ARATH	120	2e-26	E3 ubiquitin ligase BIG BROTHER OS=Arabidopsis thaliana GN=BB PE=1 SV=1	SPAC57A7.09	52.4	2e-06	COG5540	RING-finger-containing ubiquitin ligase	K11982	5e-08	56.6	vvi:100262515	E3 ubiquitin-protein ligase RNF115/126 [EC:6.3.2.19]	-	-	GO:0044464//cell part
Unigene46614_All	526	46	15	3.6261	1.1134	1.7034	up	2.09e-05	0.000268	--	--	--	--	--	--	--	--	--	--	--	--	--	--	--	--	--	--	-	-	-
Unigene28531_All	451	49	16	4.5049	1.3851	1.7015	up	1.13e-05	0.000155	gi|297799896|ref|XP_002867832.1|	68.9	2e-11	proton-dependent oligopeptide transport family protein [Arabidopsis lyrata subsp. lyrata] >gi|297313668|gb|EFH44091.1| proton-dependent oligopeptide transport family protein [Arabidopsis lyrata subsp. lyrata]	sp|Q8GXN2|PTR47_ARATH	68.9	1e-11	Nitrate transporter 1.8 OS=Arabidopsis thaliana GN=NRT1.8 PE=2 SV=2	--	--	--	--	--	K03305	5e-08	54.3	zma:100280282	proton-dependent oligopeptide transporter, POT family	GO:0015833//peptide transport	GO:0004871//signal transducer activity	GO:0044464//cell part
Unigene63425_All	404	49	16	5.029	1.5462	1.7015	up	1.13e-05	0.000155	--	--	--	--	--	--	--	--	--	--	--	--	--	--	--	--	--	--	-	-	-
Unigene78668_All	339	49	16	5.9933	1.8427	1.7015	up	1.13e-05	0.000155	gi|297817160|ref|XP_002876463.1|	56.2	1e-07	universal stress protein family protein [Arabidopsis lyrata subsp. lyrata] >gi|297322301|gb|EFH52722.1| universal stress protein family protein [Arabidopsis lyrata subsp. lyrata]	--	--	--	--	--	--	--	--	--	--	--	--	--	--	-	-	-
Unigene40029_All	1246	52	17	1.7304	0.5327	1.6997	up	6.14e-06	8.95e-05	gi|130582|sp|P10978.1|POLX_TOBAC	53.1	8e-06	RecName: Full=Retrovirus-related Pol polyprotein from transposon TNT 1-94; Includes: RecName: Full=Protease; Includes: RecName: Full=Reverse transcriptase; Includes: RecName: Full=Endonuclease	sp|P10978|POLX_TOBAC	53.1	4e-06	Retrovirus-related Pol polyprotein from transposon TNT 1-94 OS=Nicotiana tabacum PE=2 SV=1	--	--	--	--	--	--	--	--	--	--	-	-	-
Unigene64364_All	319	55	18	7.1489	2.203	1.6983	up	3.34e-06	5.15e-05	gi|159488530|ref|XP_001702260.1|	65.5	2e-10	DEAH-box RNA helicase [Chlamydomonas reinhardtii] >gi|158271237|gb|EDO97061.1| DEAH-box RNA helicase [Chlamydomonas reinhardtii]	sp|Q69566|U88_HHV6U	72	1e-12	Uncharacterized protein U88 OS=Human herpesvirus 6A (strain Uganda-1102) GN=U88 PE=4 SV=1	YPR042c	47.4	6e-06	COG5099	RNA-binding protein of the Puf family, translational repressor	K12815	1e-11	65.5	cre:CHLREDRAFT_132956	pre-mRNA-splicing factor ATP-dependent RNA helicase PRP16 [EC:3.6.4.13]	-	GO:0005488//binding;GO:0003824//catalytic activity	-
Unigene67063_All	1611	449	147	11.5563	3.5625	1.6977	up	9.14e-41	1.31e-38	--	--	--	--	--	--	--	--	--	--	--	--	--	--	--	--	--	--	-	-	-
Unigene70973_All	1130	61	20	2.2383	0.691	1.6956	up	9.86e-07	1.7e-05	gi|124359710|gb|ABN06064.1|	118	2e-52	RNA-directed DNA polymerase (Reverse transcriptase); Chromo; Zinc finger, CCHC-type; Peptidase aspartic, active site; Polynucleotidyl transferase, Ribonuclease H fold [Medicago truncatula]	sp|Q99315|YG31B_YEAST	68.6	1e-16	Transposon Ty3-G Gag-Pol polyprotein OS=Saccharomyces cerevisiae (strain ATCC 204508 / S288c) GN=TY3B-G PE=1 SV=3	YGR109w-b_2	68.6	2e-17	COG2801	Transposase and inactivated derivatives	--	--	--	--	--	GO:0006259//DNA metabolic process	GO:0003676//nucleic acid binding;GO:0003824//catalytic activity	GO:0044464//cell part
Unigene5285_All	470	67	22	5.9108	1.8275	1.6935	up	2.93e-07	5.55e-06	--	--	--	--	--	--	--	--	--	--	--	--	--	--	--	--	--	--	-	-	-
Unigene49220_All	440	79	26	7.4446	2.307	1.6902	up	2.61e-08	5.85e-07	--	--	--	--	--	--	--	--	--	--	--	--	--	--	--	--	--	--	-	-	-
Unigene58482_All	873	82	27	3.8946	1.2075	1.6895	up	1.43e-08	3.34e-07	gi|79338671|ref|NP_172300.2|	300	2e-80	uncharacterized protein [Arabidopsis thaliana] >gi|332190141|gb|AEE28262.1| uncharacterized protein [Arabidopsis thaliana]	--	--	--	--	--	--	--	--	--	--	--	--	--	--	-	-	-
Unigene88076_All	767	584	193	31.5708	9.824	1.6842	up	6.13e-52	1.16e-49	--	--	--	--	--	--	--	--	--	--	--	--	--	--	--	--	--	--	-	-	-
Unigene16955_All	980	57	19	2.4117	0.7569	1.6719	up	2.85e-06	4.45e-05	gi|334182750|ref|NP_001185058.1|	271	1e-71	preprotein translocase secA-like protein [Arabidopsis thaliana] >gi|332192012|gb|AEE30133.1| preprotein translocase secA-like protein [Arabidopsis thaliana]	sp|B0C1V9|SECA_ACAM1	67.8	1e-10	Protein translocase subunit secA OS=Acaryochloris marina (strain MBIC 11017) GN=secA PE=3 SV=1	AGl2621	63.9	4e-10	COG0653	Preprotein translocase subunit SecA (ATPase, RNA helicase)	K03070	9e-79	291	vvi:100248990	preprotein translocase subunit SecA	-	-	-
Unigene28771_All	984	45	15	1.8962	0.5951	1.6719	up	3.3e-05	0.000404	gi|307136290|gb|ADN34117.1|	224	1e-57	phospholipid-transporting ATPase [Cucumis melo subsp. melo]	sp|Q9SLK6|ALA6_ARATH	192	2e-48	Phospholipid-transporting ATPase 6 OS=Arabidopsis thaliana GN=ALA6 PE=1 SV=2	ECU06g0930	77.4	3e-14	COG0474	Cation transport ATPase	K01530	2e-56	217	rcu:RCOM_0654980	phospholipid-translocating ATPase [EC:3.6.3.1]	GO:0009206;GO:0006869//lipid transport	GO:0042625//ATPase activity, coupled to transmembrane movement of ions;GO:0046914//transition metal ion binding;GO:0005548//phospholipid transporter activity;GO:0032559//adenyl ribonucleotide binding	GO:0031224//intrinsic to membrane;GO:0043231//intracellular membrane-bounded organelle
Unigene40291_All	1157	42	14	1.5052	0.4724	1.6719	up	6.12e-05	0.000693	gi|334182986|ref|NP_001185127.1|	257	2e-67	pre-mRNA-splicing factor ATP-dependent RNA helicase DHX16 [Arabidopsis thaliana] >gi|332193372|gb|AEE31493.1| pre-mRNA-splicing factor ATP-dependent RNA helicase DHX16 [Arabidopsis thaliana]	sp|O45244|DHX16_CAEEL	187	2e-46	Probable pre-mRNA-splicing factor ATP-dependent RNA helicase mog-4 OS=Caenorhabditis elegans GN=mog-4 PE=1 SV=2	YER013w_2	124	2e-28	COG1643	HrpA-like helicases	K12813	1e-68	257	ath:AT1G32490	pre-mRNA-splicing factor ATP-dependent RNA helicase DHX16 [EC:3.6.4.13]	-	-	-
Unigene71467_All	826	75	25	3.7649	1.1816	1.6719	up	7.47e-08	1.56e-06	gi|18418385|ref|NP_568355.1|	209	6e-61	tRNA (guanine-N-7) methyltransferase [Arabidopsis thaliana] >gi|30984522|gb|AAP42724.1| At5g17660 [Arabidopsis thaliana] >gi|332005070|gb|AED92453.1| tRNA (guanine-N-7) methyltransferase [Arabidopsis thaliana]	sp|Q2JRH1|TRMB_SYNJA	100	4e-23	tRNA (guanine-N(7)-)-methyltransferase OS=Synechococcus sp. (strain JA-3-3Ab) GN=trmB PE=3 SV=1	sll1300	98.6	1e-20	COG0220	Predicted S-adenosylmethionine-dependent methyltransferase	K03439	1e-67	226	pop:POPTR_242124	tRNA (guanine-N7-)-methyltransferase [EC:2.1.1.33]	-	-	-
Unigene132814_All	342	63	21	7.638	2.3973	1.6718	up	8.43e-07	1.47e-05	gi|197293846|gb|ACH58421.1|	82	2e-15	nodulin 93 [Prunus dulcis]	sp|Q02921|NO93_SOYBN	77.8	2e-14	Early nodulin-93 OS=Glycine max PE=2 SV=1	--	--	--	--	--	--	--	--	--	--	GO:0044403//symbiosis, encompassing mutualism through parasitism	-	GO:0031224//intrinsic to membrane
Unigene13684_All	645	42	14	2.7	0.8474	1.6718	up	6.12e-05	0.000693	--	--	--	--	--	--	--	--	--	--	--	--	--	--	--	--	--	--	-	-	-
Unigene19850_All	410	57	19	5.7645	1.8092	1.6718	up	2.85e-06	4.45e-05	--	--	--	--	--	--	--	--	--	--	--	--	--	--	--	--	--	--	-	-	-
Unigene26814_All	659	42	14	2.6426	0.8294	1.6718	up	6.12e-05	0.000693	--	--	--	--	--	--	--	--	--	--	--	--	--	--	--	--	--	--	-	-	-
Unigene37949_All	766	228	76	12.3417	3.8736	1.6718	up	4.75e-21	3.12e-19	gi|87162671|gb|ABD28466.1|	57.8	2e-07	hypothetical protein MtrDRAFT_AC148819g3v2 [Medicago truncatula]	--	--	--	--	--	--	--	--	--	--	--	--	--	--	-	-	-
Unigene45512_All	424	111	37	10.8549	3.4069	1.6718	up	5.52e-11	1.73e-09	--	--	--	--	--	--	--	--	--	--	--	--	--	--	--	--	--	--	-	-	-
Unigene49545_All	794	51	17	2.6633	0.8359	1.6718	up	9.66e-06	0.000134	--	--	--	--	--	--	--	--	--	--	--	--	--	--	--	--	--	--	-	-	-
Unigene62672_All	435	48	16	4.5753	1.436	1.6718	up	1.78e-05	0.000234	gi|145346330|ref|XP_001417642.1|	135	2e-31	Ribosomal protein L27, component of cytosolic 80S ribosome and 60S large subunit [Ostreococcus lucimarinus CCE9901] >gi|144577870|gb|ABO95935.1| Ribosomal protein L27, component of cytosolic 80S ribosome and 60S large subunit [Ostreococcus lucimarinus CCE9901]	sp|O14388|RL27A_SCHPO	179	5e-45	60S ribosomal protein L27-A OS=Schizosaccharomyces pombe (strain ATCC 38366 / 972) GN=rpl27a PE=2 SV=2	SPBC685.07c	179	1e-45	COG2163	Ribosomal protein L14E/L6E/L27E	K02901	1e-32	135	olu:OSTLU_31471	large subunit ribosomal protein L27e	-	-	GO:0030529//ribonucleoprotein complex
Unigene63_All	1164	117	39	4.1677	1.3081	1.6718	up	1.67e-11	5.53e-10	gi|121501704|gb|ABM55245.1|	168	1e-40	transposon-like protein [Beta vulgaris]	sp|Q69566|U88_HHV6U	52.4	6e-06	Uncharacterized protein U88 OS=Human herpesvirus 6A (strain Uganda-1102) GN=U88 PE=4 SV=1	--	--	--	--	--	--	--	--	--	--	-	-	-
Unigene65154_All	423	75	25	7.3517	2.3074	1.6718	up	7.47e-08	1.56e-06	--	--	--	--	--	--	--	--	--	--	--	--	--	--	--	--	--	--	-	-	-
Unigene73397_All	607	45	15	3.0739	0.9648	1.6718	up	3.3e-05	0.000404	gi|32400971|gb|AAP80691.1|	281	4e-75	ubiquitin-conjugating enzyme [Griffithsia japonica]	sp|O74196|UBC1_COLGL	307	4e-83	Ubiquitin-conjugating enzyme E2-16 kDa OS=Colletotrichum gloeosporioides GN=UBC1 PE=2 SV=1	SPBC119.02	296	2e-80	COG5078	Ubiquitin-protein ligase	K06689	7e-74	273	cme:CMD152C	ubiquitin-conjugating enzyme E2 D/E [EC:6.3.2.19]	GO:0060255;GO:0006464//protein modification process	GO:0016881//acid-amino acid ligase activity	-
Unigene7855_All	608	909	303	61.9909	19.4566	1.6718	up	4.82e-79	1.41e-76	gi|11497506|ref|NP_054914.1|	161	6e-39	ribosomal protein S16 [Spinacia oleracea] >gi|19857926|sp|P28807.2|RR16_SPIOL RecName: Full=30S ribosomal protein S16, chloroplastic >gi|188036217|pdb|3BBN|P Chain P, Homology Model For The Spinach Chloroplast 30s Subunit Fitted To 9.4a Cryo-Em Map Of The 70s Chlororibosome. >gi|7636087|emb|CAB88707.1| ribosomal protein S16 [Spinacia oleracea]	sp|P28807|RR16_SPIOL	161	3e-39	30S ribosomal protein S16, chloroplastic OS=Spinacia oleracea GN=rps16 PE=1 SV=2	ssr0482	89.7	3e-18	COG0228	Ribosomal protein S16	K02959	6e-36	147	vvi:4025122	small subunit ribosomal protein S16	GO:0010467//gene expression	GO:0005198//structural molecule activity	GO:0030529//ribonucleoprotein complex;GO:0009536//plastid
Unigene9119_All	275	72	24	10.8559	3.4073	1.6718	up	1.37e-07	2.74e-06	--	--	--	--	--	--	--	--	--	--	--	--	--	--	--	--	--	--	-	-	-
Unigene34846_All	937	57	19	2.5223	0.7917	1.6717	up	2.85e-06	4.45e-05	gi|51535575|dbj|BAD37519.1|	56.2	6e-07	zinc finger (CCCH-type) protein-like [Oryza sativa Japonica Group]	--	--	--	--	--	--	--	--	--	--	--	--	--	--	-	-	-
Unigene5253_All	839	51	17	2.5204	0.7911	1.6717	up	9.66e-06	0.000134	gi|4914318|gb|AAD32866.1|AC005489_4	66.2	5e-10	F14N23.4 [Arabidopsis thaliana]	--	--	--	--	--	--	--	--	--	--	--	--	--	--	-	-	-
Unigene81546_All	735	45	15	2.5386	0.7968	1.6717	up	3.3e-05	0.000403	gi|297597142|ref|NP_001043492.2|	103	2e-21	Os01g0600500 [Oryza sativa Japonica Group] >gi|255673430|dbj|BAF05406.2| Os01g0600500 [Oryza sativa Japonica Group]	sp|Q9FZ62|PPSP2_ARATH	94.7	6e-19	Inorganic pyrophosphatase 2 OS=Arabidopsis thaliana GN=At1g17710 PE=2 SV=1	--	--	--	--	--	--	--	--	--	--	-	-	-
Unigene32556_All	1210	1456	487	49.8935	15.7135	1.6668	up	5.76e-125	2.91e-122	gi|11497589|ref|NP_054996.1|	488	1e-137	ycf1 protein [Spinacia oleracea] >gi|7636170|emb|CAB88792.1| ycf1 protein [Spinacia oleracea]	sp|Q9M3J5|YCF1_SPIOL	488	3e-137	Putative membrane protein ycf1 OS=Spinacia oleracea GN=ycf1-A PE=3 SV=2	--	--	--	--	--	--	--	--	--	--	-	-	GO:0016020//membrane;GO:0009536//plastid
Unigene34359_All	863	143	48	6.8706	2.1715	1.6617	up	1.21e-13	4.89e-12	gi|317106727|dbj|BAJ53223.1|	173	3e-42	JHL06P13.2 [Jatropha curcas]	--	--	--	--	--	--	--	--	--	--	--	--	--	--	-	-	GO:0031224//intrinsic to membrane
Unigene67060_All	933	961	323	42.708	13.516	1.6598	up	1.26e-82	3.82e-80	gi|223029883|gb|ACM78623.1|	108	1e-22	non-specific lipid-transfer protein type 2 [Tamarix hispida]	sp|Q43681|NLTP_VIGUN	101	7e-21	Probable non-specific lipid-transfer protein AKCS9 OS=Vigna unguiculata PE=2 SV=1	--	--	--	--	--	--	--	--	--	--	GO:0006810//transport	-	GO:0031410//cytoplasmic vesicle
Unigene83100_All	859	95	32	4.5856	1.4544	1.6567	up	1.72e-09	4.52e-08	gi|297806381|ref|XP_002871074.1|	309	4e-83	short-chain dehydrogenase/reductase family protein [Arabidopsis lyrata subsp. lyrata] >gi|297316911|gb|EFH47333.1| short-chain dehydrogenase/reductase family protein [Arabidopsis lyrata subsp. lyrata]	sp|Q8N5I4|DHRSX_HUMAN	99.4	3e-20	Dehydrogenase/reductase SDR family member on chromosome X OS=Homo sapiens GN=DHRSX PE=2 SV=2	Rv0439c	98.2	2e-20	COG1028	Dehydrogenases with different specificities (related to short-chain alcohol dehydrogenases)	K00100	2e-09	60.8	olu:OSTLU_36252	[EC:1.1.1.-]	GO:0008152//metabolic process	GO:0003824//catalytic activity	GO:0043231//intracellular membrane-bounded organelle
Unigene22796_All	715	89	30	5.1612	1.6381	1.6557	up	5.72e-09	1.41e-07	gi|238481582|ref|NP_001154784.1|	92.4	5e-18	alpha-rhamnosidase-like protein [Arabidopsis thaliana] >gi|332009557|gb|AED96940.1| alpha-rhamnosidase-like protein [Arabidopsis thaliana]	--	--	--	--	STM1252	42.7	6e-10	COG4692	Predicted neuraminidase (sialidase)	--	--	--	--	--	-	-	-
Unigene42279_All	980	145	49	6.1349	1.9521	1.652	up	1.03e-13	4.22e-12	gi|226347399|gb|ACO50110.1|	420	1e-116	elongation factor 1 alpha [Euglena gracilis]	sp|Q01372|EF1A_NEUCR	479	1e-134	Elongation factor 1-alpha OS=Neurospora crassa GN=tef-1 PE=3 SV=2	SPCC794.09c	461	9e-130	COG5256	Translation elongation factor EF-1alpha (GTPase)	K03231	2e-112	402	zma:100284707	elongation factor EF-1 alpha subunit [EC:3.6.5.3]	-	-	-
Unigene8252_All	280	71	24	10.514	3.3464	1.6516	up	2.13e-07	4.15e-06	--	--	--	--	sp|P22151|GRG1_NEUCR	59.7	6e-09	Glucose-repressible gene protein OS=Neurospora crassa GN=grg-1 PE=2 SV=1	--	--	--	--	--	--	--	--	--	--	-	-	-
Unigene35991_All	654	133	45	8.4322	2.6864	1.6502	up	1.12e-12	4.14e-11	--	--	--	--	--	--	--	--	--	--	--	--	--	--	--	--	--	--	-	-	-
Unigene7901_All	426	65	22	6.3266	2.0162	1.6498	up	7.17e-07	1.27e-05	--	--	--	--	--	--	--	--	--	--	--	--	--	--	--	--	--	--	-	-	-
Unigene14044_All	1509	65	22	1.786	0.5692	1.6497	up	7.17e-07	1.27e-05	gi|297602873|ref|NP_001053020.2|	173	5e-42	Os04g0464800 [Oryza sativa Japonica Group] >gi|255675534|dbj|BAF14934.2| Os04g0464800 [Oryza sativa Japonica Group]	--	--	--	--	--	--	--	--	--	--	--	--	--	--	-	GO:0005488//binding	GO:0043231//intracellular membrane-bounded organelle
Unigene9543_All	418	59	20	5.8525	1.868	1.6476	up	2.42e-06	3.84e-05	--	--	--	--	--	--	--	--	--	--	--	--	--	--	--	--	--	--	-	-	-
[truncated: 2,514 more rows]
