# Supplementary material for: Global Transcriptome Profiling of Salicornia europaea L. Shoots under NaCl Treatment
Source: PLoS One. 2013 Jun 25;8(6):e65877. doi: 10.1371/journal.pone.0065877 (PMC3692491; doi:10.1371/journal.pone.0065877)
Supplement: Additional File S8 — Summary of DEGs GO Molecular Function. GO functional classification annotation provides a gene list and gene number for every specific GO term. Additional File S9 Summary of DEGs enriched in KEGG pathways. Pathways and backbone gene numbers are given in the table. The q-values for all pathways are less than or equal to 0.05. (XLSX) [file pone.0065877.s008.xlsx]

## Sheet: Sheet1
Terms from the Function Ontology with p-value as good or better than 1
Gene Ontology term	Cluster frequency		Genome frequency of use	Corrected P-value
structural molecule activity	65 out of 797 genes, 8.2%		884 out of 22813 genes, 3.9%	2.68e-06
iron ion binding	36 out of 797 genes, 4.5%		485 out of 22813 genes, 2.1%	0.00398
ATPase activity	36 out of 797 genes, 4.5%		630 out of 22813 genes, 2.8%	0.5591
ATPase activity, coupled	33 out of 797 genes, 4.1%		593 out of 22813 genes, 2.6%	1
transition metal ion binding	106 out of 797 genes, 13.3%		2412 out of 22813 genes, 10.6%	1
electron carrier activity	3 out of 797 genes, 0.4%		13 out of 22813 genes, 0.1%	1
oxidoreductase activity	101 out of 797 genes, 12.7%		2301 out of 22813 genes, 10.1%	1
ion binding	173 out of 797 genes, 21.7%		4207 out of 22813 genes, 18.4%	1
cation binding	166 out of 797 genes, 20.8%		4028 out of 22813 genes, 17.7%	1
oxidoreductase activity, acting on paired donors, with oxidation of a pair of donors resulting in the reduction of molecular oxygen to two molecules of water	3 out of 797 genes, 0.4%		14 out of 22813 genes, 0.1%	1
CoA desaturase activity	2 out of 797 genes, 0.3%		6 out of 22813 genes, 0.0%	1
ATPase activity, coupled to transmembrane movement of ions	13 out of 797 genes, 1.6%		192 out of 22813 genes, 0.8%	1
hydrolase activity, acting on acid anhydrides, catalyzing transmembrane movement of substances	18 out of 797 genes, 2.3%		298 out of 22813 genes, 1.3%	1
metal ion transmembrane transporter activity	9 out of 797 genes, 1.1%		114 out of 22813 genes, 0.5%	1
ATPase activity, coupled to transmembrane movement of substances	17 out of 797 genes, 2.1%		288 out of 22813 genes, 1.3%	1
ATPase activity, coupled to movement of substances	17 out of 797 genes, 2.1%		289 out of 22813 genes, 1.3%	1
phosphoenolpyruvate carboxykinase activity	3 out of 797 genes, 0.4%		20 out of 22813 genes, 0.1%	1
polysaccharide binding	2 out of 797 genes, 0.3%		10 out of 22813 genes, 0.0%	1
monooxygenase activity	14 out of 797 genes, 1.8%		242 out of 22813 genes, 1.1%	1
hydro-lyase activity	8 out of 797 genes, 1.0%		115 out of 22813 genes, 0.5%	1
small conjugating protein ligase activity	13 out of 797 genes, 1.6%		222 out of 22813 genes, 1.0%	1
aldehyde dehydrogenase [NAD(P)+] activity	3 out of 797 genes, 0.4%		24 out of 22813 genes, 0.1%	1
active transmembrane transporter activity	36 out of 797 genes, 4.5%		779 out of 22813 genes, 3.4%	1
nucleoside-triphosphatase activity	63 out of 797 genes, 7.9%		1482 out of 22813 genes, 6.5%	1
phospholipid transporter activity	3 out of 797 genes, 0.4%		27 out of 22813 genes, 0.1%	1
CoA-ligase activity	4 out of 797 genes, 0.5%		45 out of 22813 genes, 0.2%	1
vitamin binding	4 out of 797 genes, 0.5%		45 out of 22813 genes, 0.2%	1
acylglycerol O-acyltransferase activity	2 out of 797 genes, 0.3%		13 out of 22813 genes, 0.1%	1
sequence-specific DNA binding	2 out of 797 genes, 0.3%		13 out of 22813 genes, 0.1%	1
metal ion binding	143 out of 797 genes, 17.9%		3656 out of 22813 genes, 16.0%	1
ligase activity, forming carbon-nitrogen bonds	18 out of 797 genes, 2.3%		358 out of 22813 genes, 1.6%	1
antioxidant activity	14 out of 797 genes, 1.8%		266 out of 22813 genes, 1.2%	1
lysine N-methyltransferase activity	3 out of 797 genes, 0.4%		31 out of 22813 genes, 0.1%	1
protein-lysine N-methyltransferase activity	3 out of 797 genes, 0.4%		31 out of 22813 genes, 0.1%	1
rRNA binding	2 out of 797 genes, 0.3%		15 out of 22813 genes, 0.1%	1
acid-amino acid ligase activity	14 out of 797 genes, 1.8%		272 out of 22813 genes, 1.2%	1
ligase activity, forming carbon-sulfur bonds	5 out of 797 genes, 0.6%		70 out of 22813 genes, 0.3%	1
amine transmembrane transporter activity	6 out of 797 genes, 0.8%		91 out of 22813 genes, 0.4%	1
carbohydrate binding	7 out of 797 genes, 0.9%		114 out of 22813 genes, 0.5%	1
pattern binding	2 out of 797 genes, 0.3%		16 out of 22813 genes, 0.1%	1
oxidoreductase activity, oxidizing metal ions	2 out of 797 genes, 0.3%		16 out of 22813 genes, 0.1%	1
oxidoreductase activity, acting on the CH-NH2 group of donors	4 out of 797 genes, 0.5%		52 out of 22813 genes, 0.2%	1
UDP-glucosyltransferase activity	8 out of 797 genes, 1.0%		138 out of 22813 genes, 0.6%	1
cation-transporting ATPase activity	6 out of 797 genes, 0.8%		94 out of 22813 genes, 0.4%	1
lipid transporter activity	3 out of 797 genes, 0.4%		35 out of 22813 genes, 0.2%	1
nucleoside binding	2 out of 797 genes, 0.3%		18 out of 22813 genes, 0.1%	1
succinate-CoA ligase activity	2 out of 797 genes, 0.3%		18 out of 22813 genes, 0.1%	1
acid-thiol ligase activity	2 out of 797 genes, 0.3%		18 out of 22813 genes, 0.1%	1
lyase activity	22 out of 797 genes, 2.8%		487 out of 22813 genes, 2.1%	1
oxidoreductase activity, acting on the aldehyde or oxo group of donors, NAD or NADP as acceptor	6 out of 797 genes, 0.8%		101 out of 22813 genes, 0.4%	1
primary active transmembrane transporter activity	19 out of 797 genes, 2.4%		416 out of 22813 genes, 1.8%	1
P-P-bond-hydrolysis-driven transmembrane transporter activity	19 out of 797 genes, 2.4%		416 out of 22813 genes, 1.8%	1
cation transmembrane transporter activity	18 out of 797 genes, 2.3%		394 out of 22813 genes, 1.7%	1
solute:hydrogen antiporter activity	2 out of 797 genes, 0.3%		20 out of 22813 genes, 0.1%	1
ammonia ligase activity	2 out of 797 genes, 0.3%		20 out of 22813 genes, 0.1%	1
acid-ammonia (or amide) ligase activity	2 out of 797 genes, 0.3%		20 out of 22813 genes, 0.1%	1
cation channel activity	3 out of 797 genes, 0.4%		39 out of 22813 genes, 0.2%	1
N-methyltransferase activity	4 out of 797 genes, 0.5%		61 out of 22813 genes, 0.3%	1
iron-sulfur cluster binding	7 out of 797 genes, 0.9%		129 out of 22813 genes, 0.6%	1
pyrophosphatase activity	66 out of 797 genes, 8.3%		1676 out of 22813 genes, 7.3%	1
UDP-glycosyltransferase activity	11 out of 797 genes, 1.4%		226 out of 22813 genes, 1.0%	1
O-methyltransferase activity	3 out of 797 genes, 0.4%		41 out of 22813 genes, 0.2%	1
hydrolase activity, acting on acid anhydrides	67 out of 797 genes, 8.4%		1708 out of 22813 genes, 7.5%	1
oxidoreductase activity, acting on paired donors, with incorporation or reduction of molecular oxygen, NADH or NADPH as one donor, and incorporation of one atom of oxygen	5 out of 797 genes, 0.6%		85 out of 22813 genes, 0.4%	1
hydrolase activity, acting on acid anhydrides, in phosphorus-containing anhydrides	66 out of 797 genes, 8.3%		1684 out of 22813 genes, 7.4%	1
oxidoreductase activity, acting on the CH-CH group of donors	19 out of 797 genes, 2.4%		433 out of 22813 genes, 1.9%	1
carbon-sulfur lyase activity	3 out of 797 genes, 0.4%		43 out of 22813 genes, 0.2%	1
ligase activity	27 out of 797 genes, 3.4%		649 out of 22813 genes, 2.8%	1
carbon-oxygen lyase activity	8 out of 797 genes, 1.0%		161 out of 22813 genes, 0.7%	1
ion transmembrane transporter activity	27 out of 797 genes, 3.4%		650 out of 22813 genes, 2.8%	1
carboxy-lyase activity	6 out of 797 genes, 0.8%		113 out of 22813 genes, 0.5%	1
oxidoreductase activity, acting on the aldehyde or oxo group of donors	7 out of 797 genes, 0.9%		137 out of 22813 genes, 0.6%	1
RNA binding	25 out of 797 genes, 3.1%		600 out of 22813 genes, 2.6%	1
RNA polymerase activity	6 out of 797 genes, 0.8%		116 out of 22813 genes, 0.5%	1
oxidoreductase activity, acting on CH-OH group of donors	14 out of 797 genes, 1.8%		318 out of 22813 genes, 1.4%	1
protein methyltransferase activity	3 out of 797 genes, 0.4%		47 out of 22813 genes, 0.2%	1
glucosyltransferase activity	9 out of 797 genes, 1.1%		192 out of 22813 genes, 0.8%	1
substrate-specific transmembrane transporter activity	37 out of 797 genes, 4.6%		932 out of 22813 genes, 4.1%	1
fatty acid ligase activity	2 out of 797 genes, 0.3%		28 out of 22813 genes, 0.1%	1
oxidoreductase activity, acting on paired donors, with incorporation or reduction of molecular oxygen	10 out of 797 genes, 1.3%		224 out of 22813 genes, 1.0%	1
carboxylesterase activity	6 out of 797 genes, 0.8%		123 out of 22813 genes, 0.5%	1
carboxylic ester hydrolase activity	6 out of 797 genes, 0.8%		123 out of 22813 genes, 0.5%	1
translation factor activity, nucleic acid binding	14 out of 797 genes, 1.8%		329 out of 22813 genes, 1.4%	1
transmembrane transporter activity	49 out of 797 genes, 6.1%		1283 out of 22813 genes, 5.6%	1
metal cluster binding	8 out of 797 genes, 1.0%		177 out of 22813 genes, 0.8%	1
disulfide oxidoreductase activity	3 out of 797 genes, 0.4%		53 out of 22813 genes, 0.2%	1
solute:cation antiporter activity	3 out of 797 genes, 0.4%		53 out of 22813 genes, 0.2%	1
nucleic acid binding transcription factor activity	21 out of 797 genes, 2.6%		529 out of 22813 genes, 2.3%	1
carbohydrate phosphatase activity	2 out of 797 genes, 0.3%		32 out of 22813 genes, 0.1%	1
protein tyrosine kinase activity	5 out of 797 genes, 0.6%		110 out of 22813 genes, 0.5%	1
oxidoreductase activity, acting on the CH-NH2 group of donors, oxygen as acceptor	2 out of 797 genes, 0.3%		35 out of 22813 genes, 0.2%	1
secondary active transmembrane transporter activity	11 out of 797 genes, 1.4%		272 out of 22813 genes, 1.2%	1
oxidoreductase activity, acting on the CH-CH group of donors, oxygen as acceptor	2 out of 797 genes, 0.3%		36 out of 22813 genes, 0.2%	1
oxidoreductase activity, acting on the CH-CH group of donors, NAD or NADP as acceptor	14 out of 797 genes, 1.8%		357 out of 22813 genes, 1.6%	1
ion channel activity	4 out of 797 genes, 0.5%		88 out of 22813 genes, 0.4%	1
channel activity	4 out of 797 genes, 0.5%		88 out of 22813 genes, 0.4%	1
passive transmembrane transporter activity	4 out of 797 genes, 0.5%		88 out of 22813 genes, 0.4%	1
substrate-specific channel activity	4 out of 797 genes, 0.5%		88 out of 22813 genes, 0.4%	1
transferase activity, transferring glycosyl groups	20 out of 797 genes, 2.5%		526 out of 22813 genes, 2.3%	1
hydrogen ion transmembrane transporter activity	5 out of 797 genes, 0.6%		116 out of 22813 genes, 0.5%	1
transferase activity, transferring hexosyl groups	13 out of 797 genes, 1.6%		334 out of 22813 genes, 1.5%	1
carbon-carbon lyase activity	8 out of 797 genes, 1.0%		199 out of 22813 genes, 0.9%	1
catalytic activity	486 out of 797 genes, 61.0%		13804 out of 22813 genes, 60.5%	1
beta-glucosidase activity	2 out of 797 genes, 0.3%		40 out of 22813 genes, 0.2%	1
monovalent inorganic cation transmembrane transporter activity	6 out of 797 genes, 0.8%		151 out of 22813 genes, 0.7%	1
oxidoreductase activity, acting on the CH-OH group of donors, NAD or NADP as acceptor	9 out of 797 genes, 1.1%		235 out of 22813 genes, 1.0%	1
S-adenosylmethionine-dependent methyltransferase activity	4 out of 797 genes, 0.5%		97 out of 22813 genes, 0.4%	1
guanyl ribonucleotide binding	17 out of 797 genes, 2.1%		461 out of 22813 genes, 2.0%	1
guanyl nucleotide binding	17 out of 797 genes, 2.1%		463 out of 22813 genes, 2.0%	1
ATPase activity, coupled to transmembrane movement of ions, phosphorylative mechanism	3 out of 797 genes, 0.4%		71 out of 22813 genes, 0.3%	1
lysine N-acetyltransferase activity	2 out of 797 genes, 0.3%		44 out of 22813 genes, 0.2%	1
inorganic cation transmembrane transporter activity	7 out of 797 genes, 0.9%		183 out of 22813 genes, 0.8%	1
substrate-specific transporter activity	39 out of 797 genes, 4.9%		1092 out of 22813 genes, 4.8%	1
fatty acid synthase activity	2 out of 797 genes, 0.3%		45 out of 22813 genes, 0.2%	1
carbohydrate transmembrane transporter activity	2 out of 797 genes, 0.3%		45 out of 22813 genes, 0.2%	1
hydrolase activity, acting on glycosyl bonds	20 out of 797 genes, 2.5%		556 out of 22813 genes, 2.4%	1
peroxidase activity	3 out of 797 genes, 0.4%		76 out of 22813 genes, 0.3%	1
oxidoreductase activity, acting on peroxide as acceptor	3 out of 797 genes, 0.4%		76 out of 22813 genes, 0.3%	1
O-acyltransferase activity	2 out of 797 genes, 0.3%		49 out of 22813 genes, 0.2%	1
symporter activity	2 out of 797 genes, 0.3%		50 out of 22813 genes, 0.2%	1
solute:cation symporter activity	2 out of 797 genes, 0.3%		50 out of 22813 genes, 0.2%	1
hydrolase activity, hydrolyzing O-glycosyl compounds	14 out of 797 genes, 1.8%		398 out of 22813 genes, 1.7%	1
antiporter activity	3 out of 797 genes, 0.4%		81 out of 22813 genes, 0.4%	1
solute:solute antiporter activity	3 out of 797 genes, 0.4%		81 out of 22813 genes, 0.4%	1
double-stranded DNA binding	2 out of 797 genes, 0.3%		52 out of 22813 genes, 0.2%	1
transferase activity, transferring one-carbon groups	15 out of 797 genes, 1.9%		432 out of 22813 genes, 1.9%	1
transporter activity	51 out of 797 genes, 6.4%		1475 out of 22813 genes, 6.5%	1
endoribonuclease activity, producing 5'-phosphomonoesters	3 out of 797 genes, 0.4%		84 out of 22813 genes, 0.4%	1
oxidoreductase activity, acting on diphenols and related substances as donors, oxygen as acceptor	2 out of 797 genes, 0.3%		54 out of 22813 genes, 0.2%	1
NADH dehydrogenase (quinone) activity	2 out of 797 genes, 0.3%		55 out of 22813 genes, 0.2%	1
endonuclease activity, active with either ribo- or deoxyribonucleic acids and producing 5'-phosphomonoesters	3 out of 797 genes, 0.4%		86 out of 22813 genes, 0.4%	1
N-acetyltransferase activity	2 out of 797 genes, 0.3%		56 out of 22813 genes, 0.2%	1
lipase activity	2 out of 797 genes, 0.3%		56 out of 22813 genes, 0.2%	1
oxidoreductase activity, acting on diphenols and related substances as donors	2 out of 797 genes, 0.3%		56 out of 22813 genes, 0.2%	1
phospholipid binding	3 out of 797 genes, 0.4%		88 out of 22813 genes, 0.4%	1
methyltransferase activity	9 out of 797 genes, 1.1%		270 out of 22813 genes, 1.2%	1
endoribonuclease activity	3 out of 797 genes, 0.4%		89 out of 22813 genes, 0.4%	1
NADH dehydrogenase activity	2 out of 797 genes, 0.3%		59 out of 22813 genes, 0.3%	1
inorganic anion transmembrane transporter activity	2 out of 797 genes, 0.3%		59 out of 22813 genes, 0.3%	1
transaminase activity	2 out of 797 genes, 0.3%		61 out of 22813 genes, 0.3%	1
purine nucleotide binding	114 out of 797 genes, 14.3%		3354 out of 22813 genes, 14.7%	1
enzyme binding	3 out of 797 genes, 0.4%		94 out of 22813 genes, 0.4%	1
nucleotide binding	146 out of 797 genes, 18.3%		4281 out of 22813 genes, 18.8%	1
oxidoreductase activity, acting on single donors with incorporation of molecular oxygen	4 out of 797 genes, 0.5%		127 out of 22813 genes, 0.6%	1
N-acyltransferase activity	2 out of 797 genes, 0.3%		66 out of 22813 genes, 0.3%	1
ribonuclease activity	3 out of 797 genes, 0.4%		99 out of 22813 genes, 0.4%	1
glucosidase activity	3 out of 797 genes, 0.4%		100 out of 22813 genes, 0.4%	1
small GTPase regulator activity	2 out of 797 genes, 0.3%		67 out of 22813 genes, 0.3%	1
helicase activity	2 out of 797 genes, 0.3%		68 out of 22813 genes, 0.3%	1
adenylyltransferase activity	2 out of 797 genes, 0.3%		71 out of 22813 genes, 0.3%	1
endonuclease activity	3 out of 797 genes, 0.4%		105 out of 22813 genes, 0.5%	1
oxidoreductase activity, acting on a sulfur group of donors	3 out of 797 genes, 0.4%		105 out of 22813 genes, 0.5%	1
lipid binding	3 out of 797 genes, 0.4%		106 out of 22813 genes, 0.5%	1
transferase activity, transferring nitrogenous groups	2 out of 797 genes, 0.3%		72 out of 22813 genes, 0.3%	1
ribonucleotide binding	107 out of 797 genes, 13.4%		3215 out of 22813 genes, 14.1%	1
purine ribonucleotide binding	107 out of 797 genes, 13.4%		3215 out of 22813 genes, 14.1%	1
adenyl nucleotide binding	96 out of 797 genes, 12.0%		2901 out of 22813 genes, 12.7%	1
structure-specific DNA binding	2 out of 797 genes, 0.3%		74 out of 22813 genes, 0.3%	1
protein kinase activity	43 out of 797 genes, 5.4%		1339 out of 22813 genes, 5.9%	1
GTPase regulator activity	2 out of 797 genes, 0.3%		76 out of 22813 genes, 0.3%	1
nucleoside-triphosphatase regulator activity	2 out of 797 genes, 0.3%		76 out of 22813 genes, 0.3%	1
enzyme regulator activity	5 out of 797 genes, 0.6%		178 out of 22813 genes, 0.8%	1
adenyl ribonucleotide binding	91 out of 797 genes, 11.4%		2770 out of 22813 genes, 12.1%	1
exopeptidase activity	3 out of 797 genes, 0.4%		112 out of 22813 genes, 0.5%	1
acetyltransferase activity	3 out of 797 genes, 0.4%		114 out of 22813 genes, 0.5%	1
kinase activity	58 out of 797 genes, 7.3%		1815 out of 22813 genes, 8.0%	1
oxidoreductase activity, acting on NADH or NADPH, quinone or similar compound as acceptor	2 out of 797 genes, 0.3%		82 out of 22813 genes, 0.4%	1
intramolecular transferase activity	2 out of 797 genes, 0.3%		84 out of 22813 genes, 0.4%	1
DNA binding	14 out of 797 genes, 1.8%		487 out of 22813 genes, 2.1%	1
anion transmembrane transporter activity	3 out of 797 genes, 0.4%		124 out of 22813 genes, 0.5%	1
transferase activity, transferring acyl groups	10 out of 797 genes, 1.3%		365 out of 22813 genes, 1.6%	1
phosphotransferase activity, alcohol group as acceptor	43 out of 797 genes, 5.4%		1412 out of 22813 genes, 6.2%	1
identical protein binding	2 out of 797 genes, 0.3%		98 out of 22813 genes, 0.4%	1
cofactor binding	7 out of 797 genes, 0.9%		282 out of 22813 genes, 1.2%	1
cis-trans isomerase activity	2 out of 797 genes, 0.3%		102 out of 22813 genes, 0.4%	1
transferase activity, transferring acyl groups other than amino-acyl groups	8 out of 797 genes, 1.0%		321 out of 22813 genes, 1.4%	1
nuclease activity	7 out of 797 genes, 0.9%		288 out of 22813 genes, 1.3%	1
protein serine/threonine kinase activity	9 out of 797 genes, 1.1%		364 out of 22813 genes, 1.6%	1
signal transducer activity	14 out of 797 genes, 1.8%		541 out of 22813 genes, 2.4%	1
isomerase activity	8 out of 797 genes, 1.0%		342 out of 22813 genes, 1.5%	1
molecular transducer activity	15 out of 797 genes, 1.9%		599 out of 22813 genes, 2.6%	1
receptor signaling protein serine/threonine kinase activity	2 out of 797 genes, 0.3%		127 out of 22813 genes, 0.6%	1
receptor signaling protein activity	2 out of 797 genes, 0.3%		127 out of 22813 genes, 0.6%	1
phosphatase activity	7 out of 797 genes, 0.9%		330 out of 22813 genes, 1.4%	1
receptor activity	2 out of 797 genes, 0.3%		132 out of 22813 genes, 0.6%	1
oxidoreductase activity, acting on NADH or NADPH	2 out of 797 genes, 0.3%		133 out of 22813 genes, 0.6%	1
transferase activity	156 out of 797 genes, 19.6%		4998 out of 22813 genes, 21.9%	1
hydrolase activity, acting on ester bonds	25 out of 797 genes, 3.1%		990 out of 22813 genes, 4.3%	1
protein binding	29 out of 797 genes, 3.6%		1155 out of 22813 genes, 5.1%	1
hydrolase activity	140 out of 797 genes, 17.6%		4634 out of 22813 genes, 20.3%	1
phosphoric ester hydrolase activity	7 out of 797 genes, 0.9%		384 out of 22813 genes, 1.7%	1
peptidase activity	16 out of 797 genes, 2.0%		763 out of 22813 genes, 3.3%	1
transferase activity, transferring phosphorus-containing groups	80 out of 797 genes, 10.0%		2962 out of 22813 genes, 13.0%	1
endopeptidase activity	6 out of 797 genes, 0.8%		424 out of 22813 genes, 1.9%	1
peptidase activity, acting on L-amino acid peptides	11 out of 797 genes, 1.4%		680 out of 22813 genes, 3.0%	1
binding	514 out of 797 genes, 64.5%		15909 out of 22813 genes, 69.7%	1
nucleotidyltransferase activity	14 out of 797 genes, 1.8%		856 out of 22813 genes, 3.8%	1
nucleic acid binding	118 out of 797 genes, 14.8%		4507 out of 22813 genes, 19.8%	1
DNA polymerase activity	5 out of 797 genes, 0.6%		570 out of 22813 genes, 2.5%	1
Gene Ontology term		Genes annotated to the term
structural molecule activity		Unigene120679_All, Unigene59515_All, Unigene90141_All, Unigene75543_All, Unigene120351_All, Unigene26266_All, Unigene125058_All, Unigene120818_All, Unigene11760_All, Unigene11216_All, Unigene64530_All, Unigene25236_All, Unigene37348_All, Unigene125024_All, Unigene6271_All, Unigene34051_All, Unigene19911_All, Unigene63864_All, Unigene65029_All, Unigene52436_All, Unigene64578_All, Unigene128639_All…
iron ion binding		Unigene78581_All, Unigene107830_All, Unigene11761_All, Unigene22884_All, Unigene75838_All, Unigene80489_All, Unigene64686_All, Unigene1494_All, Unigene73942_All, Unigene78765_All, Unigene62022_All, Unigene86191_All, Unigene127208_All, Unigene9250_All, Unigene121132_All, Unigene1233_All, Unigene9501_All, Unigene6583_All, Unigene89732_All, Unigene70720_All, Unigene28529_All, Unigene45263_All, Unige…
ATPase activity		Unigene10889_All, Unigene54741_All, Unigene26955_All, Unigene124239_All, Unigene1021_All, Unigene5058_All, Unigene9308_All, Unigene68140_All, Unigene65521_All, Unigene8501_All, Unigene62641_All, Unigene16064_All, Unigene6468_All, Unigene924_All, Unigene5654_All, Unigene15839_All, Unigene62013_All, Unigene52599_All, Unigene7949_All, Unigene125288_All, Unigene2064_All, Unigene76531_All, Unigene2877…
ATPase activity, coupled		Unigene10889_All, Unigene54741_All, Unigene26955_All, Unigene124239_All, Unigene1021_All, Unigene5058_All, Unigene9308_All, Unigene68140_All, Unigene65521_All, Unigene8501_All, Unigene62641_All, Unigene127147_All, Unigene16064_All, Unigene6468_All, Unigene924_All, Unigene5654_All, Unigene923_All, Unigene30113_All, Unigene15839_All, Unigene62013_All, Unigene13654_All, Unigene32119_All, Unigene7949…
transition metal ion binding		Unigene44514_All, Unigene14201_All, Unigene107830_All, Unigene22975_All, Unigene70744_All, Unigene67789_All, Unigene128020_All, Unigene11761_All, Unigene22884_All, Unigene75838_All, Unigene23243_All, Unigene81463_All, Unigene6052_All, Unigene6051_All, Unigene16332_All, Unigene59940_All, Unigene6575_All, Unigene54756_All, Unigene45679_All, Unigene123670_All, Unigene29211_All, Unigene59656_All, Uni…
electron carrier activity		Unigene28084_All, Unigene80489_All, Unigene52254_All
oxidoreductase activity		Unigene56777_All, Unigene80716_All, Unigene46752_All, Unigene107830_All, Unigene70744_All, Unigene67789_All, Unigene47486_All, Unigene40663_All, Unigene8869_All, Unigene11761_All, Unigene22884_All, Unigene23243_All, Unigene44912_All, Unigene123551_All, Unigene13365_All, Unigene16332_All, Unigene71899_All, Unigene13225_All, Unigene30439_All, Unigene62013_All, Unigene34141_All, Unigene7949_All, Uni…
ion binding		Unigene44514_All, Unigene73072_All, Unigene9308_All, Unigene46752_All, Unigene14201_All, Unigene107830_All, Unigene22975_All, Unigene128020_All, Unigene22884_All, Unigene75838_All, Unigene81463_All, Unigene16064_All, Unigene6051_All, Unigene6575_All, Unigene59580_All, Unigene45679_All, Unigene123670_All, Unigene34285_All, Unigene29600_All, Unigene14717_All, Unigene127208_All, Unigene59624_All, Un…
cation binding		Unigene44514_All, Unigene73072_All, Unigene9308_All, Unigene46752_All, Unigene14201_All, Unigene107830_All, Unigene22975_All, Unigene128020_All, Unigene22884_All, Unigene75838_All, Unigene81463_All, Unigene16064_All, Unigene6051_All, Unigene6575_All, Unigene59580_All, Unigene45679_All, Unigene123670_All, Unigene29600_All, Unigene14717_All, Unigene127208_All, Unigene59624_All, Unigene88629_All, Un…
oxidoreductase activity, acting on paired donors, with oxidation of a pair of donors resulting in the reduction of molecular oxygen to two molecules of water		Unigene62022_All, Unigene73393_All, Unigene127208_All
CoA desaturase activity		Unigene73393_All, Unigene127208_All
ATPase activity, coupled to transmembrane movement of ions		Unigene124239_All, Unigene15839_All, Unigene5058_All, Unigene9308_All, Unigene32119_All, Unigene65521_All, Unigene125288_All, Unigene28771_All, Unigene68417_All, Unigene127147_All, Unigene41408_All, Unigene16064_All, Unigene69403_All
hydrolase activity, acting on acid anhydrides, catalyzing transmembrane movement of substances		Unigene124239_All, Unigene5058_All, Unigene9308_All, Unigene65521_All, Unigene127147_All, Unigene16064_All, Unigene122693_All, Unigene6468_All, Unigene62013_All, Unigene15839_All, Unigene32119_All, Unigene7949_All, Unigene125288_All, Unigene2064_All, Unigene28771_All, Unigene68417_All, Unigene41408_All, Unigene69403_All
metal ion transmembrane transporter activity		Unigene5058_All, Unigene32119_All, Unigene59698_All, Unigene68417_All, Unigene1201_All, Unigene41408_All, Unigene30025_All, Unigene69403_All, Unigene1202_All
ATPase activity, coupled to transmembrane movement of substances		Unigene124239_All, Unigene5058_All, Unigene9308_All, Unigene65521_All, Unigene127147_All, Unigene16064_All, Unigene6468_All, Unigene62013_All, Unigene15839_All, Unigene32119_All, Unigene7949_All, Unigene125288_All, Unigene2064_All, Unigene28771_All, Unigene68417_All, Unigene41408_All, Unigene69403_All
ATPase activity, coupled to movement of substances		Unigene124239_All, Unigene5058_All, Unigene9308_All, Unigene65521_All, Unigene127147_All, Unigene16064_All, Unigene6468_All, Unigene62013_All, Unigene15839_All, Unigene32119_All, Unigene7949_All, Unigene125288_All, Unigene2064_All, Unigene28771_All, Unigene68417_All, Unigene41408_All, Unigene69403_All
phosphoenolpyruvate carboxykinase activity		Unigene52581_All, Unigene124514_All, Unigene34251_All
polysaccharide binding		Unigene32035_All, Unigene44869_All
monooxygenase activity		Unigene13365_All, Unigene78581_All, Unigene5367_All, Unigene89732_All, Unigene62904_All, Unigene22884_All, Unigene14644_All, Unigene45098_All, Unigene80856_All, Unigene24935_All, Unigene123517_All, Unigene1494_All, Unigene1233_All, Unigene76076_All
hydro-lyase activity		Unigene67762_All, Unigene22327_All, Unigene32119_All, Unigene40663_All, Unigene59804_All, Unigene41408_All, Unigene53195_All, Unigene69403_All
small conjugating protein ligase activity		Unigene37286_All, Unigene44078_All, Unigene34739_All, Unigene59088_All, Unigene27654_All, Unigene42848_All, Unigene42078_All, Unigene1326_All, Unigene5745_All, Unigene15486_All, Unigene45253_All, Unigene1325_All, Unigene61320_All
aldehyde dehydrogenase [NAD(P)+] activity		Unigene120366_All, Unigene125287_All, Unigene44912_All
active transmembrane transporter activity		Unigene124239_All, Unigene5058_All, Unigene9308_All, Unigene65521_All, Unigene47689_All, Unigene16064_All, Unigene6468_All, Unigene35683_All, Unigene21877_All, Unigene15839_All, Unigene62013_All, Unigene7949_All, Unigene125288_All, Unigene2064_All, Unigene28771_All, Unigene76680_All, Unigene19803_All, Unigene30025_All, Unigene69403_All, Unigene18236_All, Unigene60151_All, Unigene39816_All, Unigen…
nucleoside-triphosphatase activity		Unigene124129_All, Unigene10889_All, Unigene54741_All, Unigene26955_All, Unigene124239_All, Unigene28153_All, Unigene125022_All, Unigene1021_All, Unigene5058_All, Unigene560_All, Unigene9308_All, Unigene68140_All, Unigene65521_All, Unigene8501_All, Unigene38879_All, Unigene62641_All, Unigene16064_All, Unigene124501_All, Unigene6468_All, Unigene924_All, Unigene64480_All, Unigene5654_All, Unigene12…
phospholipid transporter activity		Unigene28771_All, Unigene15839_All, Unigene16064_All
CoA-ligase activity		Unigene44188_All, Unigene24935_All, Unigene122962_All, Unigene15869_All
vitamin binding		Unigene46752_All, Unigene32086_All, Unigene61185_All, Unigene14595_All
acylglycerol O-acyltransferase activity		Unigene22651_All, Unigene52388_All
sequence-specific DNA binding		Unigene54903_All, Unigene30093_All
metal ion binding		Unigene44514_All, Unigene73072_All, Unigene9308_All, Unigene14201_All, Unigene107830_All, Unigene22975_All, Unigene128020_All, Unigene22884_All, Unigene75838_All, Unigene81463_All, Unigene16064_All, Unigene6051_All, Unigene6575_All, Unigene59580_All, Unigene45679_All, Unigene123670_All, Unigene29600_All, Unigene14717_All, Unigene127208_All, Unigene59624_All, Unigene88629_All, Unigene19811_All, Un…
ligase activity, forming carbon-nitrogen bonds		Unigene44078_All, Unigene27654_All, Unigene54167_All, Unigene1326_All, Unigene16282_All, Unigene12289_All, Unigene5745_All, Unigene15486_All, Unigene45253_All, Unigene73397_All, Unigene120324_All, Unigene37286_All, Unigene59088_All, Unigene34739_All, Unigene42848_All, Unigene42078_All, Unigene1325_All, Unigene61320_All
antioxidant activity		Unigene45027_All, Unigene13593_All, Unigene6583_All, Unigene11571_All, Unigene7804_All, Unigene63960_All, Unigene86191_All, Unigene64686_All, Unigene132811_All, Unigene9250_All, Unigene78765_All, Unigene76076_All, Unigene9501_All, Unigene41003_All
lysine N-methyltransferase activity		Unigene44514_All, Unigene6575_All, Unigene18409_All
protein-lysine N-methyltransferase activity		Unigene44514_All, Unigene6575_All, Unigene18409_All
rRNA binding		Unigene125025_All, Unigene26266_All
acid-amino acid ligase activity		Unigene37286_All, Unigene44078_All, Unigene34739_All, Unigene59088_All, Unigene27654_All, Unigene42848_All, Unigene42078_All, Unigene1326_All, Unigene5745_All, Unigene15486_All, Unigene45253_All, Unigene1325_All, Unigene61320_All, Unigene73397_All
ligase activity, forming carbon-sulfur bonds		Unigene44188_All, Unigene24935_All, Unigene122962_All, Unigene44491_All, Unigene15869_All
amine transmembrane transporter activity		Unigene18236_All, Unigene13593_All, Unigene28007_All, Unigene28006_All, Unigene47689_All, Unigene28008_All
carbohydrate binding		Unigene32035_All, Unigene12048_All, Unigene44869_All, Unigene69309_All, Unigene125420_All, Unigene42659_All, Unigene32135_All
pattern binding		Unigene32035_All, Unigene44869_All
oxidoreductase activity, oxidizing metal ions		Unigene23243_All, Unigene121132_All
oxidoreductase activity, acting on the CH-NH2 group of donors		Unigene14381_All, Unigene46752_All, Unigene16180_All, Unigene83632_All
UDP-glucosyltransferase activity		Unigene73686_All, Unigene56481_All, Unigene125311_All, Unigene32896_All, Unigene43389_All, Unigene22974_All, Unigene1703_All, Unigene83060_All
cation-transporting ATPase activity		Unigene124239_All, Unigene127147_All, Unigene32119_All, Unigene41408_All, Unigene65521_All, Unigene69403_All
lipid transporter activity		Unigene28771_All, Unigene15839_All, Unigene16064_All
nucleoside binding		Unigene12344_All, Unigene27889_All
succinate-CoA ligase activity		Unigene122962_All, Unigene15869_All
acid-thiol ligase activity		Unigene122962_All, Unigene15869_All
lyase activity		Unigene52581_All, Unigene67762_All, Unigene22327_All, Unigene63464_All, Unigene70720_All, Unigene42754_All, Unigene40663_All, Unigene53195_All, Unigene61185_All, Unigene5766_All, Unigene32119_All, Unigene69013_All, Unigene34251_All, Unigene71966_All, Unigene123670_All, Unigene42573_All, Unigene37194_All, Unigene59804_All, Unigene41408_All, Unigene124514_All, Unigene69403_All, Unigene52305_All
oxidoreductase activity, acting on the aldehyde or oxo group of donors, NAD or NADP as acceptor		Unigene124657_All, Unigene9734_All, Unigene120366_All, Unigene125287_All, Unigene44912_All, Unigene45580_All
primary active transmembrane transporter activity		Unigene124239_All, Unigene5058_All, Unigene9308_All, Unigene65521_All, Unigene127147_All, Unigene16064_All, Unigene6468_All, Unigene103273_All, Unigene40555_All, Unigene15839_All, Unigene62013_All, Unigene32119_All, Unigene7949_All, Unigene125288_All, Unigene2064_All, Unigene28771_All, Unigene68417_All, Unigene41408_All, Unigene69403_All
P-P-bond-hydrolysis-driven transmembrane transporter activity		Unigene124239_All, Unigene5058_All, Unigene9308_All, Unigene65521_All, Unigene127147_All, Unigene16064_All, Unigene6468_All, Unigene103273_All, Unigene40555_All, Unigene15839_All, Unigene62013_All, Unigene32119_All, Unigene7949_All, Unigene125288_All, Unigene2064_All, Unigene28771_All, Unigene68417_All, Unigene41408_All, Unigene69403_All
cation transmembrane transporter activity		Unigene124239_All, Unigene5058_All, Unigene39816_All, Unigene65521_All, Unigene59698_All, Unigene127147_All, Unigene1201_All, Unigene1202_All, Unigene21877_All, Unigene32119_All, Unigene44920_All, Unigene41221_All, Unigene22273_All, Unigene68417_All, Unigene76680_All, Unigene30025_All, Unigene41408_All, Unigene69403_All
solute:hydrogen antiporter activity		Unigene21877_All, Unigene39816_All
ammonia ligase activity		Unigene120324_All, Unigene12289_All
acid-ammonia (or amide) ligase activity		Unigene120324_All, Unigene12289_All
cation channel activity		Unigene41408_All, Unigene69403_All, Unigene44920_All
N-methyltransferase activity		Unigene44514_All, Unigene6575_All, Unigene18409_All, Unigene19093_All
iron-sulfur cluster binding		Unigene14381_All, Unigene9323_All, Unigene37194_All, Unigene22327_All, Unigene53195_All, Unigene70744_All, Unigene52305_All
pyrophosphatase activity		Unigene124129_All, Unigene54741_All, Unigene26955_All, Unigene124239_All, Unigene28153_All, Unigene1021_All, Unigene47703_All, Unigene5058_All, Unigene560_All, Unigene9308_All, Unigene8501_All, Unigene62641_All, Unigene16064_All, Unigene28576_All, Unigene6468_All, Unigene924_All, Unigene15839_All, Unigene62013_All, Unigene7949_All, Unigene125288_All, Unigene79918_All, Unigene28771_All, Unigene640…
UDP-glycosyltransferase activity		Unigene56481_All, Unigene125311_All, Unigene67578_All, Unigene43389_All, Unigene22974_All, Unigene73686_All, Unigene32896_All, Unigene88587_All, Unigene1703_All, Unigene27336_All, Unigene83060_All
O-methyltransferase activity		Unigene4131_All, Unigene60201_All, Unigene40908_All
hydrolase activity, acting on acid anhydrides		Unigene124129_All, Unigene54741_All, Unigene26955_All, Unigene124239_All, Unigene28153_All, Unigene1021_All, Unigene47703_All, Unigene5058_All, Unigene560_All, Unigene9308_All, Unigene8501_All, Unigene62641_All, Unigene16064_All, Unigene28576_All, Unigene6468_All, Unigene924_All, Unigene15839_All, Unigene62013_All, Unigene7949_All, Unigene125288_All, Unigene79918_All, Unigene28771_All, Unigene640…
oxidoreductase activity, acting on paired donors, with incorporation or reduction of molecular oxygen, NADH or NADPH as one donor, and incorporation of one atom of oxygen		Unigene22884_All, Unigene14644_All, Unigene80856_All, Unigene89732_All, Unigene1233_All
hydrolase activity, acting on acid anhydrides, in phosphorus-containing anhydrides		Unigene124129_All, Unigene54741_All, Unigene26955_All, Unigene124239_All, Unigene28153_All, Unigene1021_All, Unigene47703_All, Unigene5058_All, Unigene560_All, Unigene9308_All, Unigene8501_All, Unigene62641_All, Unigene16064_All, Unigene28576_All, Unigene6468_All, Unigene924_All, Unigene15839_All, Unigene62013_All, Unigene7949_All, Unigene125288_All, Unigene79918_All, Unigene28771_All, Unigene640…
oxidoreductase activity, acting on the CH-CH group of donors		Unigene56777_All, Unigene69353_All, Unigene67789_All, Unigene2638_All, Unigene84019_All, Unigene11761_All, Unigene86069_All, Unigene40555_All, Unigene1241_All, Unigene13225_All, Unigene71899_All, Unigene62013_All, Unigene7949_All, Unigene65564_All, Unigene18645_All, Unigene9734_All, Unigene72756_All, Unigene67301_All, Unigene37250_All
carbon-sulfur lyase activity		Unigene42573_All, Unigene71966_All, Unigene5766_All
ligase activity		Unigene27565_All, Unigene44188_All, Unigene44078_All, Unigene27654_All, Unigene54167_All, Unigene120979_All, Unigene1326_All, Unigene16282_All, Unigene5745_All, Unigene12289_All, Unigene15486_All, Unigene45253_All, Unigene73397_All, Unigene37286_All, Unigene120324_All, Unigene52088_All, Unigene59088_All, Unigene34739_All, Unigene42848_All, Unigene44491_All, Unigene14595_All, Unigene15869_All, Uni…
carbon-oxygen lyase activity		Unigene67762_All, Unigene22327_All, Unigene32119_All, Unigene40663_All, Unigene59804_All, Unigene41408_All, Unigene53195_All, Unigene69403_All
ion transmembrane transporter activity		Unigene124239_All, Unigene5058_All, Unigene9308_All, Unigene39816_All, Unigene65521_All, Unigene59698_All, Unigene127147_All, Unigene1201_All, Unigene76048_All, Unigene16064_All, Unigene30245_All, Unigene1202_All, Unigene21877_All, Unigene15839_All, Unigene32119_All, Unigene125288_All, Unigene44920_All, Unigene41221_All, Unigene28771_All, Unigene22273_All, Unigene68417_All, Unigene76680_All, Unig…
carboxy-lyase activity		Unigene52581_All, Unigene124514_All, Unigene69013_All, Unigene34251_All, Unigene61185_All, Unigene42754_All
oxidoreductase activity, acting on the aldehyde or oxo group of donors		Unigene124657_All, Unigene9734_All, Unigene120366_All, Unigene125287_All, Unigene32086_All, Unigene44912_All, Unigene45580_All
RNA binding		Unigene28153_All, Unigene125022_All, Unigene560_All, Unigene124556_All, Unigene26266_All, Unigene8501_All, Unigene30093_All, Unigene59238_All, Unigene125025_All, Unigene88685_All, Unigene5654_All, Unigene123584_All, Unigene76105_All, Unigene25236_All, Unigene124991_All, Unigene81255_All, Unigene2216_All, Unigene26233_All, Unigene76531_All, Unigene41386_All, Unigene124560_All, Unigene64095_All, Un…
RNA polymerase activity		Unigene34314_All, Unigene12344_All, Unigene3028_All, Unigene10130_All, Unigene128020_All, Unigene27889_All
oxidoreductase activity, acting on CH-OH group of donors		Unigene16332_All, Unigene68294_All, Unigene67503_All, Unigene86434_All, Unigene15752_All, Unigene122776_All, Unigene17517_All, Unigene40663_All, Unigene125031_All, Unigene10675_All, Unigene8869_All, Unigene126101_All, Unigene122613_All, Unigene52305_All
protein methyltransferase activity		Unigene44514_All, Unigene6575_All, Unigene18409_All
glucosyltransferase activity		Unigene56481_All, Unigene125311_All, Unigene43389_All, Unigene22974_All, Unigene73686_All, Unigene32896_All, Unigene30095_All, Unigene1703_All, Unigene83060_All
substrate-specific transmembrane transporter activity		Unigene124239_All, Unigene5058_All, Unigene9308_All, Unigene65521_All, Unigene47689_All, Unigene16064_All, Unigene1202_All, Unigene21877_All, Unigene15839_All, Unigene62013_All, Unigene125288_All, Unigene2064_All, Unigene28771_All, Unigene76680_All, Unigene43081_All, Unigene30025_All, Unigene69403_All, Unigene47592_All, Unigene18236_All, Unigene39816_All, Unigene28007_All, Unigene59698_All, Unige…
fatty acid ligase activity		Unigene24935_All, Unigene44491_All
oxidoreductase activity, acting on paired donors, with incorporation or reduction of molecular oxygen		Unigene13365_All, Unigene89732_All, Unigene62022_All, Unigene22884_All, Unigene73393_All, Unigene28529_All, Unigene80856_All, Unigene14644_All, Unigene127208_All, Unigene1233_All
carboxylesterase activity		Unigene504_All, Unigene19939_All, Unigene84088_All, Unigene27618_All, Unigene28567_All, Unigene27654_All
carboxylic ester hydrolase activity		Unigene504_All, Unigene19939_All, Unigene84088_All, Unigene27618_All, Unigene28567_All, Unigene27654_All
translation factor activity, nucleic acid binding		Unigene123584_All, Unigene125022_All, Unigene124556_All, Unigene8501_All, Unigene2216_All, Unigene30093_All, Unigene26233_All, Unigene76531_All, Unigene59238_All, Unigene124560_All, Unigene41386_All, Unigene64095_All, Unigene88685_All, Unigene85488_All
transmembrane transporter activity		Unigene124239_All, Unigene5058_All, Unigene9308_All, Unigene65521_All, Unigene47689_All, Unigene16064_All, Unigene6468_All, Unigene1202_All, Unigene35683_All, Unigene13225_All, Unigene21877_All, Unigene15839_All, Unigene62013_All, Unigene7949_All, Unigene125288_All, Unigene2064_All, Unigene28771_All, Unigene76680_All, Unigene19803_All, Unigene43081_All, Unigene30025_All, Unigene69403_All, Unigene…
metal cluster binding		Unigene14381_All, Unigene95336_All, Unigene22327_All, Unigene70744_All, Unigene37194_All, Unigene9323_All, Unigene53195_All, Unigene52305_All
disulfide oxidoreductase activity		Unigene80716_All, Unigene30439_All, Unigene123551_All
solute:cation antiporter activity		Unigene21877_All, Unigene22273_All, Unigene39816_All
nucleic acid binding transcription factor activity		Unigene73129_All, Unigene29148_All, Unigene59366_All, Unigene59628_All, Unigene28529_All, Unigene27735_All, Unigene7892_All, Unigene1241_All, Unigene40621_All, Unigene5752_All, Unigene42641_All, Unigene56875_All, Unigene32358_All, Unigene29211_All, Unigene29600_All, Unigene125030_All, Unigene1029_All, Unigene67082_All, Unigene54903_All, Unigene38793_All, Unigene40702_All
carbohydrate phosphatase activity		Unigene3913_All, Unigene1703_All
protein tyrosine kinase activity		Unigene49228_All, Unigene1052_All, Unigene127306_All, Unigene80959_All, Unigene72756_All
oxidoreductase activity, acting on the CH-NH2 group of donors, oxygen as acceptor		Unigene46752_All, Unigene16180_All
secondary active transmembrane transporter activity		Unigene35683_All, Unigene60151_All, Unigene21877_All, Unigene3399_All, Unigene39816_All, Unigene41221_All, Unigene22273_All, Unigene19803_All, Unigene76680_All, Unigene30025_All, Unigene72861_All
oxidoreductase activity, acting on the CH-CH group of donors, oxygen as acceptor		Unigene2638_All, Unigene37250_All
oxidoreductase activity, acting on the CH-CH group of donors, NAD or NADP as acceptor		Unigene56777_All, Unigene71899_All, Unigene13225_All, Unigene1241_All, Unigene62013_All, Unigene7949_All, Unigene69353_All, Unigene67789_All, Unigene84019_All, Unigene65564_All, Unigene86069_All, Unigene72756_All, Unigene67301_All, Unigene40555_All
ion channel activity		Unigene41408_All, Unigene69403_All, Unigene30245_All, Unigene44920_All
channel activity		Unigene41408_All, Unigene69403_All, Unigene30245_All, Unigene44920_All
passive transmembrane transporter activity		Unigene41408_All, Unigene69403_All, Unigene30245_All, Unigene44920_All
substrate-specific channel activity		Unigene41408_All, Unigene69403_All, Unigene30245_All, Unigene44920_All
transferase activity, transferring glycosyl groups		Unigene67578_All, Unigene43389_All, Unigene32538_All, Unigene32896_All, Unigene88587_All, Unigene82799_All, Unigene30095_All, Unigene5810_All, Unigene1703_All, Unigene83060_All, Unigene56481_All, Unigene125311_All, Unigene44566_All, Unigene22974_All, Unigene73686_All, Unigene125476_All, Unigene35084_All, Unigene130552_All, Unigene27336_All, Unigene78290_All
hydrogen ion transmembrane transporter activity		Unigene21877_All, Unigene124239_All, Unigene127147_All, Unigene39816_All, Unigene65521_All
transferase activity, transferring hexosyl groups		Unigene56481_All, Unigene125311_All, Unigene67578_All, Unigene43389_All, Unigene22974_All, Unigene73686_All, Unigene32896_All, Unigene32538_All, Unigene125476_All, Unigene30095_All, Unigene1703_All, Unigene83060_All, Unigene78290_All
carbon-carbon lyase activity		Unigene52581_All, Unigene124514_All, Unigene69013_All, Unigene63464_All, Unigene34251_All, Unigene61185_All, Unigene123670_All, Unigene42754_All
catalytic activity		Unigene124129_All, Unigene49228_All, Unigene54741_All, Unigene119607_All, Unigene124239_All, Unigene1021_All, Unigene73072_All, Unigene46752_All, Unigene27780_All, Unigene8501_All, Unigene128020_All, Unigene22571_All, Unigene22884_All, Unigene16282_All, Unigene68065_All, Unigene46307_All, Unigene123617_All, Unigene34141_All, Unigene7949_All, Unigene45679_All, Unigene89258_All, Unigene64175_All, U…
beta-glucosidase activity		Unigene14335_All, Unigene51862_All
monovalent inorganic cation transmembrane transporter activity		Unigene21877_All, Unigene124239_All, Unigene127147_All, Unigene30025_All, Unigene39816_All, Unigene65521_All
oxidoreductase activity, acting on the CH-OH group of donors, NAD or NADP as acceptor		Unigene16332_All, Unigene125031_All, Unigene68294_All, Unigene67503_All, Unigene126101_All, Unigene15752_All, Unigene52305_All, Unigene17517_All, Unigene40663_All
S-adenosylmethionine-dependent methyltransferase activity		Unigene44514_All, Unigene60201_All, Unigene6575_All, Unigene18409_All
guanyl ribonucleotide binding		Unigene124129_All, Unigene560_All, Unigene124556_All, Unigene124502_All, Unigene123584_All, Unigene54387_All, Unigene49040_All, Unigene85725_All, Unigene2216_All, Unigene54388_All, Unigene26233_All, Unigene47586_All, Unigene124560_All, Unigene125312_All, Unigene64095_All, Unigene14632_All, Unigene47592_All
guanyl nucleotide binding		Unigene124129_All, Unigene560_All, Unigene124556_All, Unigene124502_All, Unigene123584_All, Unigene54387_All, Unigene49040_All, Unigene85725_All, Unigene2216_All, Unigene54388_All, Unigene26233_All, Unigene47586_All, Unigene124560_All, Unigene125312_All, Unigene64095_All, Unigene14632_All, Unigene47592_All
ATPase activity, coupled to transmembrane movement of ions, phosphorylative mechanism		Unigene68417_All, Unigene5058_All, Unigene9308_All
lysine N-acetyltransferase activity		Unigene76542_All, Unigene52076_All
inorganic cation transmembrane transporter activity		Unigene21877_All, Unigene124239_All, Unigene68417_All, Unigene127147_All, Unigene30025_All, Unigene39816_All, Unigene65521_All
substrate-specific transporter activity		Unigene124239_All, Unigene5058_All, Unigene9308_All, Unigene65521_All, Unigene47689_All, Unigene16064_All, Unigene1202_All, Unigene21877_All, Unigene15839_All, Unigene62013_All, Unigene125288_All, Unigene2064_All, Unigene28771_All, Unigene76680_All, Unigene43081_All, Unigene30025_All, Unigene69403_All, Unigene47592_All, Unigene18236_All, Unigene39816_All, Unigene28007_All, Unigene27054_All, Unige…
fatty acid synthase activity		Unigene23691_All, Unigene12461_All
carbohydrate transmembrane transporter activity		Unigene19853_All, Unigene41221_All
hydrolase activity, acting on glycosyl bonds		Unigene77977_All, Unigene17266_All, Unigene76118_All, Unigene73831_All, Unigene51862_All, Unigene79970_All, Unigene44869_All, Unigene82670_All, Unigene13808_All, Unigene125420_All, Unigene80594_All, Unigene32793_All, Unigene14335_All, Unigene14331_All, Unigene62606_All, Unigene90435_All, Unigene950_All, Unigene16610_All, Unigene120621_All, Unigene17339_All
peroxidase activity		Unigene13593_All, Unigene9501_All, Unigene78765_All
oxidoreductase activity, acting on peroxide as acceptor		Unigene13593_All, Unigene9501_All, Unigene78765_All
O-acyltransferase activity		Unigene22651_All, Unigene52388_All
symporter activity		Unigene30025_All, Unigene41221_All
solute:cation symporter activity		Unigene30025_All, Unigene41221_All
hydrolase activity, hydrolyzing O-glycosyl compounds		Unigene14335_All, Unigene62606_All, Unigene76118_All, Unigene90435_All, Unigene950_All, Unigene73831_All, Unigene51862_All, Unigene16610_All, Unigene44869_All, Unigene82670_All, Unigene80594_All, Unigene125420_All, Unigene32793_All, Unigene17339_All
antiporter activity		Unigene21877_All, Unigene22273_All, Unigene39816_All
solute:solute antiporter activity		Unigene21877_All, Unigene22273_All, Unigene39816_All
double-stranded DNA binding		Unigene42848_All, Unigene20036_All
transferase activity, transferring one-carbon groups		Unigene4131_All, Unigene3088_All, Unigene44514_All, Unigene60201_All, Unigene6575_All, Unigene30352_All, Unigene40908_All, Unigene18409_All, Unigene94313_All, Unigene19093_All, Unigene59383_All, Unigene62461_All, Unigene32195_All, Unigene44300_All, Unigene14112_All
transporter activity		Unigene124239_All, Unigene5058_All, Unigene9308_All, Unigene65521_All, Unigene47689_All, Unigene16064_All, Unigene6468_All, Unigene1202_All, Unigene35683_All, Unigene13225_All, Unigene21877_All, Unigene15839_All, Unigene62013_All, Unigene7949_All, Unigene125288_All, Unigene2064_All, Unigene28771_All, Unigene76680_All, Unigene19803_All, Unigene43081_All, Unigene30025_All, Unigene69403_All, Unigene…
endoribonuclease activity, producing 5'-phosphomonoesters		Unigene28153_All, Unigene73817_All, Unigene5654_All
oxidoreductase activity, acting on diphenols and related substances as donors, oxygen as acceptor		Unigene27849_All, Unigene27851_All
NADH dehydrogenase (quinone) activity		Unigene59174_All, Unigene70744_All
endonuclease activity, active with either ribo- or deoxyribonucleic acids and producing 5'-phosphomonoesters		Unigene28153_All, Unigene73817_All, Unigene5654_All
N-acetyltransferase activity		Unigene76542_All, Unigene52076_All
lipase activity		Unigene79583_All, Unigene47610_All
oxidoreductase activity, acting on diphenols and related substances as donors		Unigene27849_All, Unigene27851_All
phospholipid binding		Unigene79583_All, Unigene69093_All, Unigene69091_All
methyltransferase activity		Unigene4131_All, Unigene44514_All, Unigene60201_All, Unigene6575_All, Unigene40908_All, Unigene18409_All, Unigene19093_All, Unigene14112_All, Unigene44300_All
endoribonuclease activity		Unigene28153_All, Unigene73817_All, Unigene5654_All
NADH dehydrogenase activity		Unigene59174_All, Unigene70744_All
inorganic anion transmembrane transporter activity		Unigene76048_All, Unigene1115_All
transaminase activity		Unigene42573_All, Unigene51689_All
purine nucleotide binding		Unigene124129_All, Unigene56777_All, Unigene49228_All, Unigene54741_All, Unigene27565_All, Unigene124239_All, Unigene28153_All, Unigene52581_All, Unigene1021_All, Unigene47703_All, Unigene560_All, Unigene27780_All, Unigene8501_All, Unigene47486_All, Unigene32135_All, Unigene62641_All, Unigene30267_All, Unigene3350_All, Unigene16282_All, Unigene16064_All, Unigene73257_All, Unigene28576_All, Unigen…
enzyme binding		Unigene120803_All, Unigene85565_All, Unigene12841_All
nucleotide binding		Unigene124129_All, Unigene56777_All, Unigene49228_All, Unigene54741_All, Unigene124239_All, Unigene52581_All, Unigene1021_All, Unigene560_All, Unigene27780_All, Unigene8501_All, Unigene47486_All, Unigene62641_All, Unigene3350_All, Unigene16282_All, Unigene16064_All, Unigene73257_All, Unigene6468_All, Unigene124948_All, Unigene28735_All, Unigene7949_All, Unigene125288_All, Unigene79918_All, Unigen…
oxidoreductase activity, acting on single donors with incorporation of molecular oxygen		Unigene82645_All, Unigene24935_All, Unigene68013_All, Unigene22656_All
N-acyltransferase activity		Unigene76542_All, Unigene52076_All
ribonuclease activity		Unigene28153_All, Unigene73817_All, Unigene5654_All
glucosidase activity		Unigene14335_All, Unigene82670_All, Unigene51862_All
small GTPase regulator activity		Unigene70636_All, Unigene16273_All
helicase activity		Unigene2813_All, Unigene62641_All
adenylyltransferase activity		Unigene123584_All, Unigene121063_All
endonuclease activity		Unigene28153_All, Unigene73817_All, Unigene5654_All
oxidoreductase activity, acting on a sulfur group of donors		Unigene80716_All, Unigene30439_All, Unigene123551_All
lipid binding		Unigene79583_All, Unigene69093_All, Unigene69091_All
transferase activity, transferring nitrogenous groups		Unigene42573_All, Unigene51689_All
ribonucleotide binding		Unigene124129_All, Unigene56777_All, Unigene49228_All, Unigene54741_All, Unigene27565_All, Unigene124239_All, Unigene28153_All, Unigene1021_All, Unigene47703_All, Unigene560_All, Unigene27780_All, Unigene8501_All, Unigene32135_All, Unigene62641_All, Unigene30267_All, Unigene3350_All, Unigene16282_All, Unigene16064_All, Unigene73257_All, Unigene28576_All, Unigene6468_All, Unigene924_All, Unigene26…
purine ribonucleotide binding		Unigene124129_All, Unigene56777_All, Unigene49228_All, Unigene54741_All, Unigene27565_All, Unigene124239_All, Unigene28153_All, Unigene1021_All, Unigene47703_All, Unigene560_All, Unigene27780_All, Unigene8501_All, Unigene32135_All, Unigene62641_All, Unigene30267_All, Unigene3350_All, Unigene16282_All, Unigene16064_All, Unigene73257_All, Unigene28576_All, Unigene6468_All, Unigene924_All, Unigene26…
adenyl nucleotide binding		Unigene56777_All, Unigene49228_All, Unigene54741_All, Unigene27565_All, Unigene124239_All, Unigene28153_All, Unigene1021_All, Unigene47703_All, Unigene27780_All, Unigene8501_All, Unigene47486_All, Unigene32135_All, Unigene62641_All, Unigene30267_All, Unigene3350_All, Unigene16282_All, Unigene16064_All, Unigene73257_All, Unigene28576_All, Unigene6468_All, Unigene924_All, Unigene26626_All, Unigene1…
structure-specific DNA binding		Unigene42848_All, Unigene20036_All
protein kinase activity		Unigene49228_All, Unigene27780_All, Unigene31965_All, Unigene10067_All, Unigene27600_All, Unigene32135_All, Unigene3350_All, Unigene127306_All, Unigene68065_All, Unigene42659_All, Unigene86475_All, Unigene26626_All, Unigene30052_All, Unigene3084_All, Unigene16476_All, Unigene40967_All, Unigene125331_All, Unigene28732_All, Unigene14340_All, Unigene52898_All, Unigene16489_All, Unigene16645_All, Uni…
GTPase regulator activity		Unigene70636_All, Unigene16273_All
nucleoside-triphosphatase regulator activity		Unigene70636_All, Unigene16273_All
enzyme regulator activity		Unigene12921_All, Unigene70636_All, Unigene16273_All, Unigene59480_All, Unigene45206_All
adenyl ribonucleotide binding		Unigene56777_All, Unigene49228_All, Unigene54741_All, Unigene27565_All, Unigene124239_All, Unigene28153_All, Unigene1021_All, Unigene47703_All, Unigene27780_All, Unigene8501_All, Unigene32135_All, Unigene62641_All, Unigene30267_All, Unigene3350_All, Unigene16282_All, Unigene16064_All, Unigene73257_All, Unigene28576_All, Unigene6468_All, Unigene924_All, Unigene26626_All, Unigene15839_All, Unigene6…
exopeptidase activity		Unigene72756_All, Unigene18851_All, Unigene120020_All
acetyltransferase activity		Unigene76542_All, Unigene28762_All, Unigene52076_All
kinase activity		Unigene49228_All, Unigene44468_All, Unigene27654_All, Unigene27780_All, Unigene31965_All, Unigene10067_All, Unigene27600_All, Unigene32135_All, Unigene6920_All, Unigene3350_All, Unigene127306_All, Unigene68065_All, Unigene42659_All, Unigene86475_All, Unigene26626_All, Unigene30052_All, Unigene3084_All, Unigene16476_All, Unigene16488_All, Unigene40967_All, Unigene64175_All, Unigene125331_All, Unig…
oxidoreductase activity, acting on NADH or NADPH, quinone or similar compound as acceptor		Unigene59174_All, Unigene70744_All
intramolecular transferase activity		Unigene22327_All, Unigene81054_All
DNA binding		Unigene1241_All, Unigene489_All, Unigene119494_All, Unigene5752_All, Unigene42848_All, Unigene20036_All, Unigene30093_All, Unigene32358_All, Unigene54503_All, Unigene59628_All, Unigene54904_All, Unigene1029_All, Unigene54903_All, Unigene40702_All
anion transmembrane transporter activity		Unigene76048_All, Unigene1115_All, Unigene47592_All
transferase activity, transferring acyl groups		Unigene16332_All, Unigene28762_All, Unigene34423_All, Unigene22651_All, Unigene52388_All, Unigene76542_All, Unigene23691_All, Unigene12461_All, Unigene52076_All, Unigene122962_All
phosphotransferase activity, alcohol group as acceptor		Unigene49228_All, Unigene27780_All, Unigene31965_All, Unigene10067_All, Unigene27600_All, Unigene32135_All, Unigene3350_All, Unigene127306_All, Unigene68065_All, Unigene42659_All, Unigene86475_All, Unigene26626_All, Unigene30052_All, Unigene3084_All, Unigene16476_All, Unigene40967_All, Unigene125331_All, Unigene28732_All, Unigene14340_All, Unigene52898_All, Unigene16489_All, Unigene16645_All, Uni…
identical protein binding		Unigene128716_All, Unigene35966_All
cofactor binding		Unigene125031_All, Unigene51553_All, Unigene67503_All, Unigene83632_All, Unigene70744_All, Unigene71966_All, Unigene17517_All
cis-trans isomerase activity		Unigene34623_All, Unigene120803_All
transferase activity, transferring acyl groups other than amino-acyl groups		Unigene28762_All, Unigene34423_All, Unigene22651_All, Unigene52388_All, Unigene76542_All, Unigene23691_All, Unigene12461_All, Unigene52076_All
nuclease activity		Unigene28153_All, Unigene5297_All, Unigene59104_All, Unigene10130_All, Unigene73817_All, Unigene89258_All, Unigene5654_All
protein serine/threonine kinase activity		Unigene80959_All, Unigene27780_All, Unigene18994_All, Unigene32135_All, Unigene2115_All, Unigene18351_All, Unigene28732_All, Unigene32146_All, Unigene15414_All
signal transducer activity		Unigene770_All, Unigene28531_All, Unigene560_All, Unigene80959_All, Unigene27325_All, Unigene54388_All, Unigene85615_All, Unigene32135_All, Unigene1052_All, Unigene28702_All, Unigene32146_All, Unigene72756_All, Unigene78910_All, Unigene46751_All
isomerase activity		Unigene22571_All, Unigene34623_All, Unigene120803_All, Unigene22327_All, Unigene8338_All, Unigene11579_All, Unigene86406_All, Unigene81054_All
molecular transducer activity		Unigene770_All, Unigene28531_All, Unigene560_All, Unigene80959_All, Unigene27325_All, Unigene54388_All, Unigene85615_All, Unigene32135_All, Unigene1052_All, Unigene42041_All, Unigene28702_All, Unigene32146_All, Unigene72756_All, Unigene78910_All, Unigene46751_All
receptor signaling protein serine/threonine kinase activity		Unigene80959_All, Unigene32146_All
receptor signaling protein activity		Unigene80959_All, Unigene32146_All
phosphatase activity		Unigene1638_All, Unigene25528_All, Unigene27866_All, Unigene22298_All, Unigene3913_All, Unigene1703_All, Unigene54293_All
receptor activity		Unigene54388_All, Unigene46751_All
oxidoreductase activity, acting on NADH or NADPH		Unigene59174_All, Unigene70744_All
transferase activity		Unigene49228_All, Unigene44514_All, Unigene27780_All, Unigene128020_All, Unigene3350_All, Unigene127306_All, Unigene68065_All, Unigene83060_All, Unigene79606_All, Unigene6575_All, Unigene124304_All, Unigene45679_All, Unigene64175_All, Unigene78910_All, Unigene14340_All, Unigene52898_All, Unigene16489_All, Unigene82906_All, Unigene16645_All, Unigene4131_All, Unigene60201_All, Unigene17477_All, Uni…
hydrolase activity, acting on ester bonds		Unigene79583_All, Unigene1638_All, Unigene10889_All, Unigene28153_All, Unigene27654_All, Unigene54715_All, Unigene59104_All, Unigene19939_All, Unigene5297_All, Unigene28567_All, Unigene1703_All, Unigene73817_All, Unigene5654_All, Unigene27866_All, Unigene27618_All, Unigene84088_All, Unigene76926_All, Unigene10130_All, Unigene89258_All, Unigene504_All, Unigene25528_All, Unigene47610_All, Unigene22…
protein binding		Unigene56777_All, Unigene84042_All, Unigene59480_All, Unigene92920_All, Unigene76771_All, Unigene30267_All, Unigene120803_All, Unigene138850_All, Unigene16064_All, Unigene54215_All, Unigene80966_All, Unigene59575_All, Unigene23611_All, Unigene81393_All, Unigene32119_All, Unigene42848_All, Unigene12841_All, Unigene2064_All, Unigene34314_All, Unigene128716_All, Unigene34623_All, Unigene35966_All, U…
hydrolase activity		Unigene124129_All, Unigene54741_All, Unigene119607_All, Unigene124239_All, Unigene1021_All, Unigene560_All, Unigene9308_All, Unigene8501_All, Unigene92920_All, Unigene62641_All, Unigene127306_All, Unigene16064_All, Unigene6468_All, Unigene123617_All, Unigene34141_All, Unigene7949_All, Unigene125288_All, Unigene89258_All, Unigene504_All, Unigene79918_All, Unigene2108_All, Unigene54293_All, Unigene…
phosphoric ester hydrolase activity		Unigene1638_All, Unigene25528_All, Unigene27866_All, Unigene22298_All, Unigene3913_All, Unigene1703_All, Unigene54293_All
peptidase activity		Unigene23077_All, Unigene124253_All, Unigene68140_All, Unigene92920_All, Unigene18851_All, Unigene123617_All, Unigene120581_All, Unigene46469_All, Unigene34141_All, Unigene8317_All, Unigene124095_All, Unigene68417_All, Unigene72756_All, Unigene120020_All, Unigene8171_All, Unigene1397_All
transferase activity, transferring phosphorus-containing groups		Unigene49228_All, Unigene27780_All, Unigene27600_All, Unigene128020_All, Unigene32135_All, Unigene6920_All, Unigene3350_All, Unigene127306_All, Unigene68065_All, Unigene12344_All, Unigene86475_All, Unigene26626_All, Unigene59940_All, Unigene16476_All, Unigene85615_All, Unigene64175_All, Unigene125331_All, Unigene78910_All, Unigene14340_All, Unigene52898_All, Unigene16489_All, Unigene16645_All, Un…
endopeptidase activity		Unigene124095_All, Unigene68417_All, Unigene34141_All, Unigene68140_All, Unigene8317_All, Unigene92920_All
peptidase activity, acting on L-amino acid peptides		Unigene23077_All, Unigene34141_All, Unigene68140_All, Unigene8317_All, Unigene92920_All, Unigene124095_All, Unigene68417_All, Unigene72756_All, Unigene120020_All, Unigene18851_All, Unigene1397_All
binding		Unigene49228_All, Unigene54741_All, Unigene73072_All, Unigene27780_All, Unigene8501_All, Unigene128020_All, Unigene16282_All, Unigene7892_All, Unigene82739_All, Unigene46307_All, Unigene6306_All, Unigene37348_All, Unigene124991_All, Unigene5196_All, Unigene89258_All, Unigene64175_All, Unigene79918_All, Unigene29600_All, Unigene84941_All, Unigene34909_All, Unigene77977_All, Unigene28185_All, Unige…
nucleotidyltransferase activity		Unigene123584_All, Unigene59940_All, Unigene3028_All, Unigene67429_All, Unigene10130_All, Unigene128020_All, Unigene27889_All, Unigene34314_All, Unigene12344_All, Unigene28387_All, Unigene6547_All, Unigene13815_All, Unigene73817_All, Unigene121063_All
nucleic acid binding		Unigene60317_All, Unigene28153_All, Unigene1021_All, Unigene560_All, Unigene26266_All, Unigene125058_All, Unigene8501_All, Unigene120818_All, Unigene3875_All, Unigene128020_All, Unigene59238_All, Unigene54503_All, Unigene59628_All, Unigene38726_All, Unigene12344_All, Unigene7892_All, Unigene23163_All, Unigene6468_All, Unigene6502_All, Unigene59940_All, Unigene76105_All, Unigene28735_All, Unigene2…
DNA polymerase activity		Unigene59940_All, Unigene28387_All, Unigene6547_All, Unigene10130_All, Unigene73817_All
