# Supplementary material for: Global Transcriptome Profiling of Salicornia europaea L. Shoots under NaCl Treatment
Source: PLoS One. 2013 Jun 25;8(6):e65877. doi: 10.1371/journal.pone.0065877 (PMC3692491; doi:10.1371/journal.pone.0065877)
Supplement: Additional File S9 — Summary of DEGs enriched in KEGG pathways. Pathways and backbone gene numbers are given in the table. The q-values for all pathways are less than or equal to 0.05. (XLS) [file pone.0065877.s009.xls]

#Pathway	Se200S-vs-SeCKS (1094)	All-Unigene (25907)	Pvalue	Qvalue	Pathway ID	Genes	KOs
Ribosome	140	1594	7.89E-17	7.97E-15	ko03010	Unigene11216_All;Unigene11409_All;Unigene11760_All;Unigene119556_All;Unigene120351_All;Unigene120671_All;Unigene120679_All;Unigene120689_All;Unigene120696_All;Unigene120705_All;Unigene120818_All;Unigene121581_All;Unigene121583_All;Unigene121623_All;Unigene121628_All;Unigene121654_All;Unigene121663_All;Unigene121974_All;Unigene122003_All;Unigene122013_All;Unigene122523_All;Unigene122695_All;Unigen…	K02900+K02917+K02934+K02977+K02912+K02923+K02898+K02872+K02980+K02883+K02981+K02984+K02894+K02976+K02882+K02868+K02998+K02983+K02938+K02873+K02896+K02880+K02966+K02987+K02989+K02985+K02969+K02928+K02932+K02974+K02941+K02903+K02957+K02991+K02915+K02962+K02975+K02997+K02901+K02955+K02866+K02942+K02936+K02927+K02995+K02910+K02889+K02918+K02922+K02870+K02958+K02885+K02924+K02978+K02920+K02940+K02953+…
RNA polymerase	44	419	3.07E-08	1.55E-06	ko03020	Unigene10582_All;Unigene11033_All;Unigene120245_All;Unigene120503_All;Unigene121580_All;Unigene121650_All;Unigene12344_All;Unigene124159_All;Unigene124253_All;Unigene125331_All;Unigene128020_All;Unigene17954_All;Unigene21335_All;Unigene23101_All;Unigene27889_All;Unigene3028_All;Unigene32988_All;Unigene34314_All;Unigene35708_All;Unigene39849_All;Unigene49635_All;Unigene51092_All;Unigene57011_All;U…	K03006+K03046+K03043+K03007+K03021+K03022+K02999+K03040+K03026+K03002+K03010+K03018
Biosynthesis of unsaturated fatty acids	23	172	1.05E-06	2.96E-05	ko01040	Unigene124947_All;Unigene126004_All;Unigene127208_All;Unigene12735_All;Unigene18935_All;Unigene20271_All;Unigene20302_All;Unigene22017_All;Unigene23691_All;Unigene24033_All;Unigene2638_All;Unigene36802_All;Unigene37250_All;Unigene38193_All;Unigene4679_All;Unigene4680_All;Unigene48717_All;Unigene60863_All;Unigene62022_All;Unigene62997_All;Unigene73393_All;Unigene76076_All;Unigene81592_All	K00507+K00059+K00232+K10256
Phenylpropanoid biosynthesis	49	557	1.17E-06	2.96E-05	ko00940	Unigene1174_All;Unigene1176_All;Unigene120366_All;Unigene1233_All;Unigene124543_All;Unigene126664_All;Unigene132811_All;Unigene14331_All;Unigene14335_All;Unigene16332_All;Unigene17146_All;Unigene17660_All;Unigene19025_All;Unigene24935_All;Unigene25456_All;Unigene31670_All;Unigene34217_All;Unigene34276_All;Unigene40085_All;Unigene40908_All;Unigene41003_All;Unigene44300_All;Unigene44544_All;Unigene…	K13065+K12355+K00487+K00083+K00430+K01188+K01904+K13066+K12356+K09753+K03782
Pyrimidine metabolism	51	657	2.39E-05	4.84E-04	ko00240	Unigene10130_All;Unigene10582_All;Unigene11033_All;Unigene120245_All;Unigene120503_All;Unigene121580_All;Unigene121650_All;Unigene12344_All;Unigene124159_All;Unigene124253_All;Unigene125331_All;Unigene125963_All;Unigene128020_All;Unigene16281_All;Unigene16282_All;Unigene17954_All;Unigene21335_All;Unigene22298_All;Unigene23101_All;Unigene27889_All;Unigene30285_All;Unigene3028_All;Unigene30954_All;…	K02320+K03006+K03046+K03043+K00940+K03007+K01955+K03787+K03021+K03022+K00876+K02999+K03040+K03026+K03002+K03010+K03018
Metabolic pathways	322	6304	4.70E-05	7.91E-04	ko01100	Unigene10130_All;Unigene10582_All;Unigene10675_All;Unigene107830_All;Unigene11033_All;Unigene115626_All;Unigene11579_All;Unigene120245_All;Unigene120324_All;Unigene120366_All;Unigene120503_All;Unigene120747_All;Unigene120979_All;Unigene121127_All;Unigene121203_All;Unigene121353_All;Unigene121580_All;Unigene121593_All;Unigene121605_All;Unigene121650_All;Unigene121803_All;Unigene121958_All;Unigene1…	K02320+K03006+K00122+K05280+K12447+K00451+K01858+K01915+K00128+K03781+K01895+K10717+K00264+K01624+K01610+K00963+K01184+K00164+K00026+K01899+K00487+K03046+K03043+K00517+K02132+K11517+K13953+K00083+K00873+K01897+K09841+K00033+K01190+K12309+K00700+K02136+K02155+K00600+K00412+K01803+K00002+K00940+K00059+K00558+K02137+K00058+K08081+K02111+K03007+K01762+K00430+K00500+K00975+K05286+K01968+K00088+K01648+…
Carbon fixation in photosynthetic organisms	24	257	0.00025092	3.62E-03	ko00710	Unigene121580_All;Unigene121593_All;Unigene122613_All;Unigene123670_All;Unigene124514_All;Unigene124595_All;Unigene125899_All;Unigene20373_All;Unigene34251_All;Unigene38590_All;Unigene3913_All;Unigene4377_All;Unigene4378_All;Unigene51689_All;Unigene52581_All;Unigene58227_All;Unigene66380_All;Unigene70048_All;Unigene71309_All;Unigene72097_All;Unigene81623_All;Unigene81758_All;Unigene87915_All;Unig…	K01624+K01610+K00026+K00873+K01803+K00615+K03841+K01602+K00813+K00029+K01006+K01601
Purine metabolism	51	727	0.00029752	3.76E-03	ko00230	Unigene10130_All;Unigene10582_All;Unigene11033_All;Unigene120245_All;Unigene120503_All;Unigene121580_All;Unigene121650_All;Unigene12344_All;Unigene124159_All;Unigene124253_All;Unigene124595_All;Unigene125331_All;Unigene125963_All;Unigene128020_All;Unigene15752_All;Unigene17954_All;Unigene21335_All;Unigene22298_All;Unigene23101_All;Unigene27889_All;Unigene3028_All;Unigene32195_All;Unigene32988_All…	K02320+K03006+K03046+K03043+K00873+K00940+K03007+K00088+K03787+K03021+K03022+K00601+K02999+K03040+K01952+K03026+K03002+K03010+K03018
Flavonoid biosynthesis	23	251	0.000437361	4.91E-03	ko00941	Unigene107830_All;Unigene1174_All;Unigene1176_All;Unigene1233_All;Unigene17146_All;Unigene22884_All;Unigene31958_All;Unigene45098_All;Unigene46267_All;Unigene48629_All;Unigene53460_All;Unigene53467_All;Unigene53472_All;Unigene53479_All;Unigene58193_All;Unigene61065_All;Unigene63756_All;Unigene67502_All;Unigene67503_All;Unigene70679_All;Unigene70840_All;Unigene78581_All;Unigene80199_All	K05280+K13065+K00487+K00660+K05277+K13081+K13082+K08695+K00475+K05278+K13083
Biosynthesis of secondary metabolites	186	3507	0.000511633	5.17E-03	ko01110	Unigene107830_All;Unigene11579_All;Unigene1174_All;Unigene1176_All;Unigene120366_All;Unigene120979_All;Unigene121127_All;Unigene121203_All;Unigene121580_All;Unigene121593_All;Unigene121605_All;Unigene121958_All;Unigene122613_All;Unigene122962_All;Unigene1233_All;Unigene123517_All;Unigene123670_All;Unigene124514_All;Unigene124543_All;Unigene124595_All;Unigene12461_All;Unigene125031_All;Unigene1252…	K05280+K01858+K13065+K00128+K01895+K10717+K00264+K01624+K00120+K01610+K00963+K00164+K00026+K01899+K00487+K00517+K13953+K00083+K00873+K13070+K09841+K00033+K00600+K01803+K00002+K00940+K08081+K01762+K00430+K01188+K00088+K01648+K00514+K00134+K10760+K05356+K00249+K00422+K04124+K03787+K01703+K02548+K01904+K00064+K01641+K00601+K01657+K01681+K00615+K03841+K13832+K13066+K00133+K05933+K01785+K00813+K02160+…
Glycolysis / Gluconeogenesis	33	442	0.001201793	1.10E-02	ko00010	Unigene120366_All;Unigene120979_All;Unigene121580_All;Unigene121593_All;Unigene123670_All;Unigene124514_All;Unigene124543_All;Unigene124595_All;Unigene125287_All;Unigene125899_All;Unigene125911_All;Unigene126664_All;Unigene17009_All;Unigene19025_All;Unigene20373_All;Unigene34251_All;Unigene37982_All;Unigene3913_All;Unigene46307_All;Unigene49283_All;Unigene52088_All;Unigene52581_All;Unigene66240_A…	K00128+K01895+K01624+K01610+K13953+K00873+K01803+K00002+K00134+K03841+K01785+K01834+K00121+K01810+K00844
Stilbenoid, diarylheptanoid and gingerol biosynthesis	27	342	0.0014601	1.23E-02	ko00945	Unigene1174_All;Unigene1176_All;Unigene1233_All;Unigene123517_All;Unigene14644_All;Unigene1494_All;Unigene16396_All;Unigene17146_All;Unigene19811_All;Unigene22884_All;Unigene31958_All;Unigene42239_All;Unigene42241_All;Unigene45098_All;Unigene46267_All;Unigene48629_All;Unigene5367_All;Unigene5770_All;Unigene63756_All;Unigene69377_All;Unigene69860_All;Unigene73942_All;Unigene74856_All;Unigene78581_…	K13065+K00487+K00517
Other glycan degradation	10	82	0.002349971	1.83E-02	ko00511	Unigene125420_All;Unigene17874_All;Unigene18108_All;Unigene32234_All;Unigene56071_All;Unigene56215_All;Unigene73831_All;Unigene87036_All;Unigene87377_All;Unigene950_All	K01190+K12309+K01444+K01191+K12311
Limonene and pinene degradation	26	344	0.003203913	2.31E-02	ko00903	Unigene120366_All;Unigene121580_All;Unigene123517_All;Unigene125287_All;Unigene14644_All;Unigene1494_All;Unigene16396_All;Unigene19811_All;Unigene22884_All;Unigene31958_All;Unigene37982_All;Unigene42239_All;Unigene42241_All;Unigene45098_All;Unigene5367_All;Unigene5770_All;Unigene66240_All;Unigene69377_All;Unigene69860_All;Unigene69900_All;Unigene73942_All;Unigene74856_All;Unigene78581_All;Unigene…	K00128+K00120+K00517
Peroxisome	28	393	0.005167787	3.48E-02	ko04146	Unigene120747_All;Unigene124517_All;Unigene124619_All;Unigene124908_All;Unigene125328_All;Unigene126968_All;Unigene1352_All;Unigene16993_All;Unigene18935_All;Unigene20311_All;Unigene2638_All;Unigene37250_All;Unigene38845_All;Unigene44491_All;Unigene48717_All;Unigene53498_All;Unigene57232_All;Unigene57233_All;Unigene61185_All;Unigene62997_All;Unigene65563_All;Unigene71338_All;Unigene7554_All;Unige…	K03781+K11517+K01897+K04565+K13237+K03426+K00232+K11147+K12261+K11187+K08764+K13335
Phenylalanine metabolism	25	341	0.005582951	3.49E-02	ko00360	Unigene1233_All;Unigene132811_All;Unigene13365_All;Unigene17660_All;Unigene24935_All;Unigene31670_All;Unigene34217_All;Unigene34276_All;Unigene40085_All;Unigene41003_All;Unigene44544_All;Unigene44631_All;Unigene45027_All;Unigene5020_All;Unigene51689_All;Unigene58408_All;Unigene58769_All;Unigene62904_All;Unigene64686_All;Unigene6583_All;Unigene70662_All;Unigene71966_All;Unigene78765_All;Unigene861…	K00487+K00430+K00500+K01904+K00813+K00815+K03782
Flavone and flavonol biosynthesis	10	93	0.005866005	3.49E-02	ko00944	Unigene107830_All;Unigene22884_All;Unigene30776_All;Unigene31958_All;Unigene44300_All;Unigene45098_All;Unigene57837_All;Unigene60201_All;Unigene72208_All;Unigene78581_All	K05280+K05279+K13083
Fatty acid metabolism	19	254	0.01182719	6.64E-02	ko00071	Unigene120366_All;Unigene124543_All;Unigene124619_All;Unigene125287_All;Unigene126664_All;Unigene18645_All;Unigene18935_All;Unigene19025_All;Unigene2638_All;Unigene37250_All;Unigene37982_All;Unigene44491_All;Unigene46307_All;Unigene53498_All;Unigene62997_All;Unigene66240_All;Unigene69900_All;Unigene76076_All;Unigene84035_All	K00128+K13953+K01897+K00249+K00232+K00121
Glyoxylate and dicarboxylate metabolism	16	211	0.01759226	9.35E-02	ko00630	Unigene10675_All;Unigene122613_All;Unigene122776_All;Unigene124517_All;Unigene125328_All;Unigene18700_All;Unigene21171_All;Unigene37194_All;Unigene4377_All;Unigene4378_All;Unigene52305_All;Unigene53195_All;Unigene63464_All;Unigene66380_All;Unigene71309_All;Unigene72097_All	K00122+K00026+K11517+K01455+K01433+K01681+K01602+K01637+K01601
Tryptophan metabolism	17	256	0.04472314	2.26E-01	ko00380	Unigene120366_All;Unigene120747_All;Unigene121958_All;Unigene125287_All;Unigene14644_All;Unigene20311_All;Unigene21192_All;Unigene32086_All;Unigene33735_All;Unigene37982_All;Unigene59084_All;Unigene66240_All;Unigene69900_All;Unigene78765_All;Unigene80449_All;Unigene83241_All;Unigene89732_All	K00128+K03781+K00164+K11868+K11816+K11821+K03782+K01237
Circadian rhythm - plant	16	239	0.04742611	2.28E-01	ko04712	Unigene17811_All;Unigene29992_All;Unigene40275_All;Unigene49228_All;Unigene53460_All;Unigene53467_All;Unigene53472_All;Unigene53479_All;Unigene54903_All;Unigene54904_All;Unigene54905_All;Unigene59480_All;Unigene6394_All;Unigene745_All;Unigene80199_All;Unigene80966_All	K12135+K12126+K12132+K00660+K12133+K12134+K03115+K12130+K12129+K12128+K12124
alpha-Linolenic acid metabolism	10	134	0.05783695	2.66E-01	ko00592	Unigene18935_All;Unigene2638_All;Unigene37250_All;Unigene44188_All;Unigene45263_All;Unigene62997_All;Unigene68013_All;Unigene70720_All;Unigene76076_All;Unigene79606_All	K00232+K10526+K01723+K00454+K08241
Fatty acid biosynthesis	8	100	0.06099111	2.68E-01	ko00061	Unigene126004_All;Unigene12735_All;Unigene20302_All;Unigene23691_All;Unigene24033_All;Unigene38193_All;Unigene48717_All;Unigene52650_All	K00059+K02160
Galactose metabolism	11	156	0.06696178	2.82E-01	ko00052	Unigene121605_All;Unigene125420_All;Unigene17874_All;Unigene18108_All;Unigene4591_All;Unigene56071_All;Unigene75167_All;Unigene76118_All;Unigene87377_All;Unigene87636_All;Unigene950_All	K00963+K01190+K12309+K01193+K00844
Oxidative phosphorylation	28	497	0.07562685	3.06E-01	ko00190	Unigene124239_All;Unigene125632_All;Unigene125698_All;Unigene125897_All;Unigene126042_All;Unigene127147_All;Unigene17796_All;Unigene17797_All;Unigene23924_All;Unigene26191_All;Unigene37634_All;Unigene40222_All;Unigene51270_All;Unigene51553_All;Unigene52254_All;Unigene52599_All;Unigene53285_All;Unigene57683_All;Unigene59174_All;Unigene62856_All;Unigene6336_All;Unigene66057_All;Unigene66231_All;Uni…	K02132+K02136+K02155+K00412+K02137+K02111+K00413+K01507+K02256+K03878+K03885+K05576+K01535+K02138+K03942+K02133+K05580+K02265
Pyruvate metabolism	19	319	0.08434921	3.28E-01	ko00620	Unigene120366_All;Unigene120979_All;Unigene121593_All;Unigene122613_All;Unigene124514_All;Unigene124595_All;Unigene125287_All;Unigene34251_All;Unigene37982_All;Unigene52088_All;Unigene52581_All;Unigene52650_All;Unigene58227_All;Unigene66240_All;Unigene66380_All;Unigene69900_All;Unigene70048_All;Unigene87891_All;Unigene8869_All	K00128+K01895+K01610+K00026+K00873+K02160+K00029+K01006+K01649
Glycosphingolipid biosynthesis - ganglio series	4	41	0.09353183	3.50E-01	ko00604	Unigene125420_All;Unigene56071_All;Unigene87377_All;Unigene950_All	K12309
Glycerolipid metabolism	11	171	0.1095541	3.72E-01	ko00561	Unigene120366_All;Unigene125287_All;Unigene125911_All;Unigene22651_All;Unigene37982_All;Unigene66240_All;Unigene69900_All;Unigene70584_All;Unigene85563_All;Unigene86579_All;Unigene88580_All	K00128+K00002+K00655+K00864
Fructose and mannose metabolism	11	171	0.1095541	3.72E-01	ko00051	Unigene121580_All;Unigene123670_All;Unigene125899_All;Unigene20373_All;Unigene3913_All;Unigene66293_All;Unigene81054_All;Unigene81623_All;Unigene81758_All;Unigene83100_All;Unigene87636_All	K01624+K01803+K03841+K00009+K01840+K00100+K00844
Nitrogen metabolism	9	133	0.1106046	3.72E-01	ko00910	Unigene120324_All;Unigene121203_All;Unigene12289_All;Unigene14381_All;Unigene18700_All;Unigene59804_All;Unigene70095_All;Unigene70174_All;Unigene89341_All	K01915+K00264+K00284+K01455+K01673+K00360
Glycosaminoglycan degradation	5	63	0.1267319	4.13E-01	ko00531	Unigene125420_All;Unigene41061_All;Unigene56071_All;Unigene87377_All;Unigene950_All	K12309+K10532
Benzoxazinoid biosynthesis	5	65	0.1394104	4.40E-01	ko00402	Unigene30776_All;Unigene35084_All;Unigene60201_All;Unigene70840_All;Unigene89732_All	K13230+K13228+K13227+K13229+K13223
Inositol phosphate metabolism	11	183	0.1527218	4.61E-01	ko00562	Unigene11579_All;Unigene125899_All;Unigene20373_All;Unigene22571_All;Unigene40178_All;Unigene56199_All;Unigene61181_All;Unigene69970_All;Unigene81623_All;Unigene82645_All;Unigene87725_All	K01858+K01803+K05857+K00888+K01092+K00469
Sphingolipid metabolism	6	86	0.1557613	4.61E-01	ko00600	Unigene125420_All;Unigene17874_All;Unigene18108_All;Unigene56071_All;Unigene87377_All;Unigene950_All	K01190+K12309
Vitamin B6 metabolism	2	17	0.1597732	4.61E-01	ko00750	Unigene128716_All;Unigene57949_All	K06215
Pentose and glucuronate interconversions	13	228	0.1691168	4.74E-01	ko00040	Unigene120366_All;Unigene121605_All;Unigene121803_All;Unigene125287_All;Unigene19939_All;Unigene21084_All;Unigene37982_All;Unigene504_All;Unigene57397_All;Unigene66240_All;Unigene69900_All;Unigene73041_All;Unigene82427_All	K00128+K00963+K01184+K01051
Nicotinate and nicotinamide metabolism	4	53	0.1846739	5.04E-01	ko00760	Unigene1352_All;Unigene22298_All;Unigene48673_All;Unigene64364_All	K03426+K03787+K00858+K01950
Pentose phosphate pathway	10	172	0.1923953	5.11E-01	ko00030	Unigene121580_All;Unigene123670_All;Unigene125031_All;Unigene17517_All;Unigene20921_All;Unigene38590_All;Unigene3913_All;Unigene81758_All;Unigene86406_All;Unigene87915_All	K01624+K00033+K00615+K03841+K01810
Lysine degradation	9	156	0.2146505	5.48E-01	ko00310	Unigene120366_All;Unigene121958_All;Unigene125287_All;Unigene32086_All;Unigene33735_All;Unigene37982_All;Unigene6575_All;Unigene66240_All;Unigene69900_All	K00128+K00164+K11423+K11424
Propanoate metabolism	11	198	0.2169464	5.48E-01	ko00640	Unigene120366_All;Unigene120979_All;Unigene122962_All;Unigene125287_All;Unigene18645_All;Unigene37982_All;Unigene52088_All;Unigene52650_All;Unigene61065_All;Unigene66240_All;Unigene69900_All	K00128+K01895+K01899+K00249+K02160+K00224
Diterpenoid biosynthesis	5	78	0.2332336	5.75E-01	ko00904	Unigene12461_All;Unigene21299_All;Unigene49240_All;Unigene70242_All;Unigene83404_All	K13070+K04124+K05282
Glutathione metabolism	10	184	0.2514814	5.82E-01	ko00480	Unigene125031_All;Unigene13621_All;Unigene17517_All;Unigene20921_All;Unigene22482_All;Unigene30584_All;Unigene33181_All;Unigene43842_All;Unigene57614_All;Unigene9501_All	K00033+K00434+K00799+K01469
Ascorbate and aldarate metabolism	11	207	0.2600265	5.82E-01	ko00053	Unigene120366_All;Unigene125287_All;Unigene13621_All;Unigene27851_All;Unigene28904_All;Unigene37982_All;Unigene66240_All;Unigene69900_All;Unigene74669_All;Unigene82645_All;Unigene9501_All	K00128+K00434+K00423+K00064+K08232+K00469
Arginine and proline metabolism	11	207	0.2600265	5.82E-01	ko00330	Unigene120020_All;Unigene120324_All;Unigene120366_All;Unigene12289_All;Unigene125287_All;Unigene37982_All;Unigene42754_All;Unigene51689_All;Unigene66240_All;Unigene69013_All;Unigene69900_All	K01259+K01915+K00128+K01583+K00813+K01611
Citrate cycle (TCA cycle)	14	273	0.2657341	5.82E-01	ko00020	Unigene121593_All;Unigene121958_All;Unigene122613_All;Unigene122962_All;Unigene124514_All;Unigene15869_All;Unigene32086_All;Unigene33735_All;Unigene34251_All;Unigene37194_All;Unigene52305_All;Unigene52581_All;Unigene53195_All;Unigene66380_All	K01610+K00164+K00026+K01899+K01648+K01681
Linoleic acid metabolism	2	24	0.2692435	5.82E-01	ko00591	Unigene68013_All;Unigene83100_All	K00454+K00100
One carbon pool by folate	3	43	0.2724392	5.82E-01	ko00670	Unigene125724_All;Unigene21171_All;Unigene32195_All	K00600+K01433+K00601
Carotenoid biosynthesis	12	232	0.2768052	5.82E-01	ko00906	Unigene12461_All;Unigene126004_All;Unigene16613_All;Unigene16993_All;Unigene19660_All;Unigene41179_All;Unigene4181_All;Unigene55128_All;Unigene70242_All;Unigene71110_All;Unigene80856_All;Unigene89326_All	K09841+K00514+K09838+K09843
Phenylalanine, tyrosine and tryptophan biosynthesis	6	107	0.2981985	6.01E-01	ko00400	Unigene13365_All;Unigene33497_All;Unigene40663_All;Unigene51689_All;Unigene62904_All;Unigene71966_All	K00500+K01657+K13832+K00813+K00815
Folate biosynthesis	2	26	0.3009523	6.01E-01	ko00790	Unigene2504_All;Unigene74694_All	K01307+K01495
Starch and sucrose metabolism	30	640	0.3035659	6.01E-01	ko00500	Unigene121605_All;Unigene121803_All;Unigene125476_All;Unigene13815_All;Unigene14331_All;Unigene14335_All;Unigene1703_All;Unigene19939_All;Unigene21084_All;Unigene25456_All;Unigene27336_All;Unigene31346_All;Unigene32035_All;Unigene42031_All;Unigene4591_All;Unigene504_All;Unigene51862_All;Unigene53623_All;Unigene57397_All;Unigene68615_All;Unigene73041_All;Unigene73686_All;Unigene75167_All;Unigene76…	K00963+K01184+K00700+K00975+K01188+K00697+K01087+K01051+K13648+K01177+K00705+K01179+K01193+K00695+K01810+K00844
Spliceosome	66	1479	0.3371015	6.55E-01	ko03040	Unigene119747_All;Unigene120764_All;Unigene122748_All;Unigene124284_All;Unigene124948_All;Unigene125035_All;Unigene125471_All;Unigene12566_All;Unigene125923_All;Unigene12841_All;Unigene128860_All;Unigene15183_All;Unigene16456_All;Unigene18024_All;Unigene19131_All;Unigene1949_All;Unigene22323_All;Unigene22777_All;Unigene23351_All;Unigene23547_All;Unigene24410_All;Unigene25931_All;Unigene26138_All;…	K12741+K11984+K11095+K03283+K12890+K12831+K11086+K12826+K12811+K12822+K11093+K12849+K12865+K12821+K12843+K12825+K13025+K12854+K12815+K12818+K12813+K06063+K12867+K12858+K12828+K12855+K12662
Tyrosine metabolism	10	201	0.3436878	6.55E-01	ko00350	Unigene115626_All;Unigene124543_All;Unigene126664_All;Unigene19025_All;Unigene20087_All;Unigene46307_All;Unigene51689_All;Unigene61056_All;Unigene71966_All;Unigene84035_All	K00451+K13953+K00422+K00813+K00815+K00121
Isoquinoline alkaloid biosynthesis	4	72	0.3619841	6.77E-01	ko00950	Unigene20087_All;Unigene51689_All;Unigene61056_All;Unigene71966_All	K00422+K00813+K00815
Tropane, piperidine and pyridine alkaloid biosynthesis	4	74	0.3813225	7.00E-01	ko00960	Unigene126968_All;Unigene20302_All;Unigene51689_All;Unigene71966_All	K08081+K00813+K00815
Zeatin biosynthesis	22	493	0.4260199	7.68E-01	ko00908	Unigene121127_All;Unigene130552_All;Unigene17519_All;Unigene18620_All;Unigene18717_All;Unigene18935_All;Unigene19744_All;Unigene21226_All;Unigene30849_All;Unigene35084_All;Unigene43388_All;Unigene43389_All;Unigene48333_All;Unigene59657_All;Unigene62997_All;Unigene6502_All;Unigene67578_All;Unigene71879_All;Unigene72271_All;Unigene73072_All;Unigene76076_All;Unigene88629_All	K10717+K13495+K10760+K13496+K13493
Valine, leucine and isoleucine degradation	9	195	0.4409354	7.81E-01	ko00280	Unigene120366_All;Unigene125287_All;Unigene14595_All;Unigene18645_All;Unigene30258_All;Unigene37982_All;Unigene66240_All;Unigene69900_All;Unigene87817_All	K00128+K01968+K00249+K01641+K09699
Histidine metabolism	5	104	0.4489746	7.82E-01	ko00340	Unigene120366_All;Unigene125287_All;Unigene37982_All;Unigene66240_All;Unigene69900_All	K00128
beta-Alanine metabolism	6	138	0.529527	9.06E-01	ko00410	Unigene120366_All;Unigene125287_All;Unigene18645_All;Unigene37982_All;Unigene66240_All;Unigene69900_All	K00128+K00249
C5-Branched dibasic acid metabolism	1	19	0.5595928	9.42E-01	ko00660	Unigene22327_All	K01703
Thiamine metabolism	1	21	0.5960293	9.74E-01	ko00730	Unigene31937_All	K03707
SNARE interactions in vesicular transport	4	98	0.5981142	9.74E-01	ko04130	Unigene31187_All;Unigene58034_All;Unigene59575_All;Unigene94805_All	K08486+K08508+K08509+K08488
Cysteine and methionine metabolism	10	252	0.6243639	9.97E-01	ko00270	Unigene126032_All;Unigene1291_All;Unigene21159_All;Unigene24309_All;Unigene45580_All;Unigene46752_All;Unigene51385_All;Unigene51689_All;Unigene69013_All;Unigene71966_All	K00558+K01762+K00133+K05933+K00813+K01611+K00815
Alanine, aspartate and glutamate metabolism	7	179	0.6351181	9.97E-01	ko00250	Unigene120324_All;Unigene121203_All;Unigene12289_All;Unigene16281_All;Unigene16282_All;Unigene30285_All;Unigene51689_All	K01915+K00264+K01955+K00813
Endocytosis	19	482	0.6538379	9.97E-01	ko04144	Unigene120670_All;Unigene124284_All;Unigene124948_All;Unigene125923_All;Unigene12841_All;Unigene19131_All;Unigene19855_All;Unigene23351_All;Unigene38078_All;Unigene44986_All;Unigene49040_All;Unigene616_All;Unigene67301_All;Unigene70636_All;Unigene74399_All;Unigene77101_All;Unigene85565_All;Unigene86069_All;Unigene87002_All	K11247+K03283+K01115+K12200+K07905+K12486
Phosphatidylinositol signaling system	7	184	0.6634767	9.97E-01	ko04070	Unigene122720_All;Unigene124179_All;Unigene40178_All;Unigene56199_All;Unigene61181_All;Unigene69970_All;Unigene72909_All	K02183+K05857+K00888+K01092
O-Mannosyl glycan biosynthesis	1	26	0.6744816	9.97E-01	ko00514	Unigene42797_All	K09667
Cyanoamino acid metabolism	7	190	0.6956737	9.97E-01	ko00460	Unigene125724_All;Unigene14331_All;Unigene14335_All;Unigene25456_All;Unigene51862_All;Unigene80449_All;Unigene82670_All	K00600+K01188
Synthesis and degradation of ketone bodies	1	28	0.70142	9.97E-01	ko00072	Unigene30258_All	K01641
Protein processing in endoplasmic reticulum	40	1019	0.7073152	9.97E-01	ko04141	Unigene122058_All;Unigene12351_All;Unigene123617_All;Unigene124241_All;Unigene124284_All;Unigene124502_All;Unigene124948_All;Unigene125923_All;Unigene12841_All;Unigene128698_All;Unigene1325_All;Unigene1326_All;Unigene14201_All;Unigene15136_All;Unigene19131_All;Unigene23351_All;Unigene30267_All;Unigene30696_All;Unigene42353_All;Unigene43341_All;Unigene44986_All;Unigene44987_All;Unigene489_All;Unig…	K06689+K10956+K08653+K04079+K03283+K07953+K14005+K09561+K03868+K13719+K10666+K14007+K14001+K10839+K13993+K14026+K09580+K09518+K11718
Regulation of autophagy	3	86	0.7094155	9.97E-01	ko04140	Unigene17737_All;Unigene27780_All;Unigene84042_All	K07198+K08341
Ubiquinone and other terpenoid-quinone biosynthesis	3	87	0.7167643	9.97E-01	ko00130	Unigene2489_All;Unigene24935_All;Unigene71966_All	K02548+K01904+K00815
Circadian rhythm - mammal	1	31	0.7377094	9.97E-01	ko04710	Unigene14201_All	K03868
Photosynthesis	4	124	0.7733869	9.97E-01	ko00195	Unigene127147_All;Unigene28084_All;Unigene44296_All;Unigene69661_All	K02111+K02705+K02635+K03541
Glycine, serine and threonine metabolism	4	129	0.7990709	9.97E-01	ko00260	Unigene125724_All;Unigene126740_All;Unigene45580_All;Unigene83632_All	K00600+K00058+K00133+K00281
Protein export	5	171	0.8528117	9.97E-01	ko03060	Unigene12351_All;Unigene16955_All;Unigene43081_All;Unigene51095_All;Unigene560_All	K10956+K03070+K03217+K13431
Lysine biosynthesis	1	47	0.8686225	9.97E-01	ko00300	Unigene45580_All	K00133
Amino sugar and nucleotide sugar metabolism	12	379	0.8803228	9.97E-01	ko00520	Unigene11033_All;Unigene121353_All;Unigene121605_All;Unigene13815_All;Unigene27336_All;Unigene46053_All;Unigene57516_All;Unigene81054_All;Unigene81463_All;Unigene86406_All;Unigene87636_All;Unigene89430_All	K12447+K00963+K00975+K13648+K01183+K01840+K00326+K01810+K00844
ABC transporters	6	211	0.8850053	9.97E-01	ko02010	Unigene22777_All;Unigene40555_All;Unigene46168_All;Unigene47592_All;Unigene62013_All;Unigene7949_All	K05681+K05666+K05663
Glucosinolate biosynthesis	2	87	0.887098	9.97E-01	ko00966	Unigene59084_All;Unigene87891_All	K11821+K01649
RNA degradation	10	331	0.8960942	9.97E-01	ko03018	Unigene1394_All;Unigene43952_All;Unigene50334_All;Unigene56777_All;Unigene59104_All;Unigene67006_All;Unigene67301_All;Unigene71724_All;Unigene85565_All;Unigene89258_All	K04077+K03514+K04043+K12581+K12614+K10643
Nucleotide excision repair	8	277	0.902576	9.97E-01	ko03420	Unigene14201_All;Unigene15414_All;Unigene18471_All;Unigene25845_All;Unigene2902_All;Unigene3084_All;Unigene489_All;Unigene57516_All	K03868+K02202+K07466+K10839
Terpenoid backbone biosynthesis	11	376	0.9242827	9.97E-01	ko00900	Unigene17519_All;Unigene18620_All;Unigene19744_All;Unigene21197_All;Unigene30258_All;Unigene30849_All;Unigene48333_All;Unigene56657_All;Unigene59657_All;Unigene72271_All;Unigene85013_All	K05356+K01641
Glycosylphosphatidylinositol(GPI)-anchor biosynthesis	1	60	0.9251109	9.97E-01	ko00563	Unigene13986_All	K05286
Ubiquitin mediated proteolysis	14	463	0.9269318	9.97E-01	ko04120	Unigene122058_All;Unigene1325_All;Unigene1326_All;Unigene14201_All;Unigene15486_All;Unigene30696_All;Unigene32822_All;Unigene42078_All;Unigene43956_All;Unigene61320_All;Unigene67789_All;Unigene71182_All;Unigene73397_All;Unigene89430_All	K06689+K09561+K03868+K04706+K03348+K10576+K10615+K10592+K10143+K03364
Basal transcription factors	6	232	0.9299581	9.97E-01	ko03022	Unigene125030_All;Unigene15414_All;Unigene30093_All;Unigene3084_All;Unigene57103_All;Unigene74875_All	K03120+K02202+K03124+K03123
Plant-pathogen interaction	59	1665	0.9345201	9.97E-01	ko04626	Unigene1049_All;Unigene1052_All;Unigene12048_All;Unigene122720_All;Unigene124179_All;Unigene124241_All;Unigene125322_All;Unigene14340_All;Unigene14566_All;Unigene14896_All;Unigene16476_All;Unigene16645_All;Unigene17067_All;Unigene17624_All;Unigene17676_All;Unigene18039_All;Unigene18351_All;Unigene18754_All;Unigene18994_All;Unigene21400_All;Unigene27600_All;Unigene27602_All;Unigene28137_All;Unigen…	K13429+K13430+K02183+K04079+K13417+K13416+K13422+K13462+K13457+K13428+K13420+K13412+K13449+K13447+K04371+K13424+K13456+K00864+K13448
DNA replication	4	174	0.9391703	9.97E-01	ko03030	Unigene10130_All;Unigene18471_All;Unigene25845_All;Unigene2902_All	K02320+K07466
Porphyrin and chlorophyll metabolism	3	141	0.9402765	9.97E-01	ko00860	Unigene121132_All;Unigene28529_All;Unigene83988_All	K00522+K00510+K01698
Butanoate metabolism	2	107	0.9438182	9.97E-01	ko00650	Unigene30258_All;Unigene83100_All	K01641+K00100
Ether lipid metabolism	2	109	0.9476832	9.97E-01	ko00565	Unigene19855_All;Unigene616_All	K01115
Steroid biosynthesis	1	69	0.9492599	9.97E-01	ko00100	Unigene68624_All	K00511
Mismatch repair	3	155	0.961722	9.97E-01	ko03430	Unigene18471_All;Unigene25845_All;Unigene2902_All	K07466
Natural killer cell mediated cytotoxicity	2	121	0.9660493	9.97E-01	ko04650	Unigene49228_All;Unigene75107_All	K04371+K04392
Valine, leucine and isoleucine biosynthesis	2	125	0.9706555	9.97E-01	ko00290	Unigene22327_All;Unigene87891_All	K01703+K01649
Homologous recombination	3	164	0.9714305	9.97E-01	ko03440	Unigene18471_All;Unigene25845_All;Unigene2902_All	K07466
Base excision repair	2	160	0.9920388	9.97E-01	ko03410	Unigene44902_All;Unigene84019_All	K10803+K10802
Glycerophospholipid metabolism	4	241	0.9921152	9.97E-01	ko00564	Unigene19855_All;Unigene22651_All;Unigene616_All;Unigene86434_All	K01115+K00655+K00111
Phagosome	8	392	0.9939884	9.97E-01	ko04145	Unigene119771_All;Unigene12351_All;Unigene124129_All;Unigene125312_All;Unigene125698_All;Unigene46099_All;Unigene75107_All;Unigene94805_All	K05692+K10956+K07374+K02155+K04392+K08488
Proteasome	2	182	0.9965666	9.97E-01	ko03050	Unigene53533_All;Unigene83918_All	K02725+K03031
Aminoacyl-tRNA biosynthesis	3	226	0.9965795	9.97E-01	ko00970	Unigene27565_All;Unigene69711_All;Unigene69891_All	K01881+K01892+K01868
